# Supplementary material for: Regulation of shoot meristem shape by photoperiodic signaling and phytohormones during floral induction of Arabidopsis
Source: eLife journal article supplement (doi:10.7554/elife.60661), 2020-12-14
Supplement: supp [file elife-60661-supp-v1.zip]

Archive with 28 entries (28 files):
- elife_poa_e60661_Transparent_Reporting_File.pdf
- elife_poa_e60661_Figure_1_figure_supplement_1.jpg
- elife_poa_e60661_Figure_1_figure_supplement_2.jpg
- elife_poa_e60661_Figure_2_figure_supplement_1.jpg
- elife_poa_e60661_Figure_2_figure_supplement_2.jpg
- elife_poa_e60661_Figure_2_figure_supplement_3.jpg
- elife_poa_e60661_Figure_4_figure_supplement_1.jpg
- elife_poa_e60661_Figure_4_figure_supplement_2.jpg
- elife_poa_e60661_Figure_4_figure_supplement_3.jpg
- elife_poa_e60661_Figure_4_figure_supplement_4.jpg
- elife_poa_e60661_Figure_4_figure_supplement_5.jpg
- elife_poa_e60661_Figure_4_figure_supplement_6.jpg
- elife_poa_e60661_Figure_6_figure_supplement_1.jpg
- elife_poa_e60661_Figure_9_figure_supplement_1.jpg
- elife_poa_e60661_Figure_9_figure_supplement_2.jpg
- elife_poa_e60661_Figure_1_source_data_1.xlsx
- elife_poa_e60661_Figure1_source_data_2.xlsx
- elife_poa_e60661_Figure_3_source_data_1.xlsx
- elife_poa_e60661_Figure_3_source_data_2.xlsx
- elife_poa_e60661_Figure_6_source_data_1.xlsx
- elife_poa_e60661_Figure_6_source_data_2.xlsx
- elife_poa_e60661_Figure_7_source_data_1.xlsx
- elife_poa_e60661_Figure_7_source_data_2.xlsx
- elife_poa_e60661_Figure_8_source_data_1.xlsx
- elife_poa_e60661_Supplementary_file_1.xlsx
- elife_poa_e60661_Supplementary_file_2.xlsx
- elife_poa_e60661_Supplementary_file_3.xlsx
- elife_poa_e60661_Supplementary_file_4.xlsx
