# Supplementary material for: Regulation of shoot meristem shape by photoperiodic signaling and phytohormones during floral induction of Arabidopsis
Source: eLife journal article supplement (doi:10.7554/elife.60661), 2020-12-14
Supplement: supp [file elife-60661-supp-v1.zip › elife_poa_e60661_Figure1_source_data_2.xlsx]

## Sheet: Dataset2
Figure 1-source data 2. Original data of cell size of each genotype for Figure 1A, D and G and Figure 1- figure supplement 2
Genotype	Time point	Plant number	Cell label	Cell area (µm^2)	Distance from the central cell	Zone
Col-0	2wSD	3	1	39.39	2	CZ
Col-0	2wSD	3	2	21.17	1	CZ
Col-0	2wSD	3	3	26.07	0	CZ
Col-0	2wSD	3	4	36.18	1	CZ
Col-0	2wSD	3	5	41.79	2	CZ
Col-0	2wSD	3	6	30.12	3	PZ
Col-0	2wSD	3	7	35.81	3	PZ
Col-0	2wSD	3	8	35.13	2	CZ
Col-0	2wSD	3	10	25.1	3	PZ
Col-0	2wSD	3	11	20.8	3	PZ
Col-0	2wSD	3	12	27.97	2	CZ
Col-0	2wSD	3	13	31.24	1	CZ
Col-0	2wSD	3	14	29.37	1	CZ
Col-0	2wSD	3	15	34.38	1	CZ
Col-0	2wSD	3	16	30.68	1	CZ
Col-0	2wSD	3	17	29.67	2	CZ
Col-0	2wSD	3	18	21.43	2	CZ
Col-0	2wSD	3	19	23.2	3	PZ
Col-0	2wSD	3	20	32.05	3	PZ
Col-0	2wSD	3	21	39.19	3	PZ
Col-0	2wSD	3	22	33.49	4	PZ
Col-0	2wSD	3	23	29.33	4	PZ
Col-0	2wSD	3	24	26.98	5	PZ
Col-0	2wSD	3	47	24.23	4	PZ
Col-0	2wSD	3	48	26.36	3	PZ
Col-0	2wSD	3	49	29.9	2	CZ
Col-0	2wSD	3	50	24.1	2	CZ
Col-0	2wSD	3	51	28.6	2	CZ
Col-0	2wSD	3	52	35.97	3	PZ
Col-0	2wSD	3	53	44.51	2	CZ
Col-0	2wSD	3	54	34.48	2	CZ
Col-0	2wSD	3	55	35.81	3	PZ
Col-0	2wSD	3	56	42.13	3	PZ
Col-0	2wSD	3	57	30.28	3	PZ
Col-0	2wSD	3	58	20.53	4	PZ
Col-0	2wSD	3	59	20.6	5	PZ
Col-0	2wSD	3	60	28.67	5	PZ
Col-0	2wSD	3	61	40.52	6	NA
Col-0	2wSD	3	62	42.43	6	NA
Col-0	2wSD	3	63	46.83	3	PZ
Col-0	2wSD	3	77	52.13	4	PZ
Col-0	2wSD	3	78	35.19	3	PZ
Col-0	2wSD	3	79	32.34	4	PZ
Col-0	2wSD	3	80	31.22	4	PZ
Col-0	2wSD	3	85	24	3	PZ
Col-0	2wSD	3	87	25.53	4	PZ
Col-0	2wSD	3	88	33.19	4	PZ
Col-0	2wSD	3	89	32.37	5	PZ
Col-0	2wSD	3	97	52.27	6	NA
Col-0	2wSD	3	98	16.76	2	CZ
Col-0	2wSD	3	99	27.74	3	PZ
Col-0	2wSD	3	101	43.38	3	PZ
Col-0	2wSD	6	3461	47.33	3	PZ
Col-0	2wSD	6	3462	37.49	2	CZ
Col-0	2wSD	6	3463	41.5	2	CZ
Col-0	2wSD	6	3464	29.33	1	CZ
Col-0	2wSD	6	3465	29.16	1	CZ
Col-0	2wSD	6	3466	38.3	2	CZ
Col-0	2wSD	6	3467	30.47	3	PZ
Col-0	2wSD	6	3468	46.44	3	PZ
Col-0	2wSD	6	3471	43.54	2	CZ
Col-0	2wSD	6	3472	32.11	1	CZ
Col-0	2wSD	6	3473	29.88	0	CZ
Col-0	2wSD	6	3474	30.54	1	CZ
Col-0	2wSD	6	3475	23.21	2	CZ
Col-0	2wSD	6	3476	32.19	2	CZ
Col-0	2wSD	6	3477	23.43	2	CZ
Col-0	2wSD	6	3478	28.26	3	PZ
Col-0	2wSD	6	3479	27.84	3	PZ
Col-0	2wSD	6	3482	19.38	3	PZ
Col-0	2wSD	6	3483	36.06	3	PZ
Col-0	2wSD	6	3484	22.49	4	PZ
Col-0	2wSD	6	3485	31.92	4	PZ
Col-0	2wSD	6	3486	22.1	4	PZ
Col-0	2wSD	6	3491	18.1	4	PZ
Col-0	2wSD	6	3493	33.82	3	PZ
Col-0	2wSD	6	3494	38.18	3	PZ
Col-0	2wSD	6	3495	26.13	4	PZ
Col-0	2wSD	6	3496	36.14	5	PZ
Col-0	2wSD	6	3509	26.71	1	CZ
Col-0	2wSD	6	3510	22.13	2	CZ
Col-0	2wSD	6	3511	32.4	2	CZ
Col-0	2wSD	6	3512	30.44	3	PZ
Col-0	2wSD	6	3513	20.66	3	PZ
Col-0	2wSD	6	3523	33.94	4	PZ
Col-0	2wSD	6	3524	29.76	5	PZ
Col-0	2wSD	6	3526	38.9	5	PZ
Col-0	2wSD	6	3527	34.88	4	PZ
Col-0	2wSD	6	3528	39.13	3	PZ
Col-0	2wSD	6	3529	38.59	2	CZ
Col-0	2wSD	6	3530	15.87	3	PZ
Col-0	2wSD	6	3531	30.61	4	PZ
Col-0	2wSD	6	3532	28.5	3	PZ
Col-0	2wSD	6	3533	26.08	3	PZ
Col-0	2wSD	6	3534	26.82	3	PZ
Col-0	2wSD	6	3536	24.46	4	PZ
Col-0	2wSD	6	3537	28.67	5	PZ
Col-0	2wSD	6	3539	25.64	6	NA
Col-0	2wSD	6	3540	30.28	6	NA
Col-0	2wSD	6	3549	45.77	4	PZ
Col-0	2wSD	6	3550	26.64	5	PZ
Col-0	2wSD	6	3551	33.33	5	PZ
Col-0	2wSD	6	3555	32.68	6	NA
Col-0	2wSD	6	3557	52.14	6	NA
Col-0	2wSD	6	3621	26.48	6	NA
Col-0	2wSD	9	2153	36.04	0	CZ
Col-0	2wSD	9	2154	22.18	1	CZ
Col-0	2wSD	9	2155	13.23	1	CZ
Col-0	2wSD	9	2156	17.06	2	CZ
Col-0	2wSD	9	2157	34.04	2	CZ
Col-0	2wSD	9	2158	39.56	3	PZ
Col-0	2wSD	9	2159	38.99	2	CZ
Col-0	2wSD	9	2160	23.09	1	CZ
Col-0	2wSD	9	2161	15.65	2	CZ
Col-0	2wSD	9	2162	23.3	1	CZ
Col-0	2wSD	9	2164	31.73	1	CZ
Col-0	2wSD	9	2165	32.11	2	CZ
Col-0	2wSD	9	2166	29.91	3	PZ
Col-0	2wSD	9	2167	23.16	3	PZ
Col-0	2wSD	9	2170	28.98	3	PZ
Col-0	2wSD	9	2172	52.21	3	PZ
Col-0	2wSD	9	2173	28.07	4	PZ
Col-0	2wSD	9	2174	43.01	4	PZ
Col-0	2wSD	9	2177	31.35	3	PZ
Col-0	2wSD	9	2183	24.39	3	PZ
Col-0	2wSD	9	2185	25.8	2	CZ
Col-0	2wSD	9	2186	26.84	1	CZ
Col-0	2wSD	9	2187	38.36	1	CZ
Col-0	2wSD	9	2188	48.07	2	CZ
Col-0	2wSD	9	2189	30.33	3	PZ
Col-0	2wSD	9	2192	33.71	4	PZ
Col-0	2wSD	9	2193	23.57	5	PZ
Col-0	2wSD	9	2194	22.86	5	PZ
Col-0	2wSD	9	2195	46.06	5	PZ
Col-0	2wSD	9	2196	41.06	6	NA
Col-0	2wSD	9	2198	37.04	6	NA
Col-0	2wSD	9	2202	50.52	4	PZ
Col-0	2wSD	9	2223	25.55	4	PZ
Col-0	2wSD	9	2224	30.32	3	PZ
Col-0	2wSD	9	2225	30	4	PZ
Col-0	2wSD	9	2226	41.74	2	CZ
Col-0	2wSD	9	2227	25.25	3	PZ
Col-0	2wSD	9	2228	26.39	4	PZ
Col-0	2wSD	9	2229	22.73	4	PZ
Col-0	2wSD	9	2230	23.72	3	PZ
Col-0	2wSD	9	2231	41.2	2	CZ
Col-0	2wSD	9	2232	47.22	3	PZ
Col-0	2wSD	9	2233	29.52	3	PZ
Col-0	2wSD	9	2234	39.13	4	PZ
Col-0	2wSD	9	2236	39.9	3	PZ
Col-0	2wSD	9	2239	47	5	PZ
Col-0	2wSD	9	2240	13.1	6	NA
Col-0	2wSD	9	2241	39.85	6	NA
Col-0	2wSD	9	2242	41.58	6	NA
Col-0	2wSD	9	2243	16.67	5	PZ
Col-0	2wSD	9	2244	20.62	5	PZ
Col-0	2wSD	9	2245	28.13	4	PZ
Col-0	2wSD	9	2246	37.03	5	PZ
Col-0	2wSD	9	2266	19.71	5	PZ
Col-0	2wSD	9	2298	31.79	2	CZ
Col-0	2wSD	9	2299	32.25	3	PZ
Col-0	2wSD	9	2301	34.31	3	PZ
Col-0	2wSD	9	2302	32.63	4	PZ
Col-0	2wSD	9	2319	22.56	2	CZ
Col-0	2wSD	9	2320	18.73	2	CZ
Col-0	2wSD	9	2321	29.94	4	PZ
Col-0	2wSD	9	2322	17.06	4	PZ
Col-0	+3LD	3	2912	64.45	4	PZ
Col-0	+3LD	3	2921	37	4	PZ
Col-0	+3LD	3	2924	34.94	5	PZ
Col-0	+3LD	3	2930	59.71	3	PZ
Col-0	+3LD	3	2931	24.19	5	PZ
Col-0	+3LD	3	2932	36.08	6	NA
Col-0	+3LD	3	2933	32.85	5	PZ
Col-0	+3LD	3	2936	38.74	3	PZ
Col-0	+3LD	3	2937	25.89	4	PZ
Col-0	+3LD	3	2938	50.83	3	PZ
Col-0	+3LD	3	2944	37.61	5	PZ
Col-0	+3LD	3	2945	42.21	2	CZ
Col-0	+3LD	3	2948	33.32	5	PZ
Col-0	+3LD	3	2951	55.67	4	PZ
Col-0	+3LD	3	2952	36.34	2	CZ
Col-0	+3LD	3	2953	28.2	2	CZ
Col-0	+3LD	3	2955	38.56	3	PZ
Col-0	+3LD	3	2959	31.32	4	PZ
Col-0	+3LD	3	2961	30.5	5	PZ
Col-0	+3LD	3	2962	34.7	5	PZ
Col-0	+3LD	3	2964	42.06	4	PZ
Col-0	+3LD	3	2965	36.83	1	CZ
Col-0	+3LD	3	2966	25.96	4	PZ
Col-0	+3LD	3	2969	32.1	1	CZ
Col-0	+3LD	3	2971	24.02	6	NA
Col-0	+3LD	3	2973	27.34	3	PZ
Col-0	+3LD	3	2981	24.52	5	PZ
Col-0	+3LD	3	2982	26.06	4	PZ
Col-0	+3LD	3	2983	27.88	1	CZ
Col-0	+3LD	3	2985	32.43	7	NA
Col-0	+3LD	3	3002	39.38	4	PZ
Col-0	+3LD	3	3003	47.84	3	PZ
Col-0	+3LD	3	3006	40.68	5	PZ
Col-0	+3LD	3	3008	32.62	1	CZ
Col-0	+3LD	3	3009	42.49	3	PZ
Col-0	+3LD	3	3013	39.49	5	PZ
Col-0	+3LD	3	3021	41.13	2	CZ
Col-0	+3LD	3	3025	41.38	4	PZ
Col-0	+3LD	3	3029	30.41	5	PZ
Col-0	+3LD	3	3031	34.78	4	PZ
Col-0	+3LD	3	3036	32.2	4	PZ
Col-0	+3LD	3	3043	40.05	2	CZ
Col-0	+3LD	3	3045	51.22	2	CZ
Col-0	+3LD	3	3047	33.94	4	PZ
Col-0	+3LD	3	3049	20.25	6	NA
Col-0	+3LD	3	3052	49.33	0	CZ
Col-0	+3LD	3	3054	28.57	1	CZ
Col-0	+3LD	3	3056	37.08	2	CZ
Col-0	+3LD	3	3057	40.26	3	PZ
Col-0	+3LD	3	3058	25.81	5	PZ
Col-0	+3LD	3	3059	18.62	6	NA
Col-0	+3LD	3	3061	45.44	2	CZ
Col-0	+3LD	3	3067	35.03	6	NA
Col-0	+3LD	3	3071	61.87	4	PZ
Col-0	+3LD	3	3073	36.01	5	PZ
Col-0	+3LD	3	3082	23.67	3	PZ
Col-0	+3LD	3	3083	24.57	4	PZ
Col-0	+3LD	3	3089	57.77	3	PZ
Col-0	+3LD	3	3090	64.04	4	PZ
Col-0	+3LD	3	3097	50.71	4	PZ
Col-0	+3LD	3	3098	34.5	5	PZ
Col-0	+3LD	3	3102	64.2	6	NA
Col-0	+3LD	3	3105	24.81	5	PZ
Col-0	+3LD	3	3106	28.33	3	PZ
Col-0	+3LD	3	3107	48.87	1	CZ
Col-0	+3LD	3	3108	30.23	7	NA
Col-0	+3LD	3	3112	38.76	5	PZ
Col-0	+3LD	3	3113	42.67	5	PZ
Col-0	+3LD	3	3116	50.07	3	PZ
Col-0	+3LD	3	3118	32.76	1	CZ
Col-0	+3LD	3	3121	30.22	4	PZ
Col-0	+3LD	3	3123	37.14	5	PZ
Col-0	+3LD	3	3127	57.48	5	PZ
Col-0	+3LD	3	3128	33.65	2	CZ
Col-0	+3LD	3	3132	28.09	3	PZ
Col-0	+3LD	3	3133	34.05	2	CZ
Col-0	+3LD	3	3134	16.86	6	NA
Col-0	+3LD	3	3135	37.37	6	NA
Col-0	+3LD	3	3140	49.65	2	CZ
Col-0	+3LD	3	3142	46.79	6	NA
Col-0	+3LD	3	3148	30.67	4	PZ
Col-0	+3LD	3	3150	25.35	6	NA
Col-0	+3LD	3	3153	41.62	4	PZ
Col-0	+3LD	3	3154	25.49	3	PZ
Col-0	+3LD	3	3155	40.68	3	PZ
Col-0	+3LD	3	3156	24.23	5	PZ
Col-0	+3LD	3	3159	30.49	3	PZ
Col-0	+3LD	3	3202	44.47	5	PZ
Col-0	+3LD	3	3204	57.66	5	PZ
Col-0	+3LD	3	3213	24.93	4	PZ
Col-0	+3LD	3	3214	45.89	4	PZ
Col-0	+3LD	3	3215	46.6	4	PZ
Col-0	+3LD	3	3216	46.67	4	PZ
Col-0	+3LD	3	3217	20.59	4	PZ
Col-0	+3LD	3	3227	33.41	3	PZ
Col-0	+3LD	3	3230	69.12	5	PZ
Col-0	+3LD	4	3	36.13	2	CZ
Col-0	+3LD	4	8	35.57	4	PZ
Col-0	+3LD	4	13	41.95	3	PZ
Col-0	+3LD	4	18	50.06	6	NA
Col-0	+3LD	4	20	53.58	5	PZ
Col-0	+3LD	4	22	39.65	7	NA
Col-0	+3LD	4	24	41.72	1	CZ
Col-0	+3LD	4	30	42.1	2	CZ
Col-0	+3LD	4	38	30.98	1	CZ
Col-0	+3LD	4	43	53.25	4	PZ
Col-0	+3LD	4	46	36.16	4	PZ
Col-0	+3LD	4	53	37.86	3	PZ
Col-0	+3LD	4	54	45.01	3	PZ
Col-0	+3LD	4	57	36.88	4	PZ
Col-0	+3LD	4	58	26.56	2	CZ
Col-0	+3LD	4	59	34.79	3	PZ
Col-0	+3LD	4	60	32.35	4	PZ
Col-0	+3LD	4	67	30.3	6	NA
Col-0	+3LD	4	68	35.4	5	PZ
Col-0	+3LD	4	69	34.93	7	NA
Col-0	+3LD	4	77	30.76	5	PZ
Col-0	+3LD	4	82	41.72	6	NA
Col-0	+3LD	4	84	19.9	5	PZ
Col-0	+3LD	4	86	49.51	4	PZ
Col-0	+3LD	4	92	35.57	2	CZ
Col-0	+3LD	4	93	31.66	4	PZ
Col-0	+3LD	4	100	41.49	2	CZ
Col-0	+3LD	4	104	43.68	2	CZ
Col-0	+3LD	4	105	37.83	6	NA
Col-0	+3LD	4	111	20.17	4	PZ
Col-0	+3LD	4	113	28.44	6	NA
Col-0	+3LD	4	117	47.83	4	PZ
Col-0	+3LD	4	120	32.76	5	PZ
Col-0	+3LD	4	125	49.62	5	PZ
Col-0	+3LD	4	129	42.7	5	PZ
Col-0	+3LD	4	134	32.09	5	PZ
Col-0	+3LD	4	136	23.41	3	PZ
Col-0	+3LD	4	140	33.84	5	PZ
Col-0	+3LD	4	141	30.82	4	PZ
Col-0	+3LD	4	142	20.22	3	PZ
Col-0	+3LD	4	144	43.75	3	PZ
Col-0	+3LD	4	147	43.17	5	PZ
Col-0	+3LD	4	149	40.15	3	PZ
Col-0	+3LD	4	151	53.43	4	PZ
Col-0	+3LD	4	153	33.4	7	NA
Col-0	+3LD	4	155	35.41	6	NA
Col-0	+3LD	4	156	29.59	4	PZ
Col-0	+3LD	4	159	38.73	3	PZ
Col-0	+3LD	4	168	36.02	7	NA
Col-0	+3LD	4	169	22.41	1	CZ
Col-0	+3LD	4	172	52.53	4	PZ
Col-0	+3LD	4	174	47.37	6	NA
Col-0	+3LD	4	176	37.68	0	CZ
Col-0	+3LD	4	177	36.2	1	CZ
Col-0	+3LD	4	185	37.06	4	PZ
Col-0	+3LD	4	186	38.85	4	PZ
Col-0	+3LD	4	191	28.56	4	PZ
Col-0	+3LD	4	195	27.36	2	CZ
Col-0	+3LD	4	196	28.22	3	PZ
Col-0	+3LD	4	197	49.83	7	NA
Col-0	+3LD	4	200	43.31	3	PZ
Col-0	+3LD	4	201	36.09	7	NA
Col-0	+3LD	4	205	34.71	7	NA
Col-0	+3LD	4	210	44.46	2	CZ
Col-0	+3LD	4	217	32.85	3	PZ
Col-0	+3LD	4	219	31.5	6	NA
Col-0	+3LD	4	220	51.66	5	PZ
Col-0	+3LD	4	225	49.87	7	NA
Col-0	+3LD	4	227	37.57	5	PZ
Col-0	+3LD	4	231	26.76	6	NA
Col-0	+3LD	4	235	42.49	6	NA
Col-0	+3LD	4	236	20.62	1	CZ
Col-0	+3LD	4	237	47.64	3	PZ
Col-0	+3LD	4	238	54.25	4	PZ
Col-0	+3LD	4	241	28.84	5	PZ
Col-0	+3LD	4	248	34.92	5	PZ
Col-0	+3LD	4	255	37.49	5	PZ
Col-0	+3LD	4	264	55.74	5	PZ
Col-0	+3LD	4	265	26.79	5	PZ
Col-0	+3LD	4	266	45.39	5	PZ
Col-0	+3LD	4	268	51.23	6	NA
Col-0	+3LD	4	269	33.79	6	NA
Col-0	+3LD	4	270	25.82	5	PZ
Col-0	+3LD	4	271	24.09	5	PZ
Col-0	+3LD	4	272	47.69	6	NA
Col-0	+3LD	4	273	30.37	2	CZ
Col-0	+3LD	4	274	34.42	1	CZ
Col-0	+3LD	4	275	39.36	8	NA
Col-0	+3LD	4	276	37.37	7	NA
Col-0	+3LD	4	277	27.57	6	NA
Col-0	+3LD	4	281	60.25	7	NA
Col-0	+3LD	4	282	31.58	4	PZ
Col-0	+3LD	4	283	18.48	5	PZ
Col-0	+3LD	4	284	41.32	2	CZ
Col-0	+3LD	4	285	17.06	3	PZ
Col-0	+3LD	4	288	15.02	4	PZ
Col-0	+3LD	4	345	24.13	6	NA
Col-0	+3LD	4	346	45.82	6	NA
Col-0	+3LD	5	3241	28.42	4	PZ
Col-0	+3LD	5	3242	52.52	5	PZ
Col-0	+3LD	5	3243	29.42	5	PZ
Col-0	+3LD	5	3251	47.92	2	CZ
Col-0	+3LD	5	3253	44.42	8	NA
Col-0	+3LD	5	3255	43.63	7	NA
Col-0	+3LD	5	3256	51.34	8	NA
Col-0	+3LD	5	3257	44.48	4	PZ
Col-0	+3LD	5	3260	28.36	8	NA
Col-0	+3LD	5	3265	36.84	3	PZ
Col-0	+3LD	5	3266	46.06	4	PZ
Col-0	+3LD	5	3269	57.1	8	NA
Col-0	+3LD	5	3271	49.03	4	PZ
Col-0	+3LD	5	3273	28.42	2	CZ
Col-0	+3LD	5	3276	43.99	4	PZ
Col-0	+3LD	5	3279	35.58	3	PZ
Col-0	+3LD	5	3284	41.71	5	PZ
Col-0	+3LD	5	3287	38.88	1	CZ
Col-0	+3LD	5	3288	38.28	3	PZ
Col-0	+3LD	5	3289	32.92	4	PZ
Col-0	+3LD	5	3290	41.93	4	PZ
Col-0	+3LD	5	3297	16.25	2	CZ
Col-0	+3LD	5	3299	55.23	5	PZ
Col-0	+3LD	5	3301	48.28	5	PZ
Col-0	+3LD	5	3303	51.21	6	NA
Col-0	+3LD	5	3304	29.66	3	PZ
Col-0	+3LD	5	3306	37.84	3	PZ
Col-0	+3LD	5	3307	35.23	5	PZ
Col-0	+3LD	5	3308	44.02	6	NA
Col-0	+3LD	5	3312	29.44	6	NA
Col-0	+3LD	5	3315	12.75	3	PZ
Col-0	+3LD	5	3317	43.46	5	PZ
Col-0	+3LD	5	3319	32.97	3	PZ
Col-0	+3LD	5	3320	47.3	8	NA
Col-0	+3LD	5	3321	49.93	7	NA
Col-0	+3LD	5	3323	53.14	5	PZ
Col-0	+3LD	5	3330	55.68	5	PZ
Col-0	+3LD	5	3332	57.47	4	PZ
Col-0	+3LD	5	3334	42.89	8	NA
Col-0	+3LD	5	3335	52.51	5	PZ
Col-0	+3LD	5	3339	34.57	7	NA
Col-0	+3LD	5	3340	39.26	6	NA
Col-0	+3LD	5	3342	25.02	5	PZ
Col-0	+3LD	5	3343	22.68	7	NA
Col-0	+3LD	5	3344	76.22	6	NA
Col-0	+3LD	5	3345	45.36	6	NA
Col-0	+3LD	5	3347	40.04	7	NA
Col-0	+3LD	5	3348	31.42	4	PZ
Col-0	+3LD	5	3351	28.78	1	CZ
Col-0	+3LD	5	3356	37.46	4	PZ
Col-0	+3LD	5	3357	41.65	6	NA
Col-0	+3LD	5	3361	43.48	5	PZ
Col-0	+3LD	5	3362	46.62	6	NA
Col-0	+3LD	5	3367	57.44	4	PZ
Col-0	+3LD	5	3368	37.06	5	PZ
Col-0	+3LD	5	3377	36.02	6	NA
Col-0	+3LD	5	3382	23.41	6	NA
Col-0	+3LD	5	3385	21.21	5	PZ
Col-0	+3LD	5	3392	35.88	3	PZ
Col-0	+3LD	5	3395	47.46	4	PZ
Col-0	+3LD	5	3397	51.96	7	NA
Col-0	+3LD	5	3398	43.38	3	PZ
Col-0	+3LD	5	3404	47.83	0	CZ
Col-0	+3LD	5	3409	24.64	1	CZ
Col-0	+3LD	5	3413	31.39	6	NA
Col-0	+3LD	5	3414	44.25	5	PZ
Col-0	+3LD	5	3416	29.43	4	PZ
Col-0	+3LD	5	3418	42.93	8	NA
Col-0	+3LD	5	3419	27.24	7	NA
Col-0	+3LD	5	3420	37.86	5	PZ
Col-0	+3LD	5	3421	41.31	3	PZ
Col-0	+3LD	5	3422	34.35	2	CZ
Col-0	+3LD	5	3424	38.34	1	CZ
Col-0	+3LD	5	3425	45.17	5	PZ
Col-0	+3LD	5	3438	27.62	3	PZ
Col-0	+3LD	5	3440	34.19	3	PZ
Col-0	+3LD	5	3442	47.85	4	PZ
Col-0	+3LD	5	3444	40.31	5	PZ
Col-0	+3LD	5	3446	29.31	7	NA
Col-0	+3LD	5	3447	47.98	4	PZ
Col-0	+3LD	5	3450	27.74	6	NA
Col-0	+3LD	5	3451	42.86	4	PZ
Col-0	+3LD	5	3452	57.37	7	NA
Col-0	+3LD	5	3454	30.87	5	PZ
Col-0	+3LD	5	3455	35.16	3	PZ
Col-0	+3LD	5	3456	30.6	6	NA
Col-0	+3LD	5	3459	38.65	4	PZ
Col-0	+3LD	5	3460	43.85	3	PZ
Col-0	+3LD	5	3461	50.4	6	NA
Col-0	+3LD	5	3462	56.75	7	NA
Col-0	+3LD	5	3464	31.36	6	NA
Col-0	+3LD	5	3465	42.17	4	PZ
Col-0	+3LD	5	3466	31.1	2	CZ
Col-0	+3LD	5	3467	54.68	3	PZ
Col-0	+3LD	5	3468	38.43	3	PZ
Col-0	+3LD	5	3469	46.78	4	PZ
Col-0	+3LD	5	3471	26.72	4	PZ
Col-0	+3LD	5	3473	47.48	2	CZ
Col-0	+3LD	5	3475	46.42	5	PZ
Col-0	+3LD	5	3476	29.76	5	PZ
Col-0	+3LD	5	3477	24.44	4	PZ
Col-0	+3LD	5	3478	44.66	3	PZ
Col-0	+3LD	5	3479	34.55	3	PZ
Col-0	+3LD	5	3481	49.45	9	NA
Col-0	+3LD	5	3484	24.14	1	CZ
Col-0	+3LD	5	3485	34.44	2	CZ
Col-0	+3LD	5	3491	24.98	1	CZ
Col-0	+3LD	5	3493	31.72	4	PZ
Col-0	+3LD	5	3512	35.82	6	NA
Col-0	+3LD	5	3513	49.1	5	PZ
Col-0	+3LD	5	3514	29.07	2	CZ
Col-0	+3LD	5	3517	23.33	5	PZ
Col-0	+3LD	5	3518	36.84	3	PZ
Col-0	+3LD	5	3519	29.17	4	PZ
Col-0	+3LD	5	3520	30.72	5	PZ
Col-0	+3LD	5	3521	19.12	2	CZ
Col-0	+3LD	5	3525	45.46	1	CZ
Col-0	+3LD	5	3529	35.06	2	CZ
Col-0	+3LD	5	3530	17.27	3	PZ
Col-0	+3LD	5	3531	57.46	5	PZ
Col-0	+3LD	5	3532	76.05	5	PZ
Col-0	+3LD	5	3546	52.77	6	NA
Col-0	+3LD	5	3588	53.1	2	CZ
Col-0	+3SD	4	1	49.75	1	CZ
Col-0	+3SD	4	2	27.74	2	CZ
Col-0	+3SD	4	3	42.48	3	PZ
Col-0	+3SD	4	4	42.39	2	CZ
Col-0	+3SD	4	5	34.72	2	CZ
Col-0	+3SD	4	6	49.86	1	CZ
Col-0	+3SD	4	7	36.33	2	CZ
Col-0	+3SD	4	9	44.69	2	CZ
Col-0	+3SD	4	10	21.81	3	PZ
Col-0	+3SD	4	11	32.35	3	PZ
Col-0	+3SD	4	12	30.96	3	PZ
Col-0	+3SD	4	13	38.33	3	PZ
Col-0	+3SD	4	28	26.54	5	PZ
Col-0	+3SD	4	34	33.49	5	PZ
Col-0	+3SD	4	35	35.9	4	PZ
Col-0	+3SD	4	36	39.08	5	PZ
Col-0	+3SD	4	38	14.35	4	PZ
Col-0	+3SD	4	39	40.53	4	PZ
Col-0	+3SD	4	40	31.36	5	PZ
Col-0	+3SD	4	44	23.35	4	PZ
Col-0	+3SD	4	45	31.53	4	PZ
Col-0	+3SD	4	46	31.05	3	PZ
Col-0	+3SD	4	47	32.37	2	CZ
Col-0	+3SD	4	48	35.44	3	PZ
Col-0	+3SD	4	49	34.4	2	CZ
Col-0	+3SD	4	50	28.36	3	PZ
Col-0	+3SD	4	52	33.37	3	PZ
Col-0	+3SD	4	53	39.47	2	CZ
Col-0	+3SD	4	54	32.02	1	CZ
Col-0	+3SD	4	55	26.6	0	CZ
Col-0	+3SD	4	56	36.4	1	CZ
Col-0	+3SD	4	57	29.49	2	CZ
Col-0	+3SD	4	58	31.43	3	PZ
Col-0	+3SD	4	59	46.62	2	CZ
Col-0	+3SD	4	60	50.97	3	PZ
Col-0	+3SD	4	61	45.47	4	PZ
Col-0	+3SD	4	75	44.25	3	PZ
Col-0	+3SD	4	77	48.48	4	PZ
Col-0	+3SD	4	82	23.56	3	PZ
Col-0	+3SD	4	83	43.95	2	CZ
Col-0	+3SD	4	84	34.77	3	PZ
Col-0	+3SD	4	85	31.62	4	PZ
Col-0	+3SD	4	89	38.8	4	PZ
Col-0	+3SD	4	90	47.28	5	PZ
Col-0	+3SD	4	92	46.64	6	NA
Col-0	+3SD	4	93	41.21	5	PZ
Col-0	+3SD	4	94	35.87	6	NA
Col-0	+3SD	4	95	23.99	5	PZ
Col-0	+3SD	4	96	24.29	5	PZ
Col-0	+3SD	4	97	28.72	4	PZ
Col-0	+3SD	4	98	42.39	3	PZ
Col-0	+3SD	4	100	33.77	1	CZ
Col-0	+3SD	4	101	38.18	3	PZ
Col-0	+3SD	4	109	21.97	5	PZ
Col-0	+3SD	4	111	44.64	6	NA
Col-0	+3SD	4	112	18.79	6	NA
Col-0	+3SD	4	456	12.9	2	CZ
Col-0	+3SD	4	459	40.62	3	PZ
Col-0	+3SD	4	460	22.34	3	PZ
Col-0	+3SD	4	461	42.64	4	PZ
Col-0	+3SD	4	466	22.99	4	PZ
Col-0	+3SD	4	467	39.01	4	PZ
Col-0	+3SD	4	471	35.41	4	PZ
Col-0	+3SD	4	473	32.49	5	PZ
Col-0	+3SD	5	163	45.21	0	CZ
Col-0	+3SD	5	164	46.12	1	CZ
Col-0	+3SD	5	165	29.55	2	CZ
Col-0	+3SD	5	166	22.77	3	PZ
Col-0	+3SD	5	172	38.3	4	PZ
Col-0	+3SD	5	173	25.13	3	PZ
Col-0	+3SD	5	174	39.43	2	CZ
Col-0	+3SD	5	175	39.69	2	CZ
Col-0	+3SD	5	176	32.58	2	CZ
Col-0	+3SD	5	177	28.23	1	CZ
Col-0	+3SD	5	178	25.51	1	CZ
Col-0	+3SD	5	180	36.43	1	CZ
Col-0	+3SD	5	181	38.35	1	CZ
Col-0	+3SD	5	185	35.11	2	CZ
Col-0	+3SD	5	198	27.32	3	PZ
Col-0	+3SD	5	199	26.93	2	CZ
Col-0	+3SD	5	202	51.08	5	PZ
Col-0	+3SD	5	204	38.59	3	PZ
Col-0	+3SD	5	205	35.38	3	PZ
Col-0	+3SD	5	206	59.22	4	PZ
Col-0	+3SD	5	207	31.07	5	PZ
Col-0	+3SD	5	208	28.44	5	PZ
Col-0	+3SD	5	209	43.47	5	PZ
Col-0	+3SD	5	210	21.51	4	PZ
Col-0	+3SD	5	211	36.28	4	PZ
Col-0	+3SD	5	212	23.38	3	PZ
Col-0	+3SD	5	213	51.9	3	PZ
Col-0	+3SD	5	219	31.59	2	CZ
Col-0	+3SD	5	221	25.92	3	PZ
Col-0	+3SD	5	222	28.65	3	PZ
Col-0	+3SD	5	225	41.55	3	PZ
Col-0	+3SD	5	226	38.15	3	PZ
Col-0	+3SD	5	236	32.82	4	PZ
Col-0	+3SD	5	237	21.33	4	PZ
Col-0	+3SD	5	239	45.43	4	PZ
Col-0	+3SD	5	240	28.62	3	PZ
Col-0	+3SD	5	242	17.94	3	PZ
Col-0	+3SD	5	243	27.75	4	PZ
Col-0	+3SD	5	244	42.13	4	PZ
Col-0	+3SD	5	245	45.46	4	PZ
Col-0	+3SD	5	246	40.83	3	PZ
Col-0	+3SD	5	247	21.49	4	PZ
Col-0	+3SD	5	249	39.86	5	PZ
Col-0	+3SD	5	260	33.32	2	CZ
Col-0	+3SD	5	271	35.92	3	PZ
Col-0	+3SD	5	272	35.27	4	PZ
Col-0	+3SD	5	276	37.99	3	PZ
Col-0	+3SD	5	278	33.01	3	PZ
Col-0	+3SD	5	280	25.69	3	PZ
Col-0	+3SD	5	281	42.02	2	CZ
Col-0	+3SD	5	285	40.78	1	CZ
Col-0	+3SD	5	287	20.33	1	CZ
Col-0	+3SD	5	288	30.33	1	CZ
Col-0	+3SD	5	289	44.24	2	CZ
Col-0	+3SD	5	291	44.95	3	PZ
Col-0	+3SD	5	292	46.3	2	CZ
Col-0	+3SD	5	293	31.97	2	CZ
Col-0	+3SD	5	296	63.89	4	PZ
Col-0	+3SD	5	297	39.19	5	PZ
Col-0	+3SD	5	298	50.79	5	PZ
Col-0	+3SD	5	301	37.34	5	PZ
Col-0	+3SD	5	302	30.17	5	PZ
Col-0	+3SD	5	3691	50.91	6	NA
Col-0	+3SD	5	3692	38.18	6	NA
Col-0	+3SD	6	273	47.03	1	CZ
Col-0	+3SD	6	274	23.91	2	CZ
Col-0	+3SD	6	275	26.07	2	CZ
Col-0	+3SD	6	276	40.49	3	PZ
Col-0	+3SD	6	277	28.83	3	PZ
Col-0	+3SD	6	278	32.58	4	PZ
Col-0	+3SD	6	279	49.19	4	PZ
Col-0	+3SD	6	280	33.26	4	PZ
Col-0	+3SD	6	281	36.34	3	PZ
Col-0	+3SD	6	282	25.99	2	CZ
Col-0	+3SD	6	283	32.73	3	PZ
Col-0	+3SD	6	284	35.73	4	PZ
Col-0	+3SD	6	285	27.92	5	PZ
Col-0	+3SD	6	286	37.45	5	PZ
Col-0	+3SD	6	287	28.91	4	PZ
Col-0	+3SD	6	288	26.61	5	PZ
Col-0	+3SD	6	289	58.39	6	NA
Col-0	+3SD	6	291	37.95	5	PZ
Col-0	+3SD	6	292	37.13	4	PZ
Col-0	+3SD	6	295	48.2	7	NA
Col-0	+3SD	6	296	47.25	6	NA
Col-0	+3SD	6	297	26.74	5	PZ
Col-0	+3SD	6	298	39.77	4	PZ
Col-0	+3SD	6	299	36.28	3	PZ
Col-0	+3SD	6	300	45.5	2	CZ
Col-0	+3SD	6	301	35.58	1	CZ
Col-0	+3SD	6	302	26.87	0	CZ
Col-0	+3SD	6	303	27.78	1	CZ
Col-0	+3SD	6	304	38.19	2	CZ
Col-0	+3SD	6	305	29.06	1	CZ
Col-0	+3SD	6	306	50.02	1	CZ
Col-0	+3SD	6	307	18.64	4	PZ
Col-0	+3SD	6	308	31.79	5	PZ
Col-0	+3SD	6	309	36.39	6	NA
Col-0	+3SD	6	311	33.09	5	PZ
Col-0	+3SD	6	314	31.89	5	PZ
Col-0	+3SD	6	315	19.42	4	PZ
Col-0	+3SD	6	316	45.05	3	PZ
Col-0	+3SD	6	317	34.38	2	CZ
Col-0	+3SD	6	318	35	2	CZ
Col-0	+3SD	6	319	32.23	3	PZ
Col-0	+3SD	6	320	19.35	4	PZ
Col-0	+3SD	6	321	39.65	4	PZ
Col-0	+3SD	6	330	29.4	7	NA
Col-0	+3SD	6	332	22.91	5	PZ
Col-0	+3SD	6	333	45.99	4	PZ
Col-0	+3SD	6	334	45.24	3	PZ
Col-0	+3SD	6	335	33.17	2	CZ
Col-0	+3SD	6	336	25.22	3	PZ
Col-0	+3SD	6	337	46.75	4	PZ
Col-0	+3SD	6	338	43.47	3	PZ
Col-0	+3SD	6	339	11.98	2	CZ
Col-0	+3SD	6	340	33.1	2	CZ
Col-0	+3SD	6	341	39.04	3	PZ
Col-0	+3SD	6	342	30.73	4	PZ
Col-0	+3SD	6	343	46.84	4	PZ
Col-0	+3SD	6	345	35.98	3	PZ
Col-0	+3SD	6	346	18.99	2	CZ
Col-0	+3SD	6	347	24.46	4	PZ
Col-0	+3SD	6	348	26.05	5	PZ
Col-0	+3SD	6	349	26.77	5	PZ
Col-0	+3SD	6	350	38	6	NA
Col-0	+3SD	6	352	43.72	5	PZ
Col-0	+3SD	6	358	30.48	4	PZ
Col-0	+3SD	6	359	37.04	4	PZ
Col-0	+3SD	6	360	17	4	PZ
Col-0	+3SD	6	361	41.57	5	PZ
Col-0	+3SD	6	362	42.03	5	PZ
Col-0	+3SD	6	373	29.44	6	NA
Col-0	+3SD	6	374	43.31	5	PZ
Col-0	+3SD	6	375	16.41	5	PZ
Col-0	+3SD	6	376	34.34	5	PZ
Col-0	+3SD	6	380	55.33	6	NA
Col-0	+3SD	6	381	23.08	5	PZ
Col-0	+3SD	6	417	31.78	8	NA
Col-0	+3SD	6	419	42.55	9	NA
Col-0	+3SD	6	433	76.14	7	NA
Col-0	+3SD	6	434	32.87	7	NA
Col-0	+3SD	6	435	36.2	6	NA
Col-0	+3SD	6	436	21.43	6	NA
Col-0	+3SD	6	437	33.24	5	PZ
Col-0	+3SD	6	438	32.57	5	PZ
Col-0	+3SD	6	439	33.06	6	NA
Col-0	+3SD	6	440	30.85	7	NA
Col-0	+3SD	6	441	68.42	7	NA
Col-0	+3SD	6	442	58.73	8	NA
Col-0	+3SD	6	443	55.76	8	NA
Col-0	+3SD	6	445	39.05	3	PZ
Col-0	+3SD	6	446	45.01	4	PZ
Col-0	+5LD	4	10	47.14	6	NA
Col-0	+5LD	4	18	38.22	6	NA
Col-0	+5LD	4	25	57.04	7	NA
Col-0	+5LD	4	26	55.82	1	CZ
Col-0	+5LD	4	27	34.4	10	NA
Col-0	+5LD	4	29	52.17	3	PZ
Col-0	+5LD	4	36	53.21	9	NA
Col-0	+5LD	4	39	44.33	13	NA
Col-0	+5LD	4	41	67.53	7	NA
Col-0	+5LD	4	42	41.43	14	NA
Col-0	+5LD	4	46	75.63	12	NA
Col-0	+5LD	4	47	82.77	6	NA
Col-0	+5LD	4	49	63.01	12	NA
Col-0	+5LD	4	50	51.34	8	NA
Col-0	+5LD	4	53	54.48	9	NA
Col-0	+5LD	4	56	58.37	8	NA
Col-0	+5LD	4	62	71.17	6	NA
Col-0	+5LD	4	63	81.68	5	PZ
Col-0	+5LD	4	64	81.08	4	PZ
Col-0	+5LD	4	66	75.48	5	PZ
Col-0	+5LD	4	67	34.66	10	NA
Col-0	+5LD	4	69	50.1	14	NA
Col-0	+5LD	4	71	30.2	9	NA
Col-0	+5LD	4	75	43.06	3	PZ
Col-0	+5LD	4	76	30.99	12	NA
Col-0	+5LD	4	80	50.12	8	NA
Col-0	+5LD	4	81	37.37	11	NA
Col-0	+5LD	4	87	35.29	4	PZ
Col-0	+5LD	4	89	55.5	3	PZ
Col-0	+5LD	4	95	46.96	11	NA
Col-0	+5LD	4	97	56.79	14	NA
Col-0	+5LD	4	98	38.2	14	NA
Col-0	+5LD	4	99	31.97	9	NA
Col-0	+5LD	4	101	77.72	13	NA
Col-0	+5LD	4	104	65.55	14	NA
Col-0	+5LD	4	106	69.39	10	NA
Col-0	+5LD	4	111	31.29	10	NA
Col-0	+5LD	4	112	42.67	9	NA
Col-0	+5LD	4	113	46.77	10	NA
Col-0	+5LD	4	114	55.07	8	NA
Col-0	+5LD	4	116	37.13	5	PZ
Col-0	+5LD	4	117	51.63	8	NA
Col-0	+5LD	4	119	41.71	9	NA
Col-0	+5LD	4	120	66.45	7	NA
Col-0	+5LD	4	121	64.77	7	NA
Col-0	+5LD	4	122	53.87	11	NA
Col-0	+5LD	4	133	28.57	4	PZ
Col-0	+5LD	4	135	47.27	8	NA
Col-0	+5LD	4	138	36.44	10	NA
Col-0	+5LD	4	140	65.96	8	NA
Col-0	+5LD	4	141	24.7	10	NA
Col-0	+5LD	4	142	64.57	10	NA
Col-0	+5LD	4	144	87.25	3	PZ
Col-0	+5LD	4	148	35.66	2	CZ
Col-0	+5LD	4	155	35.38	2	CZ
Col-0	+5LD	4	156	30.03	10	NA
Col-0	+5LD	4	157	42.32	10	NA
Col-0	+5LD	4	159	49.64	10	NA
Col-0	+5LD	4	162	48.26	7	NA
Col-0	+5LD	4	163	30.08	10	NA
Col-0	+5LD	4	165	61.72	7	NA
Col-0	+5LD	4	167	57.78	2	CZ
Col-0	+5LD	4	170	40.08	2	CZ
Col-0	+5LD	4	171	46.57	7	NA
Col-0	+5LD	4	172	48.41	10	NA
Col-0	+5LD	4	178	37.22	3	PZ
Col-0	+5LD	4	180	64.66	3	PZ
Col-0	+5LD	4	184	49.09	9	NA
Col-0	+5LD	4	186	51.53	12	NA
Col-0	+5LD	4	190	67.32	12	NA
Col-0	+5LD	4	191	33.89	13	NA
Col-0	+5LD	4	192	41.61	14	NA
Col-0	+5LD	4	196	53.99	11	NA
Col-0	+5LD	4	197	62.2	13	NA
Col-0	+5LD	4	198	69.57	5	PZ
Col-0	+5LD	4	203	38.84	10	NA
Col-0	+5LD	4	204	76.64	11	NA
Col-0	+5LD	4	206	54.79	6	NA
Col-0	+5LD	4	208	31.05	9	NA
Col-0	+5LD	4	210	37.58	6	NA
Col-0	+5LD	4	211	62.92	7	NA
Col-0	+5LD	4	212	44.88	8	NA
Col-0	+5LD	4	214	31.99	6	NA
Col-0	+5LD	4	217	47.02	6	NA
Col-0	+5LD	4	219	54.69	7	NA
Col-0	+5LD	4	220	44.03	5	PZ
Col-0	+5LD	4	224	43.15	4	PZ
Col-0	+5LD	4	225	39.59	9	NA
Col-0	+5LD	4	227	53.4	4	PZ
Col-0	+5LD	4	230	76.85	7	NA
Col-0	+5LD	4	231	41.14	9	NA
Col-0	+5LD	4	233	70.59	8	NA
Col-0	+5LD	4	236	46.06	8	NA
Col-0	+5LD	4	237	36.1	6	NA
Col-0	+5LD	4	238	67.99	9	NA
Col-0	+5LD	4	241	48.67	4	PZ
Col-0	+5LD	4	247	65.7	1	CZ
Col-0	+5LD	4	249	61.41	2	CZ
Col-0	+5LD	4	254	34.35	11	NA
Col-0	+5LD	4	256	42.73	3	PZ
Col-0	+5LD	4	257	55.86	8	NA
Col-0	+5LD	4	258	49.62	9	NA
Col-0	+5LD	4	260	46.73	8	NA
Col-0	+5LD	4	262	27.99	12	NA
Col-0	+5LD	4	265	33.77	11	NA
Col-0	+5LD	4	266	36.64	12	NA
Col-0	+5LD	4	270	50.91	2	CZ
Col-0	+5LD	4	276	64.8	7	NA
Col-0	+5LD	4	278	35.91	8	NA
Col-0	+5LD	4	287	42.54	10	NA
Col-0	+5LD	4	290	47.4	9	NA
Col-0	+5LD	4	291	67.38	8	NA
Col-0	+5LD	4	298	77.09	4	PZ
Col-0	+5LD	4	301	53.27	3	PZ
Col-0	+5LD	4	306	53.21	5	PZ
Col-0	+5LD	4	307	71.15	6	NA
Col-0	+5LD	4	308	41.45	8	NA
Col-0	+5LD	4	311	56.36	10	NA
Col-0	+5LD	4	327	63.09	14	NA
Col-0	+5LD	4	329	41.11	3	PZ
Col-0	+5LD	4	331	50.88	4	PZ
Col-0	+5LD	4	332	27.01	12	NA
Col-0	+5LD	4	333	30.54	4	PZ
Col-0	+5LD	4	334	41	12	NA
Col-0	+5LD	4	335	34.15	7	NA
Col-0	+5LD	4	336	39.23	13	NA
Col-0	+5LD	4	341	75.45	13	NA
Col-0	+5LD	4	350	59.46	13	NA
Col-0	+5LD	4	353	39.05	5	PZ
Col-0	+5LD	4	354	42.44	5	PZ
Col-0	+5LD	4	358	30.21	8	NA
Col-0	+5LD	4	361	55.23	13	NA
Col-0	+5LD	4	362	49.51	12	NA
Col-0	+5LD	4	363	64.77	11	NA
Col-0	+5LD	4	373	29.47	11	NA
Col-0	+5LD	4	375	72.86	11	NA
Col-0	+5LD	4	378	73.32	13	NA
Col-0	+5LD	4	381	46.22	4	PZ
Col-0	+5LD	4	384	30.45	6	NA
Col-0	+5LD	4	387	51.82	7	NA
Col-0	+5LD	4	388	50.12	10	NA
Col-0	+5LD	4	389	32.99	10	NA
Col-0	+5LD	4	390	62.16	10	NA
Col-0	+5LD	4	391	62.94	11	NA
Col-0	+5LD	4	403	58.19	12	NA
Col-0	+5LD	4	404	48.47	11	NA
Col-0	+5LD	4	405	62.49	9	NA
Col-0	+5LD	4	406	71.99	9	NA
Col-0	+5LD	4	407	73.63	12	NA
Col-0	+5LD	4	408	35.94	13	NA
Col-0	+5LD	4	410	38.19	6	NA
Col-0	+5LD	4	412	64.52	5	PZ
Col-0	+5LD	4	417	65.74	5	PZ
Col-0	+5LD	4	418	41.17	6	NA
Col-0	+5LD	4	419	42.23	8	NA
Col-0	+5LD	4	420	50.99	10	NA
Col-0	+5LD	4	428	36.47	11	NA
Col-0	+5LD	4	429	62.94	9	NA
Col-0	+5LD	4	433	32.96	9	NA
Col-0	+5LD	4	435	69.8	11	NA
Col-0	+5LD	4	444	49.63	10	NA
Col-0	+5LD	4	445	53.14	8	NA
Col-0	+5LD	4	446	63.26	7	NA
Col-0	+5LD	4	447	50.48	9	NA
Col-0	+5LD	4	450	41.25	11	NA
Col-0	+5LD	4	454	57.14	9	NA
Col-0	+5LD	4	455	61.58	7	NA
Col-0	+5LD	4	456	51.68	7	NA
Col-0	+5LD	4	467	40.26	9	NA
Col-0	+5LD	4	468	61.04	8	NA
Col-0	+5LD	4	469	50.5	7	NA
Col-0	+5LD	4	470	47.17	6	NA
Col-0	+5LD	4	471	54.35	6	NA
Col-0	+5LD	4	472	60.79	6	NA
Col-0	+5LD	4	474	56.71	7	NA
Col-0	+5LD	4	475	38.35	8	NA
Col-0	+5LD	4	484	33.61	8	NA
Col-0	+5LD	4	487	42.19	9	NA
Col-0	+5LD	4	488	39.96	7	NA
Col-0	+5LD	4	492	44.35	9	NA
Col-0	+5LD	4	493	60.15	9	NA
Col-0	+5LD	4	500	61.28	9	NA
Col-0	+5LD	4	502	49.6	5	PZ
Col-0	+5LD	4	504	64.49	5	PZ
Col-0	+5LD	4	506	50.22	7	NA
Col-0	+5LD	4	509	73.6	8	NA
Col-0	+5LD	4	512	52.18	6	NA
Col-0	+5LD	4	513	75.79	7	NA
Col-0	+5LD	4	515	49.83	7	NA
Col-0	+5LD	4	516	66.43	6	NA
Col-0	+5LD	4	518	61.25	8	NA
Col-0	+5LD	4	519	32.19	9	NA
Col-0	+5LD	4	526	29.82	8	NA
Col-0	+5LD	4	527	82.21	5	PZ
Col-0	+5LD	4	528	68	4	PZ
Col-0	+5LD	4	535	44.18	6	NA
Col-0	+5LD	4	536	40.19	5	PZ
Col-0	+5LD	4	537	40.38	5	PZ
Col-0	+5LD	4	538	43.22	7	NA
Col-0	+5LD	4	542	43.87	8	NA
Col-0	+5LD	4	544	39.13	9	NA
Col-0	+5LD	4	545	49.17	8	NA
Col-0	+5LD	4	546	51.14	5	PZ
Col-0	+5LD	4	547	31.57	4	PZ
Col-0	+5LD	4	549	52.67	6	NA
Col-0	+5LD	4	559	62.42	6	NA
Col-0	+5LD	4	560	35.01	4	PZ
Col-0	+5LD	4	568	40.91	14	NA
Col-0	+5LD	4	575	39.28	8	NA
Col-0	+5LD	4	576	37.76	8	NA
Col-0	+5LD	4	577	70.01	4	PZ
Col-0	+5LD	4	578	61.42	3	PZ
Col-0	+5LD	4	579	45.6	14	NA
Col-0	+5LD	4	581	57.97	3	PZ
Col-0	+5LD	4	582	35.55	14	NA
Col-0	+5LD	4	583	23.97	10	NA
Col-0	+5LD	4	584	75.75	5	PZ
Col-0	+5LD	4	585	62.43	6	NA
Col-0	+5LD	4	594	33.47	11	NA
Col-0	+5LD	4	595	54.17	9	NA
Col-0	+5LD	4	597	40.86	2	CZ
Col-0	+5LD	4	598	48.83	2	CZ
Col-0	+5LD	4	599	61.42	5	PZ
Col-0	+5LD	4	600	35.82	9	NA
Col-0	+5LD	4	602	31.84	9	NA
Col-0	+5LD	4	604	79.63	9	NA
Col-0	+5LD	4	605	47.11	8	NA
Col-0	+5LD	4	607	49.1	2	CZ
Col-0	+5LD	4	608	49.93	1	CZ
Col-0	+5LD	4	611	66.19	11	NA
Col-0	+5LD	4	614	73.97	4	PZ
Col-0	+5LD	4	617	77.48	7	NA
Col-0	+5LD	4	618	50.2	6	NA
Col-0	+5LD	4	620	64.37	3	PZ
Col-0	+5LD	4	621	30.49	10	NA
Col-0	+5LD	4	622	63.22	10	NA
Col-0	+5LD	4	623	59	12	NA
Col-0	+5LD	4	624	85.95	8	NA
Col-0	+5LD	4	625	39.23	9	NA
Col-0	+5LD	4	628	34.27	11	NA
Col-0	+5LD	4	629	35.46	9	NA
Col-0	+5LD	4	631	56.01	0	CZ
Col-0	+5LD	4	633	50.54	3	PZ
Col-0	+5LD	4	635	52.5	4	PZ
Col-0	+5LD	4	636	43.57	6	NA
Col-0	+5LD	4	644	88.9	6	NA
Col-0	+5LD	4	646	45.53	4	PZ
Col-0	+5LD	4	649	33.49	1	CZ
Col-0	+5LD	4	655	46.3	10	NA
Col-0	+5LD	4	656	28.38	11	NA
Col-0	+5LD	4	657	28.4	10	NA
Col-0	+5LD	4	658	43.75	9	NA
Col-0	+5LD	4	659	33.2	11	NA
Col-0	+5LD	4	660	43.85	7	NA
Col-0	+5LD	4	661	77.06	5	PZ
Col-0	+5LD	4	670	54.89	2	CZ
Col-0	+5LD	4	677	42.84	10	NA
Col-0	+5LD	4	678	67.18	5	PZ
Col-0	+5LD	4	680	37.29	3	PZ
Col-0	+5LD	4	681	43.28	5	PZ
Col-0	+5LD	4	682	48.73	6	NA
Col-0	+5LD	4	683	43.84	11	NA
Col-0	+5LD	4	684	79.66	9	NA
Col-0	+5LD	4	685	21.5	11	NA
Col-0	+5LD	4	694	53.95	6	NA
Col-0	+5LD	4	697	65.88	5	PZ
Col-0	+5LD	4	700	70.44	3	PZ
Col-0	+5LD	4	703	65.74	7	NA
Col-0	+5LD	4	704	38.65	4	PZ
Col-0	+5LD	4	710	37.36	12	NA
Col-0	+5LD	4	714	47.55	6	NA
Col-0	+5LD	4	715	41.18	11	NA
Col-0	+5LD	4	716	41.6	5	PZ
Col-0	+5LD	4	718	40.15	15	NA
Col-0	+5LD	4	723	57.42	13	NA
Col-0	+5LD	4	725	153.15	15	NA
Col-0	+5LD	4	730	68.83	8	NA
Col-0	+5LD	4	731	52.83	12	NA
Col-0	+5LD	4	732	52.41	12	NA
Col-0	+5LD	4	733	60.4	4	PZ
Col-0	+5LD	4	742	27.89	11	NA
Col-0	+5LD	4	751	81.49	12	NA
Col-0	+5LD	4	752	49.15	10	NA
Col-0	+5LD	4	753	65.41	10	NA
Col-0	+5LD	4	755	48.09	4	PZ
Col-0	+5LD	4	761	55.32	11	NA
Col-0	+5LD	4	763	41.55	10	NA
Col-0	+5LD	4	764	72.48	9	NA
Col-0	+5LD	4	768	37.29	10	NA
Col-0	+5LD	4	769	44.66	12	NA
Col-0	+5LD	4	771	82.38	13	NA
Col-0	+5LD	4	773	60.16	13	NA
Col-0	+5LD	4	774	67.98	5	PZ
Col-0	+5LD	4	775	38.12	13	NA
Col-0	+5LD	4	777	45.17	11	NA
Col-0	+5LD	4	778	55.28	10	NA
Col-0	+5LD	4	780	50.83	7	NA
Col-0	+5LD	4	781	34.29	12	NA
Col-0	+5LD	4	786	44	11	NA
Col-0	+5LD	4	790	51.36	9	NA
Col-0	+5LD	4	792	79.49	8	NA
Col-0	+5LD	4	793	27.7	6	NA
Col-0	+5LD	4	794	80.12	7	NA
Col-0	+5LD	4	795	60	8	NA
Col-0	+5LD	4	796	61.74	10	NA
Col-0	+5LD	4	799	66.53	12	NA
Col-0	+5LD	4	806	61.36	10	NA
Col-0	+5LD	4	813	34.25	7	NA
Col-0	+5LD	4	815	31.7	7	NA
Col-0	+5LD	4	819	33	8	NA
Col-0	+5LD	4	820	46.42	6	NA
Col-0	+5LD	4	821	41.41	13	NA
Col-0	+5LD	4	822	62.46	9	NA
Col-0	+5LD	4	826	73.3	8	NA
Col-0	+5LD	4	828	41.95	6	NA
Col-0	+5LD	4	829	65.38	5	PZ
Col-0	+5LD	4	830	48.01	8	NA
Col-0	+5LD	4	834	34.18	7	NA
Col-0	+5LD	4	837	62.92	6	NA
Col-0	+5LD	4	838	40.45	7	NA
Col-0	+5LD	4	839	48.73	6	NA
Col-0	+5LD	4	840	48.96	7	NA
Col-0	+5LD	4	841	54.48	8	NA
Col-0	+5LD	4	842	47.72	9	NA
Col-0	+5LD	4	848	84.71	7	NA
Col-0	+5LD	4	849	29.52	9	NA
Col-0	+5LD	4	852	61.77	7	NA
Col-0	+5LD	4	853	32.64	6	NA
Col-0	+5LD	4	854	55.41	7	NA
Col-0	+5LD	4	856	51.89	8	NA
Col-0	+5LD	4	858	55.69	4	PZ
Col-0	+5LD	4	860	30.48	7	NA
Col-0	+5LD	4	866	79.79	3	PZ
Col-0	+5LD	4	867	59.6	9	NA
Col-0	+5LD	4	869	37.76	8	NA
Col-0	+5LD	4	870	41.54	5	PZ
Col-0	+5LD	4	871	45.3	8	NA
Col-0	+5LD	4	872	35.91	9	NA
Col-0	+5LD	4	873	58.72	4	PZ
Col-0	+5LD	4	875	35.82	11	NA
Col-0	+5LD	4	879	66.21	6	NA
Col-0	+5LD	4	881	34.91	5	PZ
Col-0	+5LD	4	882	63.56	3	PZ
Col-0	+5LD	4	883	47.65	2	CZ
Col-0	+5LD	4	884	52.54	7	NA
Col-0	+5LD	4	889	62.22	7	NA
Col-0	+5LD	4	891	37.52	4	PZ
Col-0	+5LD	4	892	60.33	9	NA
Col-0	+5LD	4	893	67.9	6	NA
Col-0	+5LD	4	896	61.61	11	NA
Col-0	+5LD	4	898	55	10	NA
Col-0	+5LD	4	900	77.99	5	PZ
Col-0	+5LD	4	902	58.44	5	PZ
Col-0	+5LD	4	907	54.47	10	NA
Col-0	+5LD	4	908	75.67	8	NA
Col-0	+5LD	4	909	28.32	9	NA
Col-0	+5LD	4	910	39.34	9	NA
Col-0	+5LD	4	911	60.15	4	PZ
Col-0	+5LD	4	912	36.05	11	NA
Col-0	+5LD	4	918	49.19	5	PZ
Col-0	+5LD	4	919	61.78	2	CZ
Col-0	+5LD	4	920	48.15	9	NA
Col-0	+5LD	4	924	46.61	10	NA
Col-0	+5LD	4	926	45.35	11	NA
Col-0	+5LD	4	927	62.83	9	NA
Col-0	+5LD	4	928	27.67	2	CZ
Col-0	+5LD	4	929	45.37	1	CZ
Col-0	+5LD	4	930	69.64	13	NA
Col-0	+5LD	4	932	45.21	6	NA
Col-0	+5LD	4	934	52.35	4	PZ
Col-0	+5LD	4	936	69.53	11	NA
Col-0	+5LD	4	937	80.96	4	PZ
Col-0	+5LD	4	938	64.06	3	PZ
Col-0	+5LD	4	940	75.55	1	CZ
Col-0	+5LD	4	941	34.58	3	PZ
Col-0	+5LD	4	942	38.46	10	NA
Col-0	+5LD	4	953	36.35	11	NA
Col-0	+5LD	4	981	54.96	7	NA
Col-0	+5LD	4	1014	55.75	8	NA
Col-0	+5LD	4	1015	36.94	9	NA
Col-0	+5LD	4	1016	45.3	10	NA
Col-0	+5LD	4	1017	30.01	11	NA
Col-0	+5LD	4	1019	39.04	12	NA
Col-0	+5LD	4	1020	43.26	12	NA
Col-0	+5LD	4	1021	36.93	13	NA
Col-0	+5LD	4	1022	31.85	13	NA
Col-0	+5LD	4	1023	59.32	12	NA
Col-0	+5LD	4	1024	49.08	11	NA
Col-0	+5LD	4	1025	26.48	10	NA
Col-0	+5LD	4	1038	45.61	12	NA
Col-0	+5LD	4	1039	26.74	12	NA
Col-0	+5LD	5	1	73.78	0	CZ
Col-0	+5LD	5	2	38.64	1	CZ
Col-0	+5LD	5	3	39.76	2	CZ
Col-0	+5LD	5	4	57.28	2	CZ
Col-0	+5LD	5	5	44.43	1	CZ
Col-0	+5LD	5	6	57.6	1	CZ
Col-0	+5LD	5	7	44.43	2	CZ
Col-0	+5LD	5	8	44.79	3	PZ
Col-0	+5LD	5	9	46.13	3	PZ
Col-0	+5LD	5	10	53.04	2	CZ
Col-0	+5LD	5	11	56.17	3	PZ
Col-0	+5LD	5	12	62.55	3	PZ
Col-0	+5LD	5	13	40.36	4	PZ
Col-0	+5LD	5	14	57.06	3	PZ
Col-0	+5LD	5	15	39.18	5	PZ
Col-0	+5LD	5	16	28.97	4	PZ
Col-0	+5LD	5	17	70.45	4	PZ
Col-0	+5LD	5	18	82.5	3	PZ
Col-0	+5LD	5	19	30.84	2	CZ
Col-0	+5LD	5	20	66.01	1	CZ
Col-0	+5LD	5	21	38.38	1	CZ
Col-0	+5LD	5	22	34.37	1	CZ
Col-0	+5LD	5	23	30.03	1	CZ
Col-0	+5LD	5	24	46.35	2	CZ
Col-0	+5LD	5	25	45.26	2	CZ
Col-0	+5LD	5	26	38.62	2	CZ
Col-0	+5LD	5	27	64.2	3	PZ
Col-0	+5LD	5	28	66.34	2	CZ
Col-0	+5LD	5	30	48.51	2	CZ
Col-0	+5LD	5	31	55.71	2	CZ
Col-0	+5LD	5	32	55.06	3	PZ
Col-0	+5LD	5	33	54.75	4	PZ
Col-0	+5LD	5	34	37.28	4	PZ
Col-0	+5LD	5	35	54.56	3	PZ
Col-0	+5LD	5	36	51.26	4	PZ
Col-0	+5LD	5	37	38.99	5	PZ
Col-0	+5LD	5	38	44.97	5	PZ
Col-0	+5LD	5	39	68.74	5	PZ
Col-0	+5LD	5	40	35.58	6	NA
Col-0	+5LD	5	41	63.77	6	NA
Col-0	+5LD	5	42	56.23	5	PZ
Col-0	+5LD	5	43	72.06	6	NA
Col-0	+5LD	5	44	66.41	6	NA
Col-0	+5LD	5	45	41.02	5	PZ
Col-0	+5LD	5	46	58.61	4	PZ
Col-0	+5LD	5	47	78.82	6	NA
Col-0	+5LD	5	48	55.96	6	NA
Col-0	+5LD	5	49	68.5	7	NA
Col-0	+5LD	5	50	54.51	7	NA
Col-0	+5LD	5	51	45.04	7	NA
Col-0	+5LD	5	52	46.75	6	NA
Col-0	+5LD	5	53	68.26	7	NA
Col-0	+5LD	5	54	61.22	6	NA
Col-0	+5LD	5	55	61.39	5	PZ
Col-0	+5LD	5	56	88.75	5	PZ
Col-0	+5LD	5	57	99.47	6	NA
Col-0	+5LD	5	58	100.64	5	PZ
Col-0	+5LD	5	59	86.66	4	PZ
Col-0	+5LD	5	60	55.32	4	PZ
Col-0	+5LD	5	61	73.38	3	PZ
Col-0	+5LD	5	62	66.58	4	PZ
Col-0	+5LD	5	63	51.96	5	PZ
Col-0	+5LD	5	64	43.1	5	PZ
Col-0	+5LD	5	65	38.17	6	NA
Col-0	+5LD	5	66	29.55	6	NA
Col-0	+5LD	5	67	64.83	5	PZ
Col-0	+5LD	5	68	30.87	6	NA
Col-0	+5LD	5	69	60.66	5	PZ
Col-0	+5LD	5	70	36.27	5	PZ
Col-0	+5LD	5	71	68.46	4	PZ
Col-0	+5LD	5	73	32.45	4	PZ
Col-0	+5LD	5	74	69.9	4	PZ
Col-0	+5LD	5	75	66.6	4	PZ
Col-0	+5LD	5	76	41.92	3	PZ
Col-0	+5LD	5	77	48.63	3	PZ
Col-0	+5LD	5	78	32.88	4	PZ
Col-0	+5LD	5	79	44.77	5	PZ
Col-0	+5LD	5	80	42.88	3	PZ
Col-0	+5LD	5	81	57.88	3	PZ
Col-0	+5LD	5	82	78.27	4	PZ
Col-0	+5LD	5	83	64.37	5	PZ
Col-0	+5LD	5	84	67.24	4	PZ
Col-0	+5LD	5	85	70.53	3	PZ
Col-0	+5LD	5	86	39.06	2	CZ
Col-0	+5LD	5	87	45.01	4	PZ
Col-0	+5LD	5	88	76	4	PZ
Col-0	+5LD	5	89	52.79	5	PZ
Col-0	+5LD	5	90	63.13	5	PZ
Col-0	+5LD	5	91	42.19	6	NA
Col-0	+5LD	5	92	34.14	4	PZ
Col-0	+5LD	5	93	46.49	5	PZ
Col-0	+5LD	5	94	42.03	4	PZ
Col-0	+5LD	5	95	42.53	5	PZ
Col-0	+5LD	5	96	39.79	4	PZ
Col-0	+5LD	5	98	30.06	4	PZ
Col-0	+5LD	5	99	52.57	5	PZ
Col-0	+5LD	5	100	78.38	6	NA
Col-0	+5LD	5	101	55.38	6	NA
Col-0	+5LD	5	102	41.74	6	NA
Col-0	+5LD	5	103	61.29	6	NA
Col-0	+5LD	5	105	64.97	7	NA
Col-0	+5LD	5	106	34.36	5	PZ
Col-0	+5LD	5	107	56.21	6	NA
Col-0	+5LD	5	108	64.89	7	NA
Col-0	+5LD	5	109	73.59	7	NA
Col-0	+5LD	5	110	50.09	6	NA
Col-0	+5LD	5	111	48.31	5	PZ
Col-0	+5LD	5	112	48.13	6	NA
Col-0	+5LD	5	113	60.37	6	NA
Col-0	+5LD	5	114	52.82	7	NA
Col-0	+5LD	5	115	76.25	7	NA
Col-0	+5LD	5	116	46.22	6	NA
Col-0	+5LD	5	117	37.81	7	NA
Col-0	+5LD	5	118	51.42	7	NA
Col-0	+5LD	5	119	24.61	8	NA
Col-0	+5LD	5	120	44.07	8	NA
Col-0	+5LD	5	121	67.38	8	NA
Col-0	+5LD	5	122	60.88	7	NA
Col-0	+5LD	5	123	42.36	8	NA
Col-0	+5LD	5	124	41.24	8	NA
Col-0	+5LD	5	125	44.36	8	NA
Col-0	+5LD	5	126	39.41	7	NA
Col-0	+5LD	5	127	37.32	8	NA
Col-0	+5LD	5	130	40.84	7	NA
Col-0	+5LD	5	131	33.54	7	NA
Col-0	+5LD	5	132	44.71	7	NA
Col-0	+5LD	5	133	63.48	7	NA
Col-0	+5LD	5	136	65.49	8	NA
Col-0	+5LD	5	137	45.34	8	NA
Col-0	+5LD	5	138	62.03	9	NA
Col-0	+5LD	5	139	85.58	8	NA
Col-0	+5LD	5	140	50.6	9	NA
Col-0	+5LD	5	141	32.42	9	NA
Col-0	+5LD	5	142	45.07	10	NA
Col-0	+5LD	5	143	38.76	10	NA
Col-0	+5LD	5	144	44.22	10	NA
Col-0	+5LD	5	145	41.31	9	NA
Col-0	+5LD	5	146	41.86	9	NA
Col-0	+5LD	5	147	29.59	9	NA
Col-0	+5LD	5	148	34.36	10	NA
Col-0	+5LD	5	149	61.96	10	NA
Col-0	+5LD	5	150	67.65	9	NA
Col-0	+5LD	5	151	59.9	8	NA
Col-0	+5LD	5	152	54.68	9	NA
Col-0	+5LD	5	153	24.72	10	NA
Col-0	+5LD	5	154	45.43	10	NA
Col-0	+5LD	5	155	39.65	11	NA
Col-0	+5LD	5	156	72.31	10	NA
Col-0	+5LD	5	157	51.57	11	NA
Col-0	+5LD	5	162	57.19	11	NA
Col-0	+5LD	5	163	62.13	10	NA
Col-0	+5LD	5	164	66.84	11	NA
Col-0	+5LD	5	167	62.49	9	NA
Col-0	+5LD	5	168	36.64	9	NA
Col-0	+5LD	5	169	40.33	10	NA
Col-0	+5LD	5	170	36.61	11	NA
Col-0	+5LD	5	171	42.24	12	NA
Col-0	+5LD	5	172	31.04	9	NA
Col-0	+5LD	5	173	62.43	9	NA
Col-0	+5LD	5	174	36.87	10	NA
Col-0	+5LD	5	175	35.05	11	NA
Col-0	+5LD	5	176	62.24	11	NA
Col-0	+5LD	5	177	35.62	12	NA
Col-0	+5LD	5	178	45.8	12	NA
Col-0	+5LD	5	179	70.26	12	NA
Col-0	+5LD	5	180	57.25	13	NA
Col-0	+5LD	5	181	40.11	11	NA
Col-0	+5LD	5	182	45.61	10	NA
Col-0	+5LD	5	183	67.01	10	NA
Col-0	+5LD	5	184	37.39	9	NA
Col-0	+5LD	5	185	20.62	9	NA
Col-0	+5LD	5	186	61.52	8	NA
Col-0	+5LD	5	187	43.7	8	NA
Col-0	+5LD	5	188	51.59	8	NA
Col-0	+5LD	5	189	41.25	10	NA
Col-0	+5LD	5	190	64.97	11	NA
Col-0	+5LD	5	191	52.85	12	NA
Col-0	+5LD	5	192	34.67	13	NA
Col-0	+5LD	5	193	40.79	12	NA
Col-0	+5LD	5	195	72.91	11	NA
Col-0	+5LD	5	196	54.35	10	NA
Col-0	+5LD	5	197	52.18	9	NA
Col-0	+5LD	5	198	31.86	9	NA
Col-0	+5LD	5	199	42.74	10	NA
Col-0	+5LD	5	200	81.29	7	NA
Col-0	+5LD	5	201	73.5	6	NA
Col-0	+5LD	5	202	39.45	7	NA
Col-0	+5LD	5	203	45.65	8	NA
Col-0	+5LD	5	204	43.45	9	NA
Col-0	+5LD	5	205	39.13	10	NA
Col-0	+5LD	5	206	26.41	11	NA
Col-0	+5LD	5	207	64.43	11	NA
Col-0	+5LD	5	213	66.08	10	NA
Col-0	+5LD	5	214	57.86	9	NA
Col-0	+5LD	5	215	62.84	8	NA
Col-0	+5LD	5	216	49.02	6	NA
Col-0	+5LD	5	217	63.35	7	NA
Col-0	+5LD	5	218	34.52	8	NA
Col-0	+5LD	5	219	46.11	9	NA
Col-0	+5LD	5	220	57.3	10	NA
Col-0	+5LD	5	221	61.05	10	NA
Col-0	+5LD	5	222	48.67	11	NA
Col-0	+5LD	5	227	69.3	5	PZ
Col-0	+5LD	5	228	53.22	6	NA
Col-0	+5LD	5	229	39.01	7	NA
Col-0	+5LD	5	230	47.85	8	NA
Col-0	+5LD	5	231	43.28	9	NA
Col-0	+5LD	5	232	45.18	10	NA
Col-0	+5LD	5	233	69.11	11	NA
Col-0	+5LD	5	234	74.13	11	NA
Col-0	+5LD	5	235	34.92	5	PZ
Col-0	+5LD	5	236	55.12	6	NA
Col-0	+5LD	5	237	32.39	7	NA
Col-0	+5LD	5	238	70.67	7	NA
Col-0	+5LD	5	239	36.97	8	NA
Col-0	+5LD	5	240	42.31	8	NA
Col-0	+5LD	5	241	32.26	9	NA
Col-0	+5LD	5	242	46.72	10	NA
Col-0	+5LD	5	243	62.32	10	NA
Col-0	+5LD	5	244	49.97	11	NA
Col-0	+5LD	5	245	61.38	11	NA
Col-0	+5LD	5	246	41.19	5	PZ
Col-0	+5LD	5	247	58.46	5	PZ
Col-0	+5LD	5	248	54.92	5	PZ
Col-0	+5LD	5	249	45.88	5	PZ
Col-0	+5LD	5	250	59.42	5	PZ
Col-0	+5LD	5	251	66.96	6	NA
Col-0	+5LD	5	252	33.12	6	NA
Col-0	+5LD	5	253	67.64	7	NA
Col-0	+5LD	5	254	52.75	6	NA
Col-0	+5LD	5	255	57.61	6	NA
Col-0	+5LD	5	256	76.31	6	NA
Col-0	+5LD	5	257	38.03	7	NA
Col-0	+5LD	5	258	39.31	8	NA
Col-0	+5LD	5	259	41.95	7	NA
Col-0	+5LD	5	261	31.3	7	NA
Col-0	+5LD	5	262	57.41	7	NA
Col-0	+5LD	5	263	39.17	8	NA
Col-0	+5LD	5	264	33.32	9	NA
Col-0	+5LD	5	265	35.6	8	NA
Col-0	+5LD	5	266	38.61	9	NA
Col-0	+5LD	5	267	59.5	7	NA
Col-0	+5LD	5	268	26.8	8	NA
Col-0	+5LD	5	269	53.37	8	NA
Col-0	+5LD	5	271	68.26	9	NA
Col-0	+5LD	5	272	61.39	9	NA
Col-0	+5LD	5	273	31.67	8	NA
Col-0	+5LD	5	274	24.01	9	NA
Col-0	+5LD	5	275	49.81	9	NA
Col-0	+5LD	5	276	54.1	10	NA
Col-0	+5LD	5	277	35.09	10	NA
Col-0	+5LD	5	278	42.68	9	NA
Col-0	+5LD	5	279	50.74	10	NA
Col-0	+5LD	5	280	48.18	8	NA
Col-0	+5LD	5	281	35.41	9	NA
Col-0	+5LD	5	282	35.8	10	NA
Col-0	+5LD	5	283	30.97	10	NA
Col-0	+5LD	5	284	53.91	11	NA
Col-0	+5LD	5	285	40.78	7	NA
Col-0	+5LD	5	286	57.67	6	NA
Col-0	+5LD	5	287	54.25	7	NA
Col-0	+5LD	5	288	31.37	7	NA
Col-0	+5LD	5	289	35.79	6	NA
Col-0	+5LD	5	290	30.6	6	NA
Col-0	+5LD	5	291	28.65	7	NA
Col-0	+5LD	5	292	41.61	7	NA
Col-0	+5LD	5	293	36.89	7	NA
Col-0	+5LD	5	294	35.75	8	NA
Col-0	+5LD	5	295	40.05	8	NA
Col-0	+5LD	5	296	24.07	9	NA
Col-0	+5LD	5	297	38.11	9	NA
Col-0	+5LD	5	298	36.85	10	NA
Col-0	+5LD	5	299	53.76	10	NA
Col-0	+5LD	5	300	43.72	9	NA
Col-0	+5LD	5	301	34.25	10	NA
Col-0	+5LD	5	302	57.83	10	NA
Col-0	+5LD	5	303	43.25	8	NA
Col-0	+5LD	5	304	37.54	9	NA
Col-0	+5LD	5	305	28.06	10	NA
Col-0	+5LD	5	306	27.64	8	NA
Col-0	+5LD	5	307	37.64	8	NA
Col-0	+5LD	5	308	45.39	7	NA
Col-0	+5LD	5	309	47.6	8	NA
Col-0	+5LD	5	310	50.3	6	NA
Col-0	+5LD	5	311	49.08	7	NA
Col-0	+5LD	5	313	82.09	6	NA
Col-0	+5LD	5	317	55.01	9	NA
Col-0	+5LD	5	320	45.37	11	NA
Col-0	+5LD	5	321	44.23	11	NA
Col-0	+5LD	5	322	38.79	11	NA
Col-0	+5LD	5	323	38.13	12	NA
Col-0	+5LD	5	325	68.87	12	NA
Col-0	+5LD	5	349	65.09	8	NA
Col-0	+5LD	5	350	67.65	7	NA
Col-0	+5LD	5	351	73.38	7	NA
Col-0	+5LD	5	352	45.94	8	NA
Col-0	+5LD	5	353	50.9	9	NA
Col-0	+5LD	5	363	65.19	8	NA
Col-0	+5LD	5	364	68.39	9	NA
Col-0	+5LD	5	365	66.75	10	NA
Col-0	+5LD	5	366	37.42	11	NA
Col-0	+5LD	5	367	34.8	12	NA
Col-0	+5LD	5	370	47.72	8	NA
Col-0	+5LD	5	371	65.07	8	NA
Col-0	+5LD	5	372	48.35	9	NA
Col-0	+5LD	5	373	49.72	10	NA
Col-0	+5LD	5	374	46.39	11	NA
Col-0	+5LD	5	377	59.58	7	NA
Col-0	+5LD	5	378	56.88	8	NA
Col-0	+5LD	5	379	33.51	9	NA
Col-0	+5LD	5	380	61.84	9	NA
Col-0	+5LD	5	381	47.61	10	NA
Col-0	+5LD	5	383	71.53	7	NA
Col-0	+5LD	5	384	47.82	8	NA
Col-0	+5LD	5	417	42.27	9	NA
Col-0	+5LD	5	423	55.31	10	NA
Col-0	+5LD	5	439	44.26	11	NA
Col-0	+5LD	5	441	43.52	11	NA
Col-0	+5LD	5	442	61.04	11	NA
Col-0	+5LD	5	527	35.43	13	NA
Col-0	+5LD	5	528	27.81	11	NA
Col-0	+5LD	5	529	39.26	11	NA
Col-0	+5LD	5	530	58.07	11	NA
Col-0	+5LD	5	531	56.3	12	NA
Col-0	+5LD	5	532	60.24	11	NA
Col-0	+5LD	5	533	23.65	11	NA
Col-0	+5LD	5	534	41.46	10	NA
Col-0	+5LD	5	535	36.38	10	NA
Col-0	+5LD	5	536	55.39	11	NA
Col-0	+5LD	5	537	33.8	10	NA
Col-0	+5LD	5	538	25.14	10	NA
Col-0	+5LD	5	539	78.64	11	NA
Col-0	+5LD	5	540	64.14	11	NA
Col-0	+5LD	5	541	47.74	11	NA
Col-0	+5LD	5	542	52.75	12	NA
Col-0	+5LD	5	543	62.44	12	NA
Col-0	+5LD	5	561	35.18	13	NA
Col-0	+5LD	5	569	45.39	8	NA
Col-0	+5LD	5	570	45.4	9	NA
Col-0	+5LD	5	571	55.83	3	PZ
Col-0	+5LD	5	572	62.4	4	PZ
Col-0	+5LD	5	576	86.62	6	NA
Col-0	+5LD	5	577	64.08	5	PZ
Col-0	+5LD	5	578	77.52	7	NA
Col-0	+5LD	5	579	47.18	7	NA
Col-0	+5LD	5	3646	31.95	13	NA
Col-0	+5LD	5	3647	45.02	13	NA
Col-0	+5LD	5	3648	34.32	12	NA
Col-0	+5LD	5	3649	52.07	12	NA
Col-0	+5LD	5	3650	28.39	12	NA
Col-0	+5LD	5	3651	52.71	13	NA
Col-0	+5LD	5	3652	29.66	13	NA
Col-0	+5LD	5	3653	55.63	13	NA
Col-0	+5LD	5	3654	23.35	12	NA
Col-0	+5LD	5	3655	55.06	12	NA
Col-0	+5LD	5	3656	29.97	12	NA
Col-0	+5LD	5	3657	35.04	12	NA
Col-0	+5LD	5	3658	41.23	12	NA
Col-0	+5LD	5	3659	45.27	13	NA
Col-0	+5LD	5	3788	41.05	14	NA
Col-0	+5LD	5	3791	28.97	13	NA
Col-0	+5LD	5	3792	44.35	14	NA
Col-0	+5LD	6	357	66.47	3	PZ
Col-0	+5LD	6	358	38.77	2	CZ
Col-0	+5LD	6	359	50.7	2	CZ
Col-0	+5LD	6	360	58.07	1	CZ
Col-0	+5LD	6	361	72.02	1	CZ
Col-0	+5LD	6	362	42.83	2	CZ
Col-0	+5LD	6	363	58.94	3	PZ
Col-0	+5LD	6	364	27.07	2	CZ
Col-0	+5LD	6	365	65.55	3	PZ
Col-0	+5LD	6	366	50.15	4	PZ
Col-0	+5LD	6	367	66.59	4	PZ
Col-0	+5LD	6	368	61.35	4	PZ
Col-0	+5LD	6	369	49.49	4	PZ
Col-0	+5LD	6	370	38.77	3	PZ
Col-0	+5LD	6	371	35.32	2	CZ
Col-0	+5LD	6	372	64.27	3	PZ
Col-0	+5LD	6	373	28.06	4	PZ
Col-0	+5LD	6	374	62.79	4	PZ
Col-0	+5LD	6	375	64.26	5	PZ
Col-0	+5LD	6	376	51.64	5	PZ
Col-0	+5LD	6	377	68.03	5	PZ
Col-0	+5LD	6	378	50.71	6	NA
Col-0	+5LD	6	379	67.8	5	PZ
Col-0	+5LD	6	380	60.96	5	PZ
Col-0	+5LD	6	381	32.94	6	NA
Col-0	+5LD	6	382	66.75	6	NA
Col-0	+5LD	6	383	38.58	5	PZ
Col-0	+5LD	6	384	30.78	4	PZ
Col-0	+5LD	6	385	31.71	4	PZ
Col-0	+5LD	6	386	63.88	4	PZ
Col-0	+5LD	6	387	24.9	3	PZ
Col-0	+5LD	6	388	62.02	3	PZ
Col-0	+5LD	6	389	34.21	2	CZ
Col-0	+5LD	6	390	40.17	2	CZ
Col-0	+5LD	6	391	37.66	1	CZ
Col-0	+5LD	6	392	50.6	0	CZ
Col-0	+5LD	6	393	27.9	1	CZ
Col-0	+5LD	6	394	59.25	1	CZ
Col-0	+5LD	6	395	59.12	2	CZ
Col-0	+5LD	6	396	39.94	2	CZ
Col-0	+5LD	6	397	55.13	3	PZ
Col-0	+5LD	6	398	35.19	3	PZ
Col-0	+5LD	6	399	50.35	4	PZ
Col-0	+5LD	6	400	57.09	4	PZ
Col-0	+5LD	6	401	57.46	5	PZ
Col-0	+5LD	6	402	42.2	5	PZ
Col-0	+5LD	6	403	49.95	6	NA
Col-0	+5LD	6	404	46.66	5	PZ
Col-0	+5LD	6	405	47.38	6	NA
Col-0	+5LD	6	406	36.49	6	NA
Col-0	+5LD	6	407	72.89	7	NA
Col-0	+5LD	6	408	52.53	7	NA
Col-0	+5LD	6	409	43.47	6	NA
Col-0	+5LD	6	410	32.59	6	NA
Col-0	+5LD	6	411	70.94	5	PZ
Col-0	+5LD	6	412	52.21	5	PZ
Col-0	+5LD	6	413	51.14	6	NA
Col-0	+5LD	6	414	29.02	4	PZ
Col-0	+5LD	6	415	29.51	4	PZ
Col-0	+5LD	6	416	43.07	5	PZ
Col-0	+5LD	6	417	34.8	4	PZ
Col-0	+5LD	6	418	55.87	3	PZ
Col-0	+5LD	6	419	43.49	2	CZ
Col-0	+5LD	6	420	65.48	3	PZ
Col-0	+5LD	6	421	50.06	3	PZ
Col-0	+5LD	6	422	57.66	2	CZ
Col-0	+5LD	6	423	44.69	1	CZ
Col-0	+5LD	6	424	38.93	2	CZ
Col-0	+5LD	6	425	43.7	2	CZ
Col-0	+5LD	6	426	71.73	3	PZ
Col-0	+5LD	6	427	54.69	3	PZ
Col-0	+5LD	6	428	55.39	4	PZ
Col-0	+5LD	6	429	41.16	4	PZ
Col-0	+5LD	6	430	44.52	4	PZ
Col-0	+5LD	6	431	67.13	3	PZ
Col-0	+5LD	6	432	72.58	4	PZ
Col-0	+5LD	6	433	72.31	4	PZ
Col-0	+5LD	6	434	46.98	4	PZ
Col-0	+5LD	6	435	82.2	5	PZ
Col-0	+5LD	6	436	77.08	4	PZ
Col-0	+5LD	6	437	39.21	5	PZ
Col-0	+5LD	6	438	47.43	5	PZ
Col-0	+5LD	6	439	61.54	6	NA
Col-0	+5LD	6	440	73.7	6	NA
Col-0	+5LD	6	441	59.65	7	NA
Col-0	+5LD	6	442	48.4	6	NA
Col-0	+5LD	6	443	74.36	5	PZ
Col-0	+5LD	6	444	83.95	6	NA
Col-0	+5LD	6	445	54.22	6	NA
Col-0	+5LD	6	446	73.2	5	PZ
Col-0	+5LD	6	447	36.17	6	NA
Col-0	+5LD	6	448	66.17	6	NA
Col-0	+5LD	6	449	72.82	7	NA
Col-0	+5LD	6	450	90.33	6	NA
Col-0	+5LD	6	451	90.47	5	PZ
Col-0	+5LD	6	452	53.33	6	NA
Col-0	+5LD	6	453	80.74	7	NA
Col-0	+5LD	6	454	68.05	8	NA
Col-0	+5LD	6	455	58.45	7	NA
Col-0	+5LD	6	456	31.76	8	NA
Col-0	+5LD	6	457	63.9	8	NA
Col-0	+5LD	6	458	57.13	7	NA
Col-0	+5LD	6	459	41.65	6	NA
Col-0	+5LD	6	460	35.73	6	NA
Col-0	+5LD	6	461	71.37	5	PZ
Col-0	+5LD	6	462	57.59	5	PZ
Col-0	+5LD	6	463	62.29	5	PZ
Col-0	+5LD	6	464	33.78	6	NA
Col-0	+5LD	6	465	57.89	6	NA
Col-0	+5LD	6	466	28.07	6	NA
Col-0	+5LD	6	467	42.75	7	NA
Col-0	+5LD	6	468	53.4	7	NA
Col-0	+5LD	6	469	49.69	7	NA
Col-0	+5LD	6	470	40.98	8	NA
Col-0	+5LD	6	471	76.28	8	NA
Col-0	+5LD	6	472	40.34	5	PZ
Col-0	+5LD	6	473	67.35	6	NA
Col-0	+5LD	6	474	67.19	6	NA
Col-0	+5LD	6	475	36.98	7	NA
Col-0	+5LD	6	476	34.56	7	NA
Col-0	+5LD	6	477	74.63	5	PZ
Col-0	+5LD	6	478	49.29	6	NA
Col-0	+5LD	6	479	73.09	7	NA
Col-0	+5LD	6	480	44.06	7	NA
Col-0	+5LD	6	481	63.62	8	NA
Col-0	+5LD	6	483	47.26	5	PZ
Col-0	+5LD	6	484	50.05	5	PZ
Col-0	+5LD	6	485	37.16	6	NA
Col-0	+5LD	6	486	63.1	6	NA
Col-0	+5LD	6	487	57.51	7	NA
Col-0	+5LD	6	488	47.84	6	NA
Col-0	+5LD	6	489	47.81	7	NA
Col-0	+5LD	6	490	42.95	5	PZ
Col-0	+5LD	6	491	44.69	6	NA
Col-0	+5LD	6	493	45.57	6	NA
Col-0	+5LD	6	494	53.78	5	PZ
Col-0	+5LD	6	495	50.39	6	NA
Col-0	+5LD	6	496	50.1	7	NA
Col-0	+5LD	6	497	70.28	7	NA
Col-0	+5LD	6	498	72.13	8	NA
Col-0	+5LD	6	499	61.16	7	NA
Col-0	+5LD	6	500	67.15	8	NA
Col-0	+5LD	6	501	31.41	6	NA
Col-0	+5LD	6	502	49.2	7	NA
Col-0	+5LD	6	503	55.35	8	NA
Col-0	+5LD	6	504	63.19	9	NA
Col-0	+5LD	6	505	71.58	8	NA
Col-0	+5LD	6	506	75.13	7	NA
Col-0	+5LD	6	507	82.34	6	NA
Col-0	+5LD	6	508	62.85	6	NA
Col-0	+5LD	6	509	32.18	7	NA
Col-0	+5LD	6	510	50.9	7	NA
Col-0	+5LD	6	511	52.55	7	NA
Col-0	+5LD	6	512	61.06	8	NA
Col-0	+5LD	6	513	42.33	6	NA
Col-0	+5LD	6	514	38.07	7	NA
Col-0	+5LD	6	515	37.65	7	NA
Col-0	+5LD	6	516	33.12	8	NA
Col-0	+5LD	6	517	47.19	8	NA
Col-0	+5LD	6	518	52.68	8	NA
Col-0	+5LD	6	519	65.66	9	NA
Col-0	+5LD	6	520	48.41	9	NA
Col-0	+5LD	6	521	76.76	10	NA
Col-0	+5LD	6	522	58.27	10	NA
Col-0	+5LD	6	523	52.74	9	NA
Col-0	+5LD	6	524	45.2	9	NA
Col-0	+5LD	6	525	51.18	8	NA
Col-0	+5LD	6	526	70.05	8	NA
Col-0	+5LD	6	527	83.32	7	NA
Col-0	+5LD	6	528	48.49	8	NA
Col-0	+5LD	6	529	49.35	8	NA
Col-0	+5LD	6	530	53.81	9	NA
Col-0	+5LD	6	531	52.93	8	NA
Col-0	+5LD	6	532	46.56	9	NA
Col-0	+5LD	6	534	37.09	9	NA
Col-0	+5LD	6	535	42.39	9	NA
Col-0	+5LD	6	536	35.27	10	NA
Col-0	+5LD	6	537	57.51	10	NA
Col-0	+5LD	6	538	31.89	11	NA
Col-0	+5LD	6	539	30.79	11	NA
Col-0	+5LD	6	540	33.69	11	NA
Col-0	+5LD	6	560	66.42	9	NA
Col-0	+5LD	6	561	73.79	9	NA
Col-0	+5LD	6	562	42.03	10	NA
Col-0	+5LD	6	563	48.49	9	NA
Col-0	+5LD	6	564	60.46	9	NA
Col-0	+5LD	6	565	56.94	10	NA
Col-0	+5LD	6	566	41.72	11	NA
Col-0	+5LD	6	567	61.9	11	NA
Col-0	+5LD	6	568	39.78	10	NA
Col-0	+5LD	6	569	40.69	11	NA
Col-0	+5LD	6	570	45.15	10	NA
Col-0	+5LD	6	582	72.19	10	NA
Col-0	+5LD	6	583	52.76	10	NA
Col-0	+5LD	6	584	56.79	8	NA
Col-0	+5LD	6	585	42.61	9	NA
Col-0	+5LD	6	586	41.57	10	NA
Col-0	+5LD	6	587	34.72	10	NA
Col-0	+5LD	6	588	45.34	8	NA
Col-0	+5LD	6	589	47.68	9	NA
Col-0	+5LD	6	590	61.24	9	NA
Col-0	+5LD	6	591	34.45	8	NA
Col-0	+5LD	6	592	50.31	7	NA
Col-0	+5LD	6	593	33.6	8	NA
Col-0	+5LD	6	594	41.22	7	NA
Col-0	+5LD	6	595	51.94	8	NA
Col-0	+5LD	6	596	47.44	9	NA
Col-0	+5LD	6	597	38.48	9	NA
Col-0	+5LD	6	598	53.4	8	NA
Col-0	+5LD	6	599	73.09	8	NA
Col-0	+5LD	6	600	55.63	8	NA
Col-0	+5LD	6	601	69.31	7	NA
Col-0	+5LD	6	602	46.98	8	NA
Col-0	+5LD	6	603	36.56	8	NA
Col-0	+5LD	6	604	35.56	9	NA
Col-0	+5LD	6	605	61.68	9	NA
Col-0	+5LD	6	606	85.15	9	NA
Col-0	+5LD	6	607	59.62	10	NA
Col-0	+5LD	6	610	75.28	10	NA
Col-0	+5LD	6	612	40.28	9	NA
Col-0	+5LD	6	614	66.52	9	NA
Col-0	+5LD	6	615	39.13	9	NA
Col-0	+5LD	6	616	49.89	9	NA
Col-0	+5LD	6	617	44.8	10	NA
Col-0	+5LD	6	618	55.17	8	NA
Col-0	+5LD	6	619	63.56	9	NA
Col-0	+5LD	6	620	43.02	10	NA
Col-0	+5LD	6	621	26.85	10	NA
Col-0	+5LD	6	622	33.11	9	NA
Col-0	+5LD	6	623	52.3	9	NA
Col-0	+5LD	6	624	51.33	8	NA
Col-0	+5LD	6	625	32.46	9	NA
Col-0	+5LD	6	626	37.51	9	NA
Col-0	+5LD	6	627	40.27	10	NA
Col-0	+5LD	6	628	63.17	10	NA
Col-0	+5LD	6	629	32.88	10	NA
Col-0	+5LD	6	630	49.47	11	NA
Col-0	+5LD	6	631	41.14	10	NA
Col-0	+5LD	6	632	28.27	11	NA
Col-0	+5LD	6	633	59.32	10	NA
Col-0	+5LD	6	634	43.76	9	NA
Col-0	+5LD	6	635	56.5	8	NA
Col-0	+5LD	6	636	28.12	9	NA
Col-0	+5LD	6	637	38.7	10	NA
Col-0	+5LD	6	638	56.18	11	NA
Col-0	+5LD	6	639	63.69	11	NA
Col-0	+5LD	6	640	35.55	12	NA
Col-0	+5LD	6	641	44.81	12	NA
Col-0	+5LD	6	642	34.83	11	NA
Col-0	+5LD	6	643	40.75	11	NA
Col-0	+5LD	6	644	51.46	12	NA
Col-0	+5LD	6	645	60.47	11	NA
Col-0	+5LD	6	646	72.73	10	NA
Col-0	+5LD	6	649	53.14	9	NA
Col-0	+5LD	6	650	33.99	9	NA
Col-0	+5LD	6	652	42.11	8	NA
Col-0	+5LD	6	661	48.85	7	NA
Col-0	+5LD	6	662	65.77	8	NA
Col-0	+5LD	6	663	53.37	7	NA
Col-0	+5LD	6	665	58.63	7	NA
Col-0	+5LD	6	666	52.04	8	NA
Col-0	+5LD	6	667	45.85	7	NA
Col-0	+5LD	6	668	45.72	8	NA
Col-0	+5LD	6	669	30.56	9	NA
Col-0	+5LD	6	685	64.24	9	NA
Col-0	+5LD	6	686	38.47	7	NA
Col-0	+5LD	6	687	53.47	7	NA
Col-0	+5LD	6	688	70.87	8	NA
Col-0	+5LD	6	689	76.03	8	NA
Col-0	+5LD	6	690	63.01	8	NA
Col-0	+5LD	6	691	69.46	7	NA
Col-0	+5LD	6	692	59.22	7	NA
Col-0	+5LD	6	693	28.2	6	NA
Col-0	+5LD	6	694	43.4	7	NA
Col-0	+5LD	6	695	35.76	6	NA
Col-0	+5LD	6	696	34.86	7	NA
Col-0	+5LD	6	697	42.81	8	NA
Col-0	+5LD	6	698	47.82	9	NA
Col-0	+5LD	6	699	55.19	8	NA
Col-0	+5LD	6	700	31.75	8	NA
Col-0	+5LD	6	701	40.62	8	NA
Col-0	+5LD	6	702	33.23	9	NA
Col-0	+5LD	6	703	31.43	9	NA
Col-0	+5LD	6	704	50.38	9	NA
Col-0	+5LD	6	705	62.79	9	NA
Col-0	+5LD	6	706	34.71	9	NA
Col-0	+5LD	6	714	59.7	10	NA
Col-0	+5LD	6	715	42.71	9	NA
Col-0	+5LD	6	716	37.16	10	NA
Col-0	+5LD	6	717	40.73	9	NA
Col-0	+5LD	6	718	38.89	10	NA
Col-0	+5LD	6	719	43.31	9	NA
Col-0	+5LD	6	720	33.7	10	NA
Col-0	+5LD	6	721	45.58	11	NA
Col-0	+5LD	6	722	50.12	11	NA
Col-0	+5LD	6	723	41.24	11	NA
Col-0	+5LD	6	724	57.72	11	NA
Col-0	+5LD	6	725	65.56	11	NA
Col-0	+5LD	6	726	32.24	12	NA
Col-0	+5LD	6	727	40.42	12	NA
Col-0	+5LD	6	728	44.17	12	NA
Col-0	+5LD	6	731	76.88	7	NA
Col-0	+5LD	6	732	77.69	8	NA
Col-0	+5LD	6	733	70.13	8	NA
Col-0	+5LD	6	734	35.21	7	NA
Col-0	+5LD	6	735	40.7	8	NA
Col-0	+5LD	6	736	35.76	9	NA
Col-0	+5LD	6	737	36.4	10	NA
Col-0	+5LD	6	738	47.82	10	NA
Col-0	+5LD	6	739	54.08	10	NA
Col-0	+5LD	6	740	46.68	11	NA
Col-0	+5LD	6	741	48.33	12	NA
Col-0	+5LD	6	742	48.09	12	NA
Col-0	+5LD	6	743	42.12	12	NA
Col-0	+5LD	6	745	62.44	11	NA
Col-0	+5LD	6	746	36.12	11	NA
Col-0	+5LD	6	747	36.03	10	NA
Col-0	+5LD	6	748	29.45	9	NA
Col-0	+5LD	6	749	42.32	9	NA
Col-0	+5LD	6	750	64.65	8	NA
Col-0	+5LD	6	751	44.05	9	NA
Col-0	+5LD	6	752	55.24	10	NA
Col-0	+5LD	6	753	61.63	10	NA
Col-0	+5LD	6	754	38.89	11	NA
Col-0	+5LD	6	755	61.4	11	NA
Col-0	+5LD	6	756	32.4	10	NA
Col-0	+5LD	6	757	53.78	10	NA
Col-0	+5LD	6	758	38.69	11	NA
Col-0	+5LD	6	759	52.5	11	NA
Col-0	+5LD	6	760	64.2	12	NA
Col-0	+5LD	6	761	67.07	12	NA
Col-0	+5LD	6	762	66.99	11	NA
Col-0	+5LD	6	763	30.75	12	NA
Col-0	+5LD	6	764	56.6	11	NA
Col-0	+5LD	6	765	64.9	12	NA
Col-0	+5LD	6	768	41.86	13	NA
Col-0	+5LD	6	769	52.45	12	NA
Col-0	+5LD	6	770	38.51	13	NA
Col-0	+5LD	6	797	53.43	12	NA
Col-0	+5LD	6	798	56.22	12	NA
Col-0	+5LD	6	799	61.11	13	NA
Col-0	+5LD	6	802	48.44	13	NA
Col-0	+5LD	6	803	46.29	12	NA
Col-0	+5LD	6	804	37.71	13	NA
Col-0	+5LD	6	805	48.78	13	NA
Col-0	+5LD	6	810	62.83	13	NA
Col-0	+5LD	6	912	59.02	11	NA
Col-0	+5LD	6	913	64.17	11	NA
Col-0	+5LD	6	914	49.6	12	NA
Col-0	+5LD	6	915	83.95	11	NA
Col-0	+5LD	6	916	41.21	10	NA
Col-0	+5LD	6	917	49.73	10	NA
Col-0	+5LD	6	918	38.83	10	NA
Col-0	+5LD	6	919	42.66	9	NA
Col-0	+5LD	6	920	40.89	10	NA
Col-0	+5LD	6	921	64.91	11	NA
Col-0	+5LD	6	941	45.29	12	NA
Col-0	+5LD	6	942	53.04	13	NA
Col-0	+5LD	6	1089	44.49	11	NA
Col-0	+5LD	6	1090	59.43	11	NA
Col-0	+5LD	6	1092	58.9	12	NA
Col-0	+5LD	6	1125	43.45	4	PZ
Col-0	+5LD	6	1126	41.05	4	PZ
Col-0	+5SD	2	1	39.85	1	CZ
Col-0	+5SD	2	2	38.63	2	CZ
Col-0	+5SD	2	3	36.83	1	CZ
Col-0	+5SD	2	4	15.37	2	CZ
Col-0	+5SD	2	5	44.22	3	PZ
Col-0	+5SD	2	6	35.37	3	PZ
Col-0	+5SD	2	7	47.06	3	PZ
Col-0	+5SD	2	8	42.63	2	CZ
Col-0	+5SD	2	9	27.18	3	PZ
Col-0	+5SD	2	10	33.9	4	PZ
Col-0	+5SD	2	11	31.95	4	PZ
Col-0	+5SD	2	13	33.1	3	PZ
Col-0	+5SD	2	14	33.24	2	CZ
Col-0	+5SD	2	15	37.54	3	PZ
Col-0	+5SD	2	16	18.6	4	PZ
Col-0	+5SD	2	17	34.9	4	PZ
Col-0	+5SD	2	22	32.54	4	PZ
Col-0	+5SD	2	23	43.05	4	PZ
Col-0	+5SD	2	25	18.51	4	PZ
Col-0	+5SD	2	26	40.21	4	PZ
Col-0	+5SD	2	27	15.52	4	PZ
Col-0	+5SD	2	28	31.43	5	PZ
Col-0	+5SD	2	29	25.07	3	PZ
Col-0	+5SD	2	30	41.66	2	CZ
Col-0	+5SD	2	31	31.73	2	CZ
Col-0	+5SD	2	32	48.3	1	CZ
Col-0	+5SD	2	33	19.87	2	CZ
Col-0	+5SD	2	34	37.57	2	CZ
Col-0	+5SD	2	35	32.16	3	PZ
Col-0	+5SD	2	36	47.82	3	PZ
Col-0	+5SD	2	37	31.62	3	PZ
Col-0	+5SD	2	38	30.34	4	PZ
Col-0	+5SD	2	39	26.18	5	PZ
Col-0	+5SD	2	41	37.57	5	PZ
Col-0	+5SD	2	42	42.32	5	PZ
Col-0	+5SD	2	44	42.82	5	PZ
Col-0	+5SD	2	45	47.32	5	PZ
Col-0	+5SD	2	48	28.73	6	NA
Col-0	+5SD	2	49	22.72	6	NA
Col-0	+5SD	2	51	38.83	7	NA
Col-0	+5SD	2	53	36.87	7	NA
Col-0	+5SD	2	54	48.79	7	NA
Col-0	+5SD	2	55	39.11	5	PZ
Col-0	+5SD	2	56	29.13	6	NA
Col-0	+5SD	2	60	49.19	6	NA
Col-0	+5SD	2	61	58.66	7	NA
Col-0	+5SD	2	62	47.43	7	NA
Col-0	+5SD	2	69	23.49	0	CZ
Col-0	+5SD	2	70	26.6	1	CZ
Col-0	+5SD	2	71	29.69	2	CZ
Col-0	+5SD	2	72	29.94	3	PZ
Col-0	+5SD	2	73	41.24	2	CZ
Col-0	+5SD	2	74	25.38	2	CZ
Col-0	+5SD	2	75	23.55	3	PZ
Col-0	+5SD	2	76	27.4	3	PZ
Col-0	+5SD	2	77	42.76	3	PZ
Col-0	+5SD	2	78	27.27	4	PZ
Col-0	+5SD	2	80	17.9	5	PZ
Col-0	+5SD	2	82	31.89	4	PZ
Col-0	+5SD	2	83	23.21	5	PZ
Col-0	+5SD	2	84	26.85	3	PZ
Col-0	+5SD	2	85	31.41	4	PZ
Col-0	+5SD	2	86	51.71	3	PZ
Col-0	+5SD	2	87	36.31	3	PZ
Col-0	+5SD	2	88	34.28	4	PZ
Col-0	+5SD	2	89	43.73	4	PZ
Col-0	+5SD	2	90	39.79	4	PZ
Col-0	+5SD	2	91	39.59	4	PZ
Col-0	+5SD	2	92	44.26	5	PZ
Col-0	+5SD	2	93	31.92	5	PZ
Col-0	+5SD	2	94	26.31	5	PZ
Col-0	+5SD	2	95	26.13	5	PZ
Col-0	+5SD	2	96	36.72	5	PZ
Col-0	+5SD	2	122	37.15	6	NA
Col-0	+5SD	2	125	41.46	6	NA
Col-0	+5SD	2	201	62.12	8	NA
Col-0	+5SD	2	210	47.84	6	NA
Col-0	+5SD	2	216	20.55	4	PZ
Col-0	+5SD	2	219	21.15	4	PZ
Col-0	+5SD	2	257	48.12	6	NA
Col-0	+5SD	2	258	45.48	6	NA
Col-0	+5SD	2	259	35.21	6	NA
Col-0	+5SD	2	260	41.21	4	PZ
Col-0	+5SD	2	261	23.71	4	PZ
Col-0	+5SD	3	1	38.38	1	CZ
Col-0	+5SD	3	2	25.91	0	CZ
Col-0	+5SD	3	3	49.98	1	CZ
Col-0	+5SD	3	4	23.8	1	CZ
Col-0	+5SD	3	5	48.54	2	CZ
Col-0	+5SD	3	6	40.21	2	CZ
Col-0	+5SD	3	7	28.61	1	CZ
Col-0	+5SD	3	8	22.58	1	CZ
Col-0	+5SD	3	9	37.62	2	CZ
Col-0	+5SD	3	10	30.49	2	CZ
Col-0	+5SD	3	11	25.02	3	PZ
Col-0	+5SD	3	12	20.59	3	PZ
Col-0	+5SD	3	13	32.33	4	PZ
Col-0	+5SD	3	14	46.65	3	PZ
Col-0	+5SD	3	15	25.37	2	CZ
Col-0	+5SD	3	16	48.5	3	PZ
Col-0	+5SD	3	17	21.18	2	CZ
Col-0	+5SD	3	18	25.99	3	PZ
Col-0	+5SD	3	19	34.75	2	CZ
Col-0	+5SD	3	20	35.49	3	PZ
Col-0	+5SD	3	21	34.52	2	CZ
Col-0	+5SD	3	22	39.07	2	CZ
Col-0	+5SD	3	23	30.05	3	PZ
Col-0	+5SD	3	24	41.16	3	PZ
Col-0	+5SD	3	25	56.62	3	PZ
Col-0	+5SD	3	26	38.96	3	PZ
Col-0	+5SD	3	27	39.23	3	PZ
Col-0	+5SD	3	28	32.14	3	PZ
Col-0	+5SD	3	29	31.61	3	PZ
Col-0	+5SD	3	30	34.39	4	PZ
Col-0	+5SD	3	31	54.43	4	PZ
Col-0	+5SD	3	32	36.45	4	PZ
Col-0	+5SD	3	33	24.06	5	PZ
Col-0	+5SD	3	35	43.54	5	PZ
Col-0	+5SD	3	36	25.74	4	PZ
Col-0	+5SD	3	37	33.9	4	PZ
Col-0	+5SD	3	39	41.75	4	PZ
Col-0	+5SD	3	40	36.81	4	PZ
Col-0	+5SD	3	41	16.32	5	PZ
Col-0	+5SD	3	42	27.26	5	PZ
Col-0	+5SD	3	43	38.91	5	PZ
Col-0	+5SD	3	44	20.22	4	PZ
Col-0	+5SD	3	45	24.52	4	PZ
Col-0	+5SD	3	46	18.43	3	PZ
Col-0	+5SD	3	47	41.16	3	PZ
Col-0	+5SD	3	48	29.55	3	PZ
Col-0	+5SD	3	49	30.07	4	PZ
Col-0	+5SD	3	51	37.83	4	PZ
Col-0	+5SD	3	53	50.49	4	PZ
Col-0	+5SD	3	54	35.52	4	PZ
Col-0	+5SD	3	55	41.27	5	PZ
Col-0	+5SD	3	56	32.77	4	PZ
Col-0	+5SD	3	57	38.46	5	PZ
Col-0	+5SD	3	58	58.81	4	PZ
Col-0	+5SD	3	59	29.38	5	PZ
Col-0	+5SD	3	60	20.72	5	PZ
Col-0	+5SD	3	61	43.34	5	PZ
Col-0	+5SD	3	62	40.35	4	PZ
Col-0	+5SD	3	63	52.39	5	PZ
Col-0	+5SD	3	64	45.42	5	PZ
Col-0	+5SD	3	65	28.59	6	NA
Col-0	+5SD	3	66	43.43	6	NA
Col-0	+5SD	3	67	51.18	5	PZ
Col-0	+5SD	3	69	51.81	6	NA
Col-0	+5SD	3	70	48.33	6	NA
Col-0	+5SD	3	71	39.45	6	NA
Col-0	+5SD	3	72	47.12	6	NA
Col-0	+5SD	3	74	28.61	6	NA
Col-0	+5SD	3	75	36.27	5	PZ
Col-0	+5SD	3	76	36.29	5	PZ
Col-0	+5SD	3	78	13.6	6	NA
Col-0	+5SD	3	79	38.61	6	NA
Col-0	+5SD	3	86	37.93	6	NA
Col-0	+5SD	3	87	41.69	7	NA
Col-0	+5SD	3	88	41.62	8	NA
Col-0	+5SD	3	111	24.17	7	NA
Col-0	+5SD	3	124	34.86	6	NA
Col-0	+5SD	3	125	43.1	6	NA
Col-0	+5SD	3	126	24.25	5	PZ
Col-0	+5SD	3	127	30.86	5	PZ
Col-0	+5SD	3	128	42.12	4	PZ
Col-0	+5SD	3	129	33.98	5	PZ
Col-0	+5SD	3	130	42.17	5	PZ
Col-0	+5SD	3	131	55.25	4	PZ
Col-0	+5SD	3	132	36.65	4	PZ
Col-0	+5SD	3	133	26.38	5	PZ
Col-0	+5SD	3	152	42.77	5	PZ
Col-0	+5SD	3	155	35.41	6	NA
Col-0	+5SD	3	158	29.36	4	PZ
Col-0	+5SD	3	159	38.33	5	PZ
Col-0	+5SD	3	160	26.8	6	NA
Col-0	+5SD	3	161	42.35	6	NA
Col-0	+5SD	3	163	37.58	6	NA
Col-0	+5SD	3	164	30.43	5	PZ
Col-0	+5SD	3	165	42.86	5	PZ
Col-0	+5SD	3	166	15.01	6	NA
Col-0	+5SD	3	167	29.24	6	NA
[truncated: 7,366 more rows]
