# Supplementary material for: Regulation of shoot meristem shape by photoperiodic signaling and phytohormones during floral induction of Arabidopsis
Source: eLife journal article supplement (doi:10.7554/elife.60661), 2020-12-14
Supplement: supp [file elife-60661-supp-v1.zip › elife_poa_e60661_Figure_1_source_data_1.xlsx]

## Sheet: Sheet1
Figure 1-source data 1. Original data of meristem area and cell number of each genotype for Figure 1A-C, E-F and Figure 1- figure supplement 1
Genotype	Time point	Plant number	Meristem area (µm^2)	Cell number in the meristem area	Distance between primordia (µm)	Meristem width (µm)
Col-0	2wSD	3	1662.63	52	63.8166	60.9394
Col-0	+3LD	3	3613.3	96	95.7845	76.4478
Col-0	+3LD	4	3617.3	98	114.77	90.612
Col-0	+3LD	5	4862.75	123	104.809	89.473
Col-0	+3SD	4	2222.63	64	88.0002	79.2071
Col-0	+3SD	5	2299.11	64	72.2144	62.2753
Col-0	+3SD	6	3170.17	89	93.4523	82.5358
Col-0	+5LD	4	20023.5	391	243.128	155.506
Col-0	+5LD	5	18106.4	362	226.524	149.579
Col-0	+5LD	6	18562.6	363	220.162	142.738
Col-0	+5SD	2	2936.77	84	95.9658	88.4993
Col-0	+5SD	3	4555.98	126	125.048	108.048
Col-0	+5SD	4	3415.05	100	117.834	105.811
Col-0	2wSD	6	1656.78	53	74.9375	71.9119
Col-0	+7LD	2	15437.2	407	175.318	137.504
Col-0	+7LD	3	14904.6	423	172.846	141.197
Col-0	+7LD	4	16411	422	216.483	155.914
Col-0	+7SD	1	4439.46	119	126.631	111.391
Col-0	+7SD	2	6742.01	182	132.048	114.986
Col-0	+7SD	3	3722.12	99	141.821	122.871
Col-0	2wSD	9	1917.89	62	71.3038	65.8593
ft-10 tsf-1	2wSD	1	2703.83	69	90.902	82.6407
ft-10 tsf-1	+3LD	3	4502.54	127	100.817	89.9879
ft-10 tsf-1	+3LD	4	3637.39	93	86.145	76.669
ft-10 tsf-1	+3LD	5	2371.33	68	86.8845	76.2401
ft-10 tsf-1	+3SD	4	3203.36	90	80.6475	71.3965
ft-10 tsf-1	+3SD	5	3331.04	87	104.261	91.5051
ft-10 tsf-1	+3SD	6	3249.57	89	105.54	91.8727
ft-10 tsf-1	2wSD	4	2338.16	57	105.614	94.0614
ft-10 tsf-1	+5LD	5	10204.8	247	168.524	151.263
ft-10 tsf-1	+5LD	7	5311.07	141	142.738	119.589
ft-10 tsf-1	+5LD	8	6868.75	180	146.068	122.802
ft-10 tsf-1	+5SD	1	4008.03	120	124.308	110.792
ft-10 tsf-1	+5SD	3	5006.59	138	103.821	93.3916
ft-10 tsf-1	+5SD	2	4813.96	127	115.973	102.34
ft-10 tsf-1	2wSD	6	2187.18	72	89.5557	84.0484
ft-10 tsf-1	+7LD	1	13220.4	302	202.664	170.668
ft-10 tsf-1	+7LD	3	12169.1	305	193.104	168.979
ft-10 tsf-1	+7LD	4	11873.6	272	172.502	147.135
ft-10 tsf-1	+7SD	1	4969.17	131	114.202	102.195
ft-10 tsf-1	+7SD	3	3556.86	97	119.017	106.37
ft-10 tsf-1	+7SD	4	4187.1	109	122.251	107.512
KNAT1::GA2ox7	2wSD	1	2315.93	70	67.2935	63.808
KNAT1::GA2ox7	+3LD	1	3505.09	90	111.936	95.0178
KNAT1::GA2ox7	+3LD	2	3571.43	97	110.558	96.9108
KNAT1::GA2ox7	+3LD	3	3695.43	90	113.273	91.9442
KNAT1::GA2ox7	+3SD	1	1611.52	46	90.4165	77.7777
KNAT1::GA2ox7	+3SD	2	2741.17	73	95.9804	83.3201
KNAT1::GA2ox7	+3SD	4	3863.96	113	113.796	101.79
KNAT1::GA2ox7	2wSD	5	1288.88	37	82.2473	75.8515
KNAT1::GA2ox7	+5LD	1	9112.99	215	179.972	129.978
KNAT1::GA2ox7	+5LD	2	8631.17	200	158.02	115.27
KNAT1::GA2ox7	+5LD	3	7965.16	175	170.443	109.837
KNAT1::GA2ox7	+5SD	1	3610.83	100	123.33	114.812
KNAT1::GA2ox7	+5SD	2	2860.67	79	96.2603	88.7964
KNAT1::GA2ox7	+5SD	3	3694.37	98	113.356	100.417
KNAT1::GA2ox7	2wSD	6	2911.05	80	104.044	93.481
KNAT1::GA2ox7	+7LD	5	11165.6	271	155.761	111.53
KNAT1::GA2ox7	+7LD	6	11052.2	264	172.164	117.23
KNAT1::GA2ox7	+7LD	7	10605.1	206	164.044	116.808
KNAT1::GA2ox7	+7SD	1	3610.59	103	97.7118	89.0571
KNAT1::GA2ox7	+7SD	2	5845.4	159	123.411	112.859
KNAT1::GA2ox7	+7SD	3	3503.07	98	101.175	97.1317
