# Supplementary material for: Regulation of shoot meristem shape by photoperiodic signaling and phytohormones during floral induction of Arabidopsis
Source: eLife journal article supplement (doi:10.7554/elife.60661), 2020-12-14
Supplement: supp [file elife-60661-supp-v1.zip › elife_poa_e60661_Figure_3_source_data_1.xlsx]

## Sheet: Dataset3
Figure 3-source data 1: Original data of meristem area and cell number of each genotype for Figure 3 A-C and Figure 4-figure supplement 6B-C
Genotype	Time point	Plant number	Meristem area (µm^2)	Cell number in the meristem area
Col-0	2wSD	3	1915.22	59
Col-0	2wSD	4	1472.43	46
Col-0	2wSD	5	1954.51	62
Col-0	+3LD	1	10701.7	221
Col-0	+3LD	2	9196.72	183
Col-0	+3LD	3	8229.7	165
Col-0	+5LD	2	13230.5	288
Col-0	+5LD	3	18718.8	366
Col-0	+5LD	5	15542.1	316
Col-0	+7LD	2	14208.7	364
Col-0	+7LD	4	14543	379
Col-0	+7LD	6	14170.4	357
Col-0	+9LD	1	11573.1	380
Col-0	+9LD	3	10887.2	330
Col-0	+9LD	2	9952.1	318
ga20ox2-1	2wSD	2	2027.32	64
ga20ox2-1	2wSD	4	1741.53	54
ga20ox2-1	2wSD	8	2051.51	66
ga20ox2-1	+3LD	3	8566.49	187
ga20ox2-1	+3LD	4	6199.93	143
ga20ox2-1	+3LD	1	6184.84	140
ga20ox2-1	+5LD	2	11431.4	241
ga20ox2-1	+5LD	3	14037.4	288
ga20ox2-1	+5LD	5	13518.3	291
ga20ox2-1	+7LD	2	11672.1	311
ga20ox2-1	+7LD	3	13920.4	337
ga20ox2-1	+7LD	4	13357.7	296
ga20ox2-1	+9LD	1	9600.22	286
ga20ox2-1	+9LD	2	10919.1	304
ga2ox4-3	2wSD	1	3404.05	92
ga2ox4-3	2wSD	3	2699.09	84
ga2ox4-3	2wSD	4	2445.36	75
ga2ox4-3	+3LD	1	9860.33	199
ga2ox4-3	+3LD	3	13380.5	249
ga2ox4-3	+3LD	4	8465.1	175
ga2ox4-3	+5LD	1	12060.9	256
ga2ox4-3	+5LD	4	17491.5	322
ga2ox4-3	+5LD	3	16652.9	320
ga2ox4-3	+7LD	1	12720.2	317
ga2ox4-3	+7LD	2	12431.8	308
ga2ox4-3	+7LD	4	13705.5	334
ga2ox4-3	+9LD	2	10572.3	322
ga2ox4-3	+9LD	5	10451	318
ga2ox4-3	+9LD	1	10526.8	319
Col-0	+5LD	4	18494.2	370
ga20ox2-1	+5LD	4	10512.5	236
Col-0	+7LD	1	13812.3	365
ga20ox2-1	+7LD	5	14215	350
Col-0	2wSD	7	2244.22	70
Col-0	+3LD	6	8535.78	165
ga20ox2-1	2wSD	3	1765.21	58
ga20ox2-1	+9LD	3	11793.3	315
Col-0	+9LD	6	8785.15	293
ga2ox4-3	+3LD	2	6161.97	133
ga2ox4-3	+7LD	3	15942.7	412
ga2ox4-3	+9LD	4	12797.8	381
