# Supplementary material for: Regulation of shoot meristem shape by photoperiodic signaling and phytohormones during floral induction of Arabidopsis
Source: eLife journal article supplement (doi:10.7554/elife.60661), 2020-12-14
Supplement: supp [file elife-60661-supp-v1.zip › elife_poa_e60661_Figure_3_source_data_2.xlsx]

## Sheet: Dataset4
Figure 3-source data 2: Original data of meristem area and cell number of each genotype for Figure 3D-F and Figure 4-figure supplement 6D-F
Genotype	Time point	Plant Number	Cell label	Cell area (µm^2)	Distance from the central cell	Zone
Col-0	2wSD	3	1651	22.1873	0	CZ
Col-0	2wSD	3	1766	15.7596	1	CZ
Col-0	2wSD	3	1693	16.5199	1	CZ
Col-0	2wSD	3	1702	19.1455	1	CZ
Col-0	2wSD	3	1694	27.8467	1	CZ
Col-0	2wSD	3	1663	28.1443	1	CZ
Col-0	2wSD	3	1653	30.9379	1	CZ
Col-0	2wSD	3	1725	33.1729	1	CZ
Col-0	2wSD	3	1754	15.2816	2	CZ
Col-0	2wSD	3	1891	15.6769	2	CZ
Col-0	2wSD	3	1885	21.5264	2	CZ
Col-0	2wSD	3	1867	21.7251	2	CZ
Col-0	2wSD	3	1781	25.3888	2	CZ
Col-0	2wSD	3	1849	30.1002	2	CZ
Col-0	2wSD	3	1730	30.7799	2	CZ
Col-0	2wSD	3	1748	33.4952	2	CZ
Col-0	2wSD	3	1711	39.6054	2	CZ
Col-0	2wSD	3	1768	41.0039	2	CZ
Col-0	2wSD	3	1866	41.7644	2	CZ
Col-0	2wSD	3	1659	42.1631	2	CZ
Col-0	2wSD	3	1842	21.4652	3	PZ
Col-0	2wSD	3	1878	24.4848	3	PZ
Col-0	2wSD	3	1650	24.762	3	PZ
Col-0	2wSD	3	1688	25.6737	3	PZ
Col-0	2wSD	3	1775	26.8474	3	PZ
Col-0	2wSD	3	1751	27.8925	3	PZ
Col-0	2wSD	3	1892	29.3225	3	PZ
Col-0	2wSD	3	1877	30.6105	3	PZ
Col-0	2wSD	3	1697	30.669	3	PZ
Col-0	2wSD	3	1923	32.0724	3	PZ
Col-0	2wSD	3	1926	40.8083	3	PZ
Col-0	2wSD	3	1758	43.3508	3	PZ
Col-0	2wSD	3	1776	44.8698	3	PZ
Col-0	2wSD	3	1638	46.197	3	PZ
Col-0	2wSD	3	1883	46.2123	3	PZ
Col-0	2wSD	3	1732	60.5406	3	PZ
Col-0	2wSD	3	1856	16.2352	4	PZ
Col-0	2wSD	3	1925	18.3698	4	PZ
Col-0	2wSD	3	1712	20.7388	4	PZ
Col-0	2wSD	3	1710	25.909	4	PZ
Col-0	2wSD	3	1929	29.8592	4	PZ
Col-0	2wSD	3	1924	30.8749	4	PZ
Col-0	2wSD	3	1646	31.9328	4	PZ
Col-0	2wSD	3	1718	32.7082	4	PZ
Col-0	2wSD	3	1863	33.5222	4	PZ
Col-0	2wSD	3	1826	38.672	4	PZ
Col-0	2wSD	3	1752	47.4837	4	PZ
Col-0	2wSD	3	1691	30.5008	5	PZ
Col-0	2wSD	3	1764	31.8105	5	PZ
Col-0	2wSD	3	1692	35.7799	5	PZ
Col-0	2wSD	3	1669	39.6312	5	PZ
Col-0	2wSD	3	1647	51.1574	5	PZ
Col-0	2wSD	3	1749	53.302	5	PZ
Col-0	2wSD	3	1872	31.1458	6	NA
Col-0	2wSD	3	1915	35.5351	6	NA
Col-0	2wSD	3	1714	43.4753	6	NA
Col-0	2wSD	3	1920	50.1969	6	NA
Col-0	2wSD	3	1859	23.2626	7	NA
Col-0	2wSD	3	1919	55.108	7	NA
Col-0	+3LD	1	2266	46.1923	0	CZ
Col-0	+3LD	1	1966	54.627	1	CZ
Col-0	+3LD	1	2262	30.1109	1	CZ
Col-0	+3LD	1	2265	61.917	1	CZ
Col-0	+3LD	1	2267	39.2341	1	CZ
Col-0	+3LD	1	2268	51.3642	1	CZ
Col-0	+3LD	1	2270	40.8353	1	CZ
Col-0	+3LD	1	2277	63.4372	1	CZ
Col-0	+3LD	1	1666	40.6752	2	CZ
Col-0	+3LD	1	1727	65.4839	2	CZ
Col-0	+3LD	1	1817	43.8315	2	CZ
Col-0	+3LD	1	1930	38.0628	2	CZ
Col-0	+3LD	1	1950	64.3238	2	CZ
Col-0	+3LD	1	2023	38.1855	2	CZ
Col-0	+3LD	1	2261	40.171	2	CZ
Col-0	+3LD	1	2264	60.397	2	CZ
Col-0	+3LD	1	2269	29.7199	2	CZ
Col-0	+3LD	1	2273	39.6628	2	CZ
Col-0	+3LD	1	2276	52.1648	2	CZ
Col-0	+3LD	1	2278	41.1232	2	CZ
Col-0	+3LD	1	2281	54.9812	2	CZ
Col-0	+3LD	1	2303	30.8434	2	CZ
Col-0	+3LD	1	1673	40.0055	3	PZ
Col-0	+3LD	1	1903	51.7031	3	PZ
Col-0	+3LD	1	1916	43.5898	3	PZ
Col-0	+3LD	1	1951	73.222	3	PZ
Col-0	+3LD	1	1967	29.8549	3	PZ
Col-0	+3LD	1	2029	38.7528	3	PZ
Col-0	+3LD	1	2103	58.7682	3	PZ
Col-0	+3LD	1	2134	72.6517	3	PZ
Col-0	+3LD	1	2176	55.8787	3	PZ
Col-0	+3LD	1	2204	56.8016	3	PZ
Col-0	+3LD	1	2210	46.7962	3	PZ
Col-0	+3LD	1	2263	36.1442	3	PZ
Col-0	+3LD	1	2272	37.282	3	PZ
Col-0	+3LD	1	2275	40.5174	3	PZ
Col-0	+3LD	1	2279	36.689	3	PZ
Col-0	+3LD	1	2286	67.2406	3	PZ
Col-0	+3LD	1	2287	48.404	3	PZ
Col-0	+3LD	1	2293	64.2935	3	PZ
Col-0	+3LD	1	2302	23.9048	3	PZ
Col-0	+3LD	1	1645	45.6898	4	PZ
Col-0	+3LD	1	1714	21.5049	4	PZ
Col-0	+3LD	1	1811	36.1189	4	PZ
Col-0	+3LD	1	1827	43.1931	4	PZ
Col-0	+3LD	1	1839	75.6574	4	PZ
Col-0	+3LD	1	1855	43.2162	4	PZ
Col-0	+3LD	1	1879	64.0592	4	PZ
Col-0	+3LD	1	1880	62.3901	4	PZ
Col-0	+3LD	1	1913	37.8435	4	PZ
Col-0	+3LD	1	1919	55.6075	4	PZ
Col-0	+3LD	1	1937	30.807	4	PZ
Col-0	+3LD	1	1975	64.0034	4	PZ
Col-0	+3LD	1	2199	43.6008	4	PZ
Col-0	+3LD	1	2202	26.6187	4	PZ
Col-0	+3LD	1	2211	58.3248	4	PZ
Col-0	+3LD	1	2224	37.3584	4	PZ
Col-0	+3LD	1	2241	60.1448	4	PZ
Col-0	+3LD	1	2242	52.0303	4	PZ
Col-0	+3LD	1	2244	52.6845	4	PZ
Col-0	+3LD	1	2259	44.101	4	PZ
Col-0	+3LD	1	2271	53.8566	4	PZ
Col-0	+3LD	1	2274	28.7168	4	PZ
Col-0	+3LD	1	2280	40.1914	4	PZ
Col-0	+3LD	1	2284	60.4708	4	PZ
Col-0	+3LD	1	2288	51.6258	4	PZ
Col-0	+3LD	1	2289	36.8012	4	PZ
Col-0	+3LD	1	1655	54.8183	5	PZ
Col-0	+3LD	1	1671	35.74	5	PZ
Col-0	+3LD	1	1708	44.7379	5	PZ
Col-0	+3LD	1	1788	66.1931	5	PZ
Col-0	+3LD	1	1790	46.8445	5	PZ
Col-0	+3LD	1	1798	58.9148	5	PZ
Col-0	+3LD	1	1841	29.8196	5	PZ
Col-0	+3LD	1	1860	40.7753	5	PZ
Col-0	+3LD	1	1873	52.1315	5	PZ
Col-0	+3LD	1	1888	36.055	5	PZ
Col-0	+3LD	1	1892	44.6724	5	PZ
Col-0	+3LD	1	1893	62.9744	5	PZ
Col-0	+3LD	1	1958	46.5461	5	PZ
Col-0	+3LD	1	1976	41.0849	5	PZ
Col-0	+3LD	1	2043	60.7496	5	PZ
Col-0	+3LD	1	2121	57.2648	5	PZ
Col-0	+3LD	1	2174	34.78	5	PZ
Col-0	+3LD	1	2179	57.5905	5	PZ
Col-0	+3LD	1	2185	62.0583	5	PZ
Col-0	+3LD	1	2215	52.1381	5	PZ
Col-0	+3LD	1	2240	40.4819	5	PZ
Col-0	+3LD	1	2243	44.0875	5	PZ
Col-0	+3LD	1	2245	37.9176	5	PZ
Col-0	+3LD	1	2246	33.344	5	PZ
Col-0	+3LD	1	2248	33.8183	5	PZ
Col-0	+3LD	1	2260	65.8335	5	PZ
Col-0	+3LD	1	2283	32.718	5	PZ
Col-0	+3LD	1	2290	50.8789	5	PZ
Col-0	+3LD	1	2291	49.1948	5	PZ
Col-0	+3LD	1	2299	42.8189	5	PZ
Col-0	+3LD	1	1634	48.1447	6	NA
Col-0	+3LD	1	1694	36.4864	6	NA
Col-0	+3LD	1	1705	40.6056	6	NA
Col-0	+3LD	1	1726	61.4383	6	NA
Col-0	+3LD	1	1735	47.0063	6	NA
Col-0	+3LD	1	1768	73.7252	6	NA
Col-0	+3LD	1	1791	47.2736	6	NA
Col-0	+3LD	1	1843	49.4292	6	NA
Col-0	+3LD	1	1845	50.1734	6	NA
Col-0	+3LD	1	1846	38.7038	6	NA
Col-0	+3LD	1	1853	48.2286	6	NA
Col-0	+3LD	1	1858	53.1183	6	NA
Col-0	+3LD	1	1863	39.7623	6	NA
Col-0	+3LD	1	1869	43.4554	6	NA
Col-0	+3LD	1	1870	32.9407	6	NA
Col-0	+3LD	1	1911	73.6686	6	NA
Col-0	+3LD	1	1917	61.2509	6	NA
Col-0	+3LD	1	1932	49.0373	6	NA
Col-0	+3LD	1	1935	68.9916	6	NA
Col-0	+3LD	1	1940	48.5104	6	NA
Col-0	+3LD	1	1981	47.9071	6	NA
Col-0	+3LD	1	1989	27.0577	6	NA
Col-0	+3LD	1	2052	32.3034	6	NA
Col-0	+3LD	1	2066	31.199	6	NA
Col-0	+3LD	1	2088	58.1223	6	NA
Col-0	+3LD	1	2107	75.3869	6	NA
Col-0	+3LD	1	2140	52.1079	6	NA
Col-0	+3LD	1	2165	60.8004	6	NA
Col-0	+3LD	1	2177	53.471	6	NA
Col-0	+3LD	1	2190	38.3854	6	NA
Col-0	+3LD	1	2201	49.1127	6	NA
Col-0	+3LD	1	2217	48.1492	6	NA
Col-0	+3LD	1	2221	49.7821	6	NA
Col-0	+3LD	1	2230	44.0513	6	NA
Col-0	+3LD	1	2239	49.642	6	NA
Col-0	+3LD	1	2247	71.2949	6	NA
Col-0	+3LD	1	2282	53.1884	6	NA
Col-0	+3LD	1	2294	43.6302	6	NA
Col-0	+3LD	1	2296	22.3456	6	NA
Col-0	+3LD	1	2298	28.6752	6	NA
Col-0	+3LD	1	1696	31.1232	7	NA
Col-0	+3LD	1	1715	39.3714	7	NA
Col-0	+3LD	1	1745	31.9236	7	NA
Col-0	+3LD	1	1751	52.3674	7	NA
Col-0	+3LD	1	1765	58.0668	7	NA
Col-0	+3LD	1	1769	70.4182	7	NA
Col-0	+3LD	1	1771	49.4686	7	NA
Col-0	+3LD	1	1793	53.7834	7	NA
Col-0	+3LD	1	1816	45.6394	7	NA
Col-0	+3LD	1	1823	45.5623	7	NA
Col-0	+3LD	1	1824	61.1153	7	NA
Col-0	+3LD	1	1844	67.3924	7	NA
Col-0	+3LD	1	1848	76.5531	7	NA
Col-0	+3LD	1	1850	44.3317	7	NA
Col-0	+3LD	1	1852	61.8949	7	NA
Col-0	+3LD	1	1859	53.1066	7	NA
Col-0	+3LD	1	1861	71.4806	7	NA
Col-0	+3LD	1	1864	37.6457	7	NA
Col-0	+3LD	1	1881	40.383	7	NA
Col-0	+3LD	1	1894	40.2028	7	NA
Col-0	+3LD	1	1921	55.7742	7	NA
Col-0	+3LD	1	1946	62.2734	7	NA
Col-0	+3LD	1	1961	48.0087	7	NA
Col-0	+3LD	1	1962	42.4199	7	NA
Col-0	+3LD	1	1988	46.1344	7	NA
Col-0	+3LD	1	1999	57.4772	7	NA
Col-0	+3LD	1	2000	40.2942	7	NA
Col-0	+3LD	1	2039	52.1437	7	NA
Col-0	+3LD	1	2162	57.2049	7	NA
Col-0	+3LD	1	2169	45.8358	7	NA
Col-0	+3LD	1	2200	47.6201	7	NA
Col-0	+3LD	1	2208	56.9922	7	NA
Col-0	+3LD	1	2212	41.1496	7	NA
Col-0	+3LD	1	2232	59.6362	7	NA
Col-0	+3LD	1	2235	55.8802	7	NA
Col-0	+3LD	1	2236	46.3808	7	NA
Col-0	+3LD	1	2250	30.7112	7	NA
Col-0	+3LD	1	2255	43.0158	7	NA
Col-0	+3LD	1	2325	43.5045	7	NA
Col-0	+3LD	1	1723	53.7188	8	NA
Col-0	+3LD	1	1743	78.1222	8	NA
Col-0	+3LD	1	1782	32.1182	8	NA
Col-0	+3LD	1	1810	56.1434	8	NA
Col-0	+3LD	1	1829	58.5762	8	NA
Col-0	+3LD	1	1837	37.507	8	NA
Col-0	+3LD	1	1878	54.0812	8	NA
Col-0	+3LD	1	1905	34.9313	8	NA
Col-0	+3LD	1	1907	41.3041	8	NA
Col-0	+3LD	1	1960	41.5357	8	NA
Col-0	+3LD	1	1969	75.7089	8	NA
Col-0	+3LD	1	2017	44.4156	8	NA
Col-0	+3LD	1	2024	36.9459	8	NA
Col-0	+3LD	1	2144	53.895	8	NA
Col-0	+3LD	1	2161	43.0103	8	NA
Col-0	+3LD	1	2166	29.6855	8	NA
Col-0	+3LD	1	2238	20.7348	8	NA
Col-0	+3LD	1	2249	44.7856	8	NA
Col-0	+3LD	1	2251	34.4348	8	NA
Col-0	+3LD	1	2300	50.9211	8	NA
Col-0	+3LD	1	2301	33.2165	8	NA
Col-0	+3LD	1	2304	64.5623	8	NA
Col-0	+3LD	1	2313	77.6769	8	NA
Col-0	+3LD	1	1665	44.367	9	NA
Col-0	+3LD	1	1670	75.6795	9	NA
Col-0	+3LD	1	1732	24.2765	9	NA
Col-0	+3LD	1	1775	41.7505	9	NA
Col-0	+3LD	1	1866	41.5529	9	NA
Col-0	+3LD	1	1915	62.709	9	NA
Col-0	+3LD	1	1952	55.5503	9	NA
Col-0	+3LD	1	1991	64.1747	9	NA
Col-0	+3LD	1	2013	37.5228	9	NA
Col-0	+3LD	1	2033	38.6416	9	NA
Col-0	+3LD	1	2117	64.0391	9	NA
Col-0	+3LD	1	2131	56.7768	9	NA
Col-0	+3LD	1	2141	44.2767	9	NA
Col-0	+3LD	1	2142	52.0552	9	NA
Col-0	+3LD	1	2218	54.0571	9	NA
Col-0	+3LD	1	2315	28.6862	9	NA
Col-0	+3LD	1	1672	40.9234	10	NA
Col-0	+3LD	1	1702	51.1601	10	NA
Col-0	+3LD	1	1984	59.5322	10	NA
Col-0	+3LD	1	2127	42.5696	10	NA
Col-0	+3LD	1	2198	68.4122	10	NA
Col-0	+3LD	1	2237	48.6124	10	NA
Col-0	+3LD	2	1091	39.0111	0	CZ
Col-0	+3LD	2	1092	41.6773	1	CZ
Col-0	+3LD	2	1087	46.6924	1	CZ
Col-0	+3LD	2	1090	49.2996	1	CZ
Col-0	+3LD	2	1043	50.8947	1	CZ
Col-0	+3LD	2	1038	65.3869	1	CZ
Col-0	+3LD	2	731	29.3536	2	CZ
Col-0	+3LD	2	1028	30.0708	2	CZ
Col-0	+3LD	2	1095	36.1751	2	CZ
Col-0	+3LD	2	801	41.1231	2	CZ
Col-0	+3LD	2	1093	41.3983	2	CZ
Col-0	+3LD	2	1088	44.7229	2	CZ
Col-0	+3LD	2	668	50.2657	2	CZ
Col-0	+3LD	2	585	60.6908	2	CZ
Col-0	+3LD	2	901	61.6404	2	CZ
Col-0	+3LD	2	1096	67.4564	2	CZ
Col-0	+3LD	2	1001	68.3011	2	CZ
Col-0	+3LD	2	838	71.6406	2	CZ
Col-0	+3LD	2	1098	23.2028	3	PZ
Col-0	+3LD	2	707	29.9278	3	PZ
Col-0	+3LD	2	579	37.3821	3	PZ
Col-0	+3LD	2	1050	38.2708	3	PZ
Col-0	+3LD	2	1097	43.5705	3	PZ
Col-0	+3LD	2	857	49.3676	3	PZ
Col-0	+3LD	2	937	51.409	3	PZ
Col-0	+3LD	2	584	51.5564	3	PZ
Col-0	+3LD	2	930	54.6628	3	PZ
Col-0	+3LD	2	956	54.713	3	PZ
Col-0	+3LD	2	1180	55.6038	3	PZ
Col-0	+3LD	2	664	58.1701	3	PZ
Col-0	+3LD	2	659	59.0238	3	PZ
Col-0	+3LD	2	1101	61.638	3	PZ
Col-0	+3LD	2	825	63.0322	3	PZ
Col-0	+3LD	2	1099	64.7419	3	PZ
Col-0	+3LD	2	1035	69.4998	3	PZ
Col-0	+3LD	2	1094	70.5594	3	PZ
Col-0	+3LD	2	973	71.6862	3	PZ
Col-0	+3LD	2	915	21.4784	4	PZ
Col-0	+3LD	2	1079	33.1263	4	PZ
Col-0	+3LD	2	567	33.3792	4	PZ
Col-0	+3LD	2	1181	33.593	4	PZ
Col-0	+3LD	2	675	37.3156	4	PZ
Col-0	+3LD	2	957	39.6466	4	PZ
Col-0	+3LD	2	588	40.9434	4	PZ
Col-0	+3LD	2	990	41.0962	4	PZ
Col-0	+3LD	2	1018	44.984	4	PZ
Col-0	+3LD	2	695	45.6474	4	PZ
Col-0	+3LD	2	821	47.5742	4	PZ
Col-0	+3LD	2	906	47.7193	4	PZ
Col-0	+3LD	2	898	48.1388	4	PZ
Col-0	+3LD	2	987	48.2339	4	PZ
Col-0	+3LD	2	581	49.3984	4	PZ
Col-0	+3LD	2	651	49.7445	4	PZ
Col-0	+3LD	2	1078	50.291	4	PZ
Col-0	+3LD	2	710	51.384	4	PZ
Col-0	+3LD	2	1102	52.0827	4	PZ
Col-0	+3LD	2	1176	56.0576	4	PZ
Col-0	+3LD	2	1178	60.8044	4	PZ
Col-0	+3LD	2	1073	61.738	4	PZ
Col-0	+3LD	2	865	66.8415	4	PZ
Col-0	+3LD	2	1100	67.3262	4	PZ
Col-0	+3LD	2	954	18.5933	5	PZ
Col-0	+3LD	2	932	27.8604	5	PZ
Col-0	+3LD	2	1103	30.3103	5	PZ
Col-0	+3LD	2	1037	32.7181	5	PZ
Col-0	+3LD	2	926	33.2521	5	PZ
Col-0	+3LD	2	893	33.6582	5	PZ
Col-0	+3LD	2	1013	34.5077	5	PZ
Col-0	+3LD	2	740	36.4018	5	PZ
Col-0	+3LD	2	1017	36.7343	5	PZ
Col-0	+3LD	2	1182	37.5927	5	PZ
Col-0	+3LD	2	989	37.6558	5	PZ
Col-0	+3LD	2	903	38.8304	5	PZ
Col-0	+3LD	2	921	39.2621	5	PZ
Col-0	+3LD	2	572	41.0824	5	PZ
Col-0	+3LD	2	892	41.5831	5	PZ
Col-0	+3LD	2	1044	42.6939	5	PZ
Col-0	+3LD	2	653	43.271	5	PZ
Col-0	+3LD	2	1190	45.0223	5	PZ
Col-0	+3LD	2	886	46.0002	5	PZ
Col-0	+3LD	2	996	52.1616	5	PZ
Col-0	+3LD	2	923	54.3134	5	PZ
Col-0	+3LD	2	804	54.9718	5	PZ
Col-0	+3LD	2	1049	55.1598	5	PZ
Col-0	+3LD	2	1020	55.3946	5	PZ
Col-0	+3LD	2	714	57.409	5	PZ
Col-0	+3LD	2	905	58.5177	5	PZ
Col-0	+3LD	2	872	65.186	5	PZ
Col-0	+3LD	2	603	69.5146	5	PZ
Col-0	+3LD	2	693	69.8848	5	PZ
Col-0	+3LD	2	656	74.5338	5	PZ
Col-0	+3LD	2	661	23.8953	6	NA
Col-0	+3LD	2	907	24.787	6	NA
Col-0	+3LD	2	890	27.0587	6	NA
Col-0	+3LD	2	885	30.8081	6	NA
Col-0	+3LD	2	1183	32.6216	6	NA
Col-0	+3LD	2	902	33.5312	6	NA
Col-0	+3LD	2	1083	33.5647	6	NA
Col-0	+3LD	2	959	37.4294	6	NA
Col-0	+3LD	2	568	38.5031	6	NA
Col-0	+3LD	2	1104	42.8934	6	NA
Col-0	+3LD	2	1002	43.1325	6	NA
Col-0	+3LD	2	660	44.2175	6	NA
Col-0	+3LD	2	1048	47.3436	6	NA
Col-0	+3LD	2	998	48.4622	6	NA
Col-0	+3LD	2	917	49.8028	6	NA
Col-0	+3LD	2	575	50.2128	6	NA
Col-0	+3LD	2	680	51.2213	6	NA
Col-0	+3LD	2	1034	51.2347	6	NA
Col-0	+3LD	2	881	51.2668	6	NA
Col-0	+3LD	2	1045	52.2134	6	NA
Col-0	+3LD	2	1069	53.8025	6	NA
Col-0	+3LD	2	867	56.3534	6	NA
Col-0	+3LD	2	894	57.7166	6	NA
Col-0	+3LD	2	1080	57.8607	6	NA
Col-0	+3LD	2	864	58.5922	6	NA
Col-0	+3LD	2	834	59.8992	6	NA
Col-0	+3LD	2	848	60.1078	6	NA
Col-0	+3LD	2	1063	60.8411	6	NA
Col-0	+3LD	2	853	60.994	6	NA
Col-0	+3LD	2	1025	61.7912	6	NA
Col-0	+3LD	2	597	64.5411	6	NA
Col-0	+3LD	2	949	67.905	6	NA
Col-0	+3LD	2	1179	69.9017	6	NA
Col-0	+3LD	2	944	27.8259	7	NA
Col-0	+3LD	2	936	29.0718	7	NA
Col-0	+3LD	2	895	34.4586	7	NA
Col-0	+3LD	2	773	38.6346	7	NA
Col-0	+3LD	2	863	38.88	7	NA
Col-0	+3LD	2	831	42.0397	7	NA
Col-0	+3LD	2	974	45.095	7	NA
Col-0	+3LD	2	819	45.4543	7	NA
Col-0	+3LD	2	812	49.0137	7	NA
Col-0	+3LD	2	576	49.5346	7	NA
Col-0	+3LD	2	948	52.2362	7	NA
Col-0	+3LD	2	991	53.4184	7	NA
Col-0	+3LD	2	849	53.8091	7	NA
Col-0	+3LD	2	862	54.4591	7	NA
Col-0	+3LD	2	596	54.8569	7	NA
Col-0	+3LD	2	786	57.1683	7	NA
Col-0	+3LD	2	900	60.6571	7	NA
Col-0	+3LD	2	837	61.449	7	NA
Col-0	+3LD	2	980	64.8838	7	NA
Col-0	+3LD	2	594	66.7465	7	NA
Col-0	+3LD	2	811	70.1943	7	NA
Col-0	+3LD	2	590	70.729	7	NA
Col-0	+3LD	2	1029	72.3755	7	NA
Col-0	+3LD	2	827	79.4911	7	NA
Col-0	+3LD	2	810	29.7948	8	NA
Col-0	+3LD	2	1030	32.1779	8	NA
Col-0	+3LD	2	1051	38.964	8	NA
Col-0	+3LD	2	1115	41.2498	8	NA
Col-0	+3LD	2	920	42.962	8	NA
Col-0	+3LD	2	756	44.3692	8	NA
Col-0	+3LD	2	845	44.3849	8	NA
Col-0	+3LD	2	635	47.5997	8	NA
Col-0	+3LD	2	630	48.507	8	NA
Col-0	+3LD	2	644	49.8508	8	NA
Col-0	+3LD	2	671	52.1102	8	NA
Col-0	+3LD	2	1184	53.8546	8	NA
Col-0	+3LD	2	869	61.4021	8	NA
Col-0	+3LD	2	718	65.9381	8	NA
Col-0	+3LD	2	896	66.6897	8	NA
Col-0	+3LD	2	826	68.3472	8	NA
Col-0	+3LD	2	621	71.4809	8	NA
Col-0	+3LD	2	1151	75.1156	8	NA
Col-0	+3LD	2	1150	28.4838	9	NA
Col-0	+3LD	2	1155	34.8518	9	NA
Col-0	+3LD	2	976	36.4773	9	NA
Col-0	+3LD	2	818	39.3237	9	NA
Col-0	+3LD	2	844	49.9111	9	NA
Col-0	+3LD	2	782	51.7438	9	NA
Col-0	+3LD	2	879	55.9479	9	NA
Col-0	+3LD	2	788	62.9786	9	NA
Col-0	+3LD	2	647	66.1828	9	NA
Col-0	+3LD	2	1074	72.1417	9	NA
Col-0	+3LD	2	620	82.7031	9	NA
Col-0	+3LD	2	765	96.1168	9	NA
Col-0	+3LD	2	1156	44.6585	10	NA
Col-0	+3LD	2	574	50.4655	10	NA
Col-0	+3LD	2	1157	54.8986	10	NA
Col-0	+3LD	2	792	74.9762	10	NA
Col-0	+3LD	2	1159	86.6352	10	NA
Col-0	+3LD	3	489	36.3824	0	CZ
Col-0	+3LD	3	488	22.6938	1	CZ
Col-0	+3LD	3	390	31.7205	1	CZ
Col-0	+3LD	3	70	48.3203	1	CZ
Col-0	+3LD	3	257	55.8433	1	CZ
Col-0	+3LD	3	410	60.9518	1	CZ
Col-0	+3LD	3	297	29.9663	2	CZ
Col-0	+3LD	3	239	42.0623	2	CZ
Col-0	+3LD	3	215	49.9463	2	CZ
Col-0	+3LD	3	107	50.9045	2	CZ
Col-0	+3LD	3	424	57.1393	2	CZ
Col-0	+3LD	3	175	57.2454	2	CZ
Col-0	+3LD	3	267	57.9884	2	CZ
Col-0	+3LD	3	282	58.136	2	CZ
Col-0	+3LD	3	288	58.1988	2	CZ
Col-0	+3LD	3	22	60.9941	2	CZ
Col-0	+3LD	3	402	27.8671	3	PZ
Col-0	+3LD	3	286	35.6232	3	PZ
Col-0	+3LD	3	391	39.3029	3	PZ
Col-0	+3LD	3	195	39.9816	3	PZ
Col-0	+3LD	3	138	43.5975	3	PZ
Col-0	+3LD	3	122	47.1499	3	PZ
Col-0	+3LD	3	453	47.9035	3	PZ
Col-0	+3LD	3	478	48.5659	3	PZ
Col-0	+3LD	3	164	52.7863	3	PZ
Col-0	+3LD	3	136	54.9425	3	PZ
Col-0	+3LD	3	300	55.0023	3	PZ
Col-0	+3LD	3	349	56.5893	3	PZ
Col-0	+3LD	3	103	56.6464	3	PZ
Col-0	+3LD	3	455	59.1123	3	PZ
Col-0	+3LD	3	448	60.7016	3	PZ
Col-0	+3LD	3	485	65.4958	3	PZ
Col-0	+3LD	3	486	68.809	3	PZ
Col-0	+3LD	3	192	27.1239	4	PZ
Col-0	+3LD	3	93	27.2167	4	PZ
Col-0	+3LD	3	558	35.1955	4	PZ
Col-0	+3LD	3	196	37.2141	4	PZ
Col-0	+3LD	3	353	38.0124	4	PZ
Col-0	+3LD	3	148	38.1308	4	PZ
Col-0	+3LD	3	260	38.237	4	PZ
Col-0	+3LD	3	313	42.6475	4	PZ
Col-0	+3LD	3	350	43.8667	4	PZ
Col-0	+3LD	3	417	51.0731	4	PZ
Col-0	+3LD	3	66	51.5463	4	PZ
Col-0	+3LD	3	342	52.1138	4	PZ
Col-0	+3LD	3	296	56.0398	4	PZ
Col-0	+3LD	3	142	56.7403	4	PZ
Col-0	+3LD	3	80	58.3118	4	PZ
Col-0	+3LD	3	287	60.6907	4	PZ
Col-0	+3LD	3	160	67.0625	4	PZ
Col-0	+3LD	3	456	72.1569	4	PZ
Col-0	+3LD	3	247	72.5885	4	PZ
Col-0	+3LD	3	484	74.0945	4	PZ
Col-0	+3LD	3	476	26.4719	5	PZ
Col-0	+3LD	3	145	28.0615	5	PZ
Col-0	+3LD	3	559	31.1816	5	PZ
Col-0	+3LD	3	30	32.812	5	PZ
Col-0	+3LD	3	336	33.9452	5	PZ
Col-0	+3LD	3	52	44.0484	5	PZ
Col-0	+3LD	3	556	44.9866	5	PZ
Col-0	+3LD	3	75	46.0116	5	PZ
Col-0	+3LD	3	536	50.3059	5	PZ
Col-0	+3LD	3	339	50.6338	5	PZ
Col-0	+3LD	3	457	53.7156	5	PZ
Col-0	+3LD	3	121	54.1105	5	PZ
Col-0	+3LD	3	227	54.3075	5	PZ
Col-0	+3LD	3	289	56.8274	5	PZ
Col-0	+3LD	3	51	57.2271	5	PZ
Col-0	+3LD	3	166	57.8886	5	PZ
Col-0	+3LD	3	134	58.4925	5	PZ
Col-0	+3LD	3	487	59.0056	5	PZ
Col-0	+3LD	3	150	59.5208	5	PZ
Col-0	+3LD	3	10	59.6699	5	PZ
Col-0	+3LD	3	467	60.84	5	PZ
Col-0	+3LD	3	347	62.7432	5	PZ
Col-0	+3LD	3	130	64.1833	5	PZ
Col-0	+3LD	3	264	65.1992	5	PZ
Col-0	+3LD	3	61	65.4025	5	PZ
Col-0	+3LD	3	234	20.0724	6	NA
Col-0	+3LD	3	198	26.9244	6	NA
Col-0	+3LD	3	259	27.653	6	NA
Col-0	+3LD	3	280	28.5375	6	NA
Col-0	+3LD	3	326	31.224	6	NA
Col-0	+3LD	3	112	35.3793	6	NA
Col-0	+3LD	3	477	35.7981	6	NA
Col-0	+3LD	3	535	36.4166	6	NA
Col-0	+3LD	3	47	38.9833	6	NA
Col-0	+3LD	3	157	39.2822	6	NA
Col-0	+3LD	3	495	40.001	6	NA
Col-0	+3LD	3	542	40.1454	6	NA
Col-0	+3LD	3	537	40.3262	6	NA
Col-0	+3LD	3	463	42.5756	6	NA
Col-0	+3LD	3	240	42.7393	6	NA
Col-0	+3LD	3	356	43.9148	6	NA
Col-0	+3LD	3	543	44.1408	6	NA
Col-0	+3LD	3	430	44.3945	6	NA
Col-0	+3LD	3	265	47.5789	6	NA
Col-0	+3LD	3	534	48.4245	6	NA
Col-0	+3LD	3	12	48.8262	6	NA
Col-0	+3LD	3	557	49.8288	6	NA
Col-0	+3LD	3	101	55.8852	6	NA
Col-0	+3LD	3	458	56.6631	6	NA
Col-0	+3LD	3	21	57.8686	6	NA
Col-0	+3LD	3	459	58.075	6	NA
Col-0	+3LD	3	527	59.7598	6	NA
Col-0	+3LD	3	305	59.9	6	NA
Col-0	+3LD	3	124	62.0113	6	NA
Col-0	+3LD	3	299	64.4896	6	NA
Col-0	+3LD	3	216	64.6588	6	NA
Col-0	+3LD	3	45	69.1683	6	NA
Col-0	+3LD	3	433	72.6753	6	NA
Col-0	+3LD	3	420	24.6895	7	NA
Col-0	+3LD	3	91	34.6399	7	NA
Col-0	+3LD	3	135	38.338	7	NA
Col-0	+3LD	3	137	39.396	7	NA
Col-0	+3LD	3	474	41.6288	7	NA
Col-0	+3LD	3	170	42.733	7	NA
Col-0	+3LD	3	233	42.7701	7	NA
Col-0	+3LD	3	436	43.4723	7	NA
Col-0	+3LD	3	427	43.7334	7	NA
Col-0	+3LD	3	110	46.7296	7	NA
Col-0	+3LD	3	540	47.5733	7	NA
Col-0	+3LD	3	301	48.9338	7	NA
Col-0	+3LD	3	524	48.9678	7	NA
Col-0	+3LD	3	544	49.4578	7	NA
Col-0	+3LD	3	155	49.551	7	NA
Col-0	+3LD	3	462	49.814	7	NA
Col-0	+3LD	3	547	53.7592	7	NA
Col-0	+3LD	3	18	59.0005	7	NA
Col-0	+3LD	3	334	62.6235	7	NA
Col-0	+3LD	3	268	63.0157	7	NA
Col-0	+3LD	3	292	66.3227	7	NA
Col-0	+3LD	3	454	66.612	7	NA
Col-0	+3LD	3	541	68.9562	7	NA
Col-0	+3LD	3	173	70.3575	7	NA
Col-0	+3LD	3	538	76.8396	7	NA
Col-0	+3LD	3	26	77.2651	7	NA
Col-0	+3LD	3	539	80.3662	7	NA
Col-0	+3LD	3	162	31.4712	8	NA
Col-0	+3LD	3	59	35.5666	8	NA
Col-0	+3LD	3	383	35.6713	8	NA
Col-0	+3LD	3	546	35.9219	8	NA
Col-0	+3LD	3	552	42.9095	8	NA
Col-0	+3LD	3	429	44.6111	8	NA
Col-0	+3LD	3	491	45.2404	8	NA
Col-0	+3LD	3	517	45.2896	8	NA
Col-0	+3LD	3	236	46.2752	8	NA
Col-0	+3LD	3	58	48.6974	8	NA
Col-0	+3LD	3	43	49.999	8	NA
Col-0	+3LD	3	523	50.669	8	NA
Col-0	+3LD	3	423	51.4282	8	NA
Col-0	+3LD	3	520	54.9717	8	NA
Col-0	+3LD	3	548	57.0109	8	NA
Col-0	+3LD	3	525	57.3442	8	NA
Col-0	+3LD	3	442	59.3352	8	NA
Col-0	+3LD	3	516	60.2666	8	NA
Col-0	+3LD	3	293	63.4129	8	NA
Col-0	+3LD	3	465	67.4887	8	NA
Col-0	+3LD	3	152	31.6464	9	NA
Col-0	+3LD	3	549	36.3686	9	NA
Col-0	+3LD	3	551	45.0666	9	NA
Col-0	+3LD	3	351	52.892	9	NA
Col-0	+3LD	3	204	53.5811	9	NA
Col-0	+3LD	3	515	63.0091	9	NA
Col-0	+3LD	3	521	75.4606	9	NA
Col-0	2wSD	4	268	35.1496	0	CZ
Col-0	2wSD	4	92	21.7305	1	CZ
Col-0	2wSD	4	167	23.2987	1	CZ
Col-0	2wSD	4	161	30.3127	1	CZ
Col-0	2wSD	4	159	35.8746	1	CZ
Col-0	2wSD	4	272	40.6817	1	CZ
Col-0	2wSD	4	154	43.5472	1	CZ
Col-0	2wSD	4	257	17.0758	2	CZ
Col-0	2wSD	4	145	17.5108	2	CZ
Col-0	2wSD	4	172	22.429	2	CZ
Col-0	2wSD	4	147	29.0165	2	CZ
Col-0	2wSD	4	146	29.8885	2	CZ
Col-0	2wSD	4	263	30.0636	2	CZ
Col-0	2wSD	4	275	31.6883	2	CZ
Col-0	2wSD	4	24	31.8058	2	CZ
Col-0	2wSD	4	169	32.3811	2	CZ
Col-0	2wSD	4	59	32.7662	2	CZ
Col-0	2wSD	4	10	38.6687	2	CZ
Col-0	2wSD	4	141	45.1806	2	CZ
Col-0	2wSD	4	264	23.2436	3	PZ
Col-0	2wSD	4	286	24.4532	3	PZ
Col-0	2wSD	4	137	25.5041	3	PZ
Col-0	2wSD	4	6	27.4712	3	PZ
Col-0	2wSD	4	274	29.961	3	PZ
Col-0	2wSD	4	267	31.7394	3	PZ
Col-0	2wSD	4	2057	32.4323	3	PZ
Col-0	2wSD	4	2094	32.8195	3	PZ
Col-0	2wSD	4	40	32.8494	3	PZ
Col-0	2wSD	4	253	37.7275	3	PZ
Col-0	2wSD	4	187	37.9435	3	PZ
Col-0	2wSD	4	2077	39.0133	3	PZ
Col-0	2wSD	4	2044	48.7758	3	PZ
Col-0	2wSD	4	150	22.8264	4	PZ
Col-0	2wSD	4	165	26.7545	4	PZ
Col-0	2wSD	4	265	27.4193	4	PZ
Col-0	2wSD	4	183	35.5001	4	PZ
Col-0	2wSD	4	138	36.0704	4	PZ
Col-0	2wSD	4	256	41.0064	4	PZ
Col-0	2wSD	4	298	48.7877	4	PZ
Col-0	2wSD	4	258	24.9951	5	PZ
Col-0	2wSD	4	255	26.7134	5	PZ
Col-0	2wSD	4	266	30.9031	5	PZ
Col-0	2wSD	4	25	30.9915	5	PZ
Col-0	2wSD	4	246	44.1217	5	PZ
Col-0	2wSD	4	2059	24.0001	6	NA
Col-0	2wSD	4	2060	39.3399	6	NA
Col-0	2wSD	5	48	35.7229	0	CZ
Col-0	2wSD	5	229	22.0643	1	CZ
Col-0	2wSD	5	160	25.4506	1	CZ
Col-0	2wSD	5	198	28.514	1	CZ
Col-0	2wSD	5	74	28.5511	1	CZ
Col-0	2wSD	5	101	35.5342	1	CZ
Col-0	2wSD	5	273	37.1028	1	CZ
Col-0	2wSD	5	2041	46.4487	1	CZ
Col-0	2wSD	5	159	14.8658	2	CZ
Col-0	2wSD	5	23	18.549	2	CZ
Col-0	2wSD	5	152	19.4744	2	CZ
Col-0	2wSD	5	146	24.3312	2	CZ
Col-0	2wSD	5	108	32.9151	2	CZ
Col-0	2wSD	5	70	36.5076	2	CZ
Col-0	2wSD	5	274	36.921	2	CZ
Col-0	2wSD	5	230	37.6115	2	CZ
Col-0	2wSD	5	77	38.2061	2	CZ
Col-0	2wSD	5	245	38.8713	2	CZ
Col-0	2wSD	5	272	42.0727	2	CZ
Col-0	2wSD	5	112	45.5282	2	CZ
Col-0	2wSD	5	289	13.2389	3	PZ
Col-0	2wSD	5	214	21.6545	3	PZ
Col-0	2wSD	5	275	22.1141	3	PZ
Col-0	2wSD	5	281	25.1224	3	PZ
Col-0	2wSD	5	280	27.0628	3	PZ
Col-0	2wSD	5	224	30.5891	3	PZ
Col-0	2wSD	5	134	31.9448	3	PZ
Col-0	2wSD	5	282	32.9529	3	PZ
Col-0	2wSD	5	1984	33.2346	3	PZ
Col-0	2wSD	5	206	33.3692	3	PZ
Col-0	2wSD	5	271	33.4931	3	PZ
Col-0	2wSD	5	67	33.7708	3	PZ
Col-0	2wSD	5	277	36.5968	3	PZ
Col-0	2wSD	5	290	38.4154	3	PZ
Col-0	2wSD	5	151	40.8514	3	PZ
Col-0	2wSD	5	1985	42.5342	3	PZ
Col-0	2wSD	5	2014	21.735	4	PZ
Col-0	2wSD	5	1977	25.4555	4	PZ
Col-0	2wSD	5	2020	25.7962	4	PZ
Col-0	2wSD	5	140	26.0037	4	PZ
Col-0	2wSD	5	1978	26.6245	4	PZ
Col-0	2wSD	5	288	28.1597	4	PZ
Col-0	2wSD	5	57	29.0643	4	PZ
Col-0	2wSD	5	284	32.1598	4	PZ
Col-0	2wSD	5	283	32.9391	4	PZ
Col-0	2wSD	5	2028	32.9655	4	PZ
Col-0	2wSD	5	285	32.9944	4	PZ
Col-0	2wSD	5	189	33.9145	4	PZ
Col-0	2wSD	5	2030	41.9146	4	PZ
Col-0	2wSD	5	205	42.3406	4	PZ
Col-0	2wSD	5	2025	14.4114	5	PZ
Col-0	2wSD	5	2027	18.4624	5	PZ
Col-0	2wSD	5	232	21.503	5	PZ
Col-0	2wSD	5	1980	28.0028	5	PZ
Col-0	2wSD	5	2039	29.1999	5	PZ
Col-0	2wSD	5	1992	33.1841	5	PZ
Col-0	2wSD	5	2031	40.5863	5	PZ
Col-0	2wSD	5	1981	24.9017	6	NA
Col-0	2wSD	5	2033	33.8538	6	NA
Col-0	2wSD	5	2034	48.3461	6	NA
Col-0	2wSD	5	2035	57.3878	6	NA
Col-0	2wSD	5	2018	30.4144	7	NA
Col-0	+5LD	2	2437	29.8209	0	CZ
Col-0	+5LD	2	2449	36.017	1	CZ
Col-0	+5LD	2	2598	47.321	1	CZ
Col-0	+5LD	2	2660	54.3951	1	CZ
Col-0	+5LD	2	2696	30.6639	1	CZ
Col-0	+5LD	2	2841	30.6953	1	CZ
Col-0	+5LD	2	2130	51.1938	2	CZ
Col-0	+5LD	2	2233	41.579	2	CZ
Col-0	+5LD	2	2274	44.5017	2	CZ
Col-0	+5LD	2	2381	34.6465	2	CZ
Col-0	+5LD	2	2402	27.7936	2	CZ
Col-0	+5LD	2	2518	43.2048	2	CZ
Col-0	+5LD	2	2697	30.4257	2	CZ
Col-0	+5LD	2	2813	53.9809	2	CZ
Col-0	+5LD	2	2846	67.1452	2	CZ
Col-0	+5LD	2	2874	48.4634	2	CZ
Col-0	+5LD	2	2889	35.9296	2	CZ
Col-0	+5LD	2	2123	61.1392	3	PZ
Col-0	+5LD	2	2184	35.1214	3	PZ
Col-0	+5LD	2	2198	59.9491	3	PZ
Col-0	+5LD	2	2394	34.433	3	PZ
Col-0	+5LD	2	2415	43.1084	3	PZ
Col-0	+5LD	2	2482	32.5243	3	PZ
Col-0	+5LD	2	2539	42.5534	3	PZ
Col-0	+5LD	2	2644	28.5104	3	PZ
Col-0	+5LD	2	2650	55.1465	3	PZ
Col-0	+5LD	2	2727	69.2391	3	PZ
Col-0	+5LD	2	2783	49.4231	3	PZ
Col-0	+5LD	2	2805	49.1931	3	PZ
Col-0	+5LD	2	2827	36.2784	3	PZ
Col-0	+5LD	2	2859	59.5317	3	PZ
Col-0	+5LD	2	2890	24.6726	3	PZ
Col-0	+5LD	2	3024	38.202	3	PZ
Col-0	+5LD	2	3026	57.7402	3	PZ
Col-0	+5LD	2	2183	31.159	4	PZ
Col-0	+5LD	2	2303	39.4824	4	PZ
Col-0	+5LD	2	2360	54.4671	4	PZ
Col-0	+5LD	2	2375	47.6494	4	PZ
Col-0	+5LD	2	2388	34.0202	4	PZ
Col-0	+5LD	2	2471	37.9037	4	PZ
Col-0	+5LD	2	2552	37.3667	4	PZ
Col-0	+5LD	2	2575	46.1666	4	PZ
Col-0	+5LD	2	2662	68.8428	4	PZ
Col-0	+5LD	2	2714	39.9574	4	PZ
Col-0	+5LD	2	2804	26.1447	4	PZ
Col-0	+5LD	2	2826	36.4367	4	PZ
Col-0	+5LD	2	2905	38.5001	4	PZ
Col-0	+5LD	2	2907	30.5787	4	PZ
Col-0	+5LD	2	2920	41.4625	4	PZ
Col-0	+5LD	2	2921	32.3758	4	PZ
Col-0	+5LD	2	2922	56.5855	4	PZ
Col-0	+5LD	2	2924	37.6388	4	PZ
Col-0	+5LD	2	2925	43.7973	4	PZ
Col-0	+5LD	2	2926	43.0462	4	PZ
Col-0	+5LD	2	2946	68.0882	4	PZ
Col-0	+5LD	2	2948	39.7702	4	PZ
Col-0	+5LD	2	2952	32.4637	4	PZ
Col-0	+5LD	2	3025	42.5759	4	PZ
Col-0	+5LD	2	3027	52.5224	4	PZ
Col-0	+5LD	2	3028	64.0659	4	PZ
Col-0	+5LD	2	2175	31.151	5	PZ
Col-0	+5LD	2	2203	51.7439	5	PZ
Col-0	+5LD	2	2204	57.4206	5	PZ
Col-0	+5LD	2	2227	31.7036	5	PZ
Col-0	+5LD	2	2293	57.5073	5	PZ
Col-0	+5LD	2	2376	46.074	5	PZ
Col-0	+5LD	2	2387	41.3406	5	PZ
Col-0	+5LD	2	2478	60.4192	5	PZ
Col-0	+5LD	2	2540	43.3981	5	PZ
Col-0	+5LD	2	2568	40.8565	5	PZ
Col-0	+5LD	2	2573	46.4793	5	PZ
Col-0	+5LD	2	2669	53.7915	5	PZ
Col-0	+5LD	2	2680	69.3567	5	PZ
Col-0	+5LD	2	2706	72.2347	5	PZ
Col-0	+5LD	2	2740	58.2243	5	PZ
Col-0	+5LD	2	2771	72.4436	5	PZ
Col-0	+5LD	2	2773	72.3582	5	PZ
Col-0	+5LD	2	2782	50.4559	5	PZ
Col-0	+5LD	2	2799	37.828	5	PZ
Col-0	+5LD	2	2876	56.5211	5	PZ
Col-0	+5LD	2	2904	48.0445	5	PZ
Col-0	+5LD	2	2915	62.425	5	PZ
Col-0	+5LD	2	2919	48.5313	5	PZ
Col-0	+5LD	2	2923	48.3013	5	PZ
Col-0	+5LD	2	2927	37.8079	5	PZ
Col-0	+5LD	2	2928	53.9586	5	PZ
Col-0	+5LD	2	2947	30.6572	5	PZ
Col-0	+5LD	2	2955	56.8716	5	PZ
Col-0	+5LD	2	3048	33.6022	5	PZ
Col-0	+5LD	2	3049	47.7755	5	PZ
Col-0	+5LD	2	3051	81.7598	5	PZ
Col-0	+5LD	2	2102	64.8319	6	NA
Col-0	+5LD	2	2156	26.0649	6	NA
Col-0	+5LD	2	2219	45.8685	6	NA
Col-0	+5LD	2	2236	39.3288	6	NA
Col-0	+5LD	2	2242	59.3526	6	NA
Col-0	+5LD	2	2280	35.0981	6	NA
Col-0	+5LD	2	2291	51.2967	6	NA
Col-0	+5LD	2	2295	48.9774	6	NA
Col-0	+5LD	2	2306	45.0747	6	NA
Col-0	+5LD	2	2315	23.2726	6	NA
Col-0	+5LD	2	2353	51.7005	6	NA
Col-0	+5LD	2	2426	51.5693	6	NA
Col-0	+5LD	2	2461	50.4924	6	NA
Col-0	+5LD	2	2508	57.3052	6	NA
Col-0	+5LD	2	2516	31.6631	6	NA
Col-0	+5LD	2	2519	51.5442	6	NA
Col-0	+5LD	2	2581	53.6173	6	NA
Col-0	+5LD	2	2588	60.6628	6	NA
Col-0	+5LD	2	2735	58.9674	6	NA
Col-0	+5LD	2	2741	44.1034	6	NA
Col-0	+5LD	2	2753	43.5754	6	NA
Col-0	+5LD	2	2774	42.9104	6	NA
Col-0	+5LD	2	2784	49.6046	6	NA
Col-0	+5LD	2	2807	21.7661	6	NA
Col-0	+5LD	2	2819	64.2897	6	NA
Col-0	+5LD	2	2825	61.1384	6	NA
Col-0	+5LD	2	2844	55.8687	6	NA
Col-0	+5LD	2	2914	70.0861	6	NA
Col-0	+5LD	2	2916	58.2587	6	NA
Col-0	+5LD	2	2918	58.0755	6	NA
Col-0	+5LD	2	2929	58.7101	6	NA
Col-0	+5LD	2	2956	64.3648	6	NA
Col-0	+5LD	2	3047	40.9108	6	NA
Col-0	+5LD	2	3050	34.7685	6	NA
Col-0	+5LD	2	2166	49.473	7	NA
Col-0	+5LD	2	2234	51.6034	7	NA
Col-0	+5LD	2	2253	31.3897	7	NA
Col-0	+5LD	2	2268	35.1809	7	NA
Col-0	+5LD	2	2272	45.2777	7	NA
Col-0	+5LD	2	2297	52.4236	7	NA
Col-0	+5LD	2	2326	51.0723	7	NA
Col-0	+5LD	2	2331	42.2137	7	NA
Col-0	+5LD	2	2457	42.2632	7	NA
Col-0	+5LD	2	2462	65.4063	7	NA
Col-0	+5LD	2	2530	46.9907	7	NA
Col-0	+5LD	2	2559	35.3934	7	NA
Col-0	+5LD	2	2567	38.0275	7	NA
Col-0	+5LD	2	2578	33.6499	7	NA
Col-0	+5LD	2	2597	29.8215	7	NA
Col-0	+5LD	2	2649	33.3212	7	NA
Col-0	+5LD	2	2730	50.7645	7	NA
Col-0	+5LD	2	2734	39.584	7	NA
Col-0	+5LD	2	2752	58.1456	7	NA
Col-0	+5LD	2	2755	31.0686	7	NA
Col-0	+5LD	2	2762	26.0431	7	NA
Col-0	+5LD	2	2775	45.4107	7	NA
Col-0	+5LD	2	2802	29.737	7	NA
Col-0	+5LD	2	2808	57.6868	7	NA
Col-0	+5LD	2	2816	34.4977	7	NA
Col-0	+5LD	2	2833	66.4433	7	NA
Col-0	+5LD	2	2894	30.9237	7	NA
Col-0	+5LD	2	2912	30.1318	7	NA
Col-0	+5LD	2	2913	35.7664	7	NA
Col-0	+5LD	2	2917	47.7347	7	NA
Col-0	+5LD	2	2930	41.7215	7	NA
Col-0	+5LD	2	2957	34.4707	7	NA
Col-0	+5LD	2	2959	74.8867	7	NA
Col-0	+5LD	2	2975	62.8524	7	NA
Col-0	+5LD	2	3029	43.3957	7	NA
Col-0	+5LD	2	3030	51.5684	7	NA
Col-0	+5LD	2	3046	55.5042	7	NA
Col-0	+5LD	2	2116	32.4306	8	NA
Col-0	+5LD	2	2142	47.1739	8	NA
Col-0	+5LD	2	2158	61.6074	8	NA
Col-0	+5LD	2	2179	37.2545	8	NA
Col-0	+5LD	2	2186	45.0731	8	NA
Col-0	+5LD	2	2347	59.6737	8	NA
Col-0	+5LD	2	2352	65.0333	8	NA
Col-0	+5LD	2	2358	40.9125	8	NA
Col-0	+5LD	2	2361	47.4798	8	NA
Col-0	+5LD	2	2393	33.952	8	NA
Col-0	+5LD	2	2414	28.0433	8	NA
Col-0	+5LD	2	2486	57.25	8	NA
Col-0	+5LD	2	2497	64.5848	8	NA
Col-0	+5LD	2	2507	44.5201	8	NA
Col-0	+5LD	2	2526	34.5687	8	NA
Col-0	+5LD	2	2527	40.5807	8	NA
Col-0	+5LD	2	2529	60.9667	8	NA
Col-0	+5LD	2	2561	41.597	8	NA
Col-0	+5LD	2	2572	43.5068	8	NA
Col-0	+5LD	2	2622	44.0176	8	NA
Col-0	+5LD	2	2676	63.6416	8	NA
Col-0	+5LD	2	2705	54.1953	8	NA
Col-0	+5LD	2	2715	35.5614	8	NA
Col-0	+5LD	2	2746	44.288	8	NA
Col-0	+5LD	2	2790	58.9253	8	NA
Col-0	+5LD	2	2811	44.6663	8	NA
Col-0	+5LD	2	2870	40.5768	8	NA
Col-0	+5LD	2	2871	43.1245	8	NA
Col-0	+5LD	2	2888	46.3817	8	NA
Col-0	+5LD	2	2893	56.3351	8	NA
Col-0	+5LD	2	2911	41.9709	8	NA
Col-0	+5LD	2	2931	56.1802	8	NA
Col-0	+5LD	2	2958	42.9997	8	NA
Col-0	+5LD	2	2960	21.9569	8	NA
Col-0	+5LD	2	3002	55.6959	8	NA
Col-0	+5LD	2	2207	28.0145	9	NA
Col-0	+5LD	2	2254	55.8247	9	NA
Col-0	+5LD	2	2273	63.6728	9	NA
Col-0	+5LD	2	2283	56.2315	9	NA
Col-0	+5LD	2	2285	39.4686	9	NA
Col-0	+5LD	2	2287	57.8032	9	NA
Col-0	+5LD	2	2294	32.1278	9	NA
Col-0	+5LD	2	2299	46.6678	9	NA
Col-0	+5LD	2	2337	47.9682	9	NA
Col-0	+5LD	2	2350	38.3498	9	NA
Col-0	+5LD	2	2383	30.8951	9	NA
Col-0	+5LD	2	2436	43.8792	9	NA
Col-0	+5LD	2	2484	35.2174	9	NA
Col-0	+5LD	2	2506	33.7995	9	NA
Col-0	+5LD	2	2520	30.9889	9	NA
Col-0	+5LD	2	2546	66.2685	9	NA
Col-0	+5LD	2	2553	41.5279	9	NA
Col-0	+5LD	2	2570	41.5271	9	NA
Col-0	+5LD	2	2601	21.9014	9	NA
Col-0	+5LD	2	2748	45.8956	9	NA
Col-0	+5LD	2	2751	47.2278	9	NA
Col-0	+5LD	2	2757	40.915	9	NA
Col-0	+5LD	2	2823	44.597	9	NA
Col-0	+5LD	2	2899	44.3206	9	NA
Col-0	+5LD	2	2902	51.6604	9	NA
Col-0	+5LD	2	2910	34.6322	9	NA
Col-0	+5LD	2	2961	41.6658	9	NA
Col-0	+5LD	2	2962	48.5287	9	NA
Col-0	+5LD	2	2978	54.4504	9	NA
Col-0	+5LD	2	2985	40.6852	9	NA
Col-0	+5LD	2	2996	59.6582	9	NA
Col-0	+5LD	2	3031	45.8829	9	NA
Col-0	+5LD	2	3035	51.7446	9	NA
Col-0	+5LD	2	2221	57.6943	10	NA
Col-0	+5LD	2	2307	38.3624	10	NA
Col-0	+5LD	2	2357	83.5169	10	NA
Col-0	+5LD	2	2411	56.5397	10	NA
Col-0	+5LD	2	2444	38.0575	10	NA
Col-0	+5LD	2	2454	46.4625	10	NA
Col-0	+5LD	2	2459	33.7964	10	NA
Col-0	+5LD	2	2464	60.4863	10	NA
Col-0	+5LD	2	2488	56.2846	10	NA
Col-0	+5LD	2	2501	71.9162	10	NA
Col-0	+5LD	2	2502	35.4526	10	NA
Col-0	+5LD	2	2513	33.8416	10	NA
Col-0	+5LD	2	2616	39.6742	10	NA
Col-0	+5LD	2	2642	38.0928	10	NA
Col-0	+5LD	2	2665	31.8722	10	NA
Col-0	+5LD	2	2756	35.8557	10	NA
Col-0	+5LD	2	2767	26.7205	10	NA
Col-0	+5LD	2	2776	31.6389	10	NA
Col-0	+5LD	2	2791	59.1196	10	NA
Col-0	+5LD	2	2817	57.846	10	NA
Col-0	+5LD	2	2865	52.9017	10	NA
Col-0	+5LD	2	2979	37.1826	10	NA
Col-0	+5LD	2	3032	36.1673	10	NA
Col-0	+5LD	2	3036	35.8926	10	NA
Col-0	+5LD	2	2144	40.388	11	NA
Col-0	+5LD	2	2150	55.8388	11	NA
Col-0	+5LD	2	2152	36.5061	11	NA
Col-0	+5LD	2	2167	31.7163	11	NA
Col-0	+5LD	2	2245	59.5793	11	NA
Col-0	+5LD	2	2250	40.4371	11	NA
Col-0	+5LD	2	2483	35.3442	11	NA
Col-0	+5LD	2	2511	50.17	11	NA
Col-0	+5LD	2	2512	51.6254	11	NA
Col-0	+5LD	2	2535	35.6444	11	NA
Col-0	+5LD	2	2569	44.644	11	NA
Col-0	+5LD	2	2718	29.5547	11	NA
Col-0	+5LD	2	2861	28.3983	11	NA
Col-0	+5LD	2	2908	48.1461	11	NA
Col-0	+5LD	2	3037	30.6875	11	NA
Col-0	+5LD	2	3038	28.5007	11	NA
Col-0	+5LD	2	3056	61.457	11	NA
Col-0	+5LD	2	2292	40.2599	12	NA
Col-0	+5LD	2	2302	27.4108	12	NA
Col-0	+5LD	2	2419	55.6648	12	NA
Col-0	+5LD	2	2639	39.2095	12	NA
Col-0	+5LD	2	2707	63.8182	12	NA
Col-0	+5LD	2	2750	49.0989	12	NA
Col-0	+5LD	2	2897	49.5841	12	NA
Col-0	+5LD	2	2898	53.4426	12	NA
Col-0	+5LD	2	3060	39.8696	12	NA
Col-0	+5LD	2	2408	47.3431	13	NA
Col-0	+5LD	2	2571	52.7601	13	NA
Col-0	+5LD	2	2675	39.6381	13	NA
Col-0	+5LD	2	2895	60.5009	13	NA
Col-0	+5LD	2	3061	31.4638	13	NA
Col-0	+5LD	2	2606	53.2506	14	NA
Col-0	+5LD	2	2638	54.0546	14	NA
Col-0	+5LD	2	2878	52.7297	14	NA
Col-0	+5LD	3	1164	35.8596	0	CZ
Col-0	+5LD	3	362	50.2311	1	CZ
Col-0	+5LD	3	1162	63.3183	1	CZ
Col-0	+5LD	3	1163	33.2834	1	CZ
Col-0	+5LD	3	1165	53.6152	1	CZ
Col-0	+5LD	3	1166	40.114	1	CZ
Col-0	+5LD	3	1167	38.9374	1	CZ
Col-0	+5LD	3	185	63.6558	2	CZ
Col-0	+5LD	3	211	67.4569	2	CZ
Col-0	+5LD	3	237	54.2328	2	CZ
Col-0	+5LD	3	283	57.7239	2	CZ
Col-0	+5LD	3	322	48.7271	2	CZ
Col-0	+5LD	3	965	76.3552	2	CZ
Col-0	+5LD	3	995	42.2143	2	CZ
Col-0	+5LD	3	1160	37.6741	2	CZ
Col-0	+5LD	3	1161	55.6062	2	CZ
Col-0	+5LD	3	1168	54.8907	2	CZ
Col-0	+5LD	3	3120	59.4865	2	CZ
Col-0	+5LD	3	175	42.9014	3	PZ
Col-0	+5LD	3	190	30.1812	3	PZ
Col-0	+5LD	3	200	57.479	3	PZ
Col-0	+5LD	3	244	44.884	3	PZ
Col-0	+5LD	3	281	49.4788	3	PZ
Col-0	+5LD	3	316	43.1156	3	PZ
Col-0	+5LD	3	363	68.7636	3	PZ
Col-0	+5LD	3	393	44.2783	3	PZ
Col-0	+5LD	3	394	35.2708	3	PZ
Col-0	+5LD	3	920	51.5917	3	PZ
Col-0	+5LD	3	943	66.141	3	PZ
Col-0	+5LD	3	974	35.7954	3	PZ
Col-0	+5LD	3	1002	66.8012	3	PZ
Col-0	+5LD	3	1017	52.1883	3	PZ
Col-0	+5LD	3	1038	33.9618	3	PZ
Col-0	+5LD	3	1158	80.9436	3	PZ
Col-0	+5LD	3	1169	52.9697	3	PZ
Col-0	+5LD	3	1170	42.8727	3	PZ
Col-0	+5LD	3	3121	27.7978	3	PZ
Col-0	+5LD	3	167	56.6446	4	PZ
Col-0	+5LD	3	174	60.2085	4	PZ
Col-0	+5LD	3	225	72.368	4	PZ
Col-0	+5LD	3	260	68.9608	4	PZ
Col-0	+5LD	3	282	27.3401	4	PZ
Col-0	+5LD	3	305	51.2328	4	PZ
Col-0	+5LD	3	315	60.911	4	PZ
Col-0	+5LD	3	324	41.8159	4	PZ
Col-0	+5LD	3	387	64.0088	4	PZ
Col-0	+5LD	3	404	31.5164	4	PZ
Col-0	+5LD	3	879	76.6582	4	PZ
Col-0	+5LD	3	984	60.0496	4	PZ
Col-0	+5LD	3	1010	61.4115	4	PZ
Col-0	+5LD	3	1050	45.8254	4	PZ
Col-0	+5LD	3	1061	77.2865	4	PZ
Col-0	+5LD	3	1141	67.6923	4	PZ
Col-0	+5LD	3	1142	80.5218	4	PZ
Col-0	+5LD	3	1153	66.0838	4	PZ
Col-0	+5LD	3	1157	49.049	4	PZ
Col-0	+5LD	3	1159	74.7065	4	PZ
Col-0	+5LD	3	1176	52.638	4	PZ
Col-0	+5LD	3	3122	50.3807	4	PZ
Col-0	+5LD	3	153	61.5988	5	PZ
Col-0	+5LD	3	214	69.3211	5	PZ
Col-0	+5LD	3	218	44.015	5	PZ
Col-0	+5LD	3	302	41.2172	5	PZ
Col-0	+5LD	3	418	51.1464	5	PZ
Col-0	+5LD	3	420	36.4299	5	PZ
Col-0	+5LD	3	428	65.9757	5	PZ
Col-0	+5LD	3	829	58.4544	5	PZ
Col-0	+5LD	3	851	69.2663	5	PZ
Col-0	+5LD	3	880	54.2184	5	PZ
Col-0	+5LD	3	902	34.7318	5	PZ
Col-0	+5LD	3	919	39.9505	5	PZ
Col-0	+5LD	3	922	53.3229	5	PZ
Col-0	+5LD	3	985	55.5939	5	PZ
Col-0	+5LD	3	1020	44.8857	5	PZ
Col-0	+5LD	3	1030	38.3639	5	PZ
Col-0	+5LD	3	1042	47.4048	5	PZ
Col-0	+5LD	3	1052	76.8128	5	PZ
Col-0	+5LD	3	1060	49.1545	5	PZ
Col-0	+5LD	3	1136	69.2247	5	PZ
Col-0	+5LD	3	1140	81.0567	5	PZ
Col-0	+5LD	3	1143	43.1403	5	PZ
Col-0	+5LD	3	1151	60.0047	5	PZ
Col-0	+5LD	3	1152	53.9105	5	PZ
Col-0	+5LD	3	1154	65.9001	5	PZ
Col-0	+5LD	3	1155	42.7759	5	PZ
Col-0	+5LD	3	1156	34.6997	5	PZ
Col-0	+5LD	3	1175	64.6713	5	PZ
Col-0	+5LD	3	1177	61.9603	5	PZ
Col-0	+5LD	3	16	34.3356	6	NA
Col-0	+5LD	3	70	43.7319	6	NA
Col-0	+5LD	3	73	45.0832	6	NA
Col-0	+5LD	3	154	40.2524	6	NA
Col-0	+5LD	3	247	41.9202	6	NA
Col-0	+5LD	3	276	38.1677	6	NA
Col-0	+5LD	3	346	34.8512	6	NA
Col-0	+5LD	3	357	48.1733	6	NA
Col-0	+5LD	3	371	42.2348	6	NA
Col-0	+5LD	3	380	77.6437	6	NA
Col-0	+5LD	3	409	45.6809	6	NA
Col-0	+5LD	3	582	37.2687	6	NA
Col-0	+5LD	3	774	49.7268	6	NA
Col-0	+5LD	3	795	40.0211	6	NA
Col-0	+5LD	3	827	28.2807	6	NA
Col-0	+5LD	3	850	41.9465	6	NA
Col-0	+5LD	3	854	47.562	6	NA
Col-0	+5LD	3	904	81.6499	6	NA
Col-0	+5LD	3	944	72.6215	6	NA
Col-0	+5LD	3	1003	55.9321	6	NA
Col-0	+5LD	3	1090	47.8768	6	NA
Col-0	+5LD	3	1133	46.338	6	NA
Col-0	+5LD	3	1135	35.0998	6	NA
Col-0	+5LD	3	1139	61.7336	6	NA
Col-0	+5LD	3	1144	61.2504	6	NA
Col-0	+5LD	3	1145	71.846	6	NA
Col-0	+5LD	3	1148	36.3394	6	NA
Col-0	+5LD	3	1149	69.0124	6	NA
Col-0	+5LD	3	1150	62.3333	6	NA
Col-0	+5LD	3	1171	70.6103	6	NA
Col-0	+5LD	3	1178	29.2825	6	NA
Col-0	+5LD	3	1184	96.2773	6	NA
Col-0	+5LD	3	3136	62.9707	6	NA
Col-0	+5LD	3	3140	75.3943	6	NA
Col-0	+5LD	3	98	68.2108	7	NA
Col-0	+5LD	3	106	53.7559	7	NA
Col-0	+5LD	3	181	54.6339	7	NA
Col-0	+5LD	3	188	51.2964	7	NA
Col-0	+5LD	3	202	67.7357	7	NA
Col-0	+5LD	3	206	55.0085	7	NA
Col-0	+5LD	3	209	41.0838	7	NA
Col-0	+5LD	3	231	53.8368	7	NA
Col-0	+5LD	3	277	45.139	7	NA
Col-0	+5LD	3	397	31.1851	7	NA
Col-0	+5LD	3	402	63.0697	7	NA
Col-0	+5LD	3	581	41.7779	7	NA
Col-0	+5LD	3	621	31.4656	7	NA
Col-0	+5LD	3	625	65.749	7	NA
Col-0	+5LD	3	689	53.2587	7	NA
Col-0	+5LD	3	731	41.6005	7	NA
Col-0	+5LD	3	751	46.4492	7	NA
Col-0	+5LD	3	754	51.2828	7	NA
Col-0	+5LD	3	773	31.9053	7	NA
Col-0	+5LD	3	778	81.3072	7	NA
Col-0	+5LD	3	825	35.9398	7	NA
Col-0	+5LD	3	831	78.1477	7	NA
Col-0	+5LD	3	849	62.4087	7	NA
Col-0	+5LD	3	882	44.6401	7	NA
Col-0	+5LD	3	923	67.0689	7	NA
Col-0	+5LD	3	940	66.7427	7	NA
Col-0	+5LD	3	998	69.4577	7	NA
Col-0	+5LD	3	1053	51.7055	7	NA
Col-0	+5LD	3	1062	46.1265	7	NA
Col-0	+5LD	3	1073	33.699	7	NA
Col-0	+5LD	3	1091	31.8731	7	NA
Col-0	+5LD	3	1132	38.7766	7	NA
Col-0	+5LD	3	1134	49.9235	7	NA
Col-0	+5LD	3	1146	58.2476	7	NA
Col-0	+5LD	3	1147	62.3567	7	NA
Col-0	+5LD	3	1172	36.3269	7	NA
Col-0	+5LD	3	1173	83.6808	7	NA
Col-0	+5LD	3	1179	55.8778	7	NA
Col-0	+5LD	3	3078	67.9176	7	NA
Col-0	+5LD	3	3082	57.5801	7	NA
Col-0	+5LD	3	3123	76.7861	7	NA
Col-0	+5LD	3	3133	44.5486	7	NA
Col-0	+5LD	3	3135	24.9148	7	NA
Col-0	+5LD	3	37	30.0123	8	NA
Col-0	+5LD	3	137	37.63	8	NA
Col-0	+5LD	3	143	63.0919	8	NA
Col-0	+5LD	3	150	44.7	8	NA
Col-0	+5LD	3	152	34.7089	8	NA
Col-0	+5LD	3	155	70.8982	8	NA
Col-0	+5LD	3	161	56.7372	8	NA
Col-0	+5LD	3	165	35.7337	8	NA
Col-0	+5LD	3	172	39.092	8	NA
Col-0	+5LD	3	228	59.9217	8	NA
Col-0	+5LD	3	261	63.5079	8	NA
Col-0	+5LD	3	270	53.331	8	NA
Col-0	+5LD	3	320	46.8115	8	NA
Col-0	+5LD	3	334	42.3625	8	NA
Col-0	+5LD	3	386	63.4258	8	NA
Col-0	+5LD	3	396	44.6788	8	NA
Col-0	+5LD	3	421	40.7703	8	NA
Col-0	+5LD	3	628	55.8839	8	NA
Col-0	+5LD	3	681	47.2729	8	NA
Col-0	+5LD	3	687	44.2723	8	NA
Col-0	+5LD	3	710	63.5564	8	NA
Col-0	+5LD	3	727	51.6213	8	NA
Col-0	+5LD	3	730	54.457	8	NA
Col-0	+5LD	3	752	41.7179	8	NA
Col-0	+5LD	3	755	51.7244	8	NA
Col-0	+5LD	3	756	52.4619	8	NA
Col-0	+5LD	3	779	61.9839	8	NA
Col-0	+5LD	3	846	47.9404	8	NA
Col-0	+5LD	3	874	42.51	8	NA
Col-0	+5LD	3	945	31.0049	8	NA
Col-0	+5LD	3	948	46.4706	8	NA
Col-0	+5LD	3	963	45.7987	8	NA
Col-0	+5LD	3	975	29.6344	8	NA
Col-0	+5LD	3	987	66.3119	8	NA
Col-0	+5LD	3	993	79.7294	8	NA
Col-0	+5LD	3	1014	54.4021	8	NA
Col-0	+5LD	3	1059	53.8039	8	NA
Col-0	+5LD	3	1131	26.0358	8	NA
Col-0	+5LD	3	1174	55.9223	8	NA
Col-0	+5LD	3	1182	33.7811	8	NA
Col-0	+5LD	3	3079	32.5555	8	NA
Col-0	+5LD	3	3080	50.8352	8	NA
Col-0	+5LD	3	3084	51.8373	8	NA
Col-0	+5LD	3	3131	58.3157	8	NA
Col-0	+5LD	3	3132	35.9884	8	NA
Col-0	+5LD	3	3134	62.3442	8	NA
Col-0	+5LD	3	3141	45.8469	8	NA
Col-0	+5LD	3	3145	50.2551	8	NA
Col-0	+5LD	3	6	48.4254	9	NA
Col-0	+5LD	3	10	53.056	9	NA
Col-0	+5LD	3	20	42.2519	9	NA
Col-0	+5LD	3	135	33.4469	9	NA
Col-0	+5LD	3	148	30.6818	9	NA
Col-0	+5LD	3	392	57.5516	9	NA
Col-0	+5LD	3	587	53.7038	9	NA
Col-0	+5LD	3	616	29.2703	9	NA
Col-0	+5LD	3	656	61.0352	9	NA
Col-0	+5LD	3	676	27.8808	9	NA
Col-0	+5LD	3	677	40.9127	9	NA
Col-0	+5LD	3	679	29.5443	9	NA
Col-0	+5LD	3	680	29.3909	9	NA
Col-0	+5LD	3	696	38.2463	9	NA
Col-0	+5LD	3	705	34.273	9	NA
Col-0	+5LD	3	711	35.6496	9	NA
Col-0	+5LD	3	712	53.1016	9	NA
Col-0	+5LD	3	750	47.9714	9	NA
Col-0	+5LD	3	757	54.934	9	NA
Col-0	+5LD	3	772	55.6307	9	NA
Col-0	+5LD	3	780	54.1725	9	NA
Col-0	+5LD	3	793	37.4123	9	NA
Col-0	+5LD	3	807	44.5389	9	NA
Col-0	+5LD	3	808	23.8211	9	NA
Col-0	+5LD	3	815	69.8751	9	NA
Col-0	+5LD	3	818	61.8885	9	NA
Col-0	+5LD	3	822	41.074	9	NA
Col-0	+5LD	3	833	40.7306	9	NA
Col-0	+5LD	3	844	62.696	9	NA
Col-0	+5LD	3	871	42.4342	9	NA
Col-0	+5LD	3	883	77.6451	9	NA
Col-0	+5LD	3	913	27.0383	9	NA
Col-0	+5LD	3	924	61.8789	9	NA
Col-0	+5LD	3	1183	27.0708	9	NA
Col-0	+5LD	3	3062	32.355	9	NA
Col-0	+5LD	3	3085	32.234	9	NA
Col-0	+5LD	3	3118	47.3034	9	NA
Col-0	+5LD	3	3129	20.5994	9	NA
Col-0	+5LD	3	3130	48.6386	9	NA
Col-0	+5LD	3	3142	54.6378	9	NA
Col-0	+5LD	3	3146	36.2649	9	NA
Col-0	+5LD	3	3148	64.6876	9	NA
Col-0	+5LD	3	119	31.3461	10	NA
Col-0	+5LD	3	126	41.0437	10	NA
Col-0	+5LD	3	130	33.8716	10	NA
Col-0	+5LD	3	131	45.6228	10	NA
Col-0	+5LD	3	176	43.0792	10	NA
Col-0	+5LD	3	635	31.9158	10	NA
Col-0	+5LD	3	653	53.0537	10	NA
Col-0	+5LD	3	654	33.0867	10	NA
Col-0	+5LD	3	657	73.5285	10	NA
Col-0	+5LD	3	682	44.3194	10	NA
Col-0	+5LD	3	703	39.4548	10	NA
Col-0	+5LD	3	725	36.9475	10	NA
Col-0	+5LD	3	740	52.4348	10	NA
Col-0	+5LD	3	744	36.6806	10	NA
Col-0	+5LD	3	748	21.2862	10	NA
Col-0	+5LD	3	770	61.4785	10	NA
Col-0	+5LD	3	771	60.6029	10	NA
Col-0	+5LD	3	791	36.0331	10	NA
Col-0	+5LD	3	801	45.046	10	NA
Col-0	+5LD	3	804	17.6285	10	NA
Col-0	+5LD	3	824	65.988	10	NA
Col-0	+5LD	3	842	43.4945	10	NA
Col-0	+5LD	3	843	27.8314	10	NA
Col-0	+5LD	3	872	33.6128	10	NA
Col-0	+5LD	3	875	37.6265	10	NA
Col-0	+5LD	3	876	65.4215	10	NA
Col-0	+5LD	3	905	57.8261	10	NA
Col-0	+5LD	3	918	47.9575	10	NA
Col-0	+5LD	3	921	43.8436	10	NA
Col-0	+5LD	3	1058	64.5789	10	NA
Col-0	+5LD	3	1079	69.5144	10	NA
Col-0	+5LD	3	3063	71.7316	10	NA
Col-0	+5LD	3	3070	60.6404	10	NA
Col-0	+5LD	3	3119	33.9313	10	NA
Col-0	+5LD	3	3139	62.5768	10	NA
Col-0	+5LD	3	3144	42.181	10	NA
Col-0	+5LD	3	3147	48.7804	10	NA
Col-0	+5LD	3	8	45.3944	11	NA
Col-0	+5LD	3	82	52.016	11	NA
Col-0	+5LD	3	122	37.941	11	NA
Col-0	+5LD	3	123	79.1648	11	NA
Col-0	+5LD	3	125	50.1507	11	NA
Col-0	+5LD	3	139	39.5226	11	NA
Col-0	+5LD	3	142	48.8167	11	NA
Col-0	+5LD	3	180	42.8117	11	NA
Col-0	+5LD	3	475	60.4474	11	NA
Col-0	+5LD	3	488	64.3832	11	NA
Col-0	+5LD	3	574	38.4466	11	NA
Col-0	+5LD	3	620	47.3078	11	NA
Col-0	+5LD	3	675	42.8132	11	NA
Col-0	+5LD	3	723	71.5974	11	NA
Col-0	+5LD	3	746	45.3744	11	NA
Col-0	+5LD	3	747	47.1582	11	NA
Col-0	+5LD	3	796	35.3654	11	NA
Col-0	+5LD	3	820	39.0483	11	NA
Col-0	+5LD	3	821	56.3893	11	NA
Col-0	+5LD	3	863	34.1837	11	NA
Col-0	+5LD	3	867	36.8592	11	NA
Col-0	+5LD	3	916	39.0319	11	NA
Col-0	+5LD	3	947	50.2998	11	NA
Col-0	+5LD	3	3126	52.3881	11	NA
Col-0	+5LD	3	3143	56.7985	11	NA
Col-0	+5LD	3	63	65.9219	12	NA
Col-0	+5LD	3	115	82.8275	12	NA
Col-0	+5LD	3	116	51.904	12	NA
Col-0	+5LD	3	192	32.7553	12	NA
Col-0	+5LD	3	337	66.5611	12	NA
Col-0	+5LD	3	487	62.3072	12	NA
Col-0	+5LD	3	493	67.274	12	NA
Col-0	+5LD	3	608	60.3935	12	NA
Col-0	+5LD	3	610	29.0345	12	NA
Col-0	+5LD	3	619	47.3066	12	NA
Col-0	+5LD	3	633	47.5956	12	NA
Col-0	+5LD	3	672	73.5942	12	NA
Col-0	+5LD	3	701	42.398	12	NA
Col-0	+5LD	3	702	53.3067	12	NA
Col-0	+5LD	3	736	80.3707	12	NA
Col-0	+5LD	3	861	45.7033	12	NA
Col-0	+5LD	3	914	56.5086	12	NA
Col-0	+5LD	3	982	77.6616	12	NA
Col-0	+5LD	3	3117	35.1419	12	NA
Col-0	+5LD	3	3127	48.9849	12	NA
Col-0	+5LD	3	7	54.3069	13	NA
Col-0	+5LD	3	86	45.4924	13	NA
Col-0	+5LD	3	88	71.9861	13	NA
Col-0	+5LD	3	107	43.237	13	NA
Col-0	+5LD	3	111	49.7899	13	NA
Col-0	+5LD	3	112	63.6354	13	NA
Col-0	+5LD	3	171	52.4094	13	NA
Col-0	+5LD	3	207	51.8807	13	NA
Col-0	+5LD	3	473	58.9396	13	NA
Col-0	+5LD	3	585	61.7796	13	NA
Col-0	+5LD	3	606	58.6949	13	NA
Col-0	+5LD	3	652	48.4067	13	NA
Col-0	+5LD	3	673	45.1035	13	NA
Col-0	+5LD	3	794	58.7657	13	NA
Col-0	+5LD	3	3116	34.817	13	NA
Col-0	+5LD	3	3128	71.3291	13	NA
Col-0	+5LD	3	335	87.26	14	NA
Col-0	+5LD	3	457	66.0058	14	NA
Col-0	+5LD	3	485	38.9894	14	NA
Col-0	+5LD	3	513	30.6961	14	NA
Col-0	+5LD	3	586	73.872	14	NA
Col-0	+5LD	3	908	49.6307	14	NA
Col-0	+5LD	3	979	57.6322	14	NA
Col-0	+5LD	3	59	51.5588	15	NA
Col-0	+5LD	3	309	64.6274	15	NA
Col-0	+5LD	3	492	52.5166	15	NA
Col-0	+5LD	3	502	75.9012	15	NA
Col-0	+5LD	3	576	92.0108	15	NA
Col-0	+5LD	3	997	55.352	15	NA
Col-0	+5LD	4	499	58.1163	0	CZ
Col-0	+5LD	4	492	46.7541	1	CZ
Col-0	+5LD	4	206	49.5321	1	CZ
Col-0	+5LD	4	83	52.3405	1	CZ
Col-0	+5LD	4	826	61.2403	1	CZ
Col-0	+5LD	4	844	70.8446	1	CZ
Col-0	+5LD	4	433	29.1684	2	CZ
Col-0	+5LD	4	58	32.3686	2	CZ
Col-0	+5LD	4	910	37.3966	2	CZ
Col-0	+5LD	4	489	37.5786	2	CZ
Col-0	+5LD	4	429	42.7182	2	CZ
Col-0	+5LD	4	540	43.2733	2	CZ
Col-0	+5LD	4	845	46.4592	2	CZ
Col-0	+5LD	4	431	55.734	2	CZ
Col-0	+5LD	4	825	57.8448	2	CZ
Col-0	+5LD	4	841	66.4661	2	CZ
Col-0	+5LD	4	359	66.9874	2	CZ
Col-0	+5LD	4	911	79.7841	2	CZ
Col-0	+5LD	4	843	33.7165	3	PZ
Col-0	+5LD	4	376	37.164	3	PZ
Col-0	+5LD	4	767	39.1321	3	PZ
Col-0	+5LD	4	812	39.4934	3	PZ
Col-0	+5LD	4	964	39.8153	3	PZ
Col-0	+5LD	4	824	40.2025	3	PZ
Col-0	+5LD	4	965	40.385	3	PZ
Col-0	+5LD	4	364	50.2461	3	PZ
Col-0	+5LD	4	838	57.6509	3	PZ
Col-0	+5LD	4	258	59.4574	3	PZ
Col-0	+5LD	4	379	64.7856	3	PZ
Col-0	+5LD	4	615	65.1446	3	PZ
Col-0	+5LD	4	479	65.615	3	PZ
Col-0	+5LD	4	14	65.9289	3	PZ
Col-0	+5LD	4	176	69.1366	3	PZ
Col-0	+5LD	4	811	71.3201	3	PZ
Col-0	+5LD	4	363	71.4909	3	PZ
Col-0	+5LD	4	402	27.9034	4	PZ
Col-0	+5LD	4	331	32.343	4	PZ
Col-0	+5LD	4	405	42.1157	4	PZ
Col-0	+5LD	4	963	48.1046	4	PZ
Col-0	+5LD	4	746	48.3221	4	PZ
Col-0	+5LD	4	745	50.3924	4	PZ
Col-0	+5LD	4	319	50.5926	4	PZ
Col-0	+5LD	4	982	51.0858	4	PZ
Col-0	+5LD	4	852	52.5907	4	PZ
Col-0	+5LD	4	846	54.4718	4	PZ
Col-0	+5LD	4	941	59.2504	4	PZ
Col-0	+5LD	4	406	59.8505	4	PZ
Col-0	+5LD	4	983	60.4629	4	PZ
Col-0	+5LD	4	181	63.769	4	PZ
Col-0	+5LD	4	93	66.0906	4	PZ
Col-0	+5LD	4	847	66.8446	4	PZ
Col-0	+5LD	4	382	69.9664	4	PZ
Col-0	+5LD	4	474	70.3732	4	PZ
Col-0	+5LD	4	725	75.1128	4	PZ
Col-0	+5LD	4	810	75.9936	4	PZ
Col-0	+5LD	4	851	76.6182	4	PZ
Col-0	+5LD	4	340	30.8793	5	PZ
Col-0	+5LD	4	477	31.7954	5	PZ
Col-0	+5LD	4	624	33.5506	5	PZ
Col-0	+5LD	4	190	34.4682	5	PZ
Col-0	+5LD	4	375	42.1594	5	PZ
Col-0	+5LD	4	51	42.8186	5	PZ
Col-0	+5LD	4	472	43.3615	5	PZ
Col-0	+5LD	4	352	44.6538	5	PZ
Col-0	+5LD	4	903	44.7256	5	PZ
Col-0	+5LD	4	905	45.577	5	PZ
Col-0	+5LD	4	353	46.141	5	PZ
Col-0	+5LD	4	42	48.1642	5	PZ
Col-0	+5LD	4	914	48.4173	5	PZ
Col-0	+5LD	4	850	48.9893	5	PZ
Col-0	+5LD	4	408	49.0239	5	PZ
Col-0	+5LD	4	804	51.2001	5	PZ
Col-0	+5LD	4	574	51.412	5	PZ
Col-0	+5LD	4	339	53.1662	5	PZ
Col-0	+5LD	4	904	56.1725	5	PZ
Col-0	+5LD	4	131	59.0063	5	PZ
Col-0	+5LD	4	707	59.123	5	PZ
Col-0	+5LD	4	912	60.1308	5	PZ
Col-0	+5LD	4	662	61.5382	5	PZ
Col-0	+5LD	4	940	66.1857	5	PZ
Col-0	+5LD	4	715	67.013	5	PZ
Col-0	+5LD	4	476	71.494	5	PZ
Col-0	+5LD	4	962	73.5658	5	PZ
Col-0	+5LD	4	687	75.6802	5	PZ
Col-0	+5LD	4	688	82.8751	5	PZ
Col-0	+5LD	4	902	22.7591	6	NA
Col-0	+5LD	4	15	31.455	6	NA
Col-0	+5LD	4	913	38.3617	6	NA
Col-0	+5LD	4	294	38.695	6	NA
Col-0	+5LD	4	670	38.8825	6	NA
Col-0	+5LD	4	598	39.8859	6	NA
Col-0	+5LD	4	848	41.572	6	NA
Col-0	+5LD	4	367	41.6625	6	NA
Col-0	+5LD	4	669	42.1889	6	NA
Col-0	+5LD	4	470	42.637	6	NA
Col-0	+5LD	4	39	42.6921	6	NA
Col-0	+5LD	4	273	43.0902	6	NA
Col-0	+5LD	4	138	43.1759	6	NA
Col-0	+5LD	4	109	43.7037	6	NA
Col-0	+5LD	4	24	44.4069	6	NA
Col-0	+5LD	4	856	44.4986	6	NA
Col-0	+5LD	4	318	46.5828	6	NA
Col-0	+5LD	4	671	49.5767	6	NA
Col-0	+5LD	4	630	49.7981	6	NA
Col-0	+5LD	4	544	50.6163	6	NA
Col-0	+5LD	4	654	51.8786	6	NA
Col-0	+5LD	4	432	53.0381	6	NA
Col-0	+5LD	4	753	54.3446	6	NA
Col-0	+5LD	4	915	55.8246	6	NA
Col-0	+5LD	4	627	56.4926	6	NA
Col-0	+5LD	4	772	57.8855	6	NA
Col-0	+5LD	4	438	58.1558	6	NA
Col-0	+5LD	4	329	59.3626	6	NA
Col-0	+5LD	4	32	61.1475	6	NA
Col-0	+5LD	4	407	62.3579	6	NA
Col-0	+5LD	4	710	63.4452	6	NA
Col-0	+5LD	4	437	66.8618	6	NA
Col-0	+5LD	4	301	67.3326	6	NA
Col-0	+5LD	4	158	72.3632	6	NA
Col-0	+5LD	4	853	77.2446	6	NA
Col-0	+5LD	4	236	82.7833	6	NA
Col-0	+5LD	4	886	23.2113	7	NA
Col-0	+5LD	4	299	26.736	7	NA
Col-0	+5LD	4	829	27.4462	7	NA
Col-0	+5LD	4	653	30.6954	7	NA
Col-0	+5LD	4	207	31.1439	7	NA
Col-0	+5LD	4	164	33.594	7	NA
Col-0	+5LD	4	409	33.6057	7	NA
Col-0	+5LD	4	966	33.8512	7	NA
Col-0	+5LD	4	279	34.0509	7	NA
Col-0	+5LD	4	272	35.9863	7	NA
Col-0	+5LD	4	143	38.1321	7	NA
Col-0	+5LD	4	221	38.884	7	NA
Col-0	+5LD	4	289	41.4053	7	NA
Col-0	+5LD	4	274	42.6451	7	NA
Col-0	+5LD	4	296	43.5576	7	NA
Col-0	+5LD	4	649	43.7149	7	NA
Col-0	+5LD	4	105	43.7543	7	NA
Col-0	+5LD	4	578	44.1468	7	NA
Col-0	+5LD	4	785	44.4351	7	NA
Col-0	+5LD	4	855	45.3893	7	NA
Col-0	+5LD	4	916	46.7044	7	NA
Col-0	+5LD	4	577	46.7177	7	NA
Col-0	+5LD	4	522	47.4424	7	NA
Col-0	+5LD	4	744	47.6996	7	NA
Col-0	+5LD	4	849	50.0655	7	NA
Col-0	+5LD	4	651	50.3165	7	NA
Col-0	+5LD	4	685	51.2564	7	NA
Col-0	+5LD	4	82	52.568	7	NA
Col-0	+5LD	4	541	52.7649	7	NA
Col-0	+5LD	4	547	53.1738	7	NA
Col-0	+5LD	4	906	54.1399	7	NA
Col-0	+5LD	4	182	54.9596	7	NA
Col-0	+5LD	4	640	55.2913	7	NA
Col-0	+5LD	4	288	55.6326	7	NA
Col-0	+5LD	4	29	55.7849	7	NA
Col-0	+5LD	4	374	57.0095	7	NA
Col-0	+5LD	4	281	59.4392	7	NA
Col-0	+5LD	4	833	62.7315	7	NA
Col-0	+5LD	4	509	64.2636	7	NA
Col-0	+5LD	4	724	65.3936	7	NA
Col-0	+5LD	4	854	70.952	7	NA
Col-0	+5LD	4	797	72.8314	7	NA
Col-0	+5LD	4	691	73.2577	7	NA
Col-0	+5LD	4	146	75.8452	7	NA
Col-0	+5LD	4	97	83.2797	7	NA
Col-0	+5LD	4	40	29.299	8	NA
Col-0	+5LD	4	652	31.5529	8	NA
Col-0	+5LD	4	968	32.54	8	NA
Col-0	+5LD	4	967	33.2835	8	NA
Col-0	+5LD	4	921	34.9588	8	NA
Col-0	+5LD	4	103	36.7401	8	NA
Col-0	+5LD	4	601	38.0515	8	NA
Col-0	+5LD	4	743	38.0858	8	NA
Col-0	+5LD	4	631	39.7598	8	NA
Col-0	+5LD	4	580	39.9475	8	NA
Col-0	+5LD	4	351	40.4606	8	NA
Col-0	+5LD	4	478	40.9129	8	NA
Col-0	+5LD	4	110	40.9941	8	NA
Col-0	+5LD	4	814	41.3277	8	NA
Col-0	+5LD	4	678	41.6338	8	NA
Col-0	+5LD	4	251	41.6506	8	NA
Col-0	+5LD	4	885	42.1806	8	NA
Col-0	+5LD	4	282	43.0613	8	NA
Col-0	+5LD	4	264	44.6117	8	NA
Col-0	+5LD	4	3	44.6523	8	NA
Col-0	+5LD	4	343	45.2808	8	NA
Col-0	+5LD	4	153	45.5646	8	NA
Col-0	+5LD	4	907	46.3166	8	NA
Col-0	+5LD	4	514	47.305	8	NA
Col-0	+5LD	4	7	47.711	8	NA
Col-0	+5LD	4	254	48.8217	8	NA
Col-0	+5LD	4	323	51.5104	8	NA
Col-0	+5LD	4	166	51.6851	8	NA
Col-0	+5LD	4	76	52.3608	8	NA
Col-0	+5LD	4	548	52.5134	8	NA
Col-0	+5LD	4	87	55.3397	8	NA
Col-0	+5LD	4	589	55.5759	8	NA
Col-0	+5LD	4	186	56.6564	8	NA
Col-0	+5LD	4	679	56.7224	8	NA
Col-0	+5LD	4	693	58.7317	8	NA
Col-0	+5LD	4	726	60.314	8	NA
Col-0	+5LD	4	30	60.9168	8	NA
Col-0	+5LD	4	761	61.4688	8	NA
Col-0	+5LD	4	80	61.8062	8	NA
Col-0	+5LD	4	119	63.1784	8	NA
Col-0	+5LD	4	326	63.2475	8	NA
Col-0	+5LD	4	696	67.4902	8	NA
Col-0	+5LD	4	385	68.0154	8	NA
Col-0	+5LD	4	170	68.0231	8	NA
Col-0	+5LD	4	215	68.3059	8	NA
Col-0	+5LD	4	569	68.817	8	NA
Col-0	+5LD	4	165	69.0974	8	NA
Col-0	+5LD	4	167	70.2201	8	NA
Col-0	+5LD	4	275	73.5573	8	NA
Col-0	+5LD	4	422	76.3663	8	NA
Col-0	+5LD	4	901	18.679	9	NA
Col-0	+5LD	4	917	26.1287	9	NA
Col-0	+5LD	4	887	28.4868	9	NA
Col-0	+5LD	4	655	28.954	9	NA
Col-0	+5LD	4	588	29.5959	9	NA
Col-0	+5LD	4	672	30.3705	9	NA
Col-0	+5LD	4	894	34.8164	9	NA
Col-0	+5LD	4	809	35.0559	9	NA
Col-0	+5LD	4	647	35.2409	9	NA
Col-0	+5LD	4	675	35.8319	9	NA
Col-0	+5LD	4	755	36.9526	9	NA
Col-0	+5LD	4	898	37.1282	9	NA
Col-0	+5LD	4	64	37.2009	9	NA
Col-0	+5LD	4	237	37.7704	9	NA
Col-0	+5LD	4	410	37.8959	9	NA
Col-0	+5LD	4	783	38.0849	9	NA
Col-0	+5LD	4	979	38.7022	9	NA
Col-0	+5LD	4	278	39.1332	9	NA
Col-0	+5LD	4	975	39.7493	9	NA
Col-0	+5LD	4	908	40.5867	9	NA
Col-0	+5LD	4	70	40.7794	9	NA
Col-0	+5LD	4	922	41.1954	9	NA
Col-0	+5LD	4	441	42.2207	9	NA
Col-0	+5LD	4	900	42.2979	9	NA
Col-0	+5LD	4	576	42.5959	9	NA
Col-0	+5LD	4	712	44.5645	9	NA
Col-0	+5LD	4	195	44.694	9	NA
Col-0	+5LD	4	287	45.2527	9	NA
Col-0	+5LD	4	68	47.322	9	NA
Col-0	+5LD	4	1000	48.4058	9	NA
Col-0	+5LD	4	599	48.495	9	NA
Col-0	+5LD	4	333	48.7038	9	NA
Col-0	+5LD	4	255	49.5535	9	NA
Col-0	+5LD	4	140	49.9885	9	NA
Col-0	+5LD	4	22	51.8833	9	NA
Col-0	+5LD	4	871	53.2363	9	NA
Col-0	+5LD	4	643	53.2831	9	NA
Col-0	+5LD	4	463	54.2431	9	NA
Col-0	+5LD	4	160	55.7439	9	NA
Col-0	+5LD	4	736	57.6925	9	NA
Col-0	+5LD	4	680	58.1119	9	NA
Col-0	+5LD	4	734	58.7024	9	NA
Col-0	+5LD	4	713	58.7202	9	NA
Col-0	+5LD	4	642	58.987	9	NA
Col-0	+5LD	4	719	59.1329	9	NA
Col-0	+5LD	4	108	59.9006	9	NA
Col-0	+5LD	4	973	60.585	9	NA
Col-0	+5LD	4	956	63.489	9	NA
Col-0	+5LD	4	348	63.9059	9	NA
Col-0	+5LD	4	511	65.5647	9	NA
Col-0	+5LD	4	307	72.0982	9	NA
Col-0	+5LD	4	290	72.7851	9	NA
Col-0	+5LD	4	44	76.4866	9	NA
Col-0	+5LD	4	159	23.5334	10	NA
Col-0	+5LD	4	899	23.9822	10	NA
Col-0	+5LD	4	978	26.849	10	NA
Col-0	+5LD	4	564	28.1475	10	NA
Col-0	+5LD	4	897	29.1545	10	NA
Col-0	+5LD	4	888	30.9508	10	NA
Col-0	+5LD	4	286	31.5095	10	NA
Col-0	+5LD	4	972	32.7697	10	NA
Col-0	+5LD	4	974	32.9874	10	NA
Col-0	+5LD	4	154	33.9975	10	NA
Col-0	+5LD	4	632	34.2546	10	NA
Col-0	+5LD	4	961	36.2059	10	NA
Col-0	+5LD	4	876	37.2827	10	NA
Col-0	+5LD	4	232	37.3961	10	NA
Col-0	+5LD	4	448	38.0708	10	NA
Col-0	+5LD	4	985	38.1444	10	NA
Col-0	+5LD	4	622	38.2191	10	NA
Col-0	+5LD	4	957	38.9376	10	NA
Col-0	+5LD	4	443	39.4768	10	NA
Col-0	+5LD	4	735	40.5055	10	NA
Col-0	+5LD	4	456	40.7417	10	NA
Col-0	+5LD	4	447	42.0997	10	NA
Col-0	+5LD	4	782	42.2246	10	NA
Col-0	+5LD	4	621	42.4118	10	NA
Col-0	+5LD	4	984	44.2838	10	NA
Col-0	+5LD	4	276	47.7024	10	NA
Col-0	+5LD	4	226	48.2006	10	NA
Col-0	+5LD	4	101	48.8627	10	NA
Col-0	+5LD	4	870	48.928	10	NA
Col-0	+5LD	4	17	48.9558	10	NA
Col-0	+5LD	4	220	50.3215	10	NA
Col-0	+5LD	4	66	50.7705	10	NA
Col-0	+5LD	4	924	55.9459	10	NA
Col-0	+5LD	4	741	56.9709	10	NA
Col-0	+5LD	4	185	56.9783	10	NA
Col-0	+5LD	4	893	57.1268	10	NA
Col-0	+5LD	4	462	57.6462	10	NA
Col-0	+5LD	4	909	59.9393	10	NA
Col-0	+5LD	4	752	63.2893	10	NA
Col-0	+5LD	4	857	65.9646	10	NA
Col-0	+5LD	4	324	79.1444	10	NA
Col-0	+5LD	4	877	19.9744	11	NA
Col-0	+5LD	4	958	24.2833	11	NA
Col-0	+5LD	4	142	26.627	11	NA
Col-0	+5LD	4	639	28.643	11	NA
Col-0	+5LD	4	960	31.6911	11	NA
Col-0	+5LD	4	559	32.2987	11	NA
Col-0	+5LD	4	597	35.961	11	NA
Col-0	+5LD	4	536	41.6441	11	NA
Col-0	+5LD	4	881	41.6517	11	NA
Col-0	+5LD	4	896	42.6127	11	NA
Col-0	+5LD	4	565	43.1231	11	NA
Col-0	+5LD	4	879	43.5062	11	NA
Col-0	+5LD	4	927	47.3926	11	NA
Col-0	+5LD	4	495	48.1912	11	NA
Col-0	+5LD	4	1016	49.3127	11	NA
Col-0	+5LD	4	211	49.617	11	NA
Col-0	+5LD	4	667	51.4415	11	NA
Col-0	+5LD	4	583	52.8423	11	NA
Col-0	+5LD	4	926	53.3944	11	NA
Col-0	+5LD	4	858	56.901	11	NA
Col-0	+5LD	4	81	58.3671	11	NA
Col-0	+5LD	4	923	58.3877	11	NA
Col-0	+5LD	4	932	60.0717	11	NA
Col-0	+5LD	4	325	61.6568	11	NA
Col-0	+5LD	4	524	62.8242	11	NA
Col-0	+5LD	4	550	64.3346	11	NA
Col-0	+5LD	4	760	75.7486	11	NA
Col-0	+5LD	4	413	76.2226	11	NA
Col-0	+5LD	4	882	30.2915	12	NA
Col-0	+5LD	4	895	31.0491	12	NA
Col-0	+5LD	4	34	33.4218	12	NA
Col-0	+5LD	4	930	37.8508	12	NA
Col-0	+5LD	4	889	38.0453	12	NA
Col-0	+5LD	4	1015	38.8062	12	NA
Col-0	+5LD	4	880	39.4405	12	NA
Col-0	+5LD	4	10	41.4364	12	NA
Col-0	+5LD	4	976	44.7598	12	NA
Col-0	+5LD	4	71	46.3879	12	NA
Col-0	+5LD	4	134	52.6177	12	NA
Col-0	+5LD	4	925	55.3969	12	NA
Col-0	+5LD	4	1018	60.3225	12	NA
Col-0	+5LD	4	502	60.6753	12	NA
Col-0	+5LD	4	466	61.329	12	NA
Col-0	+5LD	4	587	61.8981	12	NA
Col-0	+5LD	4	503	84.2008	12	NA
Col-0	+5LD	4	931	32.2817	13	NA
Col-0	+5LD	4	73	40.9618	13	NA
Col-0	+5LD	4	977	41.7889	13	NA
Col-0	+5LD	4	557	52.2812	13	NA
Col-0	+5LD	4	18	55.0363	13	NA
Col-0	+5LD	4	263	57.2891	13	NA
Col-0	+5LD	4	890	64.2945	13	NA
Col-0	+5LD	4	558	69.6425	13	NA
Col-0	+5LD	4	520	69.8778	13	NA
Col-0	+5LD	4	446	76.6725	13	NA
Col-0	+5LD	4	777	86.3062	13	NA
Col-0	+5LD	4	465	64.9768	14	NA
Col-0	+5LD	4	571	68.0497	14	NA
Col-0	+5LD	4	219	79.4005	14	NA
Col-0	+5LD	4	210	68.6812	15	NA
Col-0	+5LD	5	235	50.8111	0	CZ
Col-0	+5LD	5	170	45.0583	1	CZ
Col-0	+5LD	5	178	43.2239	1	CZ
Col-0	+5LD	5	473	54.6131	1	CZ
Col-0	+5LD	5	749	43.6994	1	CZ
Col-0	+5LD	5	773	59.519	1	CZ
Col-0	+5LD	5	774	77.3385	1	CZ
Col-0	+5LD	5	93	54.8346	2	CZ
Col-0	+5LD	5	108	35.7175	2	CZ
Col-0	+5LD	5	228	51.6329	2	CZ
Col-0	+5LD	5	303	37.9915	2	CZ
Col-0	+5LD	5	331	33.365	2	CZ
Col-0	+5LD	5	413	34.5473	2	CZ
Col-0	+5LD	5	423	33.7133	2	CZ
Col-0	+5LD	5	472	40.1581	2	CZ
Col-0	+5LD	5	504	40.0785	2	CZ
Col-0	+5LD	5	512	40.9321	2	CZ
Col-0	+5LD	5	662	51.2927	2	CZ
Col-0	+5LD	5	668	43.5466	2	CZ
Col-0	+5LD	5	720	37.2407	2	CZ
Col-0	+5LD	5	726	48.2848	2	CZ
Col-0	+5LD	5	79	60.4062	3	PZ
Col-0	+5LD	5	112	31.8747	3	PZ
Col-0	+5LD	5	166	42.2223	3	PZ
Col-0	+5LD	5	188	54.9184	3	PZ
Col-0	+5LD	5	189	45.2185	3	PZ
Col-0	+5LD	5	384	49.34	3	PZ
Col-0	+5LD	5	437	52.9995	3	PZ
Col-0	+5LD	5	697	42.577	3	PZ
Col-0	+5LD	5	703	68.8224	3	PZ
Col-0	+5LD	5	711	79.3099	3	PZ
Col-0	+5LD	5	752	38.9652	3	PZ
Col-0	+5LD	5	753	52.4241	3	PZ
Col-0	+5LD	5	754	62.5151	3	PZ
Col-0	+5LD	5	755	65.2823	3	PZ
Col-0	+5LD	5	775	57.4818	3	PZ
Col-0	+5LD	5	777	43.7503	3	PZ
Col-0	+5LD	5	779	48.3562	3	PZ
Col-0	+5LD	5	56	52.906	4	PZ
Col-0	+5LD	5	78	56.2387	4	PZ
Col-0	+5LD	5	156	49.6649	4	PZ
Col-0	+5LD	5	192	50.9723	4	PZ
Col-0	+5LD	5	233	49.3612	4	PZ
Col-0	+5LD	5	251	63.9946	4	PZ
Col-0	+5LD	5	286	45.2759	4	PZ
Col-0	+5LD	5	391	54.9152	4	PZ
Col-0	+5LD	5	395	54.3678	4	PZ
Col-0	+5LD	5	569	49.0408	4	PZ
Col-0	+5LD	5	586	56.9775	4	PZ
Col-0	+5LD	5	679	58.8128	4	PZ
Col-0	+5LD	5	721	75.7157	4	PZ
Col-0	+5LD	5	747	46.8674	4	PZ
Col-0	+5LD	5	756	63.2825	4	PZ
Col-0	+5LD	5	758	56.0305	4	PZ
Col-0	+5LD	5	762	32.7381	4	PZ
Col-0	+5LD	5	763	50.86	4	PZ
Col-0	+5LD	5	776	55.9301	4	PZ
Col-0	+5LD	5	780	31.4953	4	PZ
Col-0	+5LD	5	793	42.2118	4	PZ
Col-0	+5LD	5	794	34.3951	4	PZ
Col-0	+5LD	5	812	76.7258	4	PZ
Col-0	+5LD	5	813	30.7374	4	PZ
Col-0	+5LD	5	37	72.0444	5	PZ
Col-0	+5LD	5	45	69.1211	5	PZ
Col-0	+5LD	5	134	53.8977	5	PZ
Col-0	+5LD	5	163	68.09	5	PZ
Col-0	+5LD	5	167	59.5296	5	PZ
Col-0	+5LD	5	267	43.7333	5	PZ
Col-0	+5LD	5	277	71.5735	5	PZ
Col-0	+5LD	5	290	54.6914	5	PZ
Col-0	+5LD	5	386	76.2054	5	PZ
Col-0	+5LD	5	396	41.0668	5	PZ
Col-0	+5LD	5	414	31.0179	5	PZ
Col-0	+5LD	5	490	49.9892	5	PZ
Col-0	+5LD	5	558	49.4649	5	PZ
Col-0	+5LD	5	603	28.8998	5	PZ
Col-0	+5LD	5	634	63.1265	5	PZ
Col-0	+5LD	5	655	45.6748	5	PZ
Col-0	+5LD	5	658	49.5405	5	PZ
Col-0	+5LD	5	666	63.1572	5	PZ
Col-0	+5LD	5	690	76.444	5	PZ
Col-0	+5LD	5	757	53.474	5	PZ
Col-0	+5LD	5	759	78.5637	5	PZ
Col-0	+5LD	5	764	67.4627	5	PZ
Col-0	+5LD	5	765	82.8754	5	PZ
Col-0	+5LD	5	791	64.4282	5	PZ
Col-0	+5LD	5	792	66.4938	5	PZ
Col-0	+5LD	5	796	37.9323	5	PZ
Col-0	+5LD	5	799	48.6747	5	PZ
Col-0	+5LD	5	41	39.9917	6	NA
Col-0	+5LD	5	137	58.1123	6	NA
Col-0	+5LD	5	146	62.9947	6	NA
Col-0	+5LD	5	151	42.3247	6	NA
Col-0	+5LD	5	152	49.7486	6	NA
Col-0	+5LD	5	191	34.215	6	NA
Col-0	+5LD	5	268	35.9495	6	NA
Col-0	+5LD	5	307	44.4666	6	NA
Col-0	+5LD	5	309	48.3492	6	NA
Col-0	+5LD	5	376	64.9014	6	NA
Col-0	+5LD	5	390	40.2907	6	NA
Col-0	+5LD	5	424	55.5635	6	NA
Col-0	+5LD	5	471	69	6	NA
Col-0	+5LD	5	540	59.5629	6	NA
Col-0	+5LD	5	615	68.4452	6	NA
Col-0	+5LD	5	628	34.0536	6	NA
Col-0	+5LD	5	633	56.9375	6	NA
Col-0	+5LD	5	636	67.1958	6	NA
Col-0	+5LD	5	649	33.2381	6	NA
Col-0	+5LD	5	660	57.6099	6	NA
Col-0	+5LD	5	678	65.1736	6	NA
Col-0	+5LD	5	684	50.8908	6	NA
Col-0	+5LD	5	687	53.0794	6	NA
Col-0	+5LD	5	692	60.2544	6	NA
Col-0	+5LD	5	698	46.1498	6	NA
Col-0	+5LD	5	717	61.3949	6	NA
Col-0	+5LD	5	760	46.2312	6	NA
Col-0	+5LD	5	766	36.7236	6	NA
Col-0	+5LD	5	767	36.4121	6	NA
Col-0	+5LD	5	785	31.6951	6	NA
Col-0	+5LD	5	786	38.1111	6	NA
Col-0	+5LD	5	787	42.4186	6	NA
Col-0	+5LD	5	797	37.7797	6	NA
Col-0	+5LD	5	798	49.247	6	NA
Col-0	+5LD	5	802	28.9417	6	NA
Col-0	+5LD	5	9	49.8569	7	NA
Col-0	+5LD	5	12	50.2441	7	NA
Col-0	+5LD	5	58	45.1969	7	NA
Col-0	+5LD	5	97	48.1898	7	NA
Col-0	+5LD	5	135	65.65	7	NA
Col-0	+5LD	5	138	27.5763	7	NA
Col-0	+5LD	5	148	49.8205	7	NA
Col-0	+5LD	5	162	55.0791	7	NA
Col-0	+5LD	5	164	54.7301	7	NA
Col-0	+5LD	5	172	74.6599	7	NA
Col-0	+5LD	5	173	47.2103	7	NA
Col-0	+5LD	5	175	66.7812	7	NA
Col-0	+5LD	5	206	74.7504	7	NA
Col-0	+5LD	5	265	31.4685	7	NA
Col-0	+5LD	5	266	50.4469	7	NA
Col-0	+5LD	5	335	51.2117	7	NA
Col-0	+5LD	5	372	44.946	7	NA
Col-0	+5LD	5	382	32.978	7	NA
Col-0	+5LD	5	412	33.4916	7	NA
Col-0	+5LD	5	449	69.4413	7	NA
Col-0	+5LD	5	580	32.9812	7	NA
Col-0	+5LD	5	590	48.8133	7	NA
Col-0	+5LD	5	614	44.6954	7	NA
Col-0	+5LD	5	637	42.4114	7	NA
Col-0	+5LD	5	638	41.5576	7	NA
Col-0	+5LD	5	665	45.0392	7	NA
Col-0	+5LD	5	680	37.4345	7	NA
Col-0	+5LD	5	681	70.6578	7	NA
Col-0	+5LD	5	688	45.9077	7	NA
Col-0	+5LD	5	696	58.4075	7	NA
Col-0	+5LD	5	761	39.376	7	NA
Col-0	+5LD	5	768	44.6444	7	NA
Col-0	+5LD	5	782	52.3698	7	NA
Col-0	+5LD	5	788	31.4572	7	NA
Col-0	+5LD	5	803	49.9718	7	NA
Col-0	+5LD	5	810	49.5718	7	NA
Col-0	+5LD	5	898	54.0759	7	NA
Col-0	+5LD	5	44	60.5052	8	NA
Col-0	+5LD	5	72	44.4871	8	NA
Col-0	+5LD	5	91	53.8437	8	NA
Col-0	+5LD	5	98	35.4791	8	NA
Col-0	+5LD	5	190	57.7676	8	NA
Col-0	+5LD	5	193	29.5751	8	NA
Col-0	+5LD	5	195	50.7506	8	NA
Col-0	+5LD	5	196	53.2756	8	NA
Col-0	+5LD	5	199	31.3011	8	NA
Col-0	+5LD	5	216	55.6611	8	NA
Col-0	+5LD	5	227	44.0222	8	NA
Col-0	+5LD	5	255	59.5261	8	NA
Col-0	+5LD	5	258	52.8289	8	NA
Col-0	+5LD	5	270	53.3656	8	NA
Col-0	+5LD	5	284	61.8572	8	NA
Col-0	+5LD	5	292	45.6781	8	NA
Col-0	+5LD	5	293	38.8387	8	NA
Col-0	+5LD	5	324	43.3686	8	NA
Col-0	+5LD	5	325	55.2425	8	NA
Col-0	+5LD	5	362	35.9354	8	NA
Col-0	+5LD	5	405	51.259	8	NA
Col-0	+5LD	5	421	37.2116	8	NA
Col-0	+5LD	5	536	46.5518	8	NA
Col-0	+5LD	5	565	44.4627	8	NA
Col-0	+5LD	5	582	44.3993	8	NA
Col-0	+5LD	5	600	58.1335	8	NA
Col-0	+5LD	5	602	68.7593	8	NA
Col-0	+5LD	5	608	51.7055	8	NA
Col-0	+5LD	5	617	39.7526	8	NA
Col-0	+5LD	5	647	46.5724	8	NA
Col-0	+5LD	5	650	56.6917	8	NA
Col-0	+5LD	5	672	66.7	8	NA
Col-0	+5LD	5	707	46.2569	8	NA
Col-0	+5LD	5	730	58.2045	8	NA
Col-0	+5LD	5	769	37.7455	8	NA
Col-0	+5LD	5	789	51.3466	8	NA
Col-0	+5LD	5	804	42.0934	8	NA
Col-0	+5LD	5	805	41.3214	8	NA
Col-0	+5LD	5	808	32.7893	8	NA
Col-0	+5LD	5	809	52.2283	8	NA
Col-0	+5LD	5	899	44.2783	8	NA
Col-0	+5LD	5	23	47.648	9	NA
Col-0	+5LD	5	65	34.93	9	NA
Col-0	+5LD	5	69	49.8339	9	NA
Col-0	+5LD	5	75	63.6384	9	NA
Col-0	+5LD	5	88	42.954	9	NA
Col-0	+5LD	5	90	48.1966	9	NA
Col-0	+5LD	5	106	36.0585	9	NA
Col-0	+5LD	5	126	87.6479	9	NA
Col-0	+5LD	5	143	27.0172	9	NA
Col-0	+5LD	5	155	40.889	9	NA
Col-0	+5LD	5	176	37.8281	9	NA
Col-0	+5LD	5	207	44.6934	9	NA
Col-0	+5LD	5	232	47.6951	9	NA
Col-0	+5LD	5	250	78.1582	9	NA
Col-0	+5LD	5	262	66.4967	9	NA
Col-0	+5LD	5	276	63.6032	9	NA
Col-0	+5LD	5	285	30.5963	9	NA
Col-0	+5LD	5	294	40.115	9	NA
Col-0	+5LD	5	302	28.9591	9	NA
Col-0	+5LD	5	306	44.4426	9	NA
Col-0	+5LD	5	381	47.0111	9	NA
Col-0	+5LD	5	397	57.2703	9	NA
Col-0	+5LD	5	433	31.8568	9	NA
Col-0	+5LD	5	447	56.0008	9	NA
Col-0	+5LD	5	470	35.2112	9	NA
Col-0	+5LD	5	497	32.8819	9	NA
Col-0	+5LD	5	587	30.1109	9	NA
Col-0	+5LD	5	589	28.3039	9	NA
Col-0	+5LD	5	591	65.7253	9	NA
Col-0	+5LD	5	592	64.9074	9	NA
Col-0	+5LD	5	609	61.0974	9	NA
Col-0	+5LD	5	610	34.7845	9	NA
Col-0	+5LD	5	613	64.9547	9	NA
Col-0	+5LD	5	618	42.8418	9	NA
Col-0	+5LD	5	705	49.2878	9	NA
Col-0	+5LD	5	727	45.6905	9	NA
[truncated: 11,364 more rows]
