# Supplementary material for: Regulation of shoot meristem shape by photoperiodic signaling and phytohormones during floral induction of Arabidopsis
Source: eLife journal article supplement (doi:10.7554/elife.60661), 2020-12-14
Supplement: supp [file elife-60661-supp-v1.zip › elife_poa_e60661_Figure_6_source_data_1.xlsx]

## Sheet: (ga20ox2)
Figure 6-source data1: Original RT-qPCR data of different genotypes for Figure 6A-B
	Ct(ga20ox2)	Ct(pex4)	Average (ga20ox2)	Average (pex4)	Dct	Log2DDCT	DDct	Average (Dct)	Log2 Biological replicat	Standard Deviation
RI Col0 9LD	28.76	23.95	28.82	24.1933	0.0404794	0.426512	1.34398	0.0301191	-0.073488	0.580527		Log2 (GA20ox2)					Standard Deviation
	28.91	24.37											Col0	soc1-2	svp-41			Col0	soc1-2	svp-41
	28.79	24.26										9LD	-0.073488	0.590956	2.72873		9LD	0.580527	0.690968	0.105848
RII Col0 9LD	29.67	25.14	30.0433	25.0533	0.0314674	0.0631786	1.04477					11LD	0.459845	0.815401	2.74318		11LD	0.636274	0.867956	0.869527
	30.4	25.01										13LD	0.228734	0.467623	1.07429		13LD	0.51418	0.16988	0.708059
	30.06	25.01										15LD	0.0854009	0.930956	-0.331266		15LD	0.316655	0.92005	0.335929
RIII Col0 9LD	29.64	23.96	29.96	24.1967	0.0184104	-0.710155	0.611255					17LD	-0.533488	1.37096	0.154845		17LD	0.270637	0.133097	0.363712
	30.09	24.27										19LD	0.026512	1.06818	0.698734		19LD	0.211266	0.426621	0.422129
	30.15	24.36
RI soc1 9LD	27.14	23.32	27.1833	23.51	0.078382	1.37985	2.6024	0.0491958	0.590956	0.690968
	27.37	NA
	27.04	23.7
RII soc1 9LD	28.22	23.43	28.1033	23.1433	0.0321286	0.0931786	1.06672
	28.02	22.94
	28.07	23.06
RIII soc1 9LD	28.09	23.3	28.1767	23.4233	0.037077	0.299845	1.23101
	28.35	23.4
	28.09	23.57
RI svp 9LD	25.5	23.69	25.85	23.5867	0.20829	2.78985	6.91556	0.200005	2.72873	0.105848
	26.13	23.32
	25.92	23.75
RII svp 9LD	26.38	24.03	26.5333	24.0867	0.183434	2.60651	6.09029
	26.57	24.15
	26.65	24.08
RIII svp 9LD	26.5	24.24	26.43	24.1667	0.20829	2.78985	6.91556
	26.44	24.05
	26.35	24.21
RI Col0 11LD	28.96	23.65	28.7133	23.6333	0.0295643	-0.0268214	0.981581	0.0443464	0.459845	0.636274
	28.53	23.5
	28.65	23.75
RII Col0 11LD	27.13	23.38	27.3133	23.44	0.0682355	1.17985	2.26552
	27.29	23.26
	27.52	23.68
RIII Col0 11LD	28.99	24.23	29.1167	24.29	0.0352394	0.226512	1.17
	29.25	24.27
	29.11	24.37
RI soc1 11LD	26.88	22.95	27.0333	23.1933	0.0698304	1.21318	2.31848	0.058876	0.815401	0.867956
	26.98	23.54
	27.24	23.09
RII soc1 11LD	26.69	23.01	26.9267	23.2867	0.0802141	1.41318	2.66323
	27.07	23.42
	27.02	23.43
RIII soc1 11LD	30.14	25.04	30.2533	25.02	0.0265833	-0.180155	0.882608
	30.35	24.92
	30.27	25.1
RI svp 11LD	25.98	24.48	25.9467	24.26	0.310644	3.36651	10.3139	0.224186	2.74318	0.869527
	25.92	24.15
	25.94	24.15
RII svp 11LD	25.22	23.19	25.14	23.2	0.260616	3.11318	8.65287
	25.12	23.13
	25.08	23.28
RIII svp 11LD	27.1	23.53	26.9	23.5967	0.101297	1.74985	3.36323
	26.71	23.78
	26.89	23.48
RI Col00 13LD	27.83	23.23	27.7	23.2533	0.0458585	0.606512	1.52257	0.036713	0.228734	0.51418
	27.51	23.2
	27.76	23.33
RII Col0 13LD	28.51	24.08	28.8333	24.2167	0.040761	0.436512	1.35333
	28.83	24.28
	29.16	24.29
RIII Col0 13LD	30.3	24.42	30.0267	24.6167	0.0235195	-0.356821	0.780883
	30.04	24.76
	29.74	24.67
RI soc1 13LD	28.68	24.23	28.95	24.28	0.0392817	0.383179	1.30421	0.0418465	0.467623	0.16988
	29.14	24.27
	29.03	24.34
RII soc1 13LD	29.42	24.63	29.3733	24.6767	0.0385623	0.356512	1.28033
	29.18	24.53
	29.52	24.87
RIII soc1 13LD	28.2	23.76	28.1467	23.7567	0.0476956	0.663179	1.58357
	28.17	23.74
	28.07	23.77
RI svp 13LD	27.12	22.59	27.1467	22.81	0.0494918	0.716512	1.6432	0.0690964	1.07429	0.708059
	27.11	22.94
	27.21	22.9
RII svp 13LD	29.32	24.97	29.5467	25.11	0.0461775	0.616512	1.53316
	29.42	25.14
	29.9	25.22
RIII svp 13LD	27.26	24.01	27.42	24.2567	0.11162	1.88985	3.70595
	27.66	24.32
	27.34	24.44
RI Col0 15LD	28.15	23.23	28.0233	23.1467	0.034039	0.176512	1.13015	0.0324561	0.0854009	0.316655
	27.9	23.07
	28.02	23.14
RII Col0 15LD	28.42	24.05	28.81	24.1033	0.0382959	0.346512	1.27148
	28.97	24
	29.04	24.26
RIII Col0 15LD	29.97	24.93	29.9933	24.6733	0.0250334	-0.266821	0.831149
	29.72	24.35
	30.29	24.74
RI soc1 15LD	25.81	22.15	25.89	22.2533	0.0803997	1.41651	2.66939	0.0644985	0.930956	0.92005
	25.83	22.6
	26.03	22.01
RII soc1 15LD	26.83	23.29	26.9633	23.4167	0.085575	1.50651	2.84122
	27.07	23.4
	26.99	23.56
RIII soc1 15LD	29.3	23.88	29.2	24.0167	0.0275208	-0.130155	0.913733
	29.23	24.11
	29.07	24.06
RI svp 15LD	28.29	22.69	28.13	22.5433	0.0208087	-0.533488	0.690882	0.0243938	-0.331266	0.335929
	28.09	22.31
	28.01	22.63
RII svp 15LD	28.14	23.09	28.1167	23.12	0.0313223	0.056512	1.03995
	28	23.13
	28.21	23.14
RIII svp 15LD	28.67	23.14	28.67	23.1	0.0210505	-0.516821	0.69891
	28.73	22.76
	28.61	23.4
RI Col0 17LD	28.58	22.82	28.5	22.9667	0.0215924	-0.480155	0.716901	0.0210492	-0.533488	0.270637
	28.46	23.15
	28.46	22.93
RII Col0 17LD	29.77	24.58	29.8967	24.55	0.024575	-0.293488	0.815927
	30.12	24.43
	29.8	24.64
RIII-Col0-17LD	30.65	24.71	30.5033	24.6233	0.0169802	-0.826821	0.56377
	30.55	24.59
	30.31	24.57
RI soc1 17LD	26.39	22.32	26.27	22.53	0.0748424	1.31318	2.48488	0.0781253	1.37096	0.133097
	26.27	22.57
	26.15	22.7
RII soc1 17LD	26.9	23.36	27.02	23.49	0.0865693	1.52318	2.87424
	26.98	23.13
	27.18	23.98
RIII soc1 17LD	28.72	26.1	28.44	24.6633	0.0729642	1.27651	2.42253
	28.14	23.91
	28.46	23.98
RI svp 17LD	27.07	22.19	27.02	22.2733	0.0372487	0.306512	1.23671	0.0342148	0.154845	0.363712
	26.91	22.24
	27.08	22.39
RII svp 17LD	29.71	24	29.3867	24.0733	0.0251494	-0.260155	0.834998
	29.16	24.26
	29.29	23.96
RIII svp 17LD	27.26	22.51	27.12	22.485	0.0402463	0.418179	1.33624
	27.28	22.46
	26.82	NA
RI Col0 19LD	27.44	22.42	27.44	22.55	0.0337259	0.163179	1.11975	0.0308913	0.026512	0.211266
	27.55	22.46
	27.33	22.77
RII Col0 19LD	27.67	22.46	27.6533	22.3833	0.0259162	-0.216821	0.860459
	27.31	22.37
	27.98	22.32
RIII Col0 19LD	27.57	22.48	27.28	22.36	0.0330318	0.133179	1.09671
	26.87	22.22
	27.4	22.38
RI soc1 19LD	36.12	NA						0.0645389	1.06818	0.426621
	37.85	NA
	36.1	NA
RII soc1 19LD	27.16	23.64	27.1667	23.4833	0.0778406	1.36985	2.58443
	27.2	23.38
	27.14	23.43
RIII soc1 19LD	27.87	23.53	27.6033	23.3167	0.0512371	0.766512	1.70115
	27.43	23.11
	27.51	23.31
RI svp 19LD	26.31	22.28	26.0733	22.2033	0.0683934	1.18318	2.27077	0.0503655	0.698734	0.422129
	25.74	22.09
	26.17	22.24
RII svp 19LD	28.3	23.5	28.1267	23.5767	0.0426888	0.503179	1.41733
	28.07	23.41
	28.01	23.82
RIII svp 19LD	27.6	22.97	27.5133	22.87	0.0400145	0.409845	1.32854
	27.59	22.71
	27.35	22.93

## Sheet: (ga2ox4)
Figure 6-source data1: Original RT-qPCR data of different genotypes for Figure 6C-D
	Ct(ga2ox4)	Ct(pex4)	Average (ga2ox4)	Average (pex4)	Log2DDCT	Dct	DDct	Biological replicat	Log2 Biological replicat	Standard Deviation
RI Col0 9LD	27.2	23.95	27.1033	24.1933	0.259896	0.133046	1.19739	0.111113	-0.0134369	0.237861
	27.06	24.37
	27.05	24.26											Log2 (GA2ox4)					Standard Deviation
RII Col0 9LD	28.15	25.14	28.35	25.0533	-0.12677	0.101766	0.91588							Col0	soc1-2	svp-41			Col0	soc1-2	svp-41
	28.5	25.01											9LD	-0.0134369	-0.531215	-0.702326		9LD	0.237861	0.54177	0.16365
	28.4	25.01											11LD	-1.19566	-0.838992	-2.40455		11LD	0.227458	0.202603	0.366141
RIII Col0 9LD	27.58	23.96	27.54	24.1967	-0.173437	0.0985273	0.886728						13LD	-1.24566	-0.985659	-3.05788		13LD	0.452945	0.110972	0.258228
	27.63	24.27											15LD	-1.8501	-1.16455	-2.91677		15LD	0.584123	0.447863	0.628473
	27.41	24.36											17LD	-1.94233	-0.618992	-3.52177		17LD	0.410478	0.417417	0.153903
RI soc1 9LD	26.61	23.32	26.6633	23.51	0.0165631	0.112396	1.01155	0.0805597	-0.531215	0.54177			19LD	-2.1301	-0.973437	-2.96899		19LD	0.199527	0.579828	1.48332
	26.5	NA
	26.88	23.7
RII soc1 9LD	27.47	23.43	27.38	23.1433	-1.06677	0.053044	0.477387
	27.33	22.94
	27.34	23.06
RIII soc1 9LD	27.16	23.3	27.1367	23.4233	-0.543437	0.0762387	0.686134
	27.08	23.4
	27.17	23.57
RI svp 9LD	27.54	23.69	27.5933	23.5867	-0.83677	0.0622119	0.559896	0.0685857	-0.702326	0.16365
	27.48	23.32
	27.76	23.75
RII svp 9LD	28.05	24.03	27.7767	24.0867	-0.520104	0.0774817	0.697322
	27.69	24.15
	27.59	24.08
RIII svp 9LD	28.16	24.24	28.0867	24.1667	-0.750104	0.0660636	0.594561
	28.24	24.05
	27.86	24.21
RI Col0 11LD	28.13	23.65	28.1667	23.6333	-1.36344	0.0431848	0.388655	0.0489241	-1.19566	0.227458
	28.15	23.5
	28.22	23.75
RII Col0 11LD	27.5	23.38	27.5467	23.44	-0.93677	0.0580457	0.522401
	27.24	23.26
	27.9	23.68
RIII Col0 11LD	28.28	24.23	28.7467	24.29	-1.28677	0.0455417	0.409868
	29.11	24.27
	28.85	24.37
RI soc1 11LD	27.15	22.95	27.3767	23.1933	-1.01344	0.0550416	0.495365	0.0625315	-0.838992	0.202603
	27.26	23.54
	27.72	23.09
RII soc1 11LD	27.19	23.01	27.0733	23.2867	-0.61677	0.0724602	0.652129
	27.31	23.42
	26.72	23.43
RIII soc1 11LD	29.18	25.04	29.0767	25.02	-0.88677	0.0600927	0.540824
	28.89	24.92
	29.16	25.1
RI svp 11LD	29.04	24.48	29.43	24.26	-2.0001	0.0277763	0.249982	0.0214527	-2.40455	0.366141
	29.64	24.15
	29.61	24.15
RII svp 11LD	29.03	23.19	28.87	23.2	-2.5001	0.0196408	0.176764
	28.79	23.13
	28.79	23.28
RIII svp 11LD	29.4	23.53	29.48	23.5967	-2.71344	0.016941	0.152466
	29.41	23.78
	29.63	23.48
RI Col00 13LD	27.91	23.23	28.1833	23.2533	-1.7601	0.0328036	0.295227	0.0483302	-1.24566	0.452945
	28.31	23.2
	28.33	23.33
RII Col0 13LD	28.28	24.08	28.4567	24.2167	-1.0701	0.0529216	0.476285
	28.33	24.28
	28.76	24.29
RIII Col0 13LD	28.86	24.42	28.6933	24.6167	-0.90677	0.0592654	0.533378
	28.5	24.76
	28.72	24.67
RI soc1 13LD	28.16	24.23	28.3633	24.28	-0.913437	0.0589921	0.530919	0.0562208	-0.985659	0.110972
	28.01	24.27
	28.92	24.34
RII soc1 13LD	28.87	24.63	28.7767	24.6767	-0.930104	0.0583146	0.524821
	28.67	24.53
	28.79	24.87
RIII soc1 13LD	28.06	23.76	28.04	23.7567	-1.11344	0.0513556	0.462192
	27.92	23.74
	28.14	23.77
RI svp 13LD	29.51	22.59	29.32	22.81	-3.3401	0.0109722	0.0987481	0.0134831	-3.05788	0.258228
	29.05	22.94
	29.4	22.9
RII svp 13LD	31.38	24.97	31.28	25.11	-3.0001	0.0138882	0.124991
	31.6	25.14
	30.86	25.22
RIII svp 13LD	30.14	24.01	30.26	24.2567	-2.83344	0.0155889	0.140298
	30.52	24.32
	30.12	24.44
RI Col0 15LD	28.7	23.23	28.7867	23.1467	-2.4701	0.0200535	0.180478	0.0324806	-1.8501	0.584123
	29.03	23.07
	28.63	23.14
RII Col0 15LD	29.03	24.05	29.0433	24.1033	-1.7701	0.0325771	0.293188
	28.78	24
	29.32	24.26
RIII Col0 15LD	29.04	24.93	29.1533	24.6733	-1.3101	0.0448111	0.403292
	29.3	24.35
	29.12	24.74
RI soc1 15LD	26.97	22.15	27.1	22.2533	-1.67677	0.0347543	0.312782	0.0510854	-1.16455	0.447863
	27.25	22.6
	27.08	22.01
RII soc1 15LD	27.14	23.29	27.4333	23.4167	-0.84677	0.0617821	0.556028
	27.53	23.4
	27.63	23.56
RIII soc1 15LD	28.29	23.88	28.1567	24.0167	-0.970104	0.0567199	0.510469
	28.09	24.11
	28.09	24.06
RI svp 15LD	29.06	22.69	29.1767	22.5433	-3.46344	0.0100732	0.0906571	0.0157032	-2.91677	0.628473
	29.21	22.31
	29.26	22.63
RII svp 15LD	28.61	23.09	28.52	23.12	-2.2301	0.0236831	0.213143
	28.31	23.13
	28.64	23.14
RIII svp 15LD	29.23	23.14	29.3267	23.1	-3.05677	0.0133532	0.120177
	29.5	22.76
	29.25	23.4
RI Col0 17LD	28.17	22.82	28.1933	22.9667	-2.05677	0.0267065	0.240354	0.0297255	-1.94233	0.410478
	28.24	23.15
	28.17	22.93
RII Col0 17LD	29.41	24.58	29.2067	24.55	-1.48677	0.0396464	0.35681
	29.11	24.43
	29.1	24.64
RIII-Col0-17LD	30.15	24.71	30.0767	24.6233	-2.28344	0.0228235	0.205408
	30.23	24.59
	29.85	24.57
RI soc1 17LD	26.76	22.32	26.75	22.53	-1.0501	0.0536603	0.482933	0.0743614	-0.618992	0.417417
	26.63	22.57
	26.86	22.7
RII soc1 17LD	27.12	23.36	26.8767	23.49	-0.21677	0.0956119	0.86049
	26.84	23.13
	26.67	23.98
RIII soc1 17LD	28.46	26.1	28.4233	24.6633	-0.590104	0.073812	0.664295
	28.34	23.91
	28.47	23.98
RI svp 17LD	28.92	22.19	29.0367	22.2733	-3.59344	0.00920521	0.0828453	0.00971148	-3.52177	0.153903
	29	22.24
	29.19	22.39
RII svp 17LD	31.22	24	30.87	24.0733	-3.62677	0.00899496	0.0809531
	30.3	24.26
	31.09	23.96
RIII svp 17LD	29.03	22.51	29	22.485	-3.3451	0.0109343	0.0984064
	NA	22.46
	28.97	NA
RI Col0 19LD	27.84	22.42	27.7467	22.55	-2.02677	0.0272676	0.245404	0.0255407	-2.1301	0.199527
	27.78	22.46
	27.62	22.77
RII Col0 19LD	27.79	22.46	27.9133	22.3833	-2.3601	0.0216423	0.194777
	27.72	22.37
	28.23	22.32
RIII Col0 19LD	27.66	22.48	27.5333	22.36	-2.00344	0.0277122	0.249405
	27.57	22.22
	27.37	22.38
RI soc1 19LD	NA	NA						0.0588897	-0.973437	0.579828
	NA	NA
	NA	NA
RII soc1 19LD	27.39	23.64	27.2167	23.4833	-0.563437	0.0751891	0.676688
	27.18	23.38
	27.08	23.43
RIII soc1 19LD	28.08	23.53	27.87	23.3167	-1.38344	0.0425902	0.383305
	27.69	23.11
	27.84	23.31
RI svp 19LD	26.79	22.28	26.63	22.2033	-1.25677	0.0464987	0.41848	0.0207278	-2.96899	1.48332
	26.6	22.09
	26.5	22.24
RII svp 19LD	30.12	23.5	30.5333	23.5767	-3.78677	0.00805072	0.072455
	30.4	23.41
	31.08	23.82
RIII svp 19LD	29.79	22.97	29.9033	22.87	-3.86344	0.00763406	0.0687052
	30.14	22.71
	29.78	22.93

## Sheet: (svp)
Figure 6-source data1: Original RT-qPCR data of different genotypes for Figure6-figure supplement 1C-D
	Ct(svp)	Ct(pex4)	Average (svp)	Average (pex4)	Log2DDCT	Dct	DDct	Biological replicat	Log2 Biological replicat	Standard Deviation
RI Col0 9LD	22.28	23.95	22.3767	24.1933	-0.0259539	3.52266	0.982171	3.58661	-0.000398351	0.0414103
	22.44	24.37
	22.41	24.26										Log2 (svp)					Standard Deviation
RII Col0 9LD	23.13	25.14	23.1633	25.0533	0.0473794	3.70635	1.03339						Col0	soc1-2	svp-41			Col0	soc1-2	svp-41
	23.21	25.01										9LD	-0.000398351	-0.555954	-0.941509		9LD	0.0414103	0.794362	0.377261
	23.15	25.01										11LD	0.142935	0.0284905	-0.827065		11LD	0.180041	0.300043	0.778177
RIII Col0 9LD	22.44	23.96	22.3767	24.1967	-0.0226206	3.53081	0.984443					13LD	0.131824	0.0862683	-1.43262		13LD	0.0616742	0.268211	0.366075
	22.32	24.27										15LD	0.330713	0.177379	-2.64707		15LD	0.224524	0.159478	0.368335
	22.37	24.36										17LD	0.371824	0.828491	-3.50873		17LD	0.216803	0.51404	0.520001
RI soc1 9LD	22.09	23.32	22.06	23.51	-0.392621	2.73208	0.761745	2.67877	-0.555954	0.794362		19LD	-0.591509	0.435713	-2.6804		19LD	0.568207	0.00707107	2.57755
	21.99	NA
	22.1	23.7
RII soc1 9LD	22.9	23.43	22.72	23.1433	-1.41929	1.34102	0.373897
	22.55	22.94
	22.71	23.06
RIII soc1 9LD	21.45	23.3	21.4367	23.4233	0.144046	3.9632	1.105
	21.43	23.4
	21.43	23.57
RI svp 9LD	23.04	23.69	23.05	23.5867	-1.30595	1.45062	0.404454	1.91068	-0.941509	0.377261
	23.07	23.32
	23.04	23.75
RII svp 9LD	23.32	24.03	23.21	24.0867	-0.965954	1.83613	0.51194
	23.15	24.15
	23.16	24.08
RIII svp 9LD	22.73	24.24	22.8767	24.1667	-0.552621	2.44528	0.681781
	23.14	24.05
	22.76	24.21
RI Col0 11LD	22.02	23.65	21.83	23.6333	-0.0392872	3.49026	0.973136	3.9807	0.142935	0.180041
	21.7	23.5
	21.77	23.75
RII Col0 11LD	21.29	23.38	21.45	23.44	0.147379	3.97237	1.10756
	21.48	23.26
	21.58	23.68
RIII Col0 11LD	22.17	24.23	22.1267	24.29	0.320713	4.47949	1.24895
	22.12	24.27
	22.09	24.37
RI soc1 11LD	21.23	22.95	21.5167	23.1933	-0.165954	3.19688	0.891339	3.71314	0.0284905	0.300043
	21.68	23.54
	21.64	23.09
RII soc1 11LD	21.67	23.01	21.5667	23.2867	-0.122621	3.29436	0.918518
	21.56	23.42
	21.47	23.43
RIII soc1 11LD	22.88	25.04	22.8033	25.02	0.374046	4.64818	1.29598
	22.7	24.92
	22.83	25.1
RI svp 11LD	22.32	24.48	22.3533	24.26	0.0640461	3.74942	1.04539	2.24187	-0.827065	0.778177
	22.41	24.15
	22.33	24.15
RII svp 11LD	22.94	23.19	22.73	23.2	-1.37262	1.38511	0.386189
	22.72	23.13
	22.53	23.28
RIII svp 11LD	22.85	23.53	22.9267	23.5967	-1.17262	1.59107	0.443615
	22.87	23.78
	23.06	23.48
RI Col00 13LD	21.26	23.23	21.24	23.2533	0.170713	4.03714	1.12561	3.93214	0.131824	0.0616742
	21.13	23.2
	21.33	23.33
RII Col0 13LD	22.36	24.08	22.3133	24.2167	0.0607128	3.74076	1.04298
	22.26	24.28
	22.32	24.29
RIII Col0 13LD	22.61	24.42	22.61	24.6167	0.164046	4.01853	1.12043
	22.59	24.76
	22.63	24.67
RI soc1 13LD	22.21	24.23	22.11	24.28	0.327379	4.50023	1.25473	3.85091	0.0862683	0.268211
	21.9	24.27
	22.22	24.34
RII soc1 13LD	23.05	24.63	22.7	24.6767	0.134046	3.93583	1.09737
	22.36	24.53
	22.69	24.87
RIII soc1 13LD	22.19	23.76	22.1167	23.7567	-0.202621	3.11666	0.868971
	22.11	23.74
	22.05	23.77
RI svp 13LD	22.74	22.59	22.6833	22.81	-1.71595	1.09177	0.304401	1.35848	-1.43262	0.366075
	22.62	22.94
	22.69	22.9
RII svp 13LD	24.84	24.97	24.83	25.11	-1.56262	1.21419	0.338536
	24.76	25.14
	24.89	25.22
RIII svp 13LD	23.32	24.01	23.4333	24.2567	-1.01929	1.76949	0.49336
	23.56	24.32
	23.42	24.44
RI Col0 15LD	21.09	23.23	21.23	23.1467	0.0740461	3.7755	1.05266	4.54614	0.330713	0.224524
	21.35	23.07
	21.25	23.14
RII Col0 15LD	21.72	24.05	21.77	24.1033	0.490713	5.03968	1.40514
	21.76	24
	21.83	24.26
RIII Col0 15LD	22.38	24.93	22.4033	24.6733	0.427379	4.82323	1.34479
	22.43	24.35
	22.4	24.74
RI soc1 15LD	20.36	22.15	20.4167	22.2533	-0.00595391	3.57184	0.995882	4.07204	0.177379	0.159478
	20.37	22.6
	20.52	22.01
RII soc1 15LD	21.2	23.29	21.32	23.4167	0.254046	4.2772	1.19255
	21.37	23.4
	21.39	23.56
RIII soc1 15LD	22.06	23.88	21.89	24.0167	0.284046	4.36707	1.2176
	21.82	24.11
	21.79	24.06
RI svp 15LD	23.53	22.69	23.61	22.5433	-2.90929	0.477421	0.133112	0.585652	-2.64707	0.368335
	23.8	22.31
	23.5	22.63
RII svp 15LD	24.06	23.09	24.0833	23.12	-2.80595	0.512871	0.142996
	24.1	23.13
	24.09	23.14
RIII svp 15LD	23.5	23.14	23.4833	23.1	-2.22595	0.766664	0.213757
	23.38	22.76
	23.57	23.4
RI Col0 17LD	21	22.82	20.8533	22.9667	0.270713	4.3269	1.2064	4.67699	0.371824	0.216803
	20.91	23.15
	20.65	22.93
RII Col0 17LD	22.38	24.58	22.4833	24.55	0.224046	4.18918	1.168
	22.66	24.43
	22.41	24.64
RIII-Col0-17LD	22.29	24.71	22.16	24.6233	0.620713	5.51489	1.53763
	22.1	24.59
	22.09	24.57
RI soc1 17LD	20.27	22.32	20.25	22.53	0.437379	4.85678	1.35414	6.65714	0.828491	0.51404
	20.3	22.57
	20.18	22.7
RII soc1 17LD	20.79	23.36	21.01	23.49	0.637379	5.57897	1.5555
	21.24	23.13
	21	23.98
RIII soc1 17LD	21.53	26.1	21.41	24.6633	1.41071	9.53566	2.65868
	21.31	23.91
	21.39	23.98
RI svp 17LD	24.07	22.19	24.1633	22.2733	-3.73262	0.269807	0.0752262	0.329767	-3.50873	0.520001
	24.13	22.24
	24.29	22.39
RII svp 17LD	26.27	24	26.11	24.0733	-3.87929	0.243726	0.0679545
	26.03	24.26
	26.03	23.96
RIII svp 17LD	23.5	22.51	23.5567	22.485	-2.91429	0.475769	0.132651
	23.52	22.46
	23.65	NA
RI Col0 19LD	21.04	22.42	20.9033	22.55	-0.195954	3.13109	0.872995	2.49611	-0.591509	0.568207
	20.84	22.46
	20.83	22.77
RII Col0 19LD	21.72	22.46	21.7833	22.3833	-1.24262	1.51572	0.422604
	21.53	22.37
	22.1	22.32
RIII Col0 19LD	20.94	22.48	20.8533	22.36	-0.335954	2.84153	0.79226
	20.82	22.22
	20.8	22.38
RI soc1 19LD	NA	NA						4.8512	0.435713	0.00707107
	NA	NA
	NA	NA
RII soc1 19LD	21.4	23.64	21.2	23.4833	0.440713	4.86801	1.35727
	21.23	23.38
	20.97	23.43
RIII soc1 19LD	21.05	23.53	21.0433	23.3167	0.430713	4.83439	1.3479
	20.87	23.11
	21.21	23.31
RI svp 19LD	20.15	22.28	20.1033	22.2033	0.257379	4.28709	1.19531	1.56935	-2.6804	2.57755
	20.11	22.09
	20.05	22.24
RII svp 19LD	26.37	23.5	26.2967	23.5767	-4.56262	0.151774	0.0423169
	26.16	23.41
	26.36	23.82
RIII svp 19LD	24.87	22.97	24.7633	22.87	-3.73595	0.269184	0.0750526
	24.7	22.71
	24.72	22.93

## Sheet: (soc1)
Figure 6-source data1: Original RT-qPCR data of different genotypes for Figure6-figure supplement 1A-B
	Ct(soc1)	Ct(pex4)	Average (soc1)	Average (pex4)	Log2DDCT	Dct	DDct	Biological replicat	Log2 Biological replicat	Standard Deviation
RI Col0 9LD	24.65	23.95	24.2667	24.1933	-0.327627	0.950439	0.796846	1.19275	-0.276516	1.11088
	23.95	24.37
	24.2	24.26										Log2(soc1)					Standard Deviation
RII Col0 9LD	24.02	25.14	23.94	25.0533	0.85904	2.16345	1.81383						Col0	soc1	svp			Col0	soc1	svp
	23.92	25.01										9LD	-0.276516	-2.64207	2.03237		9LD	1.11088	0.409096	0.517988
	23.88	25.01										11LD	0.682373	-1.15652	2.91237		11LD	0.197005	0.670276	0.825611
RIII Col0 9LD	25.35	23.96	25.3033	24.1967	-1.36096	0.464366	0.389323					13LD	0.596818	-1.34652	2.70904		13LD	0.315001	0.690349	0.635776
	25.17	24.27										15LD	1.49904	-0.838738	2.69126		15LD	0.269093	0.335863	0.154212
	25.39	24.36										17LD	1.79237	-0.419849	2.23293		17LD	0.438115	0.606633	0.378573
RI soc1 9LD	26.13	23.32	26.1633	23.51	-2.90763	0.158952	0.133265	0.196507	-2.64207	0.409096		19LD	1.04682	-0.754294	0.92904		19LD	0.529846	0.471405	1.77079
	26.19	NA
	26.17	23.7
RII soc1 9LD	26.07	23.43	25.7367	23.1433	-2.84763	0.165702	0.138925
	25.49	22.94
	25.65	23.06
RIII soc1 9LD	25.35	23.3	25.34	23.4233	-2.17096	0.264866	0.222063
	25.25	23.4
	25.42	23.57
RI svp 9LD	21.19	23.69	21.22	23.5867	2.11237	5.15748	4.32402	5.08547	2.03237	0.517988
	21.13	23.32
	21.34	23.75
RII svp 9LD	22.16	24.03	22.3533	24.0867	1.47904	3.32495	2.78763
	22.49	24.15
	22.41	24.08
RIII svp 9LD	21.57	24.24	21.4067	24.1667	2.50571	6.77396	5.67927
	21.21	24.05
	21.44	24.21
RI Col0 11LD	22.77	23.65	22.7933	23.6333	0.585706	1.79005	1.50077	1.92632	0.682373	0.197005
	22.66	23.5
	22.95	23.75
RII Col0 11LD	22.51	23.38	22.6333	23.44	0.552373	1.74917	1.4665
	22.59	23.26
	22.8	23.68
RIII Col0 11LD	22.94	24.23	23.1267	24.29	0.90904	2.23974	1.8778
	23.3	24.27
	23.14	24.37
RI soc1 11LD	24.19	22.95	24.3433	23.1933	-1.40429	0.450625	0.377803	0.577164	-1.15652	0.670276
	24.3	23.54
	24.54	23.09
RII soc1 11LD	24.89	23.01	24.7	23.2867	-1.66763	0.375443	0.314771
	24.48	23.42
	24.73	23.43
RIII soc1 11LD	25.22	25.04	25.1633	25.02	-0.397627	0.905425	0.759106
	25.19	24.92
	25.08	25.1
RI svp 11LD	20.29	24.48	20.2867	24.26	3.71904	15.707	13.1687	9.97423	2.91237	0.825611
	20.09	24.15
	20.48	24.15
RII svp 11LD	21.02	23.19	20.8767	23.2	2.06904	5.00487	4.19607
	20.81	23.13
	20.8	23.28
RIII svp 11LD	20.48	23.53	20.3933	23.5967	2.94904	9.21084	7.72235
	20.36	23.78
	20.34	23.48
RI Col00 13LD	22.57	23.23	22.6733	23.2533	0.325706	1.49485	1.25328	1.83337	0.596818	0.315001
	22.66	23.2
	22.79	23.33
RII Col0 13LD	23	24.08	23.02	24.2167	0.942373	2.29209	1.92169
	23.05	24.28
	23.01	24.29
RIII Col0 13LD	23.94	24.42	23.84	24.6167	0.522373	1.71317	1.43632
	23.7	24.76
	23.88	24.67
RI soc1 13LD	25.27	24.23	25.29	24.28	-1.26429	0.496546	0.416303	0.504501	-1.34652	0.690349
	25.27	24.27
	25.33	24.34
RII soc1 13LD	25.19	24.63	25.1233	24.6767	-0.70096	0.733736	0.615163
	25	24.53
	25.18	24.87
RIII soc1 13LD	25.68	23.76	25.5767	23.7567	-2.07429	0.283221	0.237452
	25.51	23.74
	25.54	23.77
RI svp 13LD	20.52	22.59	20.4367	22.81	2.11904	5.18137	4.34405	8.32691	2.70904	0.635776
	20.39	22.94
	20.4	22.9
RII svp 13LD	21.45	24.97	21.4733	25.11	3.38237	12.4379	10.4279
	21.41	25.14
	21.56	25.22
RIII svp 13LD	21.35	24.01	21.3767	24.2567	2.62571	7.3615	6.17186
	21.32	24.32
	21.46	24.44
RI Col0 15LD	21.7	23.23	21.4167	23.1467	1.47571	3.31728	2.7812	3.41089	1.49904	0.269093
	21.2	23.07
	21.35	23.14
RII Col0 15LD	22.62	24.05	22.6067	24.1033	1.24237	2.8219	2.36587
	22.65	24
	22.55	24.26
RIII Col0 15LD	22.66	24.93	22.64	24.6733	1.77904	4.0935	3.43198
	22.6	24.35
	22.66	24.74
RI soc1 15LD	23	22.15	23.0267	22.2533	-1.02763	0.585064	0.490516	0.67955	-0.838738	0.335863
	22.98	22.6
	23.1	22.01
RII soc1 15LD	24.19	23.29	24.2	23.4167	-1.03763	0.581023	0.487128
	24.11	23.4
	24.3	23.56
RIII soc1 15LD	24.22	23.88	24.2133	24.0167	-0.45096	0.872564	0.731556
	24.14	24.11
	24.28	24.06
RI svp 15LD	19.44	22.69	19.63	22.5433	2.65904	7.53357	6.31613	7.7334	2.69126	0.154212
	19.73	22.31
	19.72	22.63
RII svp 15LD	20.46	23.09	20.31	23.12	2.55571	7.01285	5.87955
	20.06	23.13
	20.41	23.14
RIII svp 15LD	19.69	23.14	19.9867	23.1	2.85904	8.6538	7.25532
	20.14	22.76
	20.13	23.4
RI Col0 17LD	21.22	22.82	21.42	22.9667	1.29237	2.92141	2.44931	4.25278	1.79237	0.438115
	21.41	23.15
	21.63	22.93
RII Col0 17LD	22.26	24.58	22.1867	24.55	2.10904	5.14558	4.31404
	22.13	24.43
	22.17	24.64
RIII-Col0-17LD	22.37	24.71	22.3933	24.6233	1.97571	4.69134	3.93321
	22.39	24.59
	22.42	24.57
RI soc1 17LD	23.35	22.32	23.3767	22.53	-1.10096	0.556068	0.466206	0.941631	-0.419849	0.606633
	23.41	22.57
	23.37	22.7
RII soc1 17LD	23.46	23.36	23.4567	23.49	-0.22096	1.02337	0.857994
	23.43	23.13
	23.48	23.98
RIII soc1 17LD	24.43	26.1	24.3467	24.6633	0.0623732	1.24545	1.04418
	24.24	23.91
	24.37	23.98
RI svp 17LD	20.09	22.19	20.1567	22.2733	1.86237	4.33691	3.63605	5.7371	2.23293	0.378573
	20.16	22.24
	20.22	22.39
RII svp 17LD	21.23	24	21.2	24.0733	2.61904	7.32756	6.14341
	21.21	24.26
	21.16	23.96
RIII svp 17LD	20.1	22.51	20.0133	22.485	2.21737	5.54684	4.65046
	20.02	22.46
	19.92	NA
RI Col0 19LD	21.18	22.42	21.09	22.55	1.20571	2.75108	2.3065	2.57061	1.04682	0.529846
	20.97	22.46
	21.12	22.77
RII Col0 19LD	21.85	22.46	21.6733	22.3833	0.455706	1.6358	1.37145
	21.46	22.37
	21.71	22.32
RIII Col0 19LD	20.86	22.48	20.6267	22.36	1.47904	3.32495	2.78763
	20.48	22.22
	20.54	22.38
RI soc1 19LD	NA	NA						0.726065	-0.754294	0.471405
	NA	NA
	NA	NA
RII soc1 19LD	24.58	23.64	24.3167	23.4833	-1.08763	0.561231	0.470535
	24.18	23.38
	24.19	23.43
RIII soc1 19LD	23.56	23.53	23.4833	23.3167	-0.42096	0.890899	0.746927
	23.4	23.11
	23.49	23.31
RI svp 19LD	23.14	22.28	23.03	22.2033	-1.08096	0.56383	0.472714	3.30389	0.92904	1.77079
	22.96	22.09
	22.99	22.24
RII svp 19LD	21.9	23.5	21.7133	23.5767	1.60904	3.63847	3.05049
	21.71	23.41
	21.53	23.82
RIII svp 19LD	20.36	22.97	20.3567	22.87	2.25904	5.70938	4.78673
	20.44	22.71
	20.27	22.93
