# Supplementary material for: Regulation of shoot meristem shape by photoperiodic signaling and phytohormones during floral induction of Arabidopsis
Source: eLife journal article supplement (doi:10.7554/elife.60661), 2020-12-14
Supplement: supp [file elife-60661-supp-v1.zip › elife_poa_e60661_Figure_6_source_data_2.xlsx]

## Sheet: Sheet2 (2)
Figure 6-source data 2: Leaf number of different genotypes for Figure 6E-G
Total leaf number at flowering (Fig 7E)
	Col-0	ga20ox2	ga3ox1	ga2ox4	soc1	soc1ga20ox2	soc1ga3ox1	soc1ga2ox4
1	23	21	22	20	35	41	35	34
2	23	22	22	23	41	43	35	35
3	24	21	23	24	34	40	37	37
4	24	23	22	23	36	40	36	37
5	22	20	24	25	36	40	36	36
6	23	22	23	22	34	39	37	36
7	22	21	22	23	36	42	36	35
8	22	25	23	17	37	40	40	33
9	24	21	24	22	36	47	37	38
10	22	21	22	21	32	41	36	37
11	23	24	23	23	34	40	35	35
12	23	24	24	24	34	42	36	33
13	22	22	22	24	34	41	36	34
14	25	19	NA	22	31	37	36	33
Rosette leaf number at flowering (Fig 7F)
	Col-0	ga20ox2	ga3ox1	ga2ox4	soc1	soc1ga20ox2	soc1ga3ox1	soc1ga2ox4
1	18	18	17	15	27	38	29	26
2	18	19	18	17	33	38	30	26
3	18	18	19	18	27	36	31	27
4	19	21	17	18	29	38	32	29
5	18	18	19	20	29	37	30	28
6	19	19	19	17	28	36	31	28
7	18	18	18	17	28	38	31	29
8	17	22	19	13	30	37	33	26
9	19	19	19	17	29	42	31	29
10	17	18	18	16	26	38	31	29
11	18	21	18	17	27	37	31	27
12	17	21	19	18	29	38	31	25
13	17	19	18	18	28	38	30	25
14	19	17	NA	17	25	35	31	26
Cauline leaf number at flowering (Fig 7G)
	Col-0	ga20ox2	ga3ox1	ga2ox4	soc1	soc1ga20ox2	soc1ga3ox1	soc1ga2ox4
1	5	3	5	5	8	3	6	8
2	5	3	4	6	8	5	5	9
3	6	3	4	6	7	4	6	10
4	5	2	5	5	7	2	4	8
5	4	2	5	5	7	3	6	8
6	4	3	4	5	6	3	6	8
7	4	3	4	6	8	4	5	6
8	5	3	4	4	7	3	7	7
9	5	2	5	5	7	5	6	9
10	5	3	4	5	6	3	5	8
11	5	3	5	6	7	3	4	8
12	6	3	5	6	5	4	5	8
13	5	3	4	6	6	3	6	9
14	6	2	NA	5	6	2	5	7
