# Supplementary material for: Regulation of shoot meristem shape by photoperiodic signaling and phytohormones during floral induction of Arabidopsis
Source: eLife journal article supplement (doi:10.7554/elife.60661), 2020-12-14
Supplement: supp [file elife-60661-supp-v1.zip › elife_poa_e60661_Figure_7_source_data_1.xlsx]

## Sheet: Sheet1
Figure 7-source data 1: Original data of meristem area and cell number of each genotype for Figure 7B-C
Genotype	Time point	Plant number	Meristem area (µm^2)	Cell number in the meristem area
Col-0	2wSD	1	2787.88	88
Col-0	2wSD	3	2499.6	72
Col-0	2wSD	5	2078.9	68
Col-0	+3LD	2	8377.93	201
Col-0	+3LD	7	8977.45	189
Col-0	+3LD	8	8668.41	182
Col-0	+3LD	9	6010.43	120
Col-0	+5LD	1	18946.1	359
Col-0	+5LD	2	19617.8	382
Col-0	+5LD	3	19829.5	388
Col-0	+5LD	5	20582	392
Col-0	+7LD	1	12176.2	352
Col-0	+7LD	2	14752.7	402
Col-0	+7LD	7	12946.9	400
Col-0	+7LD	9	15073.3	393
Col-0	+9LD	1	12994	410
Col-0	+9LD	2	10784.2	333
Col-0	+9LD	3	10757.8	342
Col-0	+9LD	4	12593	358
soc1-2	2wSD	1	2533.6	77
soc1-2	2wSD	2	3206.3	96
soc1-2	2wSD	5	3217.43	93
soc1-2	+3LD	1	7674.92	176
soc1-2	+3LD	3	7048	176
soc1-2	+3LD	7	8014.83	189
soc1-2	+5LD	1	16443.6	335
soc1-2	+5LD	2	16137.4	330
soc1-2	+5LD	6	14395.8	291
soc1-2	+5LD	7	18376	351
soc1-2	+7LD	3	19160.4	380
soc1-2	+7LD	5	19422.7	362
soc1-2	+7LD	7	21825.3	435
soc1-2	+7LD	8	17847.2	400
soc1-2	+9LD	4	14790.8	354
soc1-2	+9LD	7	13857	332
soc1-2	+9LD	8	13967.1	318
