# Supplementary material for: Regulation of shoot meristem shape by photoperiodic signaling and phytohormones during floral induction of Arabidopsis
Source: eLife journal article supplement (doi:10.7554/elife.60661), 2020-12-14
Supplement: supp [file elife-60661-supp-v1.zip › elife_poa_e60661_Figure_7_source_data_2.xlsx]

## Sheet: Dataset2
Figure 7-source data 2: Original data of cell size of each genotype for Figure 7D
Genotype	Time point	Plant number	Cell label	Cell area (µm^2)	Distance from the central cell
Col-0	2wSD	1	302	12.6202	1
Col-0	2wSD	1	315	23.1741	8
Col-0	2wSD	1	319	26.7286	6
Col-0	2wSD	1	323	19.9615	1
Col-0	2wSD	1	324	32.3807	2
Col-0	2wSD	1	326	28.2598	7
Col-0	2wSD	1	328	20.45	5
Col-0	2wSD	1	330	27.9714	4
Col-0	2wSD	1	335	41.6837	7
Col-0	2wSD	1	374	15.0586	7
Col-0	2wSD	1	375	21.0836	6
Col-0	2wSD	1	383	18.4091	2
Col-0	2wSD	1	384	31.4593	2
Col-0	2wSD	1	385	30.8149	3
Col-0	2wSD	1	388	25.6179	4
Col-0	2wSD	1	389	30.386	1
Col-0	2wSD	1	390	36.9805	4
Col-0	2wSD	1	393	22.9509	3
Col-0	2wSD	1	400	38.2875	1
Col-0	2wSD	1	401	43.8774	4
Col-0	2wSD	1	403	50.3168	3
Col-0	2wSD	1	405	41.2649	4
Col-0	2wSD	1	406	29.2823	4
Col-0	2wSD	1	408	45.6867	3
Col-0	2wSD	1	414	39.1084	3
Col-0	2wSD	1	420	27.9412	5
Col-0	2wSD	1	459	35.1411	3
Col-0	2wSD	1	497	40.0139	8
Col-0	2wSD	1	505	28.9163	7
Col-0	2wSD	1	513	32.043	3
Col-0	2wSD	1	518	36.5915	2
Col-0	2wSD	1	519	35.9602	3
Col-0	2wSD	1	522	35.9211	5
Col-0	2wSD	1	523	33.7277	4
Col-0	2wSD	1	524	19.0793	2
Col-0	2wSD	1	530	19.8322	3
Col-0	2wSD	1	534	32.9992	1
Col-0	2wSD	1	542	16.0738	3
Col-0	2wSD	1	544	33.6592	2
Col-0	2wSD	1	549	32.2234	6
Col-0	2wSD	1	553	28.0167	4
Col-0	2wSD	1	554	49.6045	3
Col-0	2wSD	1	556	36.2439	4
Col-0	2wSD	1	568	22.0674	8
Col-0	2wSD	1	569	38.461	5
Col-0	2wSD	1	611	50.0975	9
Col-0	2wSD	1	618	49.0988	8
Col-0	2wSD	1	619	24.429	7
Col-0	2wSD	1	622	28.2649	6
Col-0	2wSD	1	627	19.7747	5
Col-0	2wSD	1	628	26.6222	4
Col-0	2wSD	1	630	27.8999	3
Col-0	2wSD	1	636	19.6529	4
Col-0	2wSD	1	637	42.2767	3
Col-0	2wSD	1	642	47.8674	7
Col-0	2wSD	1	643	36.5535	6
Col-0	2wSD	1	646	32.1541	4
Col-0	2wSD	1	652	31.2079	0
Col-0	2wSD	1	653	24.3952	2
Col-0	2wSD	1	654	30.6591	5
Col-0	2wSD	1	657	30.1045	4
Col-0	2wSD	1	658	23.6919	5
Col-0	2wSD	1	660	24.1497	5
Col-0	2wSD	1	661	32.4918	1
Col-0	2wSD	1	662	22.0148	2
Col-0	2wSD	1	663	31.3376	4
Col-0	2wSD	1	664	47.378	6
Col-0	2wSD	1	666	32.6183	2
Col-0	2wSD	1	667	30.7105	2
Col-0	2wSD	1	668	39.1659	5
Col-0	2wSD	1	674	38.8947	3
Col-0	2wSD	1	675	29.8536	3
Col-0	2wSD	1	678	54.2089	4
Col-0	2wSD	1	680	37.7287	4
Col-0	2wSD	1	681	31.3874	5
Col-0	2wSD	1	684	22.1691	4
Col-0	2wSD	1	690	47.7688	4
Col-0	2wSD	1	692	13.8003	3
Col-0	2wSD	1	693	23.1946	2
Col-0	2wSD	1	698	23.6609	4
Col-0	2wSD	1	711	20.9066	4
Col-0	2wSD	1	712	23.0144	5
Col-0	2wSD	1	729	54.7893	9
Col-0	2wSD	1	730	37.7553	9
Col-0	2wSD	1	731	46.1037	8
Col-0	2wSD	1	732	30.0389	8
Col-0	2wSD	1	733	30.5391	10
Col-0	2wSD	1	734	29.1143	11
Col-0	+3LD	2	2	43.4688	5
Col-0	+3LD	2	7	65.8719	5
Col-0	+3LD	2	14	34.7339	10
Col-0	+3LD	2	15	27.5505	3
Col-0	+3LD	2	18	37.2848	3
Col-0	+3LD	2	19	39.125	9
Col-0	+3LD	2	20	45.7471	7
Col-0	+3LD	2	21	30.84	6
Col-0	+3LD	2	23	40.9251	5
Col-0	+3LD	2	27	38.1784	5
Col-0	+3LD	2	28	46.0482	4
Col-0	+3LD	2	30	39.1737	7
Col-0	+3LD	2	51	49.8195	7
Col-0	+3LD	2	53	58.7904	9
Col-0	+3LD	2	58	48.9313	9
Col-0	+3LD	2	61	38.1681	5
Col-0	+3LD	2	62	28.3964	5
Col-0	+3LD	2	65	28.1783	5
Col-0	+3LD	2	66	25.6248	4
Col-0	+3LD	2	68	21.6596	5
Col-0	+3LD	2	70	55.7011	6
Col-0	+3LD	2	71	36.0227	5
Col-0	+3LD	2	72	28.2384	6
Col-0	+3LD	2	80	36.2268	7
Col-0	+3LD	2	86	47.3905	8
Col-0	+3LD	2	87	41.2681	4
Col-0	+3LD	2	99	57.0076	4
Col-0	+3LD	2	107	38.8172	3
Col-0	+3LD	2	108	29.9105	4
Col-0	+3LD	2	115	37.4388	3
Col-0	+3LD	2	117	45.0744	7
Col-0	+3LD	2	118	36.5553	9
Col-0	+3LD	2	120	39.3512	6
Col-0	+3LD	2	125	60.698	7
Col-0	+3LD	2	129	43.0961	3
Col-0	+3LD	2	132	47.4349	7
Col-0	+3LD	2	133	49.6012	3
Col-0	+3LD	2	136	23.1514	7
Col-0	+3LD	2	141	48.5927	1
Col-0	+3LD	2	142	37.7428	3
Col-0	+3LD	2	144	51.1369	7
Col-0	+3LD	2	146	33.0507	2
Col-0	+3LD	2	156	53.3316	8
Col-0	+3LD	2	160	56.5532	5
Col-0	+3LD	2	170	67.204	8
Col-0	+3LD	2	171	26.2703	8
Col-0	+3LD	2	174	70.6496	10
Col-0	+3LD	2	175	26.9629	8
Col-0	+3LD	2	183	36.5938	7
Col-0	+3LD	2	186	54.8524	5
Col-0	+3LD	2	191	34.1513	7
Col-0	+3LD	2	192	26.798	6
Col-0	+3LD	2	194	26.3254	8
Col-0	+3LD	2	197	52.2839	7
Col-0	+3LD	2	198	36.5154	4
Col-0	+3LD	2	199	30.5346	8
Col-0	+3LD	2	209	64.7094	7
Col-0	+3LD	2	212	51.8407	7
Col-0	+3LD	2	218	44.7999	6
Col-0	+3LD	2	220	28.0932	6
Col-0	+3LD	2	227	42.5939	6
Col-0	+3LD	2	229	59.4171	3
Col-0	+3LD	2	230	47.729	8
Col-0	+3LD	2	231	48.7961	6
Col-0	+3LD	2	238	30.3042	2
Col-0	+3LD	2	239	42.0466	5
Col-0	+3LD	2	243	31.2124	6
Col-0	+3LD	2	244	23.0312	3
Col-0	+3LD	2	251	27.7504	1
Col-0	+3LD	2	253	46.6308	8
Col-0	+3LD	2	254	29.1191	5
Col-0	+3LD	2	255	42.9651	7
Col-0	+3LD	2	256	33.4323	8
Col-0	+3LD	2	268	35.1351	4
Col-0	+3LD	2	269	64.5592	3
Col-0	+3LD	2	270	31.0743	7
Col-0	+3LD	2	271	41.9757	9
Col-0	+3LD	2	279	36.497	1
Col-0	+3LD	2	281	50.2746	10
Col-0	+3LD	2	283	55.5659	10
Col-0	+3LD	2	288	25.6119	3
Col-0	+3LD	2	314	38.9401	2
Col-0	+3LD	2	315	29.4239	3
Col-0	+3LD	2	331	49.8908	4
Col-0	+3LD	2	336	49.3861	6
Col-0	+3LD	2	350	42.2199	7
Col-0	+3LD	2	353	32.9257	4
Col-0	+3LD	2	371	49.4434	8
Col-0	+3LD	2	372	31.9576	7
Col-0	+3LD	2	373	61.5403	10
Col-0	+3LD	2	375	31.7029	4
Col-0	+3LD	2	378	50.1067	5
Col-0	+3LD	2	379	50.4752	6
Col-0	+3LD	2	390	62.7469	6
Col-0	+3LD	2	391	28.9889	8
Col-0	+3LD	2	392	62.849	6
Col-0	+3LD	2	399	35.1867	4
Col-0	+3LD	2	400	48.8758	4
Col-0	+3LD	2	409	50.0011	8
Col-0	+3LD	2	410	33.7189	9
Col-0	+3LD	2	411	39.558	10
Col-0	+3LD	2	412	32.2479	6
Col-0	+3LD	2	417	50.9407	6
Col-0	+3LD	2	418	59.8438	7
Col-0	+3LD	2	419	50.8641	6
Col-0	+3LD	2	421	32.6443	8
Col-0	+3LD	2	426	51.8145	6
Col-0	+3LD	2	428	30.6926	7
Col-0	+3LD	2	434	51.1652	4
Col-0	+3LD	2	435	27.2318	9
Col-0	+3LD	2	440	57.8785	4
Col-0	+3LD	2	441	34.5516	4
Col-0	+3LD	2	443	20.8923	7
Col-0	+3LD	2	448	34.5991	7
Col-0	+3LD	2	449	27.5871	9
Col-0	+3LD	2	450	36.1047	10
Col-0	+3LD	2	455	53.2757	3
Col-0	+3LD	2	456	48.2713	4
Col-0	+3LD	2	458	45.9462	5
Col-0	+3LD	2	460	43.0995	5
Col-0	+3LD	2	461	38.563	6
Col-0	+3LD	2	462	29.8159	6
Col-0	+3LD	2	463	25.0028	8
Col-0	+3LD	2	468	34.7732	4
Col-0	+3LD	2	470	25.1283	7
Col-0	+3LD	2	471	30.6709	8
Col-0	+3LD	2	478	49.7679	2
Col-0	+3LD	2	479	42.3231	2
Col-0	+3LD	2	486	31.9116	6
Col-0	+3LD	2	487	24.6095	3
Col-0	+3LD	2	490	29.8684	2
Col-0	+3LD	2	492	39.8117	7
Col-0	+3LD	2	493	27.1763	6
Col-0	+3LD	2	496	49.0426	7
Col-0	+3LD	2	497	45.9773	2
Col-0	+3LD	2	499	43.9099	6
Col-0	+3LD	2	508	65.4222	3
Col-0	+3LD	2	516	18.2834	1
Col-0	+3LD	2	517	22.2166	7
Col-0	+3LD	2	518	23.7868	6
Col-0	+3LD	2	519	42.5705	8
Col-0	+3LD	2	525	42.6813	0
Col-0	+3LD	2	527	41.8014	7
Col-0	+3LD	2	533	34.5248	9
Col-0	+3LD	2	535	61.3477	9
Col-0	+3LD	2	536	55.4731	8
Col-0	+3LD	2	540	45.1544	8
Col-0	+3LD	2	545	51.1113	2
Col-0	+3LD	2	546	61.3503	5
Col-0	+3LD	2	547	38.6267	6
Col-0	+3LD	2	548	35.6658	5
Col-0	+3LD	2	549	29.4288	2
Col-0	+3LD	2	550	19.3459	3
Col-0	+3LD	2	551	54.9347	1
Col-0	+3LD	2	552	37.657	2
Col-0	+3LD	2	553	60.616	5
Col-0	+3LD	2	554	53.5161	4
Col-0	+3LD	2	555	54.8026	4
Col-0	+3LD	2	556	56.924	5
Col-0	+3LD	2	557	30.7662	6
Col-0	+3LD	2	558	49.7794	6
Col-0	+3LD	2	559	21.9257	5
Col-0	+3LD	2	560	66.3784	6
Col-0	+3LD	2	561	63.9731	6
Col-0	+3LD	2	562	35.5333	7
Col-0	+3LD	2	563	37.2851	7
Col-0	+3LD	2	564	62.4512	8
Col-0	+3LD	2	565	51.9979	8
Col-0	+3LD	2	566	51.7625	7
Col-0	+3LD	2	567	33.631	8
Col-0	+3LD	2	568	61.2933	9
Col-0	+3LD	2	596	64.7461	9
Col-0	+3LD	2	660	37.7894	5
Col-0	+3LD	2	661	32.0088	5
Col-0	+3LD	2	662	44.3486	5
Col-0	+3LD	2	663	31.9445	4
Col-0	+3LD	2	664	24.9192	4
Col-0	+3LD	2	665	25.6713	3
Col-0	+3LD	2	666	27.192	2
Col-0	+3LD	2	667	25.8174	2
Col-0	+3LD	2	668	29.8541	5
Col-0	+3LD	2	669	40.1327	5
Col-0	+3LD	2	670	47.6373	5
Col-0	+3LD	2	671	51.6953	4
Col-0	+3LD	2	672	37.6302	6
Col-0	+3LD	2	673	52.0772	7
Col-0	+3LD	2	677	41.9484	8
Col-0	+3LD	2	678	53.3845	10
Col-0	+3LD	2	683	35.32	7
Col-0	+3LD	2	685	26.39	8
Col-0	+3LD	2	686	42.7103	8
Col-0	+3LD	2	694	51.1139	9
Col-0	+3LD	2	695	31.4399	9
Col-0	+3LD	2	698	62.4324	9
Col-0	+3LD	2	700	40.9197	8
Col-0	+3LD	2	701	55.6302	9
Col-0	+3LD	2	702	35.2133	8
Col-0	+3LD	2	703	35.4171	10
Col-0	+3LD	2	704	38.2655	9
Col-0	+3LD	2	706	59.0997	9
Col-0	+3LD	2	1389	37.0104	5
Col-0	+3LD	7	7	42.2403	2
Col-0	+3LD	7	10	43.5902	3
Col-0	+3LD	7	12	48.2174	4
Col-0	+3LD	7	15	57.5646	5
Col-0	+3LD	7	16	60.5618	8
Col-0	+3LD	7	17	57.7241	6
Col-0	+3LD	7	26	28.9506	6
Col-0	+3LD	7	30	62.8796	7
Col-0	+3LD	7	31	54.3069	7
Col-0	+3LD	7	34	37.7042	5
Col-0	+3LD	7	35	40.961	9
Col-0	+3LD	7	36	67.6066	5
Col-0	+3LD	7	39	39.6037	7
Col-0	+3LD	7	40	51.7575	5
Col-0	+3LD	7	57	41.1271	7
Col-0	+3LD	7	58	58.8175	4
Col-0	+3LD	7	60	53.965	4
Col-0	+3LD	7	101	27.3785	8
Col-0	+3LD	7	102	62.4707	5
Col-0	+3LD	7	106	44.0839	7
Col-0	+3LD	7	107	58.613	5
Col-0	+3LD	7	109	80.8776	8
Col-0	+3LD	7	110	38.8824	9
Col-0	+3LD	7	112	63.8185	4
Col-0	+3LD	7	117	37.7327	4
Col-0	+3LD	7	119	32.9156	5
Col-0	+3LD	7	121	28.5975	7
Col-0	+3LD	7	122	47.762	8
Col-0	+3LD	7	123	57.6506	7
Col-0	+3LD	7	126	50.0836	5
Col-0	+3LD	7	133	60.9401	5
Col-0	+3LD	7	134	68.6521	3
Col-0	+3LD	7	136	39.9597	6
Col-0	+3LD	7	141	47.0193	9
Col-0	+3LD	7	144	19.3091	0
Col-0	+3LD	7	145	75.0397	7
Col-0	+3LD	7	149	40.2475	7
Col-0	+3LD	7	152	64.482	1
Col-0	+3LD	7	154	63.2936	8
Col-0	+3LD	7	156	59.2254	9
Col-0	+3LD	7	166	55.2188	7
Col-0	+3LD	7	167	29.2834	2
Col-0	+3LD	7	169	59.3962	2
Col-0	+3LD	7	170	42.8271	3
Col-0	+3LD	7	171	46.6158	6
Col-0	+3LD	7	188	49.3882	6
Col-0	+3LD	7	202	56.1151	3
Col-0	+3LD	7	229	63.8341	6
Col-0	+3LD	7	230	51.3005	7
Col-0	+3LD	7	231	55.7846	4
Col-0	+3LD	7	241	43.6125	9
Col-0	+3LD	7	243	43.2874	5
Col-0	+3LD	7	254	31.9414	8
Col-0	+3LD	7	259	77.238	9
Col-0	+3LD	7	260	33.9887	6
Col-0	+3LD	7	261	26.6184	7
Col-0	+3LD	7	265	39.176	5
Col-0	+3LD	7	270	63.9607	6
Col-0	+3LD	7	275	44.2933	7
Col-0	+3LD	7	277	67.7539	5
Col-0	+3LD	7	282	77.5427	10
Col-0	+3LD	7	283	48.7263	7
Col-0	+3LD	7	284	44.6079	8
Col-0	+3LD	7	287	46.8974	6
Col-0	+3LD	7	288	48.6059	6
Col-0	+3LD	7	289	48.2045	6
Col-0	+3LD	7	290	59.8647	9
Col-0	+3LD	7	295	51.7062	8
Col-0	+3LD	7	296	44.9208	7
Col-0	+3LD	7	301	25.1083	3
Col-0	+3LD	7	304	54.437	10
Col-0	+3LD	7	305	47.6518	8
Col-0	+3LD	7	307	75.7329	9
Col-0	+3LD	7	310	50.856	4
Col-0	+3LD	7	311	50.3404	5
Col-0	+3LD	7	313	36.846	12
Col-0	+3LD	7	316	43.7502	10
Col-0	+3LD	7	318	49.7179	7
Col-0	+3LD	7	319	32.9223	8
Col-0	+3LD	7	321	43.165	7
Col-0	+3LD	7	324	39.3174	3
Col-0	+3LD	7	329	56.8494	10
Col-0	+3LD	7	330	45.1625	7
Col-0	+3LD	7	331	36.3182	9
Col-0	+3LD	7	334	30.9512	7
Col-0	+3LD	7	336	52.2349	11
Col-0	+3LD	7	337	55.9593	9
Col-0	+3LD	7	339	57.9061	6
Col-0	+3LD	7	341	44.0811	4
Col-0	+3LD	7	342	31.5749	10
Col-0	+3LD	7	343	27.7166	7
Col-0	+3LD	7	346	60.4571	5
Col-0	+3LD	7	348	35.0266	7
Col-0	+3LD	7	351	52.9917	9
Col-0	+3LD	7	352	46.453	4
Col-0	+3LD	7	353	52.4325	2
Col-0	+3LD	7	355	49.2202	11
Col-0	+3LD	7	356	33.2828	5
Col-0	+3LD	7	381	41.6588	3
Col-0	+3LD	7	385	38.2773	7
Col-0	+3LD	7	423	34.6095	4
Col-0	+3LD	7	426	32.3621	7
Col-0	+3LD	7	435	35.9362	7
Col-0	+3LD	7	442	57.8853	4
Col-0	+3LD	7	449	29.1775	8
Col-0	+3LD	7	465	75.6642	4
Col-0	+3LD	7	470	49.643	6
Col-0	+3LD	7	473	38.0423	7
Col-0	+3LD	7	476	53.0549	6
Col-0	+3LD	7	477	31.6188	6
Col-0	+3LD	7	478	26.5372	6
Col-0	+3LD	7	481	49.3921	6
Col-0	+3LD	7	487	49.5357	5
Col-0	+3LD	7	489	53.3603	7
Col-0	+3LD	7	490	41.9213	5
Col-0	+3LD	7	494	43.1537	5
Col-0	+3LD	7	497	52.6858	6
Col-0	+3LD	7	500	71.8154	6
Col-0	+3LD	7	503	40.8377	5
Col-0	+3LD	7	504	46.572	4
Col-0	+3LD	7	516	52.9091	7
Col-0	+3LD	7	517	42.327	8
Col-0	+3LD	7	522	36.6053	8
Col-0	+3LD	7	524	39.2751	6
Col-0	+3LD	7	527	49.5448	11
Col-0	+3LD	7	529	35.321	4
Col-0	+3LD	7	530	71.5522	3
Col-0	+3LD	7	531	55.1163	4
Col-0	+3LD	7	536	47.8185	10
Col-0	+3LD	7	538	42.4662	4
Col-0	+3LD	7	545	45.1432	6
Col-0	+3LD	7	546	43.256	4
Col-0	+3LD	7	549	55.8268	11
Col-0	+3LD	7	551	45.3471	3
Col-0	+3LD	7	552	49.3569	6
Col-0	+3LD	7	553	34.1683	5
Col-0	+3LD	7	555	47.5872	7
Col-0	+3LD	7	560	45.808	9
Col-0	+3LD	7	562	54.9844	7
Col-0	+3LD	7	564	52.697	3
Col-0	+3LD	7	565	36.9789	9
Col-0	+3LD	7	566	54.0734	10
Col-0	+3LD	7	569	50.1222	2
Col-0	+3LD	7	571	41.2203	6
Col-0	+3LD	7	577	31.8848	11
Col-0	+3LD	7	578	37.7043	8
Col-0	+3LD	7	580	30.211	7
Col-0	+3LD	7	581	54.5074	6
Col-0	+3LD	7	582	41.4313	4
Col-0	+3LD	7	583	35.3672	1
Col-0	+3LD	7	584	38.1502	2
Col-0	+3LD	7	594	32.6608	2
Col-0	+3LD	7	596	65.8899	6
Col-0	+3LD	7	599	37.7242	8
Col-0	+3LD	7	601	58.9233	5
Col-0	+3LD	7	603	37.92	2
Col-0	+3LD	7	604	30.1657	1
Col-0	+3LD	7	605	36.2853	4
Col-0	+3LD	7	612	56.6797	6
Col-0	+3LD	7	614	41.8074	2
Col-0	+3LD	7	617	31.4413	8
Col-0	+3LD	7	625	38.0478	2
Col-0	+3LD	7	626	37.9451	3
Col-0	+3LD	7	629	42.0045	8
Col-0	+3LD	7	630	42.6148	3
Col-0	+3LD	7	633	51.8285	1
Col-0	+3LD	7	636	53.3255	12
Col-0	+3LD	7	637	37.8817	6
Col-0	+3LD	7	643	49.5619	2
Col-0	+3LD	7	644	33.2519	3
Col-0	+3LD	7	645	27.6145	4
Col-0	+3LD	7	646	21.9326	5
Col-0	+3LD	7	647	55.3809	10
Col-0	+3LD	7	650	26.5759	6
Col-0	+3LD	7	653	70.6392	8
Col-0	+3LD	7	656	35.0904	3
Col-0	+3LD	7	2602	74.6199	5
Col-0	+3LD	7	2603	88.9009	6
Col-0	+3LD	7	2610	52.744	10
Col-0	+3LD	7	2612	67.9293	5
Col-0	+3LD	7	2613	58.278	5
Col-0	+3LD	7	2614	62.3608	6
Col-0	+3LD	7	2615	89.7636	6
Col-0	+3LD	7	2624	59.1188	5
Col-0	+3LD	7	2625	57.4298	5
Col-0	+3LD	7	2631	28.6539	8
Col-0	+3LD	7	2633	26.2686	8
Col-0	+3LD	7	2635	21.9174	10
Col-0	+3LD	7	2636	55.9786	10
Col-0	2wSD	5	2	34.0414	2
Col-0	2wSD	5	17	20.1341	6
Col-0	2wSD	5	18	45.7101	5
Col-0	2wSD	5	19	24.012	4
Col-0	2wSD	5	20	19.5998	4
Col-0	2wSD	5	21	39.1866	2
Col-0	2wSD	5	22	26.9596	2
Col-0	2wSD	5	35	43.6323	6
Col-0	2wSD	5	38	39.4319	4
Col-0	2wSD	5	40	20.4409	5
Col-0	2wSD	5	48	37.1732	4
Col-0	2wSD	5	51	19.6276	6
Col-0	2wSD	5	56	28.9925	2
Col-0	2wSD	5	63	23.3219	3
Col-0	2wSD	5	67	36.0046	3
Col-0	2wSD	5	68	27.2448	3
Col-0	2wSD	5	81	28.6631	3
Col-0	2wSD	5	82	19.7336	4
Col-0	2wSD	5	89	25.5397	3
Col-0	2wSD	5	95	39.8087	3
Col-0	2wSD	5	96	27.895	2
Col-0	2wSD	5	99	24.5837	1
Col-0	2wSD	5	101	21.5828	4
Col-0	2wSD	5	104	19.1787	4
Col-0	2wSD	5	117	21.4355	1
Col-0	2wSD	5	126	25.5486	5
Col-0	2wSD	5	127	29.4897	6
Col-0	2wSD	5	138	42.4668	4
Col-0	2wSD	5	141	42.6584	3
Col-0	2wSD	5	145	15.6278	3
Col-0	2wSD	5	148	19.3957	3
Col-0	2wSD	5	150	34.5471	2
Col-0	2wSD	5	151	32.5917	2
Col-0	2wSD	5	163	34.6469	1
Col-0	2wSD	5	172	31.7999	7
Col-0	2wSD	5	179	27.4624	2
Col-0	2wSD	5	180	44.0474	6
Col-0	2wSD	5	185	28.4253	2
Col-0	2wSD	5	187	26.4873	4
Col-0	2wSD	5	188	29.8904	7
Col-0	2wSD	5	191	38.3483	2
Col-0	2wSD	5	193	32.711	3
Col-0	2wSD	5	195	40.276	5
Col-0	2wSD	5	199	22.5147	3
Col-0	2wSD	5	200	31.1633	4
Col-0	2wSD	5	206	40.0745	3
Col-0	2wSD	5	208	45.0391	3
Col-0	2wSD	5	215	40.6153	1
Col-0	2wSD	5	217	34.1486	5
Col-0	2wSD	5	219	29.0009	3
Col-0	2wSD	5	220	24.5797	4
Col-0	2wSD	5	226	40.5498	1
Col-0	2wSD	5	233	47.2922	6
Col-0	2wSD	5	236	48.228	3
Col-0	2wSD	5	241	33.8492	2
Col-0	2wSD	5	242	21.1721	4
Col-0	2wSD	5	245	33.9249	1
Col-0	2wSD	5	246	58.1139	0
Col-0	2wSD	5	247	21.8816	1
Col-0	2wSD	5	248	20.6429	1
Col-0	2wSD	5	249	22.4146	5
Col-0	2wSD	5	250	18.2265	5
Col-0	2wSD	5	263	15.0217	6
Col-0	2wSD	5	264	30.6248	2
Col-0	2wSD	5	265	26.0252	1
Col-0	2wSD	5	266	26.1803	2
Col-0	2wSD	5	267	36.3328	3
Col-0	2wSD	5	272	20.9254	4
Col-0	2wSD	3	170	26.0404	0
Col-0	2wSD	3	51	29.6473	1
Col-0	2wSD	3	189	29.2897	1
Col-0	2wSD	3	308	44.1958	1
Col-0	2wSD	3	316	29.9182	1
Col-0	2wSD	3	326	29.1634	1
Col-0	2wSD	3	331	25.9039	1
Col-0	2wSD	3	79	26.2737	2
Col-0	2wSD	3	165	53.3681	2
Col-0	2wSD	3	181	50.9356	2
Col-0	2wSD	3	196	50.7546	2
Col-0	2wSD	3	203	45.7216	2
Col-0	2wSD	3	291	40.5807	2
Col-0	2wSD	3	298	44.8003	2
Col-0	2wSD	3	309	28.7398	2
Col-0	2wSD	3	315	41.7302	2
Col-0	2wSD	3	336	24.3459	2
Col-0	2wSD	3	384	43.7695	2
Col-0	2wSD	3	42	34.2004	3
Col-0	2wSD	3	85	22.8029	3
Col-0	2wSD	3	91	39.4785	3
Col-0	2wSD	3	145	34.0168	3
Col-0	2wSD	3	202	21.9448	3
Col-0	2wSD	3	212	27.0813	3
Col-0	2wSD	3	281	23.9356	3
Col-0	2wSD	3	296	33.7097	3
Col-0	2wSD	3	300	31.9616	3
Col-0	2wSD	3	311	35.9834	3
Col-0	2wSD	3	327	37.3459	3
Col-0	2wSD	3	346	52.0051	3
Col-0	2wSD	3	353	30.0219	3
Col-0	2wSD	3	374	27.2304	3
Col-0	2wSD	3	375	37.6987	3
Col-0	2wSD	3	385	39.9684	3
Col-0	2wSD	3	25	24.0066	4
Col-0	2wSD	3	63	37.3135	4
Col-0	2wSD	3	76	40.0464	4
Col-0	2wSD	3	98	40.6887	4
Col-0	2wSD	3	103	25.2217	4
Col-0	2wSD	3	138	34.2252	4
Col-0	2wSD	3	139	23.9306	4
Col-0	2wSD	3	213	34.6612	4
Col-0	2wSD	3	250	40.2882	4
Col-0	2wSD	3	251	41.1791	4
Col-0	2wSD	3	277	30.2435	4
Col-0	2wSD	3	292	21.0913	4
Col-0	2wSD	3	301	29.2209	4
Col-0	2wSD	3	365	35.3838	4
Col-0	2wSD	3	41	43.2653	5
Col-0	2wSD	3	129	33.5156	5
Col-0	2wSD	3	134	18.2374	5
Col-0	2wSD	3	135	46.1766	5
Col-0	2wSD	3	140	21.641	5
Col-0	2wSD	3	146	25.9846	5
Col-0	2wSD	3	149	32.6852	5
Col-0	2wSD	3	150	21.5959	5
Col-0	2wSD	3	269	34.397	5
Col-0	2wSD	3	271	28.0034	5
Col-0	2wSD	3	272	30.5246	5
Col-0	2wSD	3	276	41.525	5
Col-0	2wSD	3	285	51.8491	5
Col-0	2wSD	3	362	34.8081	5
Col-0	2wSD	3	34	35.8988	6
Col-0	2wSD	3	69	48.1588	6
Col-0	2wSD	3	182	50.3559	6
Col-0	2wSD	3	270	49.0342	6
Col-0	2wSD	3	24	21.3635	7
Col-0	2wSD	3	68	40.3696	7
Col-0	2wSD	3	72	33.8693	7
Col-0	2wSD	3	267	37.706	7
Col-0	2wSD	3	280	29.0761	8
Col-0	2wSD	3	381	37.4947	8
Col-0	+3LD	8	450	49.9173	0
Col-0	+3LD	8	35	44.7548	1
Col-0	+3LD	8	94	23.2739	1
Col-0	+3LD	8	99	43.3937	1
Col-0	+3LD	8	158	40.0308	1
Col-0	+3LD	8	335	19.1819	1
Col-0	+3LD	8	358	58.8608	1
Col-0	+3LD	8	359	37.3561	1
Col-0	+3LD	8	65	57.3016	2
Col-0	+3LD	8	152	54.8061	2
Col-0	+3LD	8	204	43.3784	2
Col-0	+3LD	8	208	42.1784	2
Col-0	+3LD	8	241	35.938	2
Col-0	+3LD	8	254	40.4332	2
Col-0	+3LD	8	325	50.7612	2
Col-0	+3LD	8	342	52.4662	2
Col-0	+3LD	8	363	31.0587	2
Col-0	+3LD	8	369	57.5438	2
Col-0	+3LD	8	463	71.2366	2
Col-0	+3LD	8	20	34.0582	3
Col-0	+3LD	8	36	47.7159	3
Col-0	+3LD	8	37	39.3767	3
Col-0	+3LD	8	71	53.7269	3
Col-0	+3LD	8	106	37.8079	3
Col-0	+3LD	8	119	34.5095	3
Col-0	+3LD	8	200	58.4795	3
Col-0	+3LD	8	209	39.4757	3
Col-0	+3LD	8	234	44.4945	3
Col-0	+3LD	8	328	31.4543	3
Col-0	+3LD	8	330	33.6167	3
Col-0	+3LD	8	348	41.4701	3
Col-0	+3LD	8	362	52.4984	3
Col-0	+3LD	8	422	42.573	3
Col-0	+3LD	8	426	31.4728	3
Col-0	+3LD	8	436	52.3361	3
Col-0	+3LD	8	438	37.5568	3
Col-0	+3LD	8	451	63.4515	3
Col-0	+3LD	8	12	45.963	4
Col-0	+3LD	8	14	26.6296	4
Col-0	+3LD	8	44	24.2469	4
Col-0	+3LD	8	48	41.4476	4
Col-0	+3LD	8	69	52.2066	4
Col-0	+3LD	8	77	38.3797	4
Col-0	+3LD	8	78	39.1243	4
Col-0	+3LD	8	143	40.4431	4
Col-0	+3LD	8	156	46.5576	4
Col-0	+3LD	8	171	41.342	4
Col-0	+3LD	8	222	38.0869	4
Col-0	+3LD	8	242	68.1056	4
Col-0	+3LD	8	292	44.6587	4
Col-0	+3LD	8	293	47.0699	4
Col-0	+3LD	8	294	43.5781	4
Col-0	+3LD	8	324	49.9371	4
Col-0	+3LD	8	357	52.7556	4
Col-0	+3LD	8	406	46.7846	4
Col-0	+3LD	8	409	37.404	4
Col-0	+3LD	8	420	22.1307	4
Col-0	+3LD	8	421	37.7174	4
Col-0	+3LD	8	439	38.591	4
Col-0	+3LD	8	443	74.4622	4
Col-0	+3LD	8	462	38.8491	4
Col-0	+3LD	8	27	63.442	5
Col-0	+3LD	8	49	58.8152	5
Col-0	+3LD	8	132	24.5996	5
Col-0	+3LD	8	155	67.2402	5
Col-0	+3LD	8	170	40.4425	5
Col-0	+3LD	8	172	48.3992	5
Col-0	+3LD	8	183	60.852	5
Col-0	+3LD	8	199	55.1143	5
Col-0	+3LD	8	201	54.2966	5
Col-0	+3LD	8	202	40.5283	5
Col-0	+3LD	8	210	41.809	5
Col-0	+3LD	8	270	53.4068	5
Col-0	+3LD	8	284	46.0583	5
Col-0	+3LD	8	288	29.5695	5
Col-0	+3LD	8	301	59.0618	5
Col-0	+3LD	8	302	38.774	5
Col-0	+3LD	8	314	33.6119	5
Col-0	+3LD	8	320	35.2329	5
Col-0	+3LD	8	338	61.5201	5
Col-0	+3LD	8	344	70.7617	5
Col-0	+3LD	8	388	43.3468	5
Col-0	+3LD	8	390	54.0891	5
Col-0	+3LD	8	404	46.9916	5
Col-0	+3LD	8	407	52.1494	5
Col-0	+3LD	8	414	63.3404	5
Col-0	+3LD	8	423	58.4344	5
Col-0	+3LD	8	440	38.073	5
Col-0	+3LD	8	464	68.2387	5
Col-0	+3LD	8	7	47.2547	6
Col-0	+3LD	8	29	37.4339	6
Col-0	+3LD	8	30	64.6014	6
Col-0	+3LD	8	53	32.9723	6
Col-0	+3LD	8	85	38.7229	6
Col-0	+3LD	8	86	41.4343	6
Col-0	+3LD	8	95	50.3719	6
Col-0	+3LD	8	128	30.1792	6
Col-0	+3LD	8	130	52.1077	6
Col-0	+3LD	8	192	51.484	6
Col-0	+3LD	8	195	59.0256	6
Col-0	+3LD	8	198	42.6798	6
Col-0	+3LD	8	203	61.6743	6
Col-0	+3LD	8	212	45.7248	6
Col-0	+3LD	8	221	36.0377	6
Col-0	+3LD	8	289	45.2072	6
Col-0	+3LD	8	304	35.8689	6
Col-0	+3LD	8	311	51.2513	6
Col-0	+3LD	8	323	51.5758	6
Col-0	+3LD	8	347	25.4308	6
Col-0	+3LD	8	371	72.3887	6
Col-0	+3LD	8	389	55.4831	6
Col-0	+3LD	8	403	35.0595	6
Col-0	+3LD	8	428	46.6369	6
Col-0	+3LD	8	434	64.5061	6
Col-0	+3LD	8	447	46.6212	6
Col-0	+3LD	8	9	49.8637	7
Col-0	+3LD	8	11	65.4678	7
Col-0	+3LD	8	26	43.323	7
Col-0	+3LD	8	31	42.7052	7
Col-0	+3LD	8	33	66.5306	7
Col-0	+3LD	8	34	44.6456	7
Col-0	+3LD	8	68	58.4145	7
Col-0	+3LD	8	83	28.9042	7
Col-0	+3LD	8	93	40.1238	7
Col-0	+3LD	8	117	53.7206	7
Col-0	+3LD	8	139	49.8572	7
Col-0	+3LD	8	147	52.0784	7
Col-0	+3LD	8	165	48.524	7
Col-0	+3LD	8	197	46.5544	7
Col-0	+3LD	8	207	38.0872	7
Col-0	+3LD	8	211	25.4154	7
Col-0	+3LD	8	218	45.412	7
Col-0	+3LD	8	236	59.2762	7
Col-0	+3LD	8	283	32.4194	7
Col-0	+3LD	8	310	35.2478	7
Col-0	+3LD	8	331	42.7193	7
Col-0	+3LD	8	345	45.0553	7
Col-0	+3LD	8	374	34.9071	7
Col-0	+3LD	8	417	78.0165	7
Col-0	+3LD	8	430	60.9549	7
Col-0	+3LD	8	458	73.4843	7
Col-0	+3LD	8	5	46.3751	8
Col-0	+3LD	8	80	43.4664	8
Col-0	+3LD	8	101	38.4335	8
Col-0	+3LD	8	122	34.7917	8
Col-0	+3LD	8	124	74.7653	8
Col-0	+3LD	8	134	48.6782	8
Col-0	+3LD	8	164	70.8696	8
Col-0	+3LD	8	176	73.4191	8
Col-0	+3LD	8	206	26.8719	8
Col-0	+3LD	8	262	34.535	8
Col-0	+3LD	8	282	81.2697	8
Col-0	+3LD	8	286	22.2802	8
Col-0	+3LD	8	305	92.659	8
Col-0	+3LD	8	309	38.3966	8
Col-0	+3LD	8	318	40.4696	8
Col-0	+3LD	8	346	44.2944	8
Col-0	+3LD	8	378	30.2187	8
Col-0	+3LD	8	397	55.3779	8
Col-0	+3LD	8	408	58.2219	8
Col-0	+3LD	8	480	69.3414	8
Col-0	+3LD	8	488	53.431	8
Col-0	+3LD	8	23	41.0911	9
Col-0	+3LD	8	88	41.7521	9
Col-0	+3LD	8	120	49.1489	9
Col-0	+3LD	8	160	57.7459	9
Col-0	+3LD	8	166	47.3741	9
Col-0	+3LD	8	168	65.7609	9
Col-0	+3LD	8	227	69.741	9
Col-0	+3LD	8	271	59.3581	9
Col-0	+3LD	8	290	39.804	9
Col-0	+3LD	8	354	57.5213	9
Col-0	+3LD	8	402	40.0151	9
Col-0	+3LD	8	437	38.5155	9
Col-0	+3LD	8	479	65.2899	9
Col-0	+3LD	8	116	47.8028	10
Col-0	+3LD	8	144	50.6298	10
Col-0	+3LD	8	240	80.4708	10
Col-0	+3LD	8	272	27.6276	10
Col-0	+3LD	8	486	28.1072	10
Col-0	+3LD	8	127	69.1255	11
Col-0	+3LD	8	167	55.3046	11
Col-0	+3LD	9	3195	59.4486	3
Col-0	+3LD	9	3200	42.5346	4
Col-0	+3LD	9	3201	36.9716	4
Col-0	+3LD	9	3215	33.3198	7
Col-0	+3LD	9	3216	41.311	6
Col-0	+3LD	9	3217	58.6668	5
Col-0	+3LD	9	3218	32.442	3
Col-0	+3LD	9	3220	46.687	5
Col-0	+3LD	9	3223	46.8911	2
Col-0	+3LD	9	3224	50.9778	7
Col-0	+3LD	9	3227	28.0177	6
Col-0	+3LD	9	3229	40.8284	5
Col-0	+3LD	9	3230	70.4249	4
Col-0	+3LD	9	3252	47.0948	4
Col-0	+3LD	9	3255	46.3296	6
Col-0	+3LD	9	3260	73.9774	4
Col-0	+3LD	9	3261	45.7926	4
Col-0	+3LD	9	3266	44.6064	1
Col-0	+3LD	9	3268	47.8387	5
Col-0	+3LD	9	3269	50.1004	5
Col-0	+3LD	9	3270	47.7256	3
Col-0	+3LD	9	3283	43.5851	2
Col-0	+3LD	9	3285	72.0469	5
Col-0	+3LD	9	3286	42.0607	4
Col-0	+3LD	9	3287	30.3485	3
Col-0	+3LD	9	3292	66.4451	6
Col-0	+3LD	9	3303	60.1682	6
Col-0	+3LD	9	3316	49.8484	6
Col-0	+3LD	9	3318	43.0848	4
Col-0	+3LD	9	3322	79.0971	7
Col-0	+3LD	9	3325	53.2685	2
Col-0	+3LD	9	3328	45.4646	3
Col-0	+3LD	9	3329	28.4609	4
Col-0	+3LD	9	3339	61.114	5
Col-0	+3LD	9	3343	35.4451	6
Col-0	+3LD	9	3344	40.2338	5
Col-0	+3LD	9	3367	63.1238	3
Col-0	+3LD	9	3374	49.4297	3
Col-0	+3LD	9	3379	61.0173	4
Col-0	+3LD	9	3385	62.4762	7
Col-0	+3LD	9	3386	36.0115	4
Col-0	+3LD	9	3388	45.9518	1
Col-0	+3LD	9	3393	52.2602	6
Col-0	+3LD	9	3407	38.6475	6
Col-0	+3LD	9	3424	56.7486	6
Col-0	+3LD	9	3451	53.1286	6
Col-0	+3LD	9	3452	58.0047	4
Col-0	+3LD	9	3457	55.2293	7
Col-0	+3LD	9	3458	58.3291	6
Col-0	+3LD	9	3464	45.0656	7
Col-0	+3LD	9	3466	58.3025	4
Col-0	+3LD	9	3468	61.2934	3
Col-0	+3LD	9	3469	35.8749	9
Col-0	+3LD	9	3473	45.6683	3
Col-0	+3LD	9	3474	49.0971	8
Col-0	+3LD	9	3478	72.6343	4
Col-0	+3LD	9	3479	42.299	2
Col-0	+3LD	9	3480	63.0143	6
Col-0	+3LD	9	3482	63.0564	6
Col-0	+3LD	9	3488	52.4056	7
Col-0	+3LD	9	3493	64.1236	5
Col-0	+3LD	9	3497	29.4615	1
Col-0	+3LD	9	3503	35.3212	3
Col-0	+3LD	9	3516	47.736	2
Col-0	+3LD	9	3518	46.4191	5
Col-0	+3LD	9	3528	54.6653	3
Col-0	+3LD	9	3529	33.6836	3
Col-0	+3LD	9	3534	31.5661	5
Col-0	+3LD	9	3540	53.4785	6
Col-0	+3LD	9	3544	68.0758	5
Col-0	+3LD	9	3550	42.0676	5
Col-0	+3LD	9	3558	59.9141	6
Col-0	+3LD	9	3570	55.4679	3
Col-0	+3LD	9	3573	61.0889	2
Col-0	+3LD	9	3575	18.3993	2
Col-0	+3LD	9	3577	54.2832	2
Col-0	+3LD	9	3578	63.8259	6
Col-0	+3LD	9	3581	47.1502	5
Col-0	+3LD	9	3582	34.4183	5
Col-0	+3LD	9	3589	48.2102	1
Col-0	+3LD	9	3592	50.8813	9
Col-0	+3LD	9	3594	59.9141	1
Col-0	+3LD	9	3604	52.5518	5
Col-0	+3LD	9	3606	51.7187	0
Col-0	+3LD	9	3607	49.6623	2
Col-0	+3LD	9	3608	45.3761	2
Col-0	+3LD	9	3614	39.2963	3
Col-0	+3LD	9	3622	40.7839	6
Col-0	+3LD	9	3623	63.2661	6
Col-0	+3LD	9	3628	43.4561	2
Col-0	+3LD	9	3631	30.8084	4
Col-0	+3LD	9	3633	51.8672	2
Col-0	+3LD	9	3642	40.424	3
Col-0	+3LD	9	3643	42.4935	6
Col-0	+3LD	9	3649	49.1732	4
Col-0	+3LD	9	3652	44.8263	5
Col-0	+3LD	9	3658	58.6204	6
Col-0	+3LD	9	3659	47.3224	5
Col-0	+3LD	9	3660	45.6219	4
Col-0	+3LD	9	3666	57.0826	5
Col-0	+3LD	9	3710	38.4531	5
Col-0	+3LD	9	3715	35.8594	4
Col-0	+3LD	9	3716	43.8057	7
Col-0	+3LD	9	3718	39.8371	5
Col-0	+3LD	9	3719	40.5326	2
Col-0	+3LD	9	3720	41.4245	5
Col-0	+3LD	9	3723	30.9941	6
Col-0	+3LD	9	3724	61.9931	10
Col-0	+3LD	9	3726	41.4194	1
Col-0	+3LD	9	3728	37.3598	1
Col-0	+3LD	9	3729	58.3057	4
Col-0	+3LD	9	3738	55.0379	5
Col-0	+3LD	9	3755	54.1058	2
Col-0	+3LD	9	3756	65.4953	3
Col-0	+3LD	9	3757	63.6198	4
Col-0	+3LD	9	3758	69.3478	4
Col-0	+3LD	9	3759	76.7751	5
Col-0	+3LD	9	3760	86.8876	4
Col-0	+3LD	9	3761	69.1302	3
Col-0	+3LD	9	3787	63.8131	4
Col-0	+5LD	1	362	36.0979	0
Col-0	+5LD	1	197	41.8715	1
Col-0	+5LD	1	204	57.5152	1
Col-0	+5LD	1	361	42.3551	1
Col-0	+5LD	1	363	63.6074	1
Col-0	+5LD	1	947	69.5376	1
Col-0	+5LD	1	54	41.7519	2
Col-0	+5LD	1	171	60.2309	2
Col-0	+5LD	1	188	46.3538	2
Col-0	+5LD	1	347	45.2526	2
Col-0	+5LD	1	636	28.6787	2
Col-0	+5LD	1	658	42.0126	2
Col-0	+5LD	1	743	42.5941	2
Col-0	+5LD	1	755	51.3669	2
Col-0	+5LD	1	785	35.2127	2
Col-0	+5LD	1	948	58.3575	2
Col-0	+5LD	1	954	25.1189	2
Col-0	+5LD	1	955	47.2306	2
Col-0	+5LD	1	968	51.9449	2
Col-0	+5LD	1	55	36.0541	3
Col-0	+5LD	1	164	68.1154	3
Col-0	+5LD	1	205	29.965	3
Col-0	+5LD	1	338	46.1527	3
Col-0	+5LD	1	341	52.0535	3
Col-0	+5LD	1	615	53.043	3
Col-0	+5LD	1	646	53.6607	3
Col-0	+5LD	1	677	50.2756	3
Col-0	+5LD	1	745	44.8342	3
Col-0	+5LD	1	846	45.2504	3
Col-0	+5LD	1	847	34.4006	3
Col-0	+5LD	1	865	46.6147	3
Col-0	+5LD	1	949	59.0775	3
Col-0	+5LD	1	956	72.589	3
Col-0	+5LD	1	957	61.0555	3
Col-0	+5LD	1	962	70.4218	3
Col-0	+5LD	1	53	47.2934	4
Col-0	+5LD	1	153	63.4484	4
Col-0	+5LD	1	156	38.8787	4
Col-0	+5LD	1	159	53.8363	4
Col-0	+5LD	1	236	43.9604	4
Col-0	+5LD	1	334	68.1338	4
Col-0	+5LD	1	578	55.0491	4
Col-0	+5LD	1	588	48.6793	4
Col-0	+5LD	1	660	44.0091	4
Col-0	+5LD	1	678	39.631	4
Col-0	+5LD	1	714	34.1439	4
Col-0	+5LD	1	721	59.2616	4
Col-0	+5LD	1	757	32.2577	4
Col-0	+5LD	1	771	45.5779	4
Col-0	+5LD	1	793	54.2581	4
Col-0	+5LD	1	887	41.3315	4
Col-0	+5LD	1	894	56.8135	4
Col-0	+5LD	1	952	81.794	4
Col-0	+5LD	1	958	46.253	4
Col-0	+5LD	1	960	71.1344	4
Col-0	+5LD	1	969	77.2851	4
Col-0	+5LD	1	970	68.6795	4
Col-0	+5LD	1	973	71.529	4
Col-0	+5LD	1	22	47.7369	5
Col-0	+5LD	1	146	45.372	5
Col-0	+5LD	1	151	50.6669	5
Col-0	+5LD	1	166	69.4252	5
Col-0	+5LD	1	237	74.4698	5
Col-0	+5LD	1	243	50.2358	5
Col-0	+5LD	1	258	47.96	5
Col-0	+5LD	1	327	44.5864	5
Col-0	+5LD	1	348	59.6393	5
Col-0	+5LD	1	353	25.4759	5
Col-0	+5LD	1	373	58.5347	5
Col-0	+5LD	1	397	42.3751	5
Col-0	+5LD	1	552	66.3528	5
Col-0	+5LD	1	572	53.6266	5
Col-0	+5LD	1	590	35.0811	5
Col-0	+5LD	1	647	38.4315	5
Col-0	+5LD	1	697	63.2557	5
Col-0	+5LD	1	822	46.9405	5
Col-0	+5LD	1	842	60.3685	5
Col-0	+5LD	1	888	43.5725	5
Col-0	+5LD	1	915	60.8761	5
Col-0	+5LD	1	953	73.8569	5
Col-0	+5LD	1	959	38.4468	5
Col-0	+5LD	1	961	69.8126	5
Col-0	+5LD	1	963	56.3346	5
Col-0	+5LD	1	964	90.2668	5
Col-0	+5LD	1	965	75.2859	5
Col-0	+5LD	1	966	44.4416	5
Col-0	+5LD	1	978	63.5002	5
Col-0	+5LD	1	988	83.6292	5
Col-0	+5LD	1	992	40.0648	5
Col-0	+5LD	1	20	34.257	6
Col-0	+5LD	1	32	54.3682	6
Col-0	+5LD	1	129	41.5113	6
Col-0	+5LD	1	134	47.8812	6
Col-0	+5LD	1	140	59.2403	6
Col-0	+5LD	1	145	55.734	6
Col-0	+5LD	1	208	43.1442	6
Col-0	+5LD	1	250	39.9914	6
Col-0	+5LD	1	337	69.2191	6
Col-0	+5LD	1	344	47.5605	6
Col-0	+5LD	1	376	34.5948	6
Col-0	+5LD	1	394	57.5741	6
Col-0	+5LD	1	534	38.5627	6
Col-0	+5LD	1	546	73.6358	6
Col-0	+5LD	1	560	35.7333	6
Col-0	+5LD	1	566	56.7543	6
Col-0	+5LD	1	579	58.1679	6
Col-0	+5LD	1	587	64.1188	6
Col-0	+5LD	1	591	69.8191	6
Col-0	+5LD	1	611	42.1272	6
Col-0	+5LD	1	623	44.724	6
Col-0	+5LD	1	627	65.0928	6
Col-0	+5LD	1	642	40.1849	6
Col-0	+5LD	1	679	23.2652	6
Col-0	+5LD	1	689	76.6995	6
Col-0	+5LD	1	715	46.5797	6
Col-0	+5LD	1	740	61.6642	6
Col-0	+5LD	1	841	78.616	6
Col-0	+5LD	1	867	59.9273	6
Col-0	+5LD	1	886	49.6685	6
Col-0	+5LD	1	906	43.5779	6
Col-0	+5LD	1	921	58.3825	6
Col-0	+5LD	1	967	51.2358	6
Col-0	+5LD	1	975	55.6811	6
Col-0	+5LD	1	989	49.2257	6
Col-0	+5LD	1	990	63.345	6
Col-0	+5LD	1	991	30.6562	6
Col-0	+5LD	1	33	48.161	7
Col-0	+5LD	1	34	41.2499	7
Col-0	+5LD	1	120	53.3487	7
Col-0	+5LD	1	128	72.4721	7
Col-0	+5LD	1	175	57.2796	7
Col-0	+5LD	1	201	34.3745	7
Col-0	+5LD	1	217	82.9442	7
Col-0	+5LD	1	238	37.7599	7
Col-0	+5LD	1	251	62.9036	7
Col-0	+5LD	1	265	46.064	7
Col-0	+5LD	1	314	52.5699	7
Col-0	+5LD	1	366	50.134	7
Col-0	+5LD	1	416	43.6381	7
Col-0	+5LD	1	419	41.633	7
Col-0	+5LD	1	420	54.525	7
Col-0	+5LD	1	425	73.6745	7
Col-0	+5LD	1	451	44.101	7
Col-0	+5LD	1	512	83.8995	7
Col-0	+5LD	1	532	63.7908	7
Col-0	+5LD	1	535	67.6595	7
Col-0	+5LD	1	543	89.4521	7
Col-0	+5LD	1	544	45.1949	7
Col-0	+5LD	1	561	48.5155	7
Col-0	+5LD	1	567	70.6775	7
Col-0	+5LD	1	571	90.1725	7
Col-0	+5LD	1	573	31.9014	7
Col-0	+5LD	1	580	36.4319	7
Col-0	+5LD	1	601	83.9384	7
Col-0	+5LD	1	616	59.1774	7
Col-0	+5LD	1	688	60.3917	7
Col-0	+5LD	1	693	48.0795	7
Col-0	+5LD	1	719	26.3697	7
Col-0	+5LD	1	739	39.4824	7
Col-0	+5LD	1	796	62.3511	7
Col-0	+5LD	1	877	62.5468	7
Col-0	+5LD	1	892	47.3597	7
Col-0	+5LD	1	914	31.3864	7
Col-0	+5LD	1	927	66.7129	7
Col-0	+5LD	1	928	44.1674	7
Col-0	+5LD	1	974	57.6652	7
Col-0	+5LD	1	976	63.6806	7
Col-0	+5LD	1	981	31.859	7
Col-0	+5LD	1	11	71.899	8
Col-0	+5LD	1	62	47.1249	8
Col-0	+5LD	1	76	53.0954	8
Col-0	+5LD	1	94	36.5631	8
Col-0	+5LD	1	121	71.6974	8
Col-0	+5LD	1	130	62.0863	8
Col-0	+5LD	1	136	61.7771	8
Col-0	+5LD	1	192	61.0169	8
Col-0	+5LD	1	198	39.8006	8
Col-0	+5LD	1	211	39.4944	8
Col-0	+5LD	1	300	67.8739	8
Col-0	+5LD	1	303	41.1119	8
Col-0	+5LD	1	318	42.5661	8
Col-0	+5LD	1	336	50.3406	8
Col-0	+5LD	1	339	53.6958	8
Col-0	+5LD	1	352	79.1886	8
Col-0	+5LD	1	372	59.9905	8
Col-0	+5LD	1	405	59.3947	8
Col-0	+5LD	1	409	65.7143	8
Col-0	+5LD	1	495	74.7335	8
Col-0	+5LD	1	505	48.7221	8
Col-0	+5LD	1	511	89.4419	8
Col-0	+5LD	1	528	40.2802	8
Col-0	+5LD	1	530	73.9691	8
Col-0	+5LD	1	533	62.5704	8
Col-0	+5LD	1	554	52.6578	8
Col-0	+5LD	1	565	56.2181	8
Col-0	+5LD	1	577	60.5033	8
Col-0	+5LD	1	581	23.894	8
Col-0	+5LD	1	594	31.1534	8
Col-0	+5LD	1	617	57.0606	8
Col-0	+5LD	1	622	84.3879	8
Col-0	+5LD	1	649	69.7153	8
Col-0	+5LD	1	680	68.6488	8
Col-0	+5LD	1	681	68.3619	8
Col-0	+5LD	1	737	82.1403	8
Col-0	+5LD	1	752	48.0069	8
Col-0	+5LD	1	784	42.6338	8
Col-0	+5LD	1	896	53.5791	8
Col-0	+5LD	1	904	32.837	8
Col-0	+5LD	1	971	80.6825	8
Col-0	+5LD	1	29	51.5437	9
Col-0	+5LD	1	30	43.1744	9
Col-0	+5LD	1	46	53.8576	9
Col-0	+5LD	1	52	48.1105	9
Col-0	+5LD	1	67	46.0996	9
Col-0	+5LD	1	71	54.175	9
Col-0	+5LD	1	108	46.683	9
Col-0	+5LD	1	116	65.1166	9
Col-0	+5LD	1	158	29.2784	9
Col-0	+5LD	1	316	43.6523	9
Col-0	+5LD	1	319	62.5519	9
Col-0	+5LD	1	396	40.5341	9
Col-0	+5LD	1	401	43.0839	9
Col-0	+5LD	1	455	46.9162	9
Col-0	+5LD	1	477	58.2043	9
Col-0	+5LD	1	487	56.6328	9
Col-0	+5LD	1	488	57.1533	9
Col-0	+5LD	1	489	62.8409	9
Col-0	+5LD	1	494	32.262	9
Col-0	+5LD	1	496	27.7167	9
Col-0	+5LD	1	513	61.2398	9
Col-0	+5LD	1	520	61.1415	9
Col-0	+5LD	1	527	35.4595	9
Col-0	+5LD	1	536	48.3422	9
Col-0	+5LD	1	539	60.7101	9
Col-0	+5LD	1	555	65.3282	9
Col-0	+5LD	1	564	28.4531	9
Col-0	+5LD	1	576	67.9435	9
Col-0	+5LD	1	589	44.9903	9
Col-0	+5LD	1	592	42.4023	9
Col-0	+5LD	1	608	76.8538	9
Col-0	+5LD	1	634	54.0465	9
Col-0	+5LD	1	635	58.7008	9
Col-0	+5LD	1	655	35.8199	9
Col-0	+5LD	1	664	57.0353	9
Col-0	+5LD	1	670	60.7139	9
Col-0	+5LD	1	674	65.098	9
Col-0	+5LD	1	710	71.9111	9
Col-0	+5LD	1	716	63.4848	9
Col-0	+5LD	1	724	48.181	9
Col-0	+5LD	1	783	34.4133	9
Col-0	+5LD	1	791	49.3148	9
Col-0	+5LD	1	812	43.247	9
Col-0	+5LD	1	863	50.121	9
Col-0	+5LD	1	891	76.5388	9
Col-0	+5LD	1	936	38.4058	9
Col-0	+5LD	1	941	47.3094	9
Col-0	+5LD	1	982	50.7973	9
Col-0	+5LD	1	1072	65.9116	9
Col-0	+5LD	1	26	42.8676	10
Col-0	+5LD	1	103	58.3956	10
Col-0	+5LD	1	107	50.1344	10
Col-0	+5LD	1	117	63.1058	10
Col-0	+5LD	1	178	44.6116	10
Col-0	+5LD	1	184	45.3801	10
Col-0	+5LD	1	185	25.7583	10
Col-0	+5LD	1	212	62.8407	10
Col-0	+5LD	1	228	51.9499	10
Col-0	+5LD	1	255	35.342	10
Col-0	+5LD	1	296	51.8141	10
Col-0	+5LD	1	298	74.4064	10
Col-0	+5LD	1	305	62.68	10
Col-0	+5LD	1	326	33.2787	10
Col-0	+5LD	1	356	67.4082	10
Col-0	+5LD	1	371	64.502	10
Col-0	+5LD	1	395	59.4395	10
Col-0	+5LD	1	403	18.3316	10
Col-0	+5LD	1	412	63.4632	10
Col-0	+5LD	1	476	70.8253	10
Col-0	+5LD	1	521	47.9648	10
Col-0	+5LD	1	523	47.336	10
Col-0	+5LD	1	548	35.5898	10
Col-0	+5LD	1	600	54.2178	10
Col-0	+5LD	1	626	52.8759	10
Col-0	+5LD	1	628	45.0935	10
Col-0	+5LD	1	631	48.1794	10
Col-0	+5LD	1	637	44.2186	10
Col-0	+5LD	1	641	65.5241	10
Col-0	+5LD	1	661	75.6557	10
Col-0	+5LD	1	663	34.4843	10
Col-0	+5LD	1	682	60.3456	10
Col-0	+5LD	1	694	51.2944	10
Col-0	+5LD	1	717	31.9959	10
Col-0	+5LD	1	735	43.6602	10
Col-0	+5LD	1	805	61.2398	10
Col-0	+5LD	1	852	51.0102	10
Col-0	+5LD	1	924	57.7694	10
Col-0	+5LD	1	929	58.7378	10
Col-0	+5LD	1	983	49.5242	10
Col-0	+5LD	1	1071	36.4463	10
Col-0	+5LD	1	1105	39.4163	10
Col-0	+5LD	1	1106	54.6274	10
Col-0	+5LD	1	16	69.7862	11
Col-0	+5LD	1	21	53.0267	11
Col-0	+5LD	1	104	35.1171	11
Col-0	+5LD	1	111	36.9931	11
Col-0	+5LD	1	157	74.2785	11
Col-0	+5LD	1	176	56.5596	11
Col-0	+5LD	1	195	45.7082	11
Col-0	+5LD	1	270	83.4177	11
Col-0	+5LD	1	272	53.9521	11
Col-0	+5LD	1	315	30.5289	11
Col-0	+5LD	1	343	56.1592	11
Col-0	+5LD	1	355	48.4826	11
Col-0	+5LD	1	389	38.3018	11
Col-0	+5LD	1	406	54.7181	11
Col-0	+5LD	1	411	63.7358	11
Col-0	+5LD	1	467	50.0279	11
Col-0	+5LD	1	480	61.8942	11
Col-0	+5LD	1	497	29.6912	11
Col-0	+5LD	1	514	38.3254	11
Col-0	+5LD	1	519	41.7853	11
Col-0	+5LD	1	538	37.7678	11
Col-0	+5LD	1	586	52.8586	11
Col-0	+5LD	1	602	54.887	11
Col-0	+5LD	1	639	61.8113	11
Col-0	+5LD	1	696	44.5322	11
Col-0	+5LD	1	709	42.1391	11
Col-0	+5LD	1	720	54.4524	11
Col-0	+5LD	1	727	28.2153	11
Col-0	+5LD	1	817	80.0677	11
Col-0	+5LD	1	824	49.6555	11
Col-0	+5LD	1	879	34.2759	11
Col-0	+5LD	1	1065	66.2963	11
Col-0	+5LD	1	187	38.6943	12
Col-0	+5LD	1	293	34.0478	12
Col-0	+5LD	1	312	33.51	12
Col-0	+5LD	1	320	50.2817	12
Col-0	+5LD	1	328	53.2547	12
Col-0	+5LD	1	331	70.2142	12
Col-0	+5LD	1	481	52.6625	12
Col-0	+5LD	1	498	60.4211	12
Col-0	+5LD	1	508	53.1834	12
Col-0	+5LD	1	524	72.3247	12
Col-0	+5LD	1	593	54.0464	12
Col-0	+5LD	1	687	41.1064	12
Col-0	+5LD	1	732	36.5229	12
Col-0	+5LD	1	776	68.8316	12
Col-0	+5LD	1	797	55.8023	12
Col-0	+5LD	1	807	38.953	12
Col-0	+5LD	1	1042	60.5141	12
Col-0	+5LD	1	1061	71.1747	12
Col-0	+5LD	1	23	41.5072	13
Col-0	+5LD	1	25	46.6233	13
Col-0	+5LD	1	27	38.0982	13
Col-0	+5LD	1	329	43.1872	13
Col-0	+5LD	1	640	61.883	13
Col-0	+5LD	1	734	43.7719	13
Col-0	+5LD	1	779	42.5894	13
Col-0	+5LD	1	840	52.7958	13
Col-0	+5LD	2	1461	29.6556	0
Col-0	+5LD	2	2058	39.9479	1
Col-0	+5LD	2	2059	44.9733	1
Col-0	+5LD	2	2110	45.0642	1
Col-0	+5LD	2	2161	37.2098	1
Col-0	+5LD	2	2634	47.5219	1
Col-0	+5LD	2	2635	51.8215	1
Col-0	+5LD	2	1293	54.2637	2
Col-0	+5LD	2	1435	51.9791	2
Col-0	+5LD	2	1494	33.3498	2
Col-0	+5LD	2	2020	32.0909	2
Col-0	+5LD	2	2021	79.5791	2
Col-0	+5LD	2	2145	52.5116	2
Col-0	+5LD	2	2191	40.3663	2
Col-0	+5LD	2	2238	38.9935	2
Col-0	+5LD	2	2503	44.491	2
Col-0	+5LD	2	2631	60.0273	2
Col-0	+5LD	2	2632	55.391	2
Col-0	+5LD	2	2643	66.2165	2
Col-0	+5LD	2	1952	68.8002	3
Col-0	+5LD	2	1971	55.7132	3
Col-0	+5LD	2	1989	41.0395	3
Col-0	+5LD	2	2035	48.9855	3
Col-0	+5LD	2	2038	31.6748	3
Col-0	+5LD	2	2061	50.1173	3
Col-0	+5LD	2	2205	52.0178	3
Col-0	+5LD	2	2239	43.9897	3
Col-0	+5LD	2	2504	58.0458	3
Col-0	+5LD	2	2517	77.46	3
Col-0	+5LD	2	2518	69.1897	3
Col-0	+5LD	2	2593	50.6532	3
Col-0	+5LD	2	2633	54.518	3
Col-0	+5LD	2	2636	49.7182	3
Col-0	+5LD	2	2642	73.6063	3
Col-0	+5LD	2	2707	42.6724	3
Col-0	+5LD	2	2709	62.6661	3
Col-0	+5LD	2	1282	57.743	4
Col-0	+5LD	2	1283	52.097	4
Col-0	+5LD	2	1291	71.5574	4
Col-0	+5LD	2	1413	41.3643	4
Col-0	+5LD	2	1421	41.69	4
Col-0	+5LD	2	1512	36.1052	4
Col-0	+5LD	2	1912	55.0972	4
Col-0	+5LD	2	1928	67.207	4
Col-0	+5LD	2	1988	69.9573	4
Col-0	+5LD	2	1990	61.2967	4
Col-0	+5LD	2	2112	48.6274	4
Col-0	+5LD	2	2206	45.2807	4
Col-0	+5LD	2	2222	50.5364	4
Col-0	+5LD	2	2337	62.1446	4
Col-0	+5LD	2	2338	39.1849	4
Col-0	+5LD	2	2495	79.9865	4
Col-0	+5LD	2	2497	45.3701	4
Col-0	+5LD	2	2502	66.518	4
Col-0	+5LD	2	2505	63.6455	4
Col-0	+5LD	2	2507	38.9596	4
Col-0	+5LD	2	2512	61.97	4
Col-0	+5LD	2	2519	25.2556	4
Col-0	+5LD	2	2520	57.9272	4
Col-0	+5LD	2	2594	49.3235	4
Col-0	+5LD	2	1287	66.2649	5
Col-0	+5LD	2	1312	26.4102	5
Col-0	+5LD	2	1424	37.1967	5
Col-0	+5LD	2	1471	50.8497	5
Col-0	+5LD	2	1511	69.3535	5
Col-0	+5LD	2	1838	59.4848	5
Col-0	+5LD	2	1850	36.7135	5
Col-0	+5LD	2	1851	34.4016	5
Col-0	+5LD	2	1853	48.5972	5
Col-0	+5LD	2	1854	71.0386	5
Col-0	+5LD	2	1892	45.5512	5
Col-0	+5LD	2	1910	60.4621	5
Col-0	+5LD	2	1969	65.7074	5
Col-0	+5LD	2	2008	62.1197	5
Col-0	+5LD	2	2039	60.5331	5
Col-0	+5LD	2	2057	73.5314	5
Col-0	+5LD	2	2105	62.8064	5
Col-0	+5LD	2	2164	30.6473	5
Col-0	+5LD	2	2321	62.962	5
Col-0	+5LD	2	2322	46.7174	5
Col-0	+5LD	2	2373	46.5813	5
Col-0	+5LD	2	2396	32.3759	5
Col-0	+5LD	2	2413	39.3957	5
Col-0	+5LD	2	2496	29.2717	5
Col-0	+5LD	2	2500	75.6012	5
Col-0	+5LD	2	2513	53.5458	5
Col-0	+5LD	2	2516	67.2739	5
Col-0	+5LD	2	2589	69.3588	5
Col-0	+5LD	2	2592	70.4564	5
Col-0	+5LD	2	2595	34.4609	5
Col-0	+5LD	2	2706	78.4269	5
Col-0	+5LD	2	2708	90.9681	5
Col-0	+5LD	2	1279	18.7104	6
Col-0	+5LD	2	1285	38.0326	6
Col-0	+5LD	2	1289	68.8211	6
Col-0	+5LD	2	1319	57.9104	6
Col-0	+5LD	2	1426	39.0607	6
Col-0	+5LD	2	1562	56.3986	6
Col-0	+5LD	2	1595	45.6382	6
Col-0	+5LD	2	1602	58.7805	6
Col-0	+5LD	2	1806	49.8767	6
Col-0	+5LD	2	1807	73.599	6
Col-0	+5LD	2	1814	75.5977	6
Col-0	+5LD	2	1826	44.1402	6
Col-0	+5LD	2	1834	65.1939	6
Col-0	+5LD	2	1856	35.2933	6
Col-0	+5LD	2	1891	62.246	6
Col-0	+5LD	2	1893	30.7387	6
Col-0	+5LD	2	1932	47.0049	6
Col-0	+5LD	2	1934	57.295	6
Col-0	+5LD	2	1976	55.2169	6
Col-0	+5LD	2	2009	60.3716	6
Col-0	+5LD	2	2070	57.8849	6
Col-0	+5LD	2	2135	52.7578	6
Col-0	+5LD	2	2165	33.2848	6
Col-0	+5LD	2	2312	30.1277	6
Col-0	+5LD	2	2336	25.5117	6
Col-0	+5LD	2	2412	33.1864	6
Col-0	+5LD	2	2427	38.0778	6
Col-0	+5LD	2	2443	52.7714	6
Col-0	+5LD	2	2444	49.2671	6
Col-0	+5LD	2	2445	43.3857	6
Col-0	+5LD	2	2498	32.4685	6
Col-0	+5LD	2	2499	38.391	6
Col-0	+5LD	2	2501	60.8409	6
Col-0	+5LD	2	2509	37.8154	6
Col-0	+5LD	2	2514	67.7932	6
Col-0	+5LD	2	2515	77.159	6
Col-0	+5LD	2	2583	70.1281	6
Col-0	+5LD	2	2584	44.4676	6
Col-0	+5LD	2	2586	68.9189	6
Col-0	+5LD	2	2588	38.4853	6
Col-0	+5LD	2	2596	46.6677	6
Col-0	+5LD	2	1324	35.9292	7
Col-0	+5LD	2	1396	63.5594	7
Col-0	+5LD	2	1401	38.4352	7
Col-0	+5LD	2	1455	48.2484	7
Col-0	+5LD	2	1484	73.2213	7
Col-0	+5LD	2	1500	38.3266	7
Col-0	+5LD	2	1509	48.301	7
Col-0	+5LD	2	1563	34.2935	7
Col-0	+5LD	2	1596	31.9704	7
Col-0	+5LD	2	1601	43.2409	7
Col-0	+5LD	2	1758	52.2787	7
Col-0	+5LD	2	1775	60.9223	7
Col-0	+5LD	2	1786	43.052	7
Col-0	+5LD	2	1802	55.0368	7
Col-0	+5LD	2	1803	38.6653	7
Col-0	+5LD	2	1805	47.5007	7
Col-0	+5LD	2	1808	54.5783	7
Col-0	+5LD	2	1857	20.8571	7
Col-0	+5LD	2	1874	52.0554	7
Col-0	+5LD	2	1914	61.6766	7
Col-0	+5LD	2	1949	47.1498	7
Col-0	+5LD	2	1970	28.12	7
Col-0	+5LD	2	1974	57.8449	7
Col-0	+5LD	2	1977	33.96	7
Col-0	+5LD	2	2001	75.2778	7
Col-0	+5LD	2	2040	83.5134	7
Col-0	+5LD	2	2203	49.6528	7
Col-0	+5LD	2	2224	46.5297	7
Col-0	+5LD	2	2315	59.2288	7
Col-0	+5LD	2	2356	49.2199	7
Col-0	+5LD	2	2375	59.1864	7
Col-0	+5LD	2	2428	65.7306	7
Col-0	+5LD	2	2473	45.3808	7
Col-0	+5LD	2	2474	43.0857	7
Col-0	+5LD	2	2475	52.4232	7
Col-0	+5LD	2	2489	64.4571	7
Col-0	+5LD	2	2491	42.9786	7
Col-0	+5LD	2	2508	59.9603	7
Col-0	+5LD	2	2510	37.7337	7
Col-0	+5LD	2	2581	43.1473	7
Col-0	+5LD	2	2585	58.4267	7
Col-0	+5LD	2	2637	65.4306	7
Col-0	+5LD	2	2695	69.5394	7
Col-0	+5LD	2	2696	77.3749	7
Col-0	+5LD	2	1256	54.7835	8
Col-0	+5LD	2	1280	26.991	8
Col-0	+5LD	2	1329	55.1959	8
Col-0	+5LD	2	1373	75.439	8
Col-0	+5LD	2	1422	38.9033	8
Col-0	+5LD	2	1462	44.9073	8
Col-0	+5LD	2	1463	57.5976	8
Col-0	+5LD	2	1508	54.9662	8
Col-0	+5LD	2	1548	35.4779	8
Col-0	+5LD	2	1554	43.8811	8
Col-0	+5LD	2	1622	39.4752	8
Col-0	+5LD	2	1629	49.9754	8
Col-0	+5LD	2	1746	46.2051	8
Col-0	+5LD	2	1756	43.2747	8
Col-0	+5LD	2	1770	40.4188	8
Col-0	+5LD	2	1771	55.688	8
Col-0	+5LD	2	1776	60.2193	8
Col-0	+5LD	2	1784	38.6535	8
Col-0	+5LD	2	1801	56.1573	8
Col-0	+5LD	2	1816	56.4082	8
Col-0	+5LD	2	1825	64.8254	8
Col-0	+5LD	2	1827	58.4753	8
Col-0	+5LD	2	1873	63.8337	8
Col-0	+5LD	2	1877	53.3221	8
Col-0	+5LD	2	1908	55.324	8
Col-0	+5LD	2	1915	69.6133	8
Col-0	+5LD	2	1927	50.8283	8
Col-0	+5LD	2	1963	33.4083	8
Col-0	+5LD	2	1991	44.9048	8
Col-0	+5LD	2	2000	54.0032	8
Col-0	+5LD	2	2041	49.5104	8
Col-0	+5LD	2	2055	44.1607	8
Col-0	+5LD	2	2072	35.6495	8
Col-0	+5LD	2	2175	77.0643	8
Col-0	+5LD	2	2221	65.8435	8
Col-0	+5LD	2	2244	71.9286	8
Col-0	+5LD	2	2285	55.0945	8
Col-0	+5LD	2	2335	55.3105	8
Col-0	+5LD	2	2411	31.3476	8
Col-0	+5LD	2	2429	52.8766	8
Col-0	+5LD	2	2435	40.1127	8
Col-0	+5LD	2	2453	43.2085	8
Col-0	+5LD	2	2472	44.3554	8
Col-0	+5LD	2	2487	67.3137	8
Col-0	+5LD	2	2511	32.7752	8
Col-0	+5LD	2	2582	74.2081	8
Col-0	+5LD	2	2587	46.1234	8
Col-0	+5LD	2	2614	71.5774	8
Col-0	+5LD	2	2694	54.594	8
Col-0	+5LD	2	2697	76.61	8
Col-0	+5LD	2	1317	49.7512	9
Col-0	+5LD	2	1328	63.3941	9
Col-0	+5LD	2	1359	87.5433	9
Col-0	+5LD	2	1360	58.8533	9
Col-0	+5LD	2	1365	55.9518	9
Col-0	+5LD	2	1369	49.3104	9
Col-0	+5LD	2	1371	44.3417	9
Col-0	+5LD	2	1380	50.6029	9
Col-0	+5LD	2	1403	35.5729	9
Col-0	+5LD	2	1476	57.8874	9
Col-0	+5LD	2	1507	32.9164	9
Col-0	+5LD	2	1525	58.1625	9
Col-0	+5LD	2	1576	37.7837	9
Col-0	+5LD	2	1579	38.8057	9
Col-0	+5LD	2	1625	45.6234	9
Col-0	+5LD	2	1684	39.7585	9
Col-0	+5LD	2	1687	42.8779	9
Col-0	+5LD	2	1693	39.6298	9
Col-0	+5LD	2	1696	54.4904	9
Col-0	+5LD	2	1700	64.3094	9
Col-0	+5LD	2	1734	36.584	9
Col-0	+5LD	2	1736	57.8386	9
Col-0	+5LD	2	1745	47.0089	9
Col-0	+5LD	2	1765	39.755	9
Col-0	+5LD	2	1769	45.5486	9
Col-0	+5LD	2	1788	38.176	9
Col-0	+5LD	2	1809	44.3115	9
Col-0	+5LD	2	1813	50.0829	9
Col-0	+5LD	2	1828	58.9335	9
Col-0	+5LD	2	1833	71.217	9
Col-0	+5LD	2	1839	48.159	9
Col-0	+5LD	2	1872	61.5549	9
Col-0	+5LD	2	2073	50.3636	9
Col-0	+5LD	2	2093	34.9414	9
Col-0	+5LD	2	2115	36.8361	9
Col-0	+5LD	2	2225	48.5833	9
Col-0	+5LD	2	2278	63.3229	9
Col-0	+5LD	2	2369	25.841	9
Col-0	+5LD	2	2377	32.9246	9
Col-0	+5LD	2	2430	44.7891	9
Col-0	+5LD	2	2459	46.6318	9
Col-0	+5LD	2	2477	59.0035	9
Col-0	+5LD	2	2527	67.2039	9
Col-0	+5LD	2	2590	35.3193	9
Col-0	+5LD	2	2591	41.1517	9
Col-0	+5LD	2	2611	88.4492	9
Col-0	+5LD	2	1254	31.0035	10
Col-0	+5LD	2	1262	66.978	10
Col-0	+5LD	2	1268	65.8148	10
Col-0	+5LD	2	1349	26.4216	10
Col-0	+5LD	2	1353	58.5852	10
Col-0	+5LD	2	1356	54.8201	10
Col-0	+5LD	2	1358	50.0173	10
Col-0	+5LD	2	1364	48.8773	10
Col-0	+5LD	2	1374	33.9965	10
Col-0	+5LD	2	1383	42.2068	10
Col-0	+5LD	2	1384	41.9055	10
Col-0	+5LD	2	1391	72.2327	10
Col-0	+5LD	2	1392	58.822	10
Col-0	+5LD	2	1394	36.4161	10
Col-0	+5LD	2	1514	52.1947	10
Col-0	+5LD	2	1556	65.2828	10
Col-0	+5LD	2	1707	75.2264	10
Col-0	+5LD	2	1732	42.325	10
Col-0	+5LD	2	1733	43.2495	10
Col-0	+5LD	2	1751	51.2324	10
Col-0	+5LD	2	1755	51.7488	10
Col-0	+5LD	2	1757	52.3529	10
Col-0	+5LD	2	1761	35.2641	10
Col-0	+5LD	2	1789	47.6305	10
Col-0	+5LD	2	1810	63.4951	10
Col-0	+5LD	2	1815	45.4884	10
Col-0	+5LD	2	1820	55.9996	10
Col-0	+5LD	2	1852	42.0334	10
Col-0	+5LD	2	1855	64.2815	10
Col-0	+5LD	2	1890	38.9856	10
Col-0	+5LD	2	1894	53.209	10
Col-0	+5LD	2	1901	48.7318	10
Col-0	+5LD	2	1944	38.8017	10
Col-0	+5LD	2	2177	67.4944	10
Col-0	+5LD	2	2210	36.4431	10
Col-0	+5LD	2	2245	66.4369	10
Col-0	+5LD	2	2328	53.7931	10
Col-0	+5LD	2	2378	43.4104	10
Col-0	+5LD	2	2415	61.1185	10
Col-0	+5LD	2	2478	74.9159	10
Col-0	+5LD	2	2612	49.5124	10
Col-0	+5LD	2	2613	64.8256	10
Col-0	+5LD	2	2615	106.273	10
Col-0	+5LD	2	1370	59.9095	11
Col-0	+5LD	2	1427	35.5156	11
Col-0	+5LD	2	1499	46.2428	11
Col-0	+5LD	2	1555	67.0909	11
Col-0	+5LD	2	1590	46.61	11
Col-0	+5LD	2	1592	42.9553	11
Col-0	+5LD	2	1633	47.8924	11
Col-0	+5LD	2	1682	36.0809	11
Col-0	+5LD	2	1720	64.5822	11
Col-0	+5LD	2	1722	48.9777	11
Col-0	+5LD	2	1832	30.7399	11
Col-0	+5LD	2	1868	84.5945	11
Col-0	+5LD	2	1889	46.7348	11
Col-0	+5LD	2	1896	43.3106	11
Col-0	+5LD	2	1899	21.5875	11
Col-0	+5LD	2	1903	38.2519	11
Col-0	+5LD	2	1941	34.6262	11
Col-0	+5LD	2	1950	43.4859	11
Col-0	+5LD	2	1953	56.9682	11
Col-0	+5LD	2	2032	36.0546	11
Col-0	+5LD	2	2178	35.7572	11
Col-0	+5LD	2	2279	55.6952	11
Col-0	+5LD	2	2295	47.0472	11
Col-0	+5LD	2	2330	38.194	11
Col-0	+5LD	2	2416	43.5308	11
Col-0	+5LD	2	2447	56.319	11
Col-0	+5LD	2	2494	28.2687	11
Col-0	+5LD	2	2710	65.2493	11
Col-0	+5LD	2	1264	38.1461	12
Col-0	+5LD	2	1281	32.0611	12
Col-0	+5LD	2	1320	85.0016	12
Col-0	+5LD	2	1355	60.0431	12
Col-0	+5LD	2	1389	28.8644	12
Col-0	+5LD	2	1444	23.5089	12
Col-0	+5LD	2	1526	50.4132	12
Col-0	+5LD	2	1589	47.0634	12
Col-0	+5LD	2	1606	57.1349	12
Col-0	+5LD	2	1617	76.8726	12
Col-0	+5LD	2	1702	41.5321	12
Col-0	+5LD	2	1704	40.5731	12
Col-0	+5LD	2	1730	56.2749	12
Col-0	+5LD	2	1768	62.5731	12
Col-0	+5LD	2	1782	57.0072	12
Col-0	+5LD	2	2067	35.1082	12
Col-0	+5LD	2	2179	37.5413	12
Col-0	+5LD	2	2226	30.0501	12
Col-0	+5LD	2	2280	69.7506	12
Col-0	+5LD	2	2379	54.394	12
Col-0	+5LD	2	1357	55.3924	13
Col-0	+5LD	2	1767	81.4763	13
Col-0	+5LD	2	1798	73.1626	13
Col-0	+5LD	2	1831	49.2917	13
Col-0	+5LD	2	2195	39.3142	13
Col-0	+5LD	2	2227	69.276	13
Col-0	+5LD	2	2360	43.96	13
Col-0	+5LD	2	2418	43.8167	13
Col-0	+5LD	2	2716	58.8726	13
Col-0	+5LD	2	1368	79.7321	14
Col-0	+5LD	2	1588	39.9545	14
Col-0	+5LD	2	2211	29.937	14
Col-0	+5LD	2	2261	78.4359	14
Col-0	+5LD	2	2380	44.5768	14
Col-0	+5LD	2	2399	49.1405	14
Col-0	+5LD	2	2450	40.8962	14
Col-0	+5LD	2	2717	52.8417	14
Col-0	+5LD	2	2718	45.7014	14
Col-0	+5LD	3	50	29.6891	0
Col-0	+5LD	3	52	44.0135	1
Col-0	+5LD	3	720	42.6707	1
Col-0	+5LD	3	757	27.1797	1
Col-0	+5LD	3	2732	68.5864	1
Col-0	+5LD	3	2734	59.1653	1
Col-0	+5LD	3	15	39.8285	2
Col-0	+5LD	3	45	43.4457	2
Col-0	+5LD	3	644	52.365	2
Col-0	+5LD	3	695	29.9132	2
Col-0	+5LD	3	769	44.0659	2
Col-0	+5LD	3	782	47.7069	2
Col-0	+5LD	3	823	49.9481	2
Col-0	+5LD	3	982	42.6477	2
Col-0	+5LD	3	986	16.3319	2
Col-0	+5LD	3	987	64.2198	2
Col-0	+5LD	3	999	63.6648	2
Col-0	+5LD	3	1001	68.0794	2
Col-0	+5LD	3	2733	50.2539	2
Col-0	+5LD	3	42	55.5873	3
Col-0	+5LD	3	158	53.4935	3
Col-0	+5LD	3	164	52.4486	3
Col-0	+5LD	3	184	36.1234	3
Col-0	+5LD	3	604	77.7735	3
Col-0	+5LD	3	710	58.4332	3
Col-0	+5LD	3	737	32.3402	3
Col-0	+5LD	3	853	37.2203	3
Col-0	+5LD	3	868	63.2972	3
Col-0	+5LD	3	881	49.1474	3
Col-0	+5LD	3	891	80.2422	3
Col-0	+5LD	3	976	33.7548	3
Col-0	+5LD	3	977	37.4124	3
Col-0	+5LD	3	978	51.9336	3
Col-0	+5LD	3	981	66.2947	3
Col-0	+5LD	3	988	47.9489	3
Col-0	+5LD	3	990	49.7153	3
Col-0	+5LD	3	1003	53.375	3
Col-0	+5LD	3	2730	68.5051	3
Col-0	+5LD	3	2731	68.9393	3
Col-0	+5LD	3	2737	80.1551	3
Col-0	+5LD	3	163	43.0908	4
Col-0	+5LD	3	185	69.2946	4
Col-0	+5LD	3	222	19.4289	4
Col-0	+5LD	3	410	67.0668	4
Col-0	+5LD	3	412	70.0503	4
Col-0	+5LD	3	588	62.0186	4
Col-0	+5LD	3	619	55.7387	4
Col-0	+5LD	3	631	47.17	4
Col-0	+5LD	3	659	80.3839	4
Col-0	+5LD	3	855	69.9289	4
Col-0	+5LD	3	890	27.45	4
Col-0	+5LD	3	901	53.5044	4
Col-0	+5LD	3	912	59.542	4
Col-0	+5LD	3	927	60.0415	4
Col-0	+5LD	3	984	44.9576	4
Col-0	+5LD	3	985	71.9118	4
Col-0	+5LD	3	989	38.253	4
Col-0	+5LD	3	992	27.9624	4
Col-0	+5LD	3	996	83.9664	4
Col-0	+5LD	3	1000	64.4808	4
Col-0	+5LD	3	1004	70.9362	4
Col-0	+5LD	3	2735	65.6429	4
Col-0	+5LD	3	2736	68.4442	4
Col-0	+5LD	3	2738	70.2806	4
Col-0	+5LD	3	92	61.6199	5
Col-0	+5LD	3	101	41.7744	5
Col-0	+5LD	3	138	80.6412	5
Col-0	+5LD	3	139	70.8555	5
Col-0	+5LD	3	140	38.8873	5
Col-0	+5LD	3	176	57.3383	5
Col-0	+5LD	3	218	51.8455	5
Col-0	+5LD	3	232	36.9028	5
Col-0	+5LD	3	241	58.7525	5
Col-0	+5LD	3	243	51.4809	5
Col-0	+5LD	3	245	37.4499	5
Col-0	+5LD	3	387	57.7673	5
Col-0	+5LD	3	409	34.8101	5
Col-0	+5LD	3	598	62.553	5
Col-0	+5LD	3	605	46.1167	5
Col-0	+5LD	3	630	47.7545	5
Col-0	+5LD	3	646	54.7763	5
Col-0	+5LD	3	733	60.1476	5
Col-0	+5LD	3	745	34.1846	5
Col-0	+5LD	3	821	52.5827	5
Col-0	+5LD	3	879	56.377	5
Col-0	+5LD	3	893	52.1796	5
Col-0	+5LD	3	900	44.5285	5
Col-0	+5LD	3	915	50.972	5
Col-0	+5LD	3	954	31.4572	5
Col-0	+5LD	3	966	64.8299	5
Col-0	+5LD	3	967	56.5379	5
Col-0	+5LD	3	974	75.4847	5
Col-0	+5LD	3	979	68.4419	5
Col-0	+5LD	3	983	57.1791	5
Col-0	+5LD	3	993	49.5324	5
Col-0	+5LD	3	997	66.2466	5
Col-0	+5LD	3	998	38.743	5
Col-0	+5LD	3	41	55.2769	6
Col-0	+5LD	3	88	59.2346	6
Col-0	+5LD	3	95	37.9255	6
Col-0	+5LD	3	135	33.349	6
Col-0	+5LD	3	207	76.6496	6
Col-0	+5LD	3	269	39.693	6
Col-0	+5LD	3	270	32.3166	6
Col-0	+5LD	3	272	48.3326	6
Col-0	+5LD	3	361	73.1995	6
Col-0	+5LD	3	375	58.1634	6
Col-0	+5LD	3	389	47.5312	6
Col-0	+5LD	3	464	65.7829	6
Col-0	+5LD	3	465	47.1377	6
Col-0	+5LD	3	482	39.7458	6
Col-0	+5LD	3	552	67.5509	6
Col-0	+5LD	3	567	63.3591	6
Col-0	+5LD	3	599	40.4052	6
Col-0	+5LD	3	616	62.9814	6
Col-0	+5LD	3	654	63.596	6
Col-0	+5LD	3	670	70.8468	6
Col-0	+5LD	3	691	62.2415	6
Col-0	+5LD	3	722	88.9567	6
Col-0	+5LD	3	731	63.249	6
Col-0	+5LD	3	767	43.067	6
Col-0	+5LD	3	793	36.2525	6
Col-0	+5LD	3	833	41.9469	6
Col-0	+5LD	3	849	38.034	6
Col-0	+5LD	3	888	71.5766	6
Col-0	+5LD	3	894	73.2979	6
Col-0	+5LD	3	908	46.1694	6
Col-0	+5LD	3	931	48.3303	6
Col-0	+5LD	3	941	49.1846	6
Col-0	+5LD	3	955	43.7064	6
Col-0	+5LD	3	973	60.2987	6
Col-0	+5LD	3	980	62.259	6
Col-0	+5LD	3	2739	56.8068	6
Col-0	+5LD	3	20	59.5125	7
Col-0	+5LD	3	56	68.8271	7
Col-0	+5LD	3	74	55.6638	7
Col-0	+5LD	3	94	38.2096	7
Col-0	+5LD	3	131	33.7116	7
Col-0	+5LD	3	132	75.4088	7
Col-0	+5LD	3	149	54.4573	7
Col-0	+5LD	3	166	43.2616	7
Col-0	+5LD	3	186	70.8291	7
Col-0	+5LD	3	200	58.8635	7
Col-0	+5LD	3	202	51.9546	7
Col-0	+5LD	3	266	28.5231	7
Col-0	+5LD	3	331	44.446	7
Col-0	+5LD	3	343	66.394	7
Col-0	+5LD	3	345	69.0406	7
Col-0	+5LD	3	353	33.2305	7
Col-0	+5LD	3	354	61.2139	7
Col-0	+5LD	3	362	59.6018	7
Col-0	+5LD	3	364	78.0407	7
Col-0	+5LD	3	386	49.0723	7
Col-0	+5LD	3	390	53.1256	7
Col-0	+5LD	3	431	54.8452	7
Col-0	+5LD	3	451	47.7208	7
Col-0	+5LD	3	508	36.163	7
Col-0	+5LD	3	534	46.0441	7
Col-0	+5LD	3	548	47.1469	7
Col-0	+5LD	3	551	28.7611	7
Col-0	+5LD	3	573	27.8631	7
Col-0	+5LD	3	595	42.3832	7
Col-0	+5LD	3	615	63.077	7
Col-0	+5LD	3	668	50.5653	7
Col-0	+5LD	3	685	65.7202	7
Col-0	+5LD	3	718	62.4189	7
Col-0	+5LD	3	916	53.2227	7
Col-0	+5LD	3	939	46.4235	7
Col-0	+5LD	3	940	39.1647	7
Col-0	+5LD	3	963	55.8407	7
Col-0	+5LD	3	968	77.4645	7
Col-0	+5LD	3	1002	68.0327	7
Col-0	+5LD	3	2729	74.8546	7
Col-0	+5LD	3	2740	37.5124	7
Col-0	+5LD	3	6	63.2114	8
Col-0	+5LD	3	9	74.1873	8
Col-0	+5LD	3	35	55.8101	8
Col-0	+5LD	3	40	37.4833	8
Col-0	+5LD	3	60	44.0925	8
Col-0	+5LD	3	68	47.9158	8
Col-0	+5LD	3	78	47.8897	8
Col-0	+5LD	3	100	41.0832	8
Col-0	+5LD	3	145	64.1026	8
Col-0	+5LD	3	146	35.4007	8
Col-0	+5LD	3	148	69.0656	8
Col-0	+5LD	3	221	54.6728	8
Col-0	+5LD	3	249	48.1149	8
Col-0	+5LD	3	265	41.1911	8
Col-0	+5LD	3	327	51.1097	8
Col-0	+5LD	3	328	38.8201	8
Col-0	+5LD	3	330	65.2823	8
Col-0	+5LD	3	342	59.4836	8
Col-0	+5LD	3	355	50.6652	8
Col-0	+5LD	3	360	35.9229	8
Col-0	+5LD	3	363	47.9431	8
Col-0	+5LD	3	382	37.94	8
Col-0	+5LD	3	391	38.023	8
Col-0	+5LD	3	393	38.8981	8
Col-0	+5LD	3	459	54.4076	8
Col-0	+5LD	3	486	37.3433	8
Col-0	+5LD	3	513	43.2991	8
Col-0	+5LD	3	536	42.303	8
Col-0	+5LD	3	538	39.5752	8
Col-0	+5LD	3	562	49.6481	8
Col-0	+5LD	3	594	35.6393	8
Col-0	+5LD	3	603	47.146	8
Col-0	+5LD	3	607	65.0562	8
Col-0	+5LD	3	623	77.592	8
Col-0	+5LD	3	641	37.7873	8
Col-0	+5LD	3	666	35.605	8
Col-0	+5LD	3	671	56.7941	8
Col-0	+5LD	3	707	57.4775	8
Col-0	+5LD	3	712	52.2613	8
Col-0	+5LD	3	774	36.5181	8
Col-0	+5LD	3	791	35.3793	8
Col-0	+5LD	3	824	48.7981	8
Col-0	+5LD	3	841	24.0058	8
Col-0	+5LD	3	907	71.799	8
Col-0	+5LD	3	938	29.1542	8
Col-0	+5LD	3	962	52.9918	8
Col-0	+5LD	3	1008	60.7891	8
Col-0	+5LD	3	1134	66.9578	8
Col-0	+5LD	3	34	40.2027	9
Col-0	+5LD	3	36	30.6648	9
Col-0	+5LD	3	80	38.7518	9
Col-0	+5LD	3	82	70.9596	9
Col-0	+5LD	3	85	71.5294	9
Col-0	+5LD	3	89	55.168	9
Col-0	+5LD	3	98	35.6581	9
Col-0	+5LD	3	105	59.0083	9
Col-0	+5LD	3	168	35.5891	9
Col-0	+5LD	3	194	54.4902	9
Col-0	+5LD	3	211	48.0798	9
Col-0	+5LD	3	231	41.0358	9
Col-0	+5LD	3	276	49.9451	9
Col-0	+5LD	3	299	49.7397	9
Col-0	+5LD	3	304	52.2834	9
Col-0	+5LD	3	305	36.7283	9
Col-0	+5LD	3	306	50.9422	9
Col-0	+5LD	3	313	62.7162	9
Col-0	+5LD	3	315	76.6379	9
Col-0	+5LD	3	318	43.0641	9
Col-0	+5LD	3	323	57.8483	9
Col-0	+5LD	3	329	47.5196	9
Col-0	+5LD	3	339	45.8897	9
Col-0	+5LD	3	402	40.6209	9
Col-0	+5LD	3	414	54.771	9
Col-0	+5LD	3	421	56.9588	9
Col-0	+5LD	3	432	32.5417	9
Col-0	+5LD	3	458	46.1394	9
Col-0	+5LD	3	531	46.8928	9
Col-0	+5LD	3	582	35.3489	9
Col-0	+5LD	3	617	56.9925	9
Col-0	+5LD	3	618	52.1366	9
Col-0	+5LD	3	629	27.7086	9
Col-0	+5LD	3	633	34.4853	9
Col-0	+5LD	3	653	35.6114	9
Col-0	+5LD	3	655	36.0004	9
Col-0	+5LD	3	656	36.3974	9
Col-0	+5LD	3	775	48.3819	9
Col-0	+5LD	3	818	50.099	9
Col-0	+5LD	3	857	45.4555	9
Col-0	+5LD	3	876	50.1566	9
Col-0	+5LD	3	919	65.9619	9
Col-0	+5LD	3	953	33.4921	9
Col-0	+5LD	3	969	51.3543	9
Col-0	+5LD	3	1009	45.4346	9
Col-0	+5LD	3	1011	57.6483	9
Col-0	+5LD	3	1024	71.2213	9
Col-0	+5LD	3	1109	65.1483	9
Col-0	+5LD	3	1110	41.3936	9
Col-0	+5LD	3	1111	35.8501	9
Col-0	+5LD	3	1112	47.8272	9
Col-0	+5LD	3	14	39.2892	10
Col-0	+5LD	3	27	49.9213	10
Col-0	+5LD	3	54	57.2657	10
Col-0	+5LD	3	61	82.6345	10
Col-0	+5LD	3	71	79.9327	10
Col-0	+5LD	3	102	59.923	10
Col-0	+5LD	3	144	28.6697	10
Col-0	+5LD	3	187	38.3158	10
Col-0	+5LD	3	294	42.8512	10
Col-0	+5LD	3	298	52.2228	10
Col-0	+5LD	3	312	64.3493	10
Col-0	+5LD	3	317	48.9234	10
Col-0	+5LD	3	319	36.8746	10
Col-0	+5LD	3	333	46.4686	10
Col-0	+5LD	3	338	37.4404	10
Col-0	+5LD	3	346	39.5248	10
Col-0	+5LD	3	359	40.1906	10
Col-0	+5LD	3	365	27.5571	10
Col-0	+5LD	3	385	46.8443	10
Col-0	+5LD	3	413	77.3527	10
Col-0	+5LD	3	434	36.1134	10
Col-0	+5LD	3	510	47.9669	10
Col-0	+5LD	3	511	54.8668	10
Col-0	+5LD	3	517	71.692	10
Col-0	+5LD	3	518	42.8716	10
Col-0	+5LD	3	519	42.8681	10
Col-0	+5LD	3	527	50.693	10
Col-0	+5LD	3	564	39.177	10
Col-0	+5LD	3	568	60.0881	10
Col-0	+5LD	3	572	69.5153	10
Col-0	+5LD	3	590	42.3728	10
Col-0	+5LD	3	634	54.0523	10
Col-0	+5LD	3	692	40.791	10
Col-0	+5LD	3	699	39.9684	10
Col-0	+5LD	3	732	37.1106	10
Col-0	+5LD	3	738	36.9394	10
Col-0	+5LD	3	760	48.3692	10
Col-0	+5LD	3	766	43.5936	10
Col-0	+5LD	3	858	47.0957	10
Col-0	+5LD	3	884	44.3104	10
Col-0	+5LD	3	932	63.4285	10
Col-0	+5LD	3	1012	36.8941	10
Col-0	+5LD	3	1013	52.4543	10
Col-0	+5LD	3	1025	44.4512	10
Col-0	+5LD	3	1026	31.038	10
Col-0	+5LD	3	124	47.8931	11
Col-0	+5LD	3	159	43.0079	11
Col-0	+5LD	3	179	49.8035	11
Col-0	+5LD	3	292	47.084	11
Col-0	+5LD	3	296	35.4388	11
Col-0	+5LD	3	297	43.8952	11
Col-0	+5LD	3	337	38.6292	11
Col-0	+5LD	3	423	39.2624	11
Col-0	+5LD	3	430	79.1845	11
Col-0	+5LD	3	467	53.5766	11
Col-0	+5LD	3	506	74.6525	11
Col-0	+5LD	3	526	50.7141	11
Col-0	+5LD	3	539	31.8615	11
Col-0	+5LD	3	544	47.3113	11
Col-0	+5LD	3	545	36.8623	11
Col-0	+5LD	3	554	42.6549	11
Col-0	+5LD	3	565	33.2253	11
Col-0	+5LD	3	574	37.8549	11
Col-0	+5LD	3	583	54.4674	11
[truncated: 8,128 more rows]
