# Supplementary material for: Regulation of shoot meristem shape by photoperiodic signaling and phytohormones during floral induction of Arabidopsis
Source: eLife journal article supplement (doi:10.7554/elife.60661), 2020-12-14
Supplement: supp [file elife-60661-supp-v1.zip › elife_poa_e60661_Figure_8_source_data_1.xlsx]

## Sheet: SOC1-ChIP in soc1
Original ChIP-PCR data for Figure 8B
							Average				Standard Deviation
CArG-box	Replicate	Col	soc1			CArG-box	Col	soc1			Col	soc1
a	A	1.7201	0.4353			a	1.52137	0.572233			0.175532	0.135912
	B	1.4565	0.7071			b	2.19	0.543433			0.458335	0.092715
	C	1.3875	0.5743			c	1.65647	0.389333			0.435075	0.140666
						d	1.26627	0.515333			0.252874	0.164205
b	A	1.7654	0.4368			e	0.677633	0.5531			0.042601	0.0987913
	B	2.1287	0.5885			f	0.682267	0.518267			0.128079	0.0781327
	C	2.6759	0.605			g	0.786867	0.487333			0.27185	0.171589
						h	0.6469	0.421167			0.113648	0.0874227
c	A	1.4983	0.2579			i	0.685567	0.458933			0.19528	0.108139
	B	1.3226	0.3724			j	0.856467	0.519033			0.280068	0.151713
	C	2.1485	0.5377			k	0.623433	0.528233			0.144119	0.159169
						l	0.827933	0.5877			0.30893	0.244353
d	A	1.1013	0.3356			m	0.6573	0.472633			0.243341	0.10629
	B	1.1401	0.6575			n	0.513	0.476033			0.0657913	0.0337907
	C	1.5574	0.5529
e	A	0.6314	0.6632
	B	0.7153	0.5239				Data below is normalised against CArG-box a in soc1
	C	0.6862	0.4722
							Average				Standard Deviation
f	A	0.5359	0.5574			CArG-box	Col	soc1			Col	soc1
	B	0.7738	0.4283			a	2.65866	1.00001			0.306751	0.237513
	C	0.7371	0.5691			b	3.82713	0.949676			0.800963	0.162024
						c	2.89476	0.680379			0.760315	0.245822
g	A	0.483	0.2892			d	2.21286	0.90057			0.44191	0.286957
	B	1.007	0.5864			e	1.1842	0.966569			0.0744473	0.172643
	C	0.8706	0.5864			f	1.19229	0.905696			0.223824	0.136541
						g	1.37509	0.851639			0.475071	0.299859
h	A	0.5734	0.5123			h	1.13049	0.736009			0.198606	0.152775
	B	0.5895	0.4132			i	1.19806	0.802009			0.341261	0.188977
	C	0.7778	0.338			j	1.49672	0.907036			0.489432	0.265125
						k	1.08948	0.923114			0.251856	0.278156
i	A	0.7955	0.3525			l	1.44685	1.02703			0.539871	0.427018
	B	0.4601	0.5687			m	1.14866	0.82595			0.42525	0.185747			Col
	C	0.8011	0.4556			n	0.896493	0.831892			0.114973	0.059051			soc1-2
j	A	1.0389	0.6938
	B	0.9965	0.4421
	C	0.534	0.4212
k	A	0.5239	0.549
	B	0.7887	0.3597
	C	0.5577	0.676
l	A	0.4931	0.3094
	B	0.8888	0.6866
	C	1.1019	0.7671
m	A	0.4617	0.3499
	B	0.9298	0.534
	C	0.5804	0.534
n	A	0.509	0.4863
	B	0.5807	0.5035
	C	0.4493	0.4383

## Sheet: SVP-ChIP in soc1 svp
Original ChIP-PCR data for Figure 8C
								Average				Standard Deviation
CArG-box	Replicate	Col	soc1	soc1 svp			CArG-box	Col	soc1	soc1 svp		Col	soc1	soc1 svp
a	A	1.194	1.8489	0.5704			a	1.04323	1.75227	0.764767		0.24023	0.126117	0.170454
	B	0.7662	1.7983	0.8351			b	2.35673	4.37637	0.8187		0.285356	1.06294	0.313187
	C	1.1695	1.6096	0.8888			c	1.6539	2.7528	0.797533		0.0705439	0.0291978	0.136778
							d	1.09513	1.5719	0.757433		0.420036	0.221755	0.153456
b	A	2.682	3.2792	0.6057			e	0.8113	1.10613	0.5531		0.270755	0.132221	0.0772328
	B	2.1485	5.4014	0.6721			f	0.722933	0.853667	0.686		0.103691	0.105836	0.136675
	C	2.2397	4.4485	1.1783			g	0.913867	1.16333	0.748233		0.280693	0.0963793	0.3177
							h	0.995933	2.3632	0.681867		0.236112	0.646701	0.145676
c	A	1.7351	2.7274	0.894			i	0.951967	2.0002	0.481733		0.232105	0.258092	0.0960299
	B	1.6189	2.7463	0.8576			j	0.908833	1.1409	0.603467		0.277205	0.2545	0.0607702
	C	1.6077	2.7847	0.641			k	1.03983	1.19293	0.748767		0.198774	0.115645	0.0690635
							l	0.9834	1.03317	0.713033		0.369276	0.253201	0.197224
d	A	0.8467	1.454	0.8279			m	0.967667	1.15057	0.767867		0.130322	0.325764	0.316477
	B	1.5801	1.8277	0.863			n	0.707067	1.07923	0.629467		0.0585766	0.184731	0.213158
	C	0.8586	1.434	0.5814
e	A	1.083	0.9582	0.5176
	B	0.5415	1.1474	0.6417				Data below is normalised against CArG-box a in soc1 svp
	C	0.8094	1.2128	0.5
								Average				Standard Deviation
f	A	0.6563	0.951	0.605			CArG-box	Col	soc1	soc1 svp		Col	soc1	soc1 svp
	B	0.8424	0.741	0.6092			a	1.36406	2.29114	0.999956		0.314109	0.164902	0.222875
	C	0.6701	0.869	0.8438			b	3.0815	5.72224	1.07048		0.373112	1.38982	0.409502
							c	2.16253	3.59937	1.0428		0.0922383	0.038177	0.178842
g	A	0.8655	1.2702	0.9749			d	1.43192	2.05531	0.990368		0.54921	0.289951	0.200649
	B	0.6605	1.083	0.8847			e	1.0608	1.4463	0.723196		0.354021	0.172884	0.100984
	C	1.2156	1.1368	0.3851			f	0.945258	1.1162	0.896967		0.135579	0.138384	0.178707
							g	1.19491	1.52109	0.978339		0.367015	0.126019	0.415403
h	A	0.917	1.7171	0.8467			h	1.30221	3.08996	0.891562		0.308724	0.845582	0.190476
	B	1.2614	2.362	0.5704			i	1.24473	2.61532	0.629881		0.303484	0.337464	0.125562
	C	0.8094	3.0105	0.6285			j	1.18833	1.49176	0.789052		0.362454	0.332766	0.0794589
							k	1.35961	1.5598	0.979036		0.259903	0.15121	0.0903028
i	A	1.192	1.7033	0.4219			l	1.28583	1.3509	0.932313		0.48284	0.331068	0.257876		Col
	B	0.7287	2.171	0.5925			m	1.26525	1.5044	1.00401		0.1704	0.425947	0.413804		soc1-2
	C	0.9352	2.1263	0.4308			n	0.924512	1.41113	0.823047		0.0765907	0.241542	0.27871		soc1-2 svp-41
j	A	0.6307	1.3803	0.5704
	B	0.9107	1.1688	0.5664
	C	1.1851	0.8736	0.6736
k	A	0.838	1.3104	0.8039
	B	1.2354	1.0792	0.7711
	C	1.0461	1.1892	0.6713
l	A	0.695	1.1186	0.5694
	B	1.3996	1.2326	0.9379
	C	0.8556	0.7483	0.6318
m	A	1.1154	1.2702	1.0867
	B	0.9186	0.7819	0.7631
	C	0.869	1.3996	0.4538
n	A	0.691	1.2924	0.8756
	B	0.772	0.9794	0.5064
	C	0.6582	0.9659	0.5064

## Sheet: SOC1-GR (GA2OX4)
Original RT-qPCR data for Figure 8D
		mock	mock	mock		DEX	DEX	DEX
	Replicate	A	B	C		A	B	C
	20	1.05666	0.98998	1.31186		1.0754	1.11784	1.25431
	40	1	1.05562	1.21666		1.18544	0.93998	1.19027
	60	0.93803	1.18402	1.05262		0.8746	0.89964	0.84128
	120	1.03488	1.12557	1.01479		0.78305	0.78345	0.65077
										Data below is normalised against value after 20min mock treatment
		35S::SOC1:GR soc1-1 ± DEX								35S::SOC1:GR soc1-1 ± DEX
		Average			Standard Deviation					Average			Standard Deviation
		mock	DEX		mock	DEX				mock	DEX		mock	DEX
	20	1.1195	1.14918		0.169892	0.0934826			20	1	1.02651		0.151757	0.0835039
	40	1.09076	1.10523		0.112523	0.143131			40	0.974328	0.987253		0.100512	0.127853
	60	1.05822	0.87184		0.123091	0.0292777			60	0.945264	0.778776		0.109951	0.0261525
	120	1.05841	0.73909		0.0590205	0.0764876			120	0.945434	0.660197		0.0527204	0.068323
