# Supplementary material for: Regulation of shoot meristem shape by photoperiodic signaling and phytohormones during floral induction of Arabidopsis
Source: eLife journal article supplement (doi:10.7554/elife.60661), 2020-12-14
Supplement: supp [file elife-60661-supp-v1.zip › elife_poa_e60661_Supplementary_file_1.xlsx]

## Sheet: Supplementary File 1
Supplementary File 1. Primers used for cloning in this study.
Code	Sequence	description	purpose
Q001	ggggacaagtttgtacaaaaaagcaggcttcAGCTTGTGGAGTCATGTTTTCCGAT	GW+GA20ox2 promoter	intergenomic region amplification
Q002	ggggaccactttgtacaagaaagctgggtcctaGAAGAAAAATTTCTTTGAATTTTTCATTCAAATTATT	GW+GA20ox2 terminator	intergenomic region amplification
Q062	CCTCGCCCTTGCTCACCATttcttttcttttttttttcttgagagttttggg	VENUS CDS+GA20ox2 promoter	Opening plasmid
Q063	CCGCTGCGGCAGCGatggcgatactatgcacaacaacatctc	G9A+GA20ox2 Exon 1	Opening plasmid
Q061	cccaaaactctcaagaaaaaaaaaagaaaagaaATGGTGAGCAAGGGCGAGG	GA20ox2 promoter+VENUS CDS	VENUS CDS amplification
A166	CGCTGCCGCAGCGGCAGCAGCCGCAGCGCCcttgtacagctcgtccatgccg	G9A+VENUS CDS	VENUS CDS amplification
A003	ggggacaagtttgtacaaaaaagcaggcttcGTTTTGGGTTTGAAGGTGATTTATTTATAGGGTT	GW+GA2ox4 promoter	intergenomic region amplification
A002	ggggaccactttgtacaagaaagctgggtcTTGATGCATGATGTGTATATGAAGTGAACATC	GW+GA2ox4 terminator	intergenomic region amplification
A167	ggcgctgcggctgctgccgctgcggcagcgATGGTGAAAGGGTCCCAGAAAATC	G9A+GA2ox4 Exon 1	Opening plasmid
A168	ctcgcccttgctcaccatTTTTAGAGAAAGGGAGAGAGGGATTTTATGAGA	VENUS CDS+GA2ox4 promoter	Opening plasmid
A165	tctcataaaatccctctctccctttctctaaaaATGGTGAGCAAGGGCGAG	GA2ox4 promoter+VENUS CDS	VENUS CDS amplification
A166	cgctgccgcagcggcagcagccgcagcgccCTTGTACAGCTCGTCCATGCCG	G9A+VENUS CDS	VENUS CDS amplification
A342	caccGTGGCAGTAACTAAAATGAC	cacc+GA2ox2 promoter	intergenomic region amplification
A343	GTTGACTTGACTCCTAAATG	GA2ox2 terminator	intergenomic region amplification
A356	ggcgctgcggctgctgccgctgcggcagcgATGGTGGTTTTGCCACAG	G9A+GA2ox2 Exon 1	Opening plasmid
A355	ctcgcccttgctcaccatGTTTGGTTTTTGTAGGTTTAC	VENUS CDS+GA2ox2 promoter	Opening plasmid
A354	gtaaacctacaaaaaccaaacATGGTGAGCAAGGGCGAG	GA2ox2 promoter+VENUS CDS	VENUS CDS amplification
A166	cgctgccgcagcggcagcagccgcagcgccCTTGTACAGCTCGTCCATGCCG	G9A+VENUS CDS	VENUS CDS amplification
A313	caccATATGGGTTCAATACTGTGGAC	cacc+GA2ox6 promoter	intergenomic region amplification
A314	GTTAGGGTCAGATGTGGTTC	GA2ox6 terminator	intergenomic region amplification
A320	ggcgctgcggctgctgccgctgcggcagcgATGGTTTTGCCATCTTCAAC	G9A+GA2ox6 Exon 1	Opening plasmid
A319	ctcgcccttgctcaccatGTCCCTTTTTTATTTTTTTCAAAAAATG	VENUS CDS+GA2ox6 promoter	Opening plasmid
A318	cattttttgaaaaaaataaaaaagggacATGGTGAGCAAGGGCGAG	GA2ox6 promoter+VENUS CDS	VENUS CDS amplification
A166	cgctgccgcagcggcagcagccgcagcgccCTTGTACAGCTCGTCCATGCCG	G9A+VENUS CDS	VENUS CDS amplification
