# Supplementary material for: Regulation of shoot meristem shape by photoperiodic signaling and phytohormones during floral induction of Arabidopsis
Source: eLife journal article supplement (doi:10.7554/elife.60661), 2020-12-14
Supplement: supp [file elife-60661-supp-v1.zip › elife_poa_e60661_Supplementary_file_2.xlsx]

## Sheet: Supplementary File 2
Supplementary File 2. Primers used for RT-qPCR in this study.
Code	Sequence	Target gene
A176	CCTCCTCAAGTTCGATTCTTGAC	PEX4
A177	GAGCCATCAATGCTATGATAGCTC	PEX4
A216	GCAGATTCTCCACTAAGCTCC	GA20ox2
A217	CCAGAAGCTCCATGATCTTGAG	GA20ox2
A204	CGTTGGTTGGATTGAGTATCTCC	GA2ox2
A205	GACACTTCCTTAATCTCCTTCATG	GA2ox2
A352	GGCTCCAAGTGTCCAATTCA	GA2ox4
A353	TCCTACATTGACGCAGAAAGC	GA2ox4
A208	GAGTATCTTCTTCTCCACGCAAATC	GA2ox6
A209	CGATCGTCAGATCAATGATCTCAC	GA2ox6
A195	CAGGTTTAGCAGTACTGAGAGTG	SOC1
A196	ACATTCTAGAGAGGCAAGTGTAAG	SOC1
A415	AAGAGAACGAGCGACTTGG	SVP
A416	ATACGGTAAGCCGAGCCTAA	SVP
UBC21.qLP	TCCTCTTAACTGCGACTCAGG	PEX4 (2)
UBC21.qRP	GCGAGGCGTGTATACATTTG	PEX4 (2)
GA2OX4.qLP	ACTTGTTACAGGTGATGACGAAC	GA2ox4 (2)
GA2OX4.qRP	TGAAGCGGTGGTCCGGCAAAGTACG	GA2ox4 (2)
