# Supplementary material for: Regulation of shoot meristem shape by photoperiodic signaling and phytohormones during floral induction of Arabidopsis
Source: eLife journal article supplement (doi:10.7554/elife.60661), 2020-12-14
Supplement: supp [file elife-60661-supp-v1.zip › elife_poa_e60661_Supplementary_file_3.xlsx]

## Sheet: Supplementary File 3
Supplementary File 3. Putative CArG-boxes and positions in GA2ox4.
CArG-box	CArG-box sequence	CArG-box position	orientation
CArG-box a	gaaCAATAAAAGGata	-4285	plus
CArG-box b	aagCAAATTTGGgtt	-4096	plus
CArG-box c	agcCCAATTTAAGatc	-3927	minus
CArG-box d1	agcCCTTTTTTGGagc	-3761	plus
CArG-box d2	gctCCAAAAAAGggc	-3752	minus
CArG-box e	ggtCATTTTTGGtca	-3475	minus
CArG-box f	gctCCAAATTAGtaa	-1879	plus
CArG-box g	taaCCATAAAAGtct	-1353	plus
CArG-box h	ataCATAAAAGGtga	751	minus
CArG-box i	actCAATAATGGctc	1068	plus
CArG-box j	aaaCCATAAAAGcca	1795	plus
CArG-box k	taaCCTTTTATAGatt	3016	plus
CArG-box l	aaaCCAAATTAGtta	3802	plus
CArG-box m	aacCCAAATAAGtta	4652	minus
CArG-box n	gatCATATATGGtag	5296	plus
