# Supplementary material for: Regulation of shoot meristem shape by photoperiodic signaling and phytohormones during floral induction of Arabidopsis
Source: eLife journal article supplement (doi:10.7554/elife.60661), 2020-12-14
Supplement: supp [file elife-60661-supp-v1.zip › elife_poa_e60661_Supplementary_file_4.xlsx]

## Sheet: Supplementary File 4
Supplementary File 4. Primers used for ChIP-qPCR for GA2ox4.
Primer name	Primer sequence	Primer length	Primer position	Amplicon length	Purpose
GA2ox4LP CArG-box a	ATGAGAAATGAACGGAGAAGTGT	23	-4348	118	ChIP-qPCR
GA2ox4RP CArG-box a	TGCGAAGATTTATTTTCTTGCAGAT	25	-4230
GA2ox4LP CArG-box b	TCGAACAGTTAAACAATCTTTATC	24	-4144	104	ChIP-qPCR
GA2ox4RP CArG-box b	TACAGATATAACCGGCCAATGCAT	24	-4040
GA2ox4LP CArG-box c	AGAATGCACGAAACCAATTTCGGC	24	-3992	134	ChIP-qPCR
GA2ox4RP CArG-box c	TACTAAGCCCTAATTGATTTGTGCT	25	-3858
GA2ox4LP CArG-box d	TGAATTTCATAGTACTATAGAGT	23	-3779	135	ChIP-qPCR
GA2ox4RP CArG-box d	ATGCAATCAAAGTGGTAATGCTCA	24	-3644
GA2ox4LP CArG-box e	AGGCTCGGTTAACATGATAAACTAG	25	-3554	143	ChIP-qPCR
GA2ox4RP CArG-box e	ATACATGATCAATAGCAAAGGCTTA	25	-3411
GA2ox4LP CArG-box f	TACAGATTTAGACTCTCATGTTTC	24	-1953	177	ChIP-qPCR
GA2ox4RP CArG-box f	TACCATTATTAATTTGTAAGGTT	23	-1776
GA2ox4LP CArG-box g	ATACATTCGAACACGAATAAATGG	24	-1420	142	ChIP-qPCR
GA2ox4RP CArG-box g	ATACAAATTTATTGACCACCAACTGC	26	-1278
GA2ox4LP CArG-box h	AACTTGTAGGTCTACATTTATG	22	659	166	ChIP-qPCR
GA2ox4RP CArG-box h	TGGTTTCTCCAGACTCTAGTATTGT	25	825
GA2ox4LP CArG-box i	TGTTCGTACTAATGTTTCAACAGT	24	1026	157	ChIP-qPCR
GA2ox4RP CArG-box i	TATACGAAATATATCCACGTAACCT	25	1183
GA2ox4LP CArG-box j	TAGTCCTAAACGAAATCAGAAACCG	25	1711	190	ChIP-qPCR
GA2ox4RP CArG-box j	AGGTCCACAACATTGATAAATGACAG	26	1901
GA2ox4LP CArG-box k	TACACTCTAATCATAATTTACAT	23	2926	169	ChIP-qPCR
GA2ox4RP CArG-box k	CTACATGCACTGATGCACGAGTT	23	3095
GA2ox4LP CArG-box l	ATGTAAAAATCTTAAATTTCACTTA	25	3737	132	ChIP-qPCR
GA2ox4RP CArG-box l	TGACTGAAGTGGTGGACTTTGTCG	24	3869
GA2ox4LP CArG-box m	TCTGTGATCCTCCTTACTCGACGT	24	4569	142	ChIP-qPCR
GA2ox4RP CArG-box m	TAGTTACTCCAACTCATGTAACACT	25	4711
GA2ox4LP CArG-box n	TATGTTATCAAATACTCATAATGT	24	5232	144	ChIP-qPCR
GA2ox4RP CArG-box n	ACATGAGTTTAGCAAAAAGTTTATG	25	5376
