# Supplementary figures and images for: Regulation of shoot meristem shape by photoperiodic signaling and phytohormones during floral induction of Arabidopsis
Source: eLife journal article supplement (doi:10.7554/elife.60661), 2020-12-14

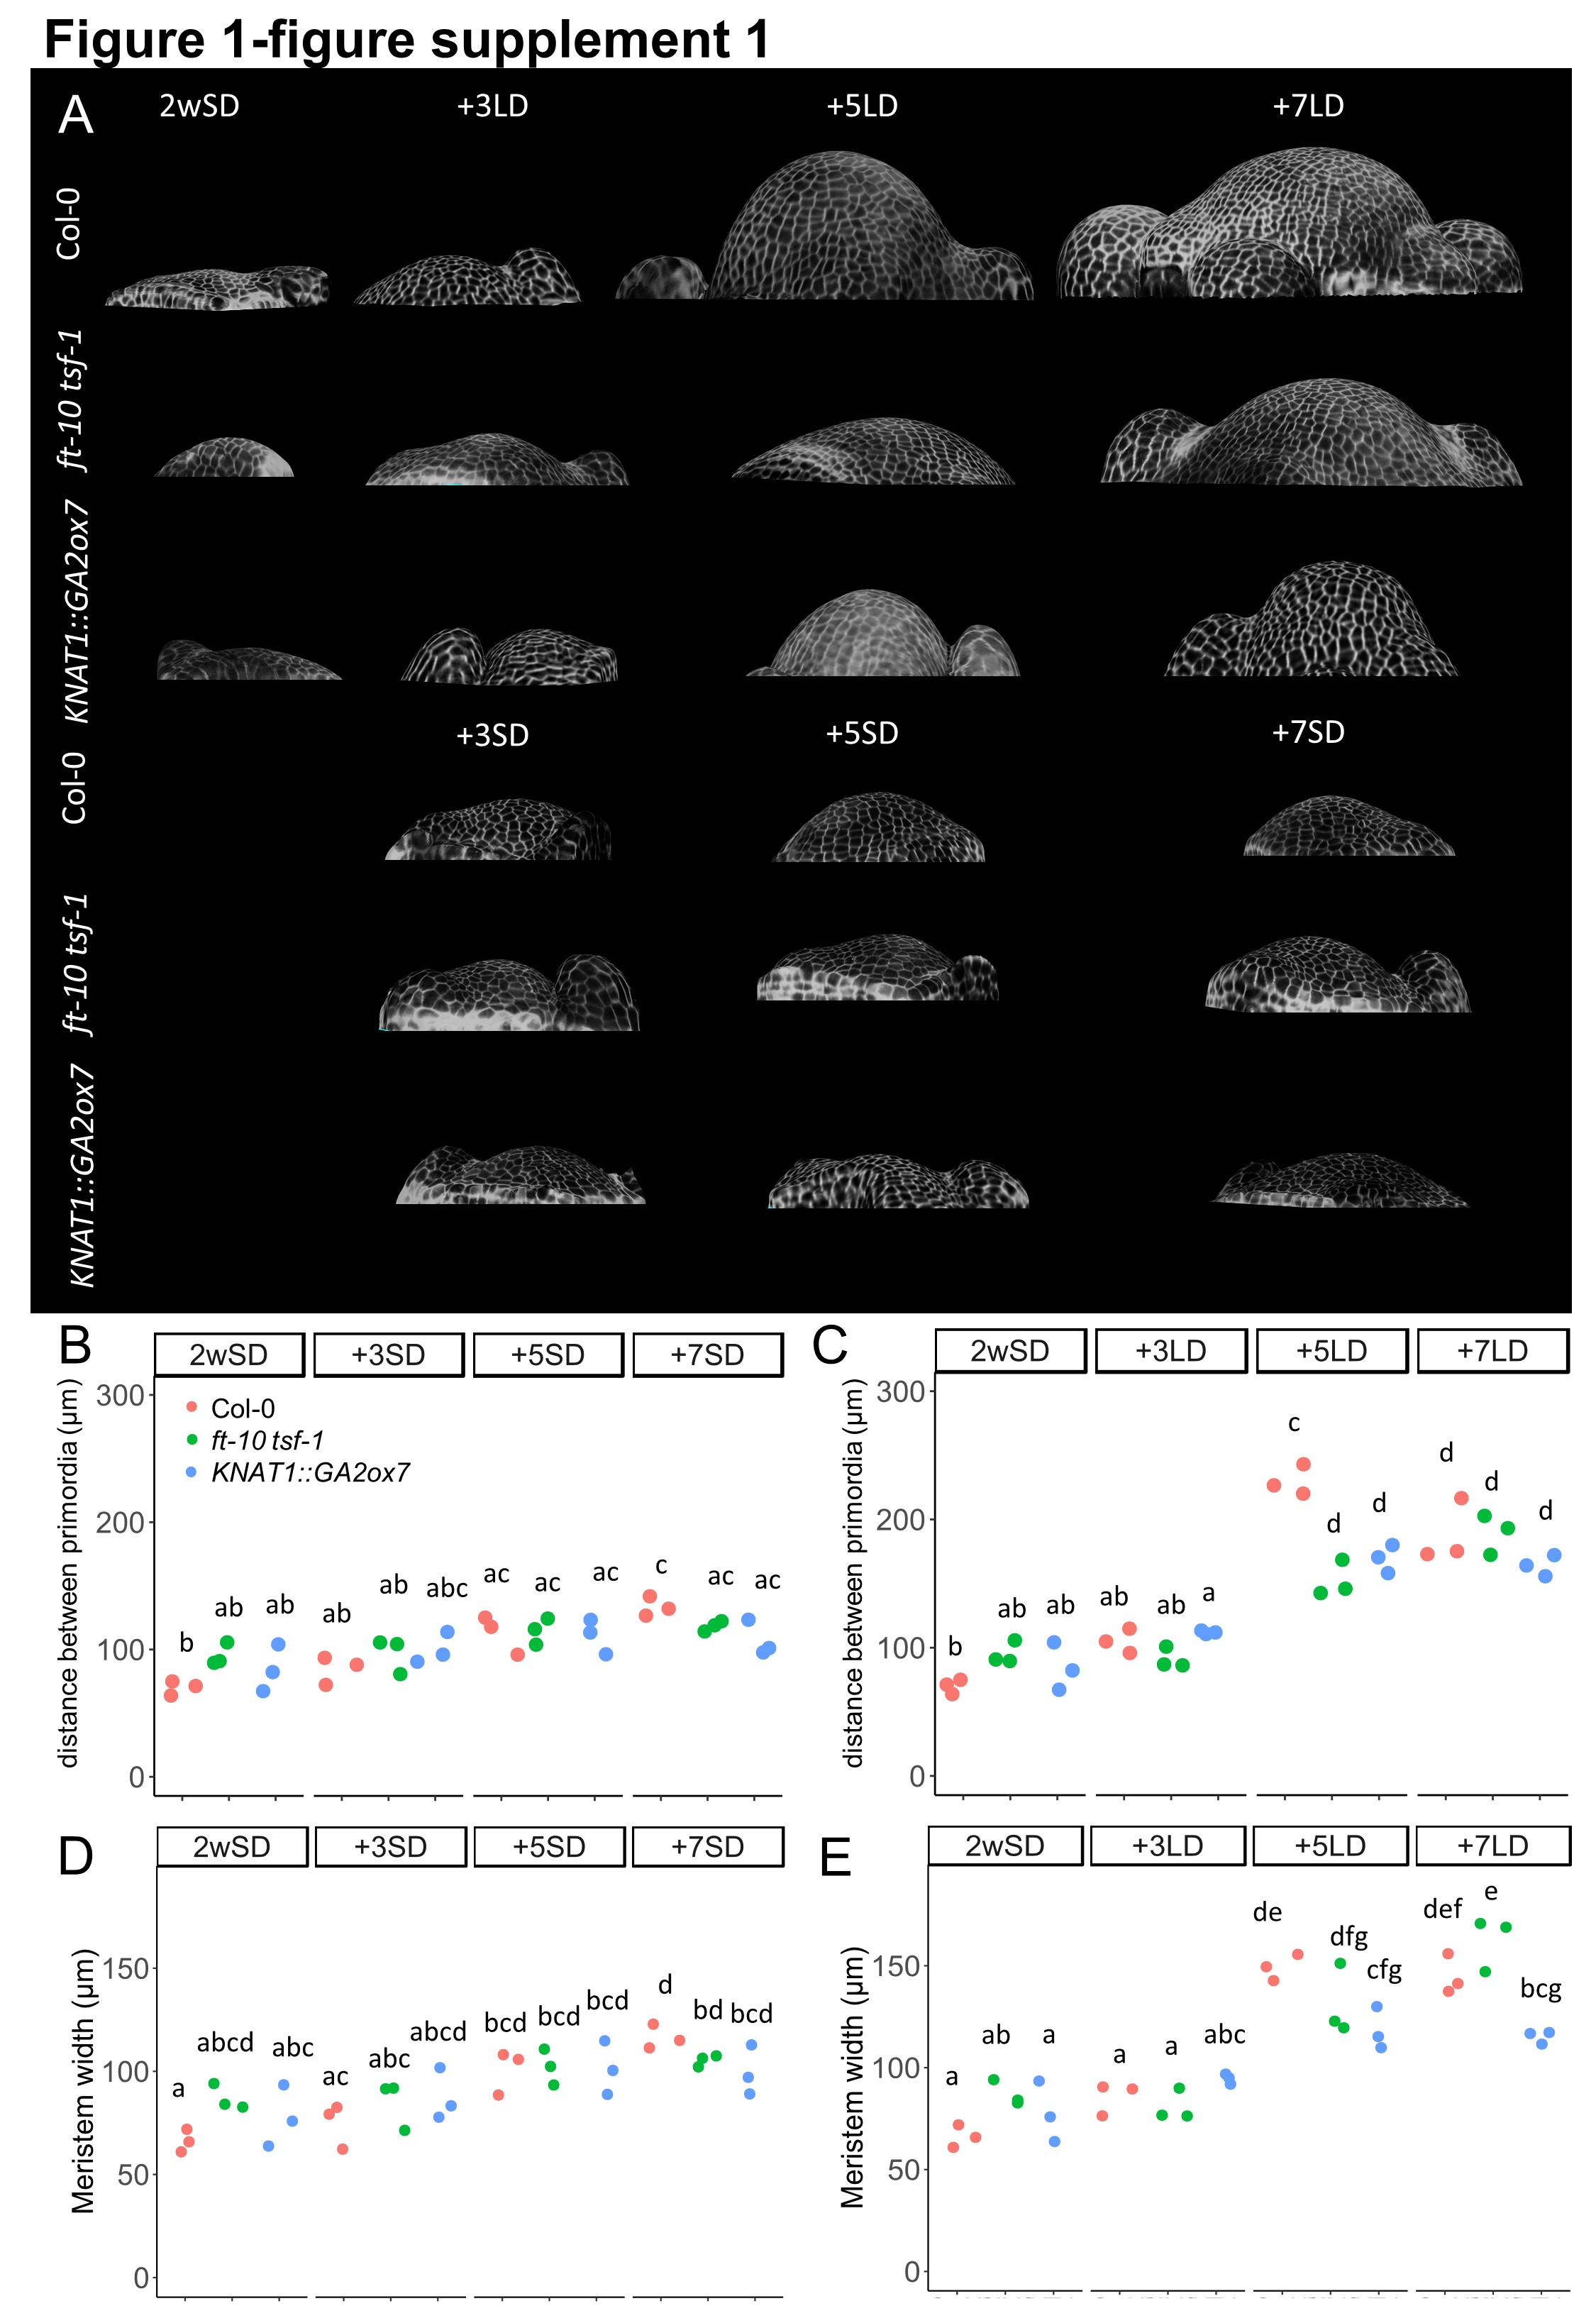

Supplement: supp [file elife-60661-supp-v1.zip › elife_poa_e60661_Figure_1_figure_supplement_1.jpg]

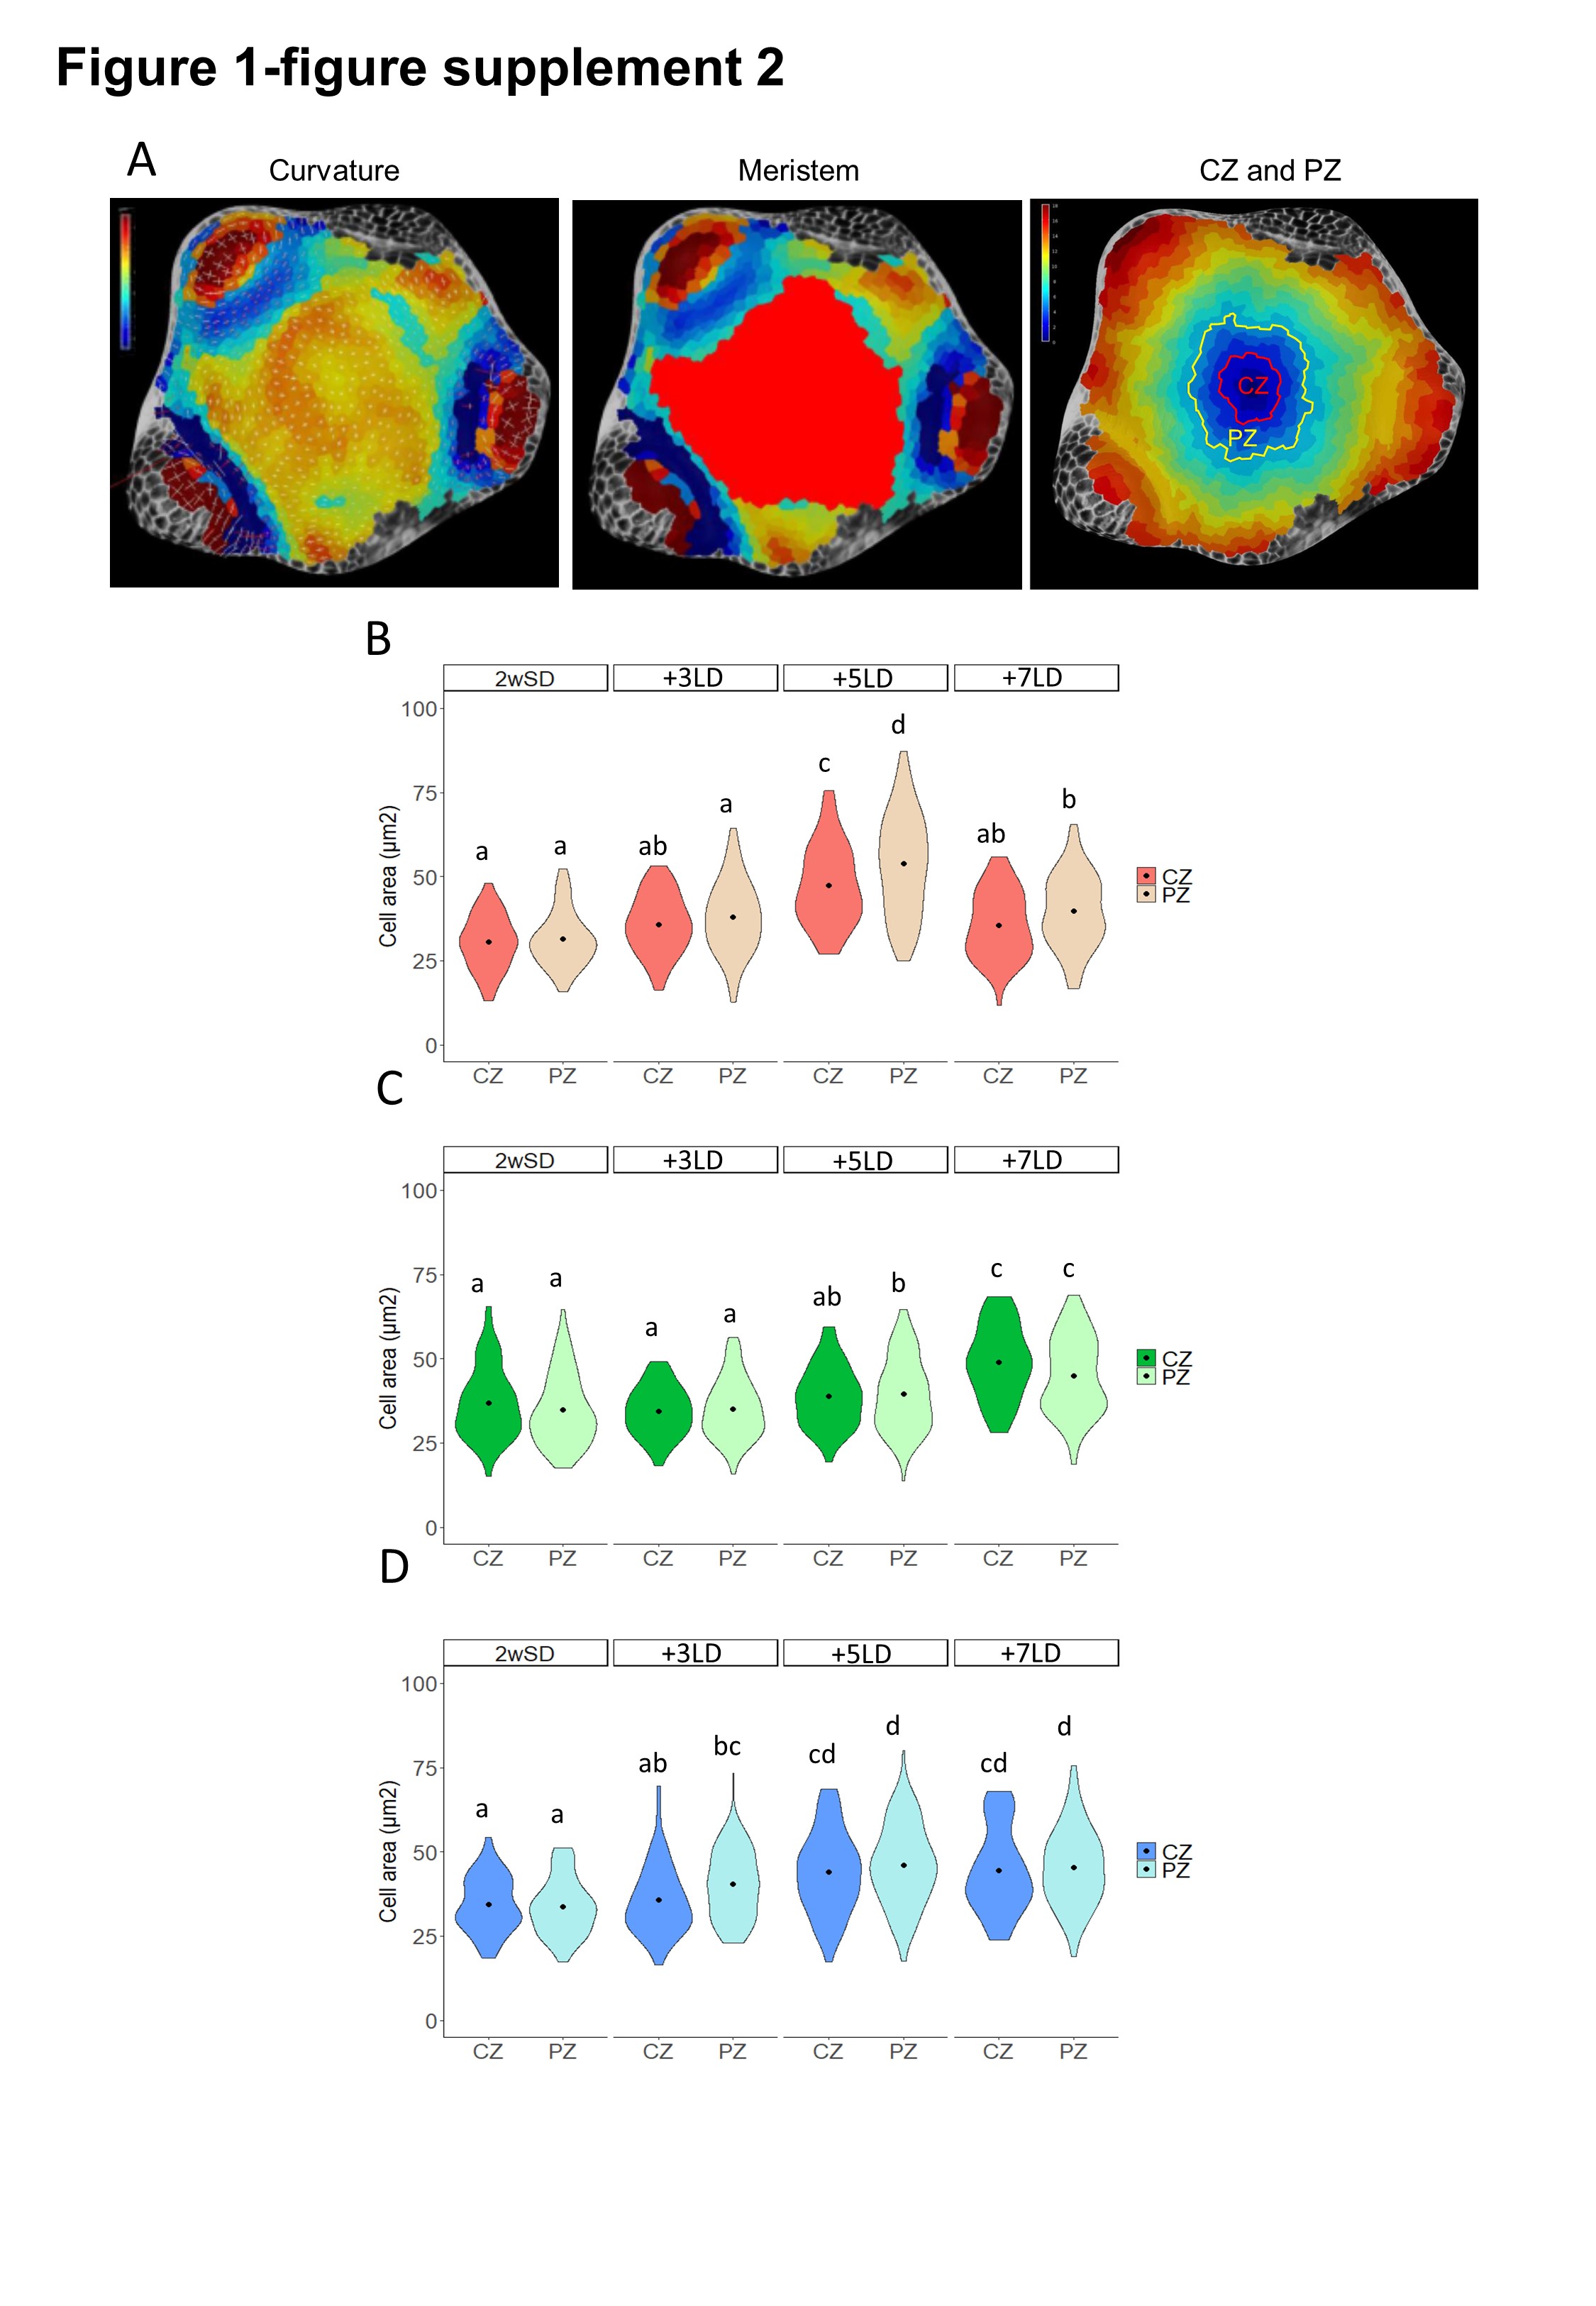

Supplement: supp [file elife-60661-supp-v1.zip › elife_poa_e60661_Figure_1_figure_supplement_2.jpg]

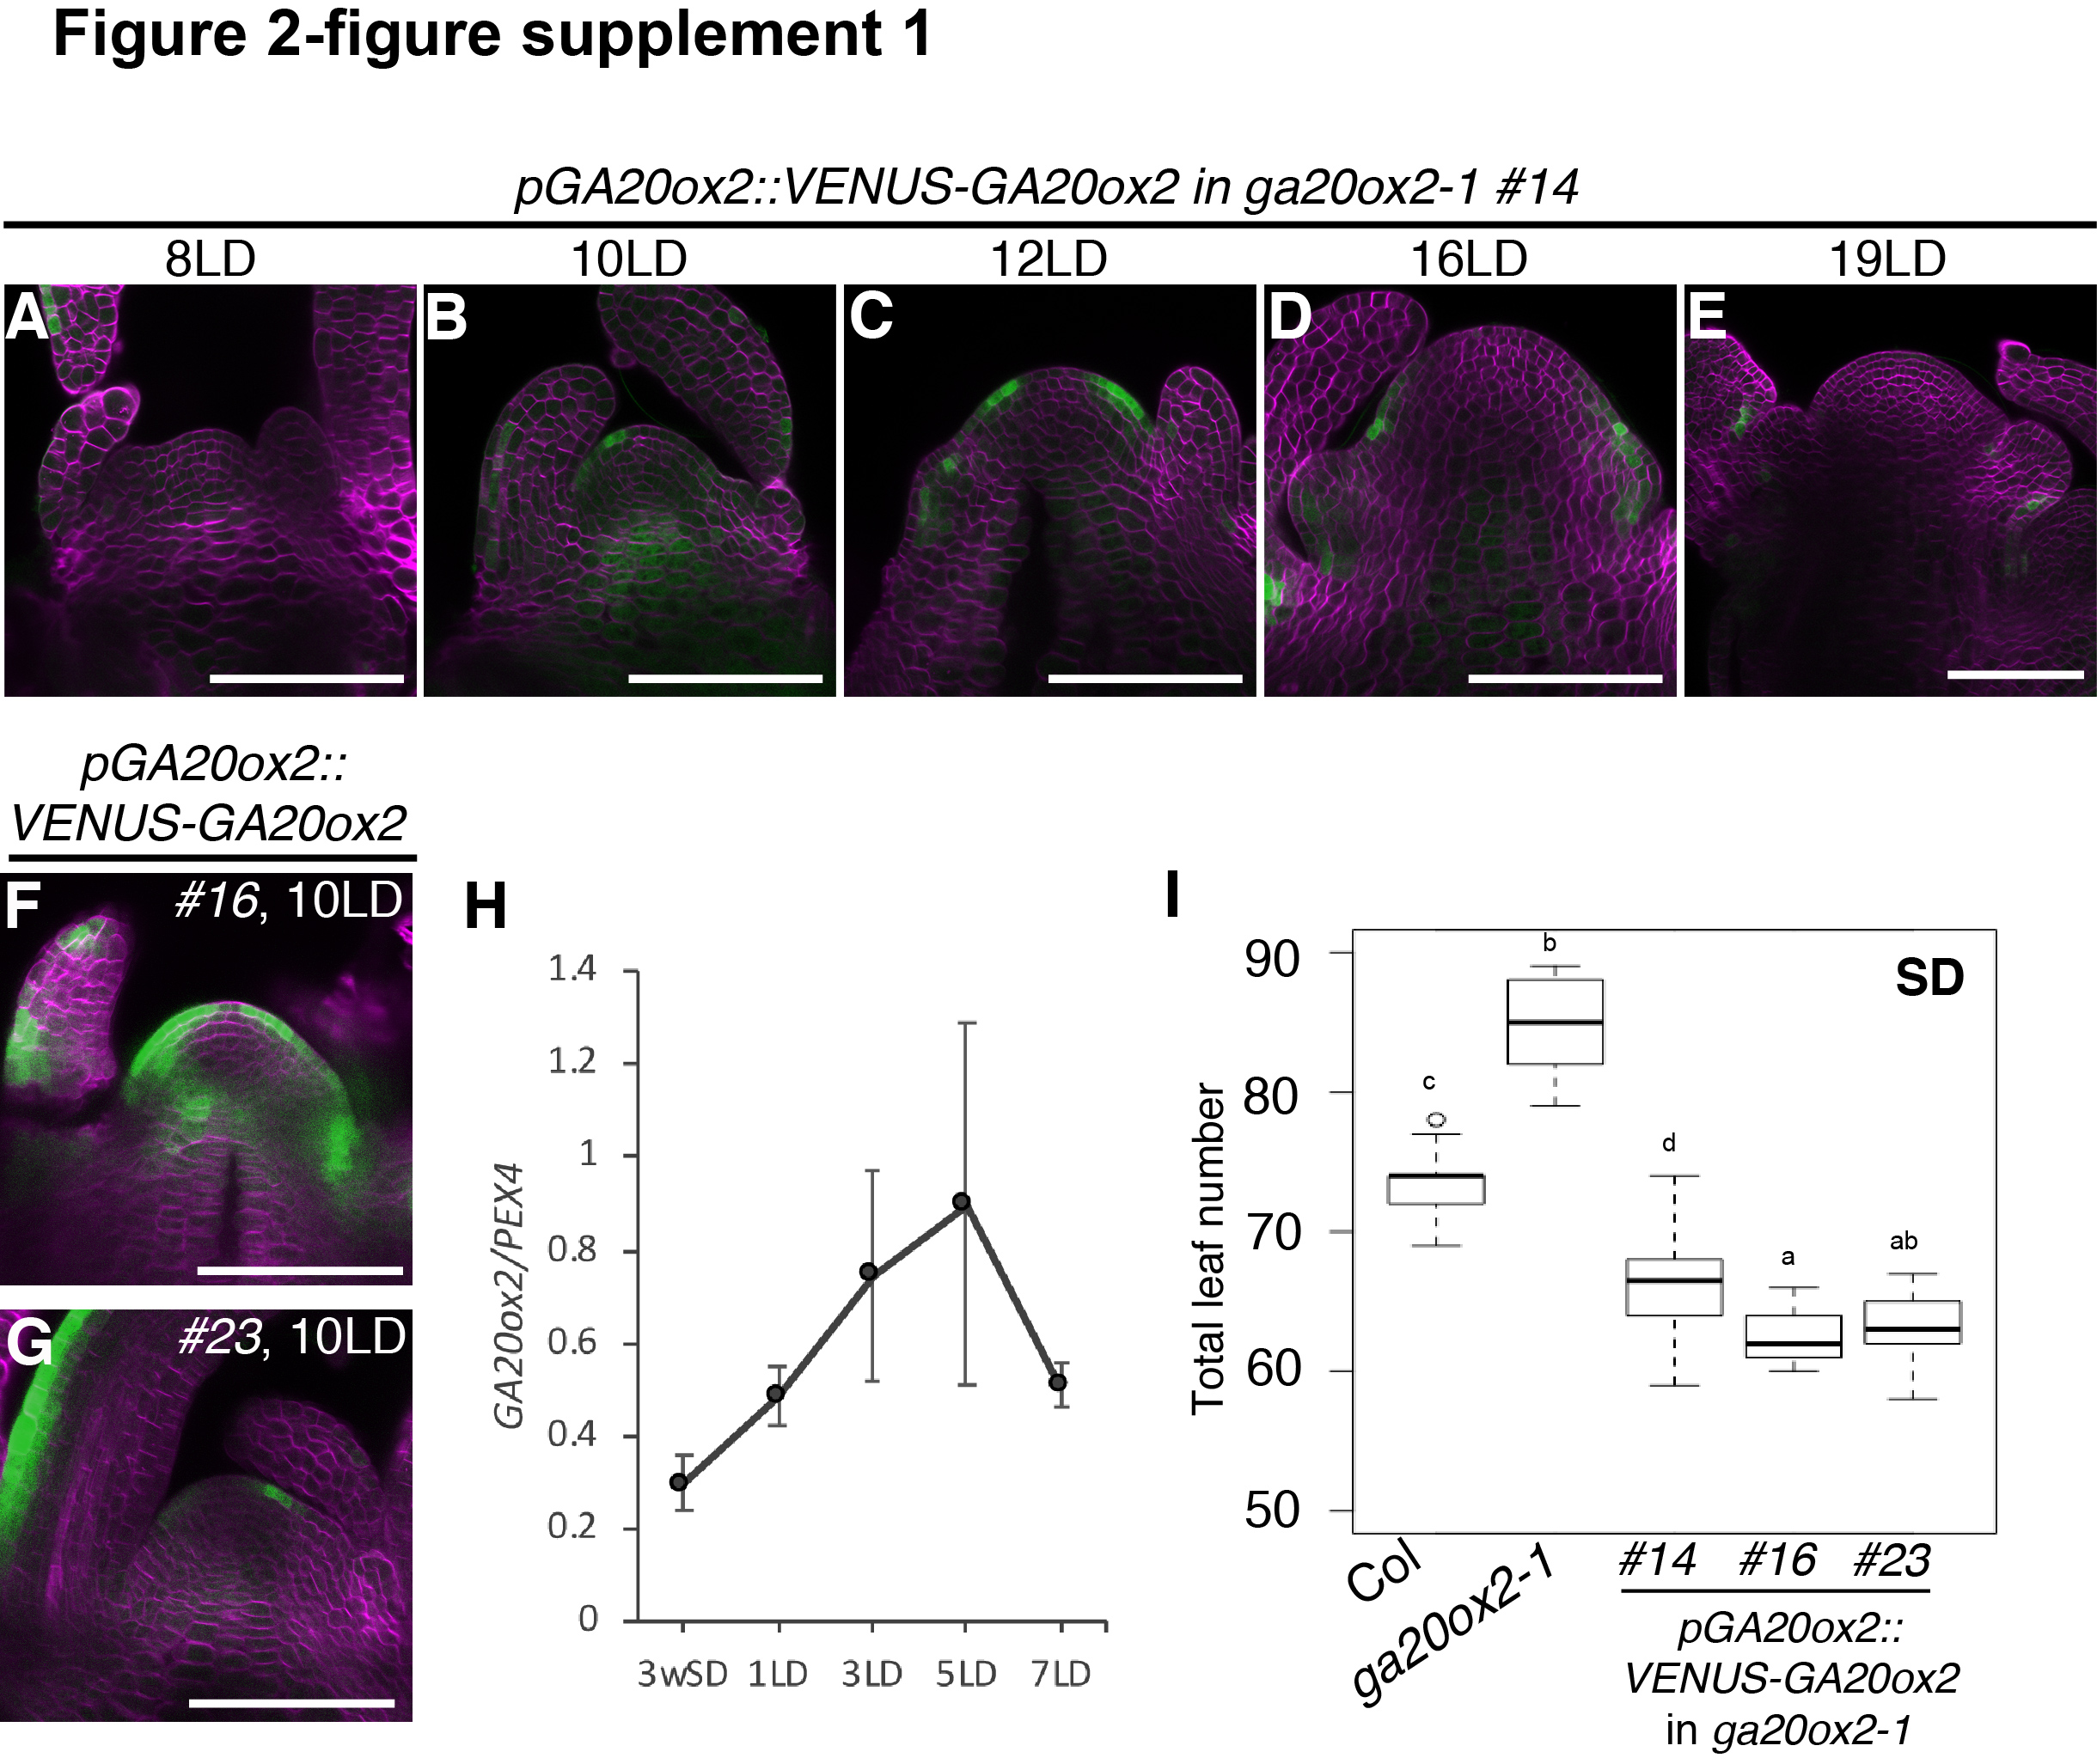

Supplement: supp [file elife-60661-supp-v1.zip › elife_poa_e60661_Figure_2_figure_supplement_1.jpg]

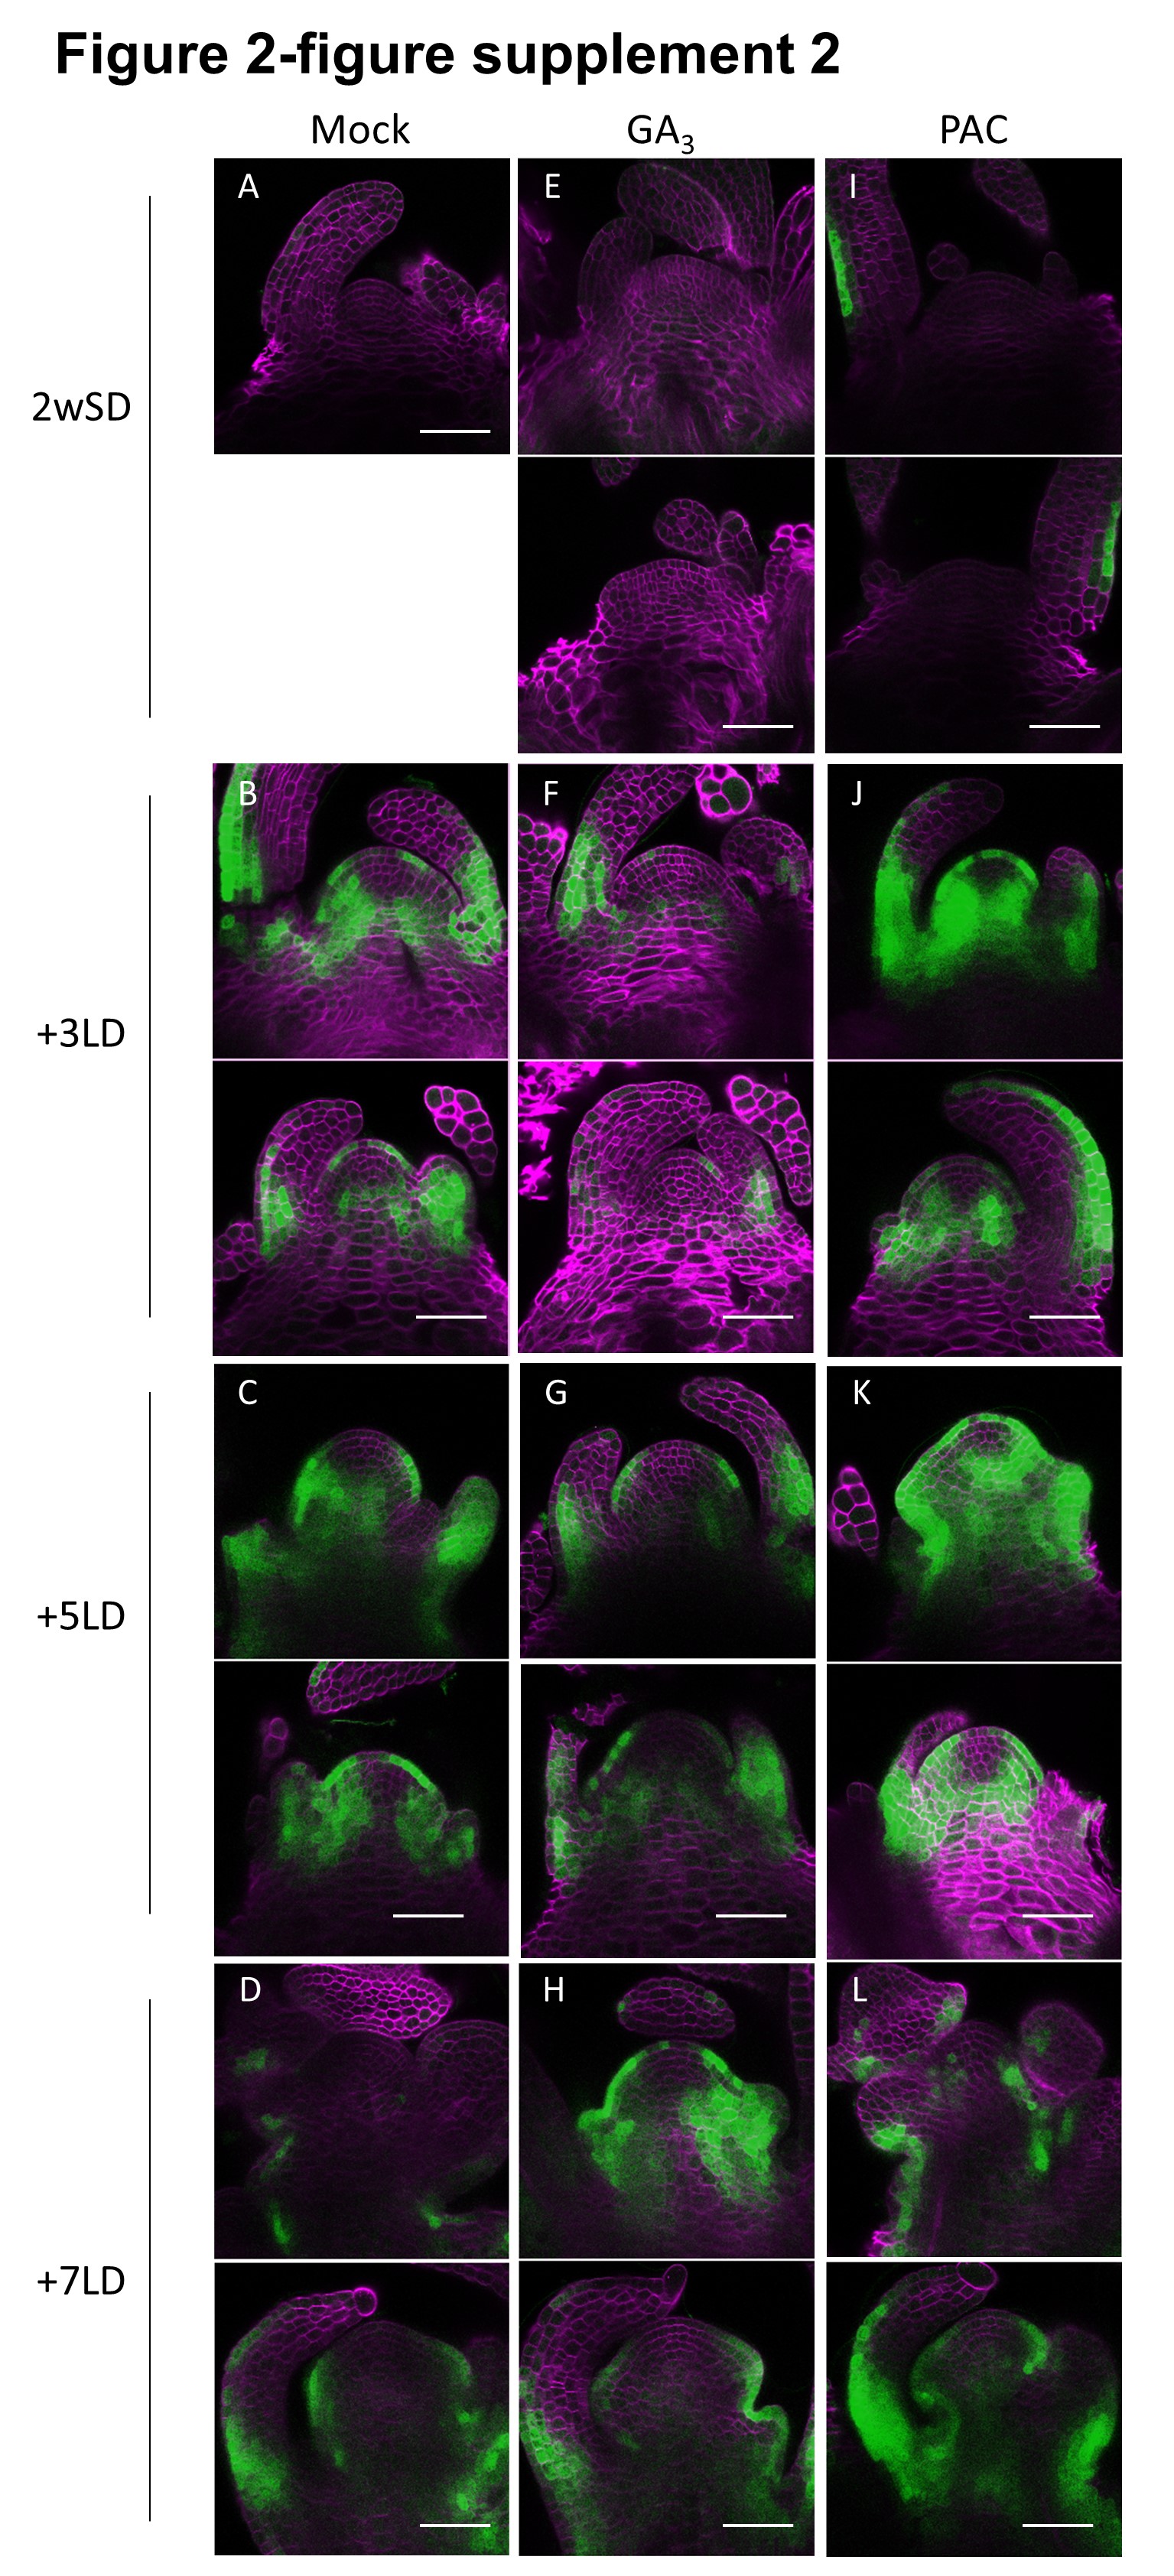

Supplement: supp [file elife-60661-supp-v1.zip › elife_poa_e60661_Figure_2_figure_supplement_2.jpg]

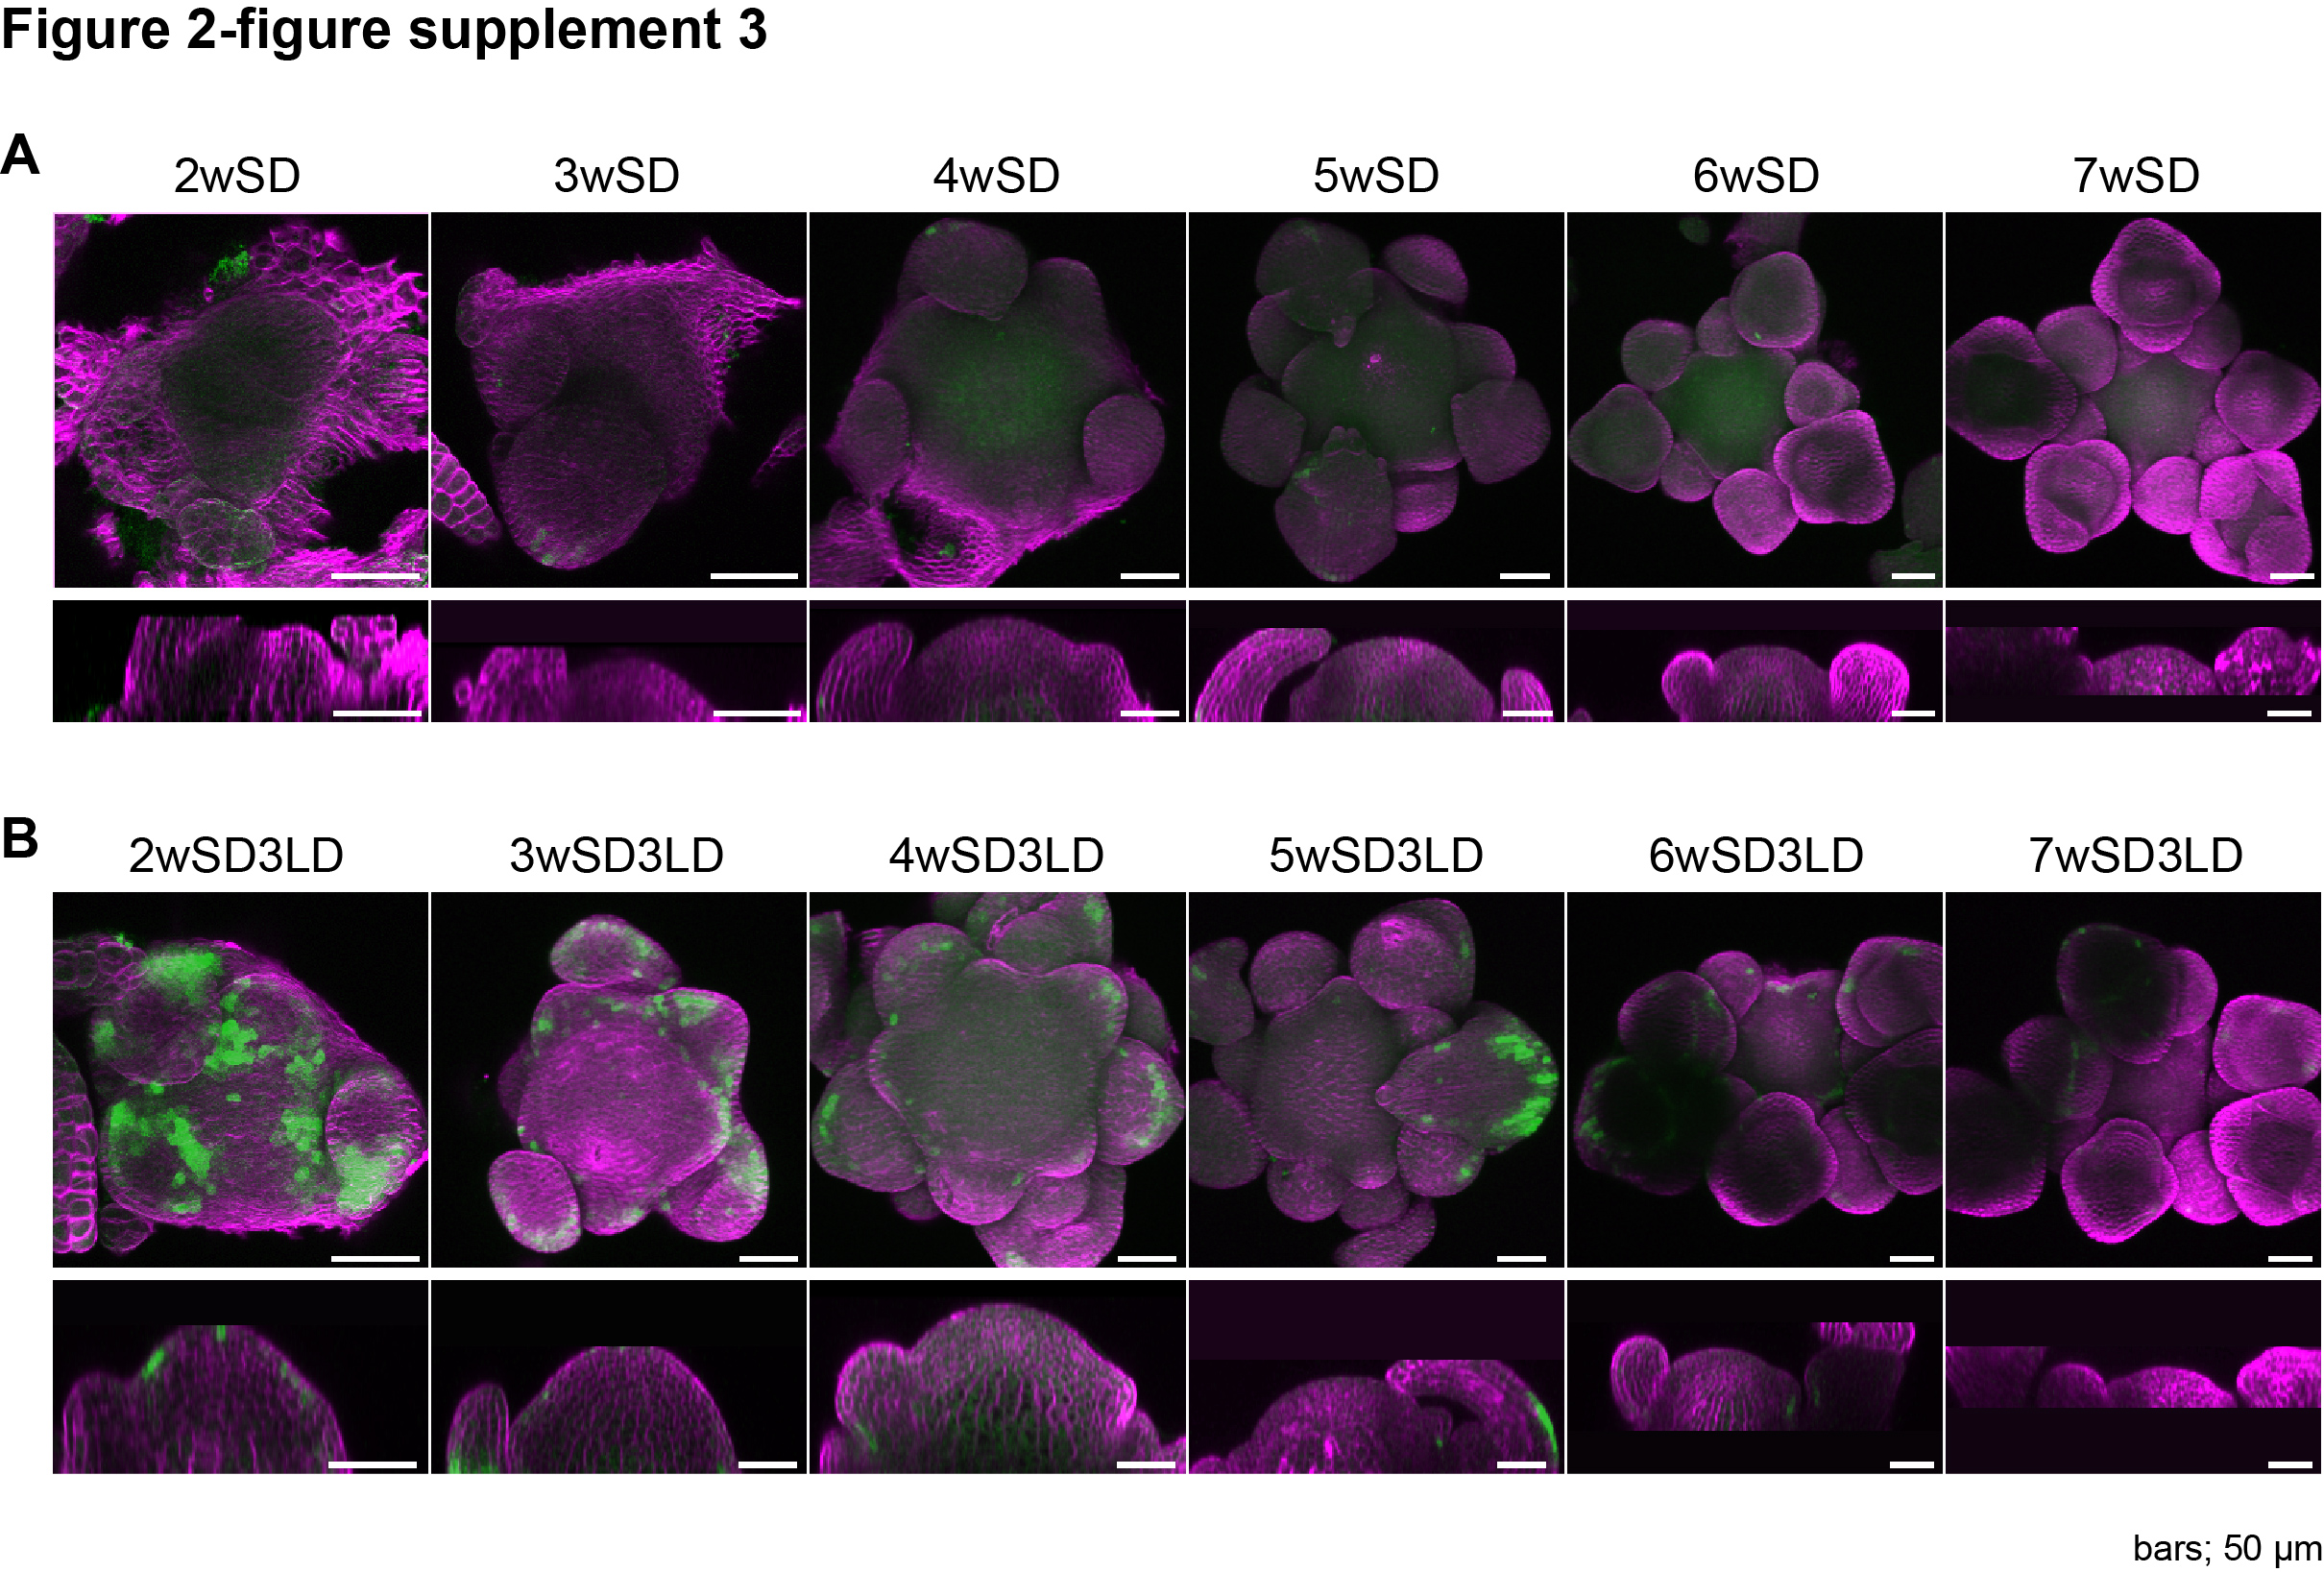

Supplement: supp [file elife-60661-supp-v1.zip › elife_poa_e60661_Figure_2_figure_supplement_3.jpg]

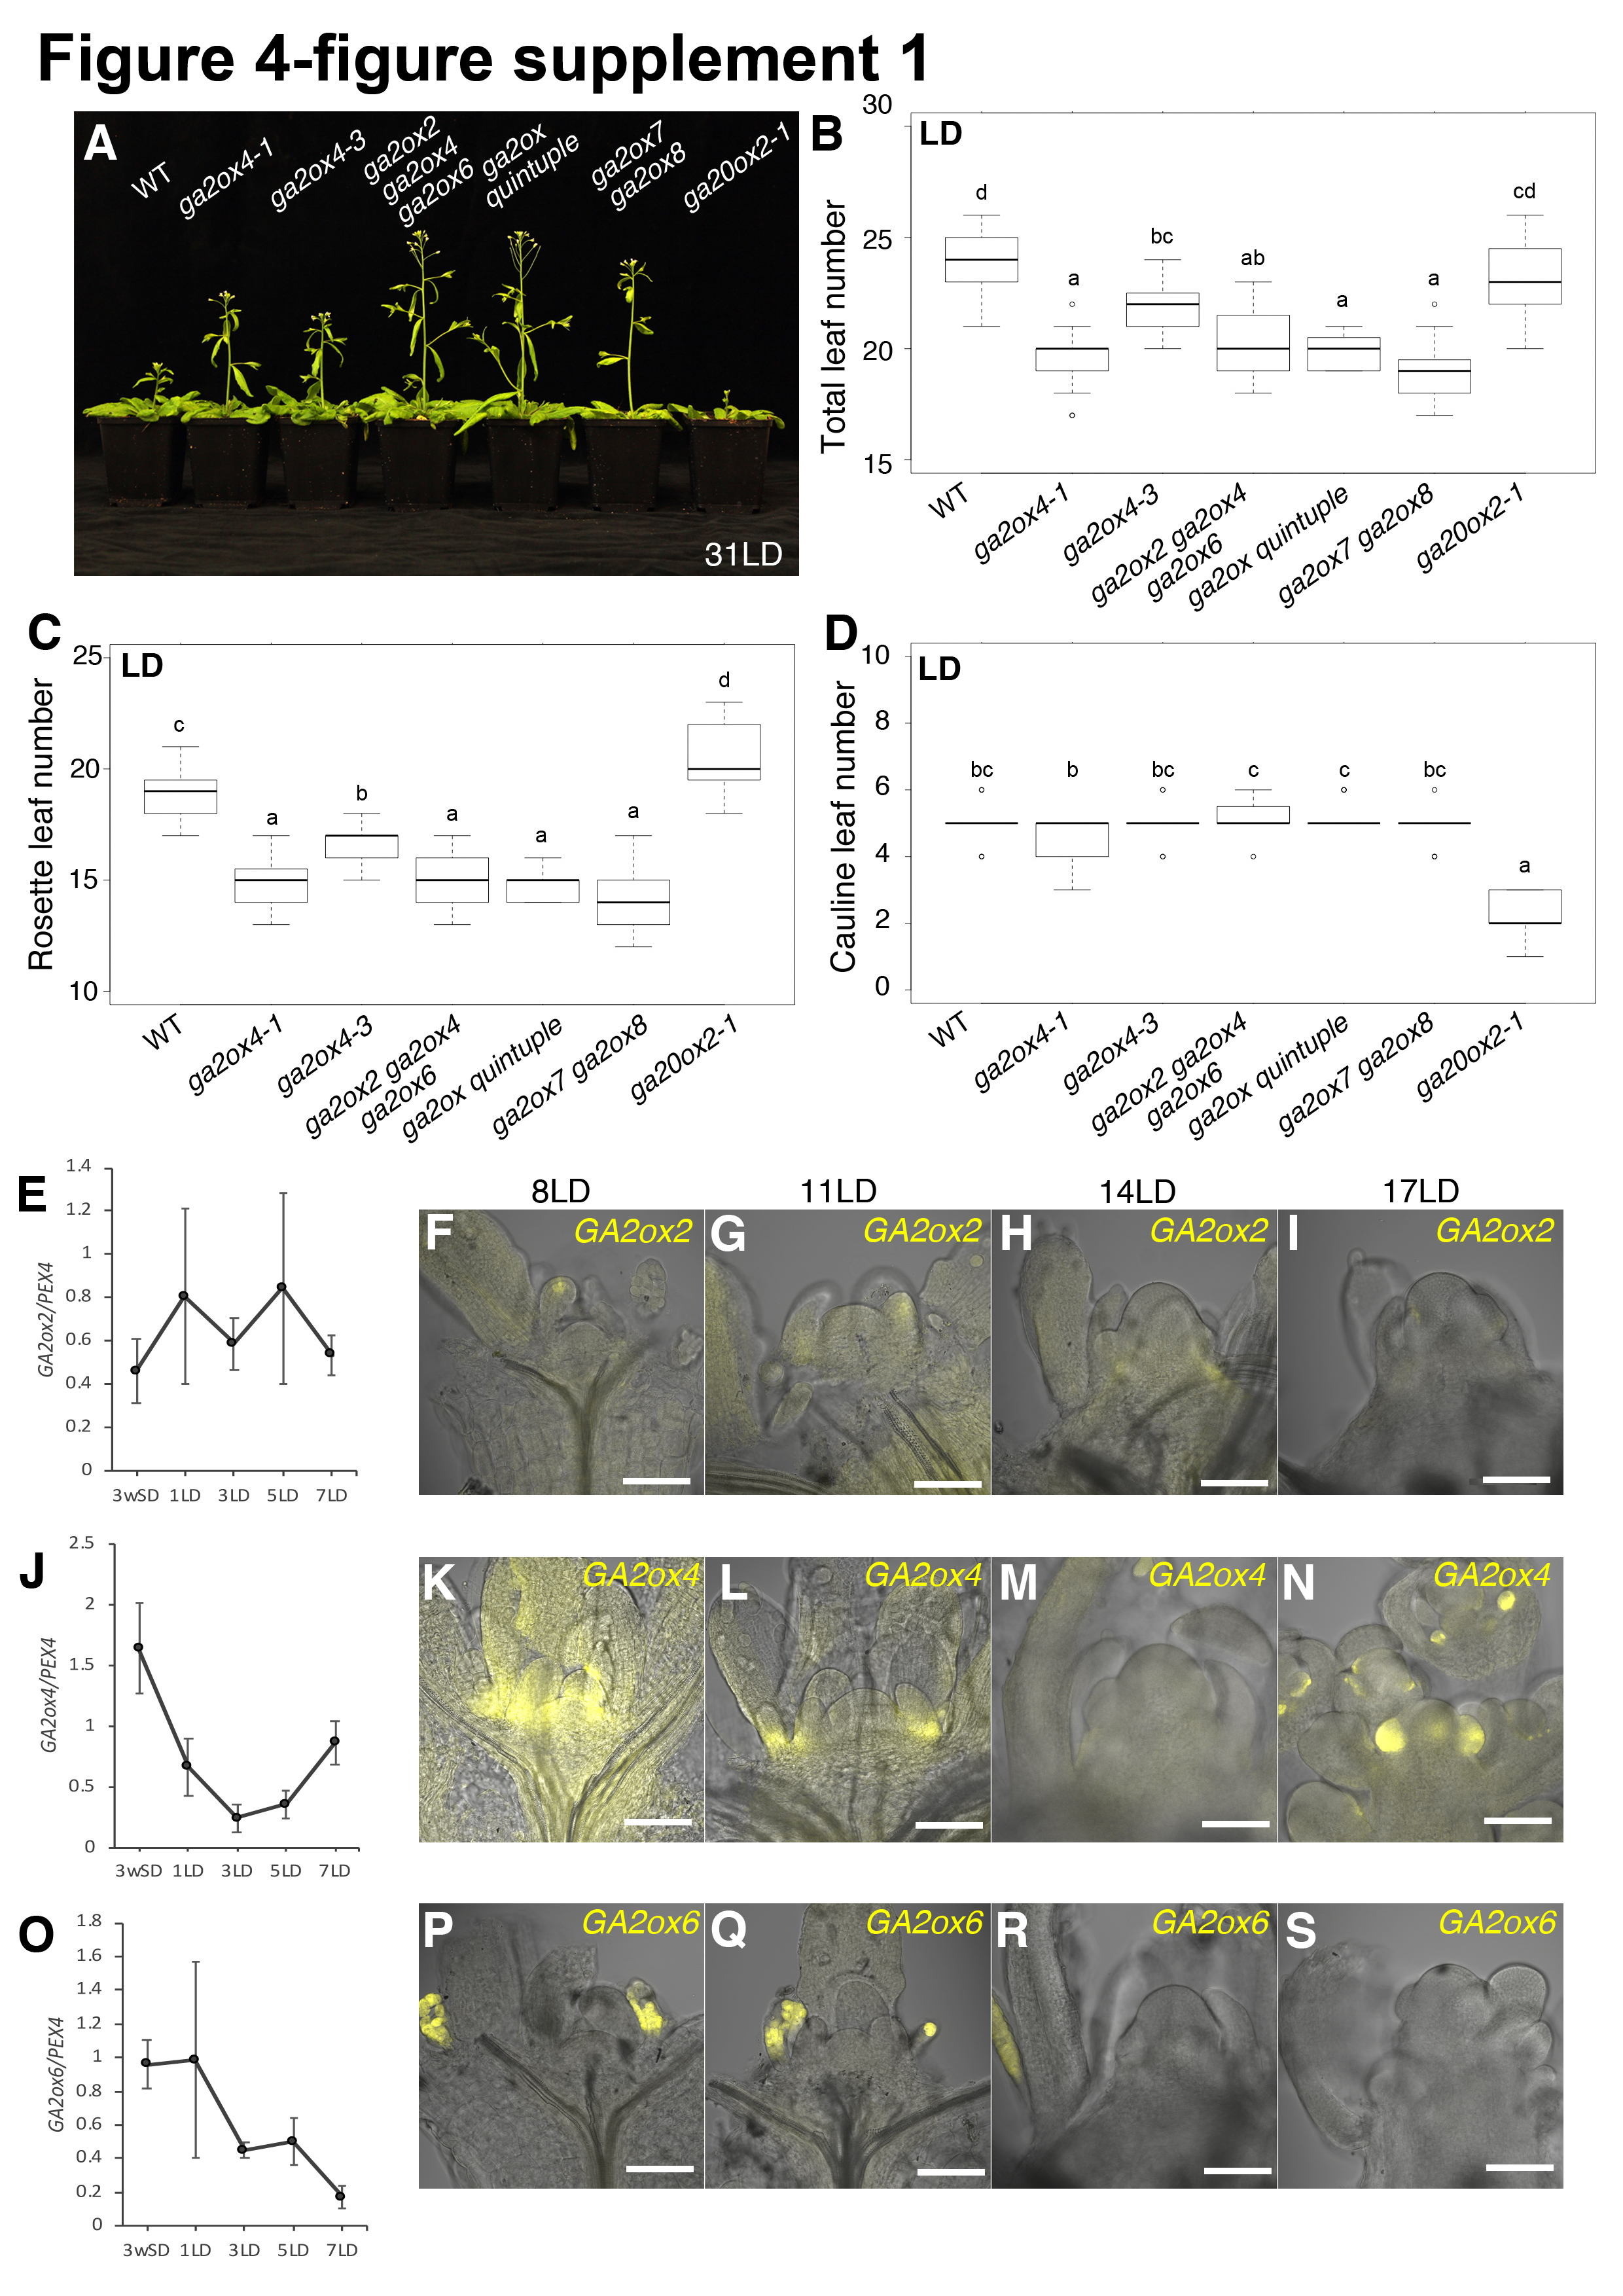

Supplement: supp [file elife-60661-supp-v1.zip › elife_poa_e60661_Figure_4_figure_supplement_1.jpg]

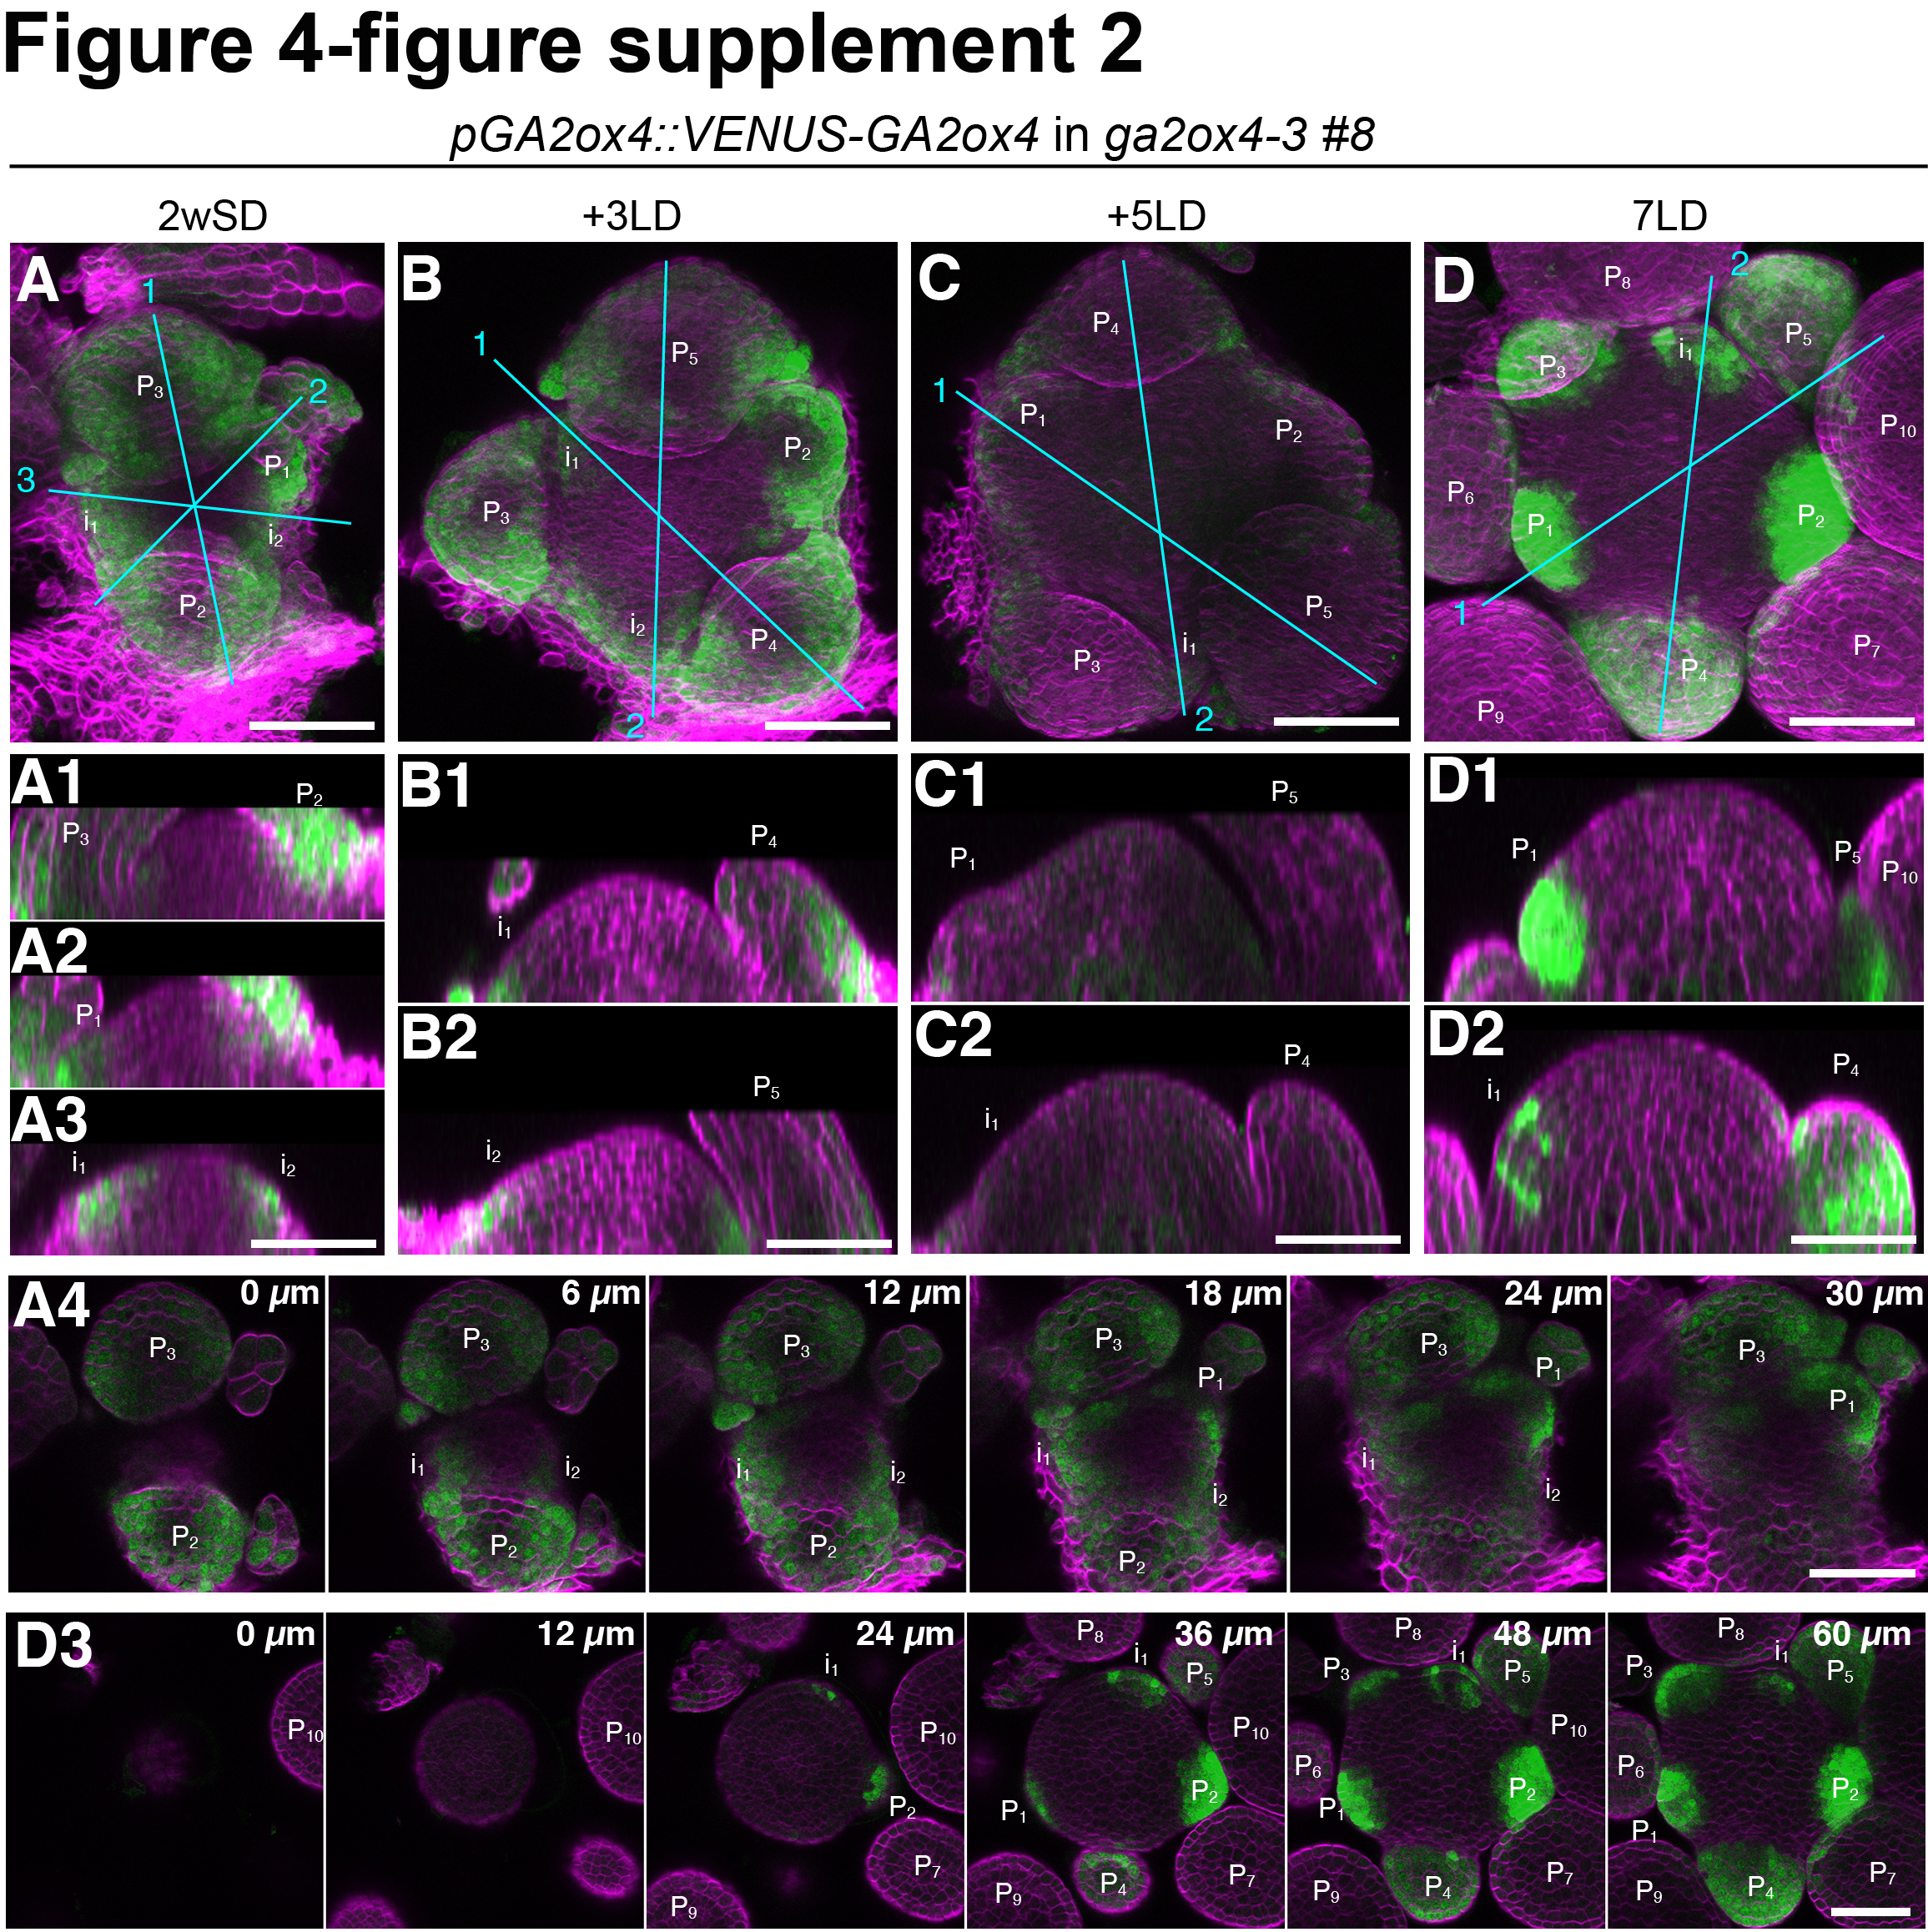

Supplement: supp [file elife-60661-supp-v1.zip › elife_poa_e60661_Figure_4_figure_supplement_2.jpg]

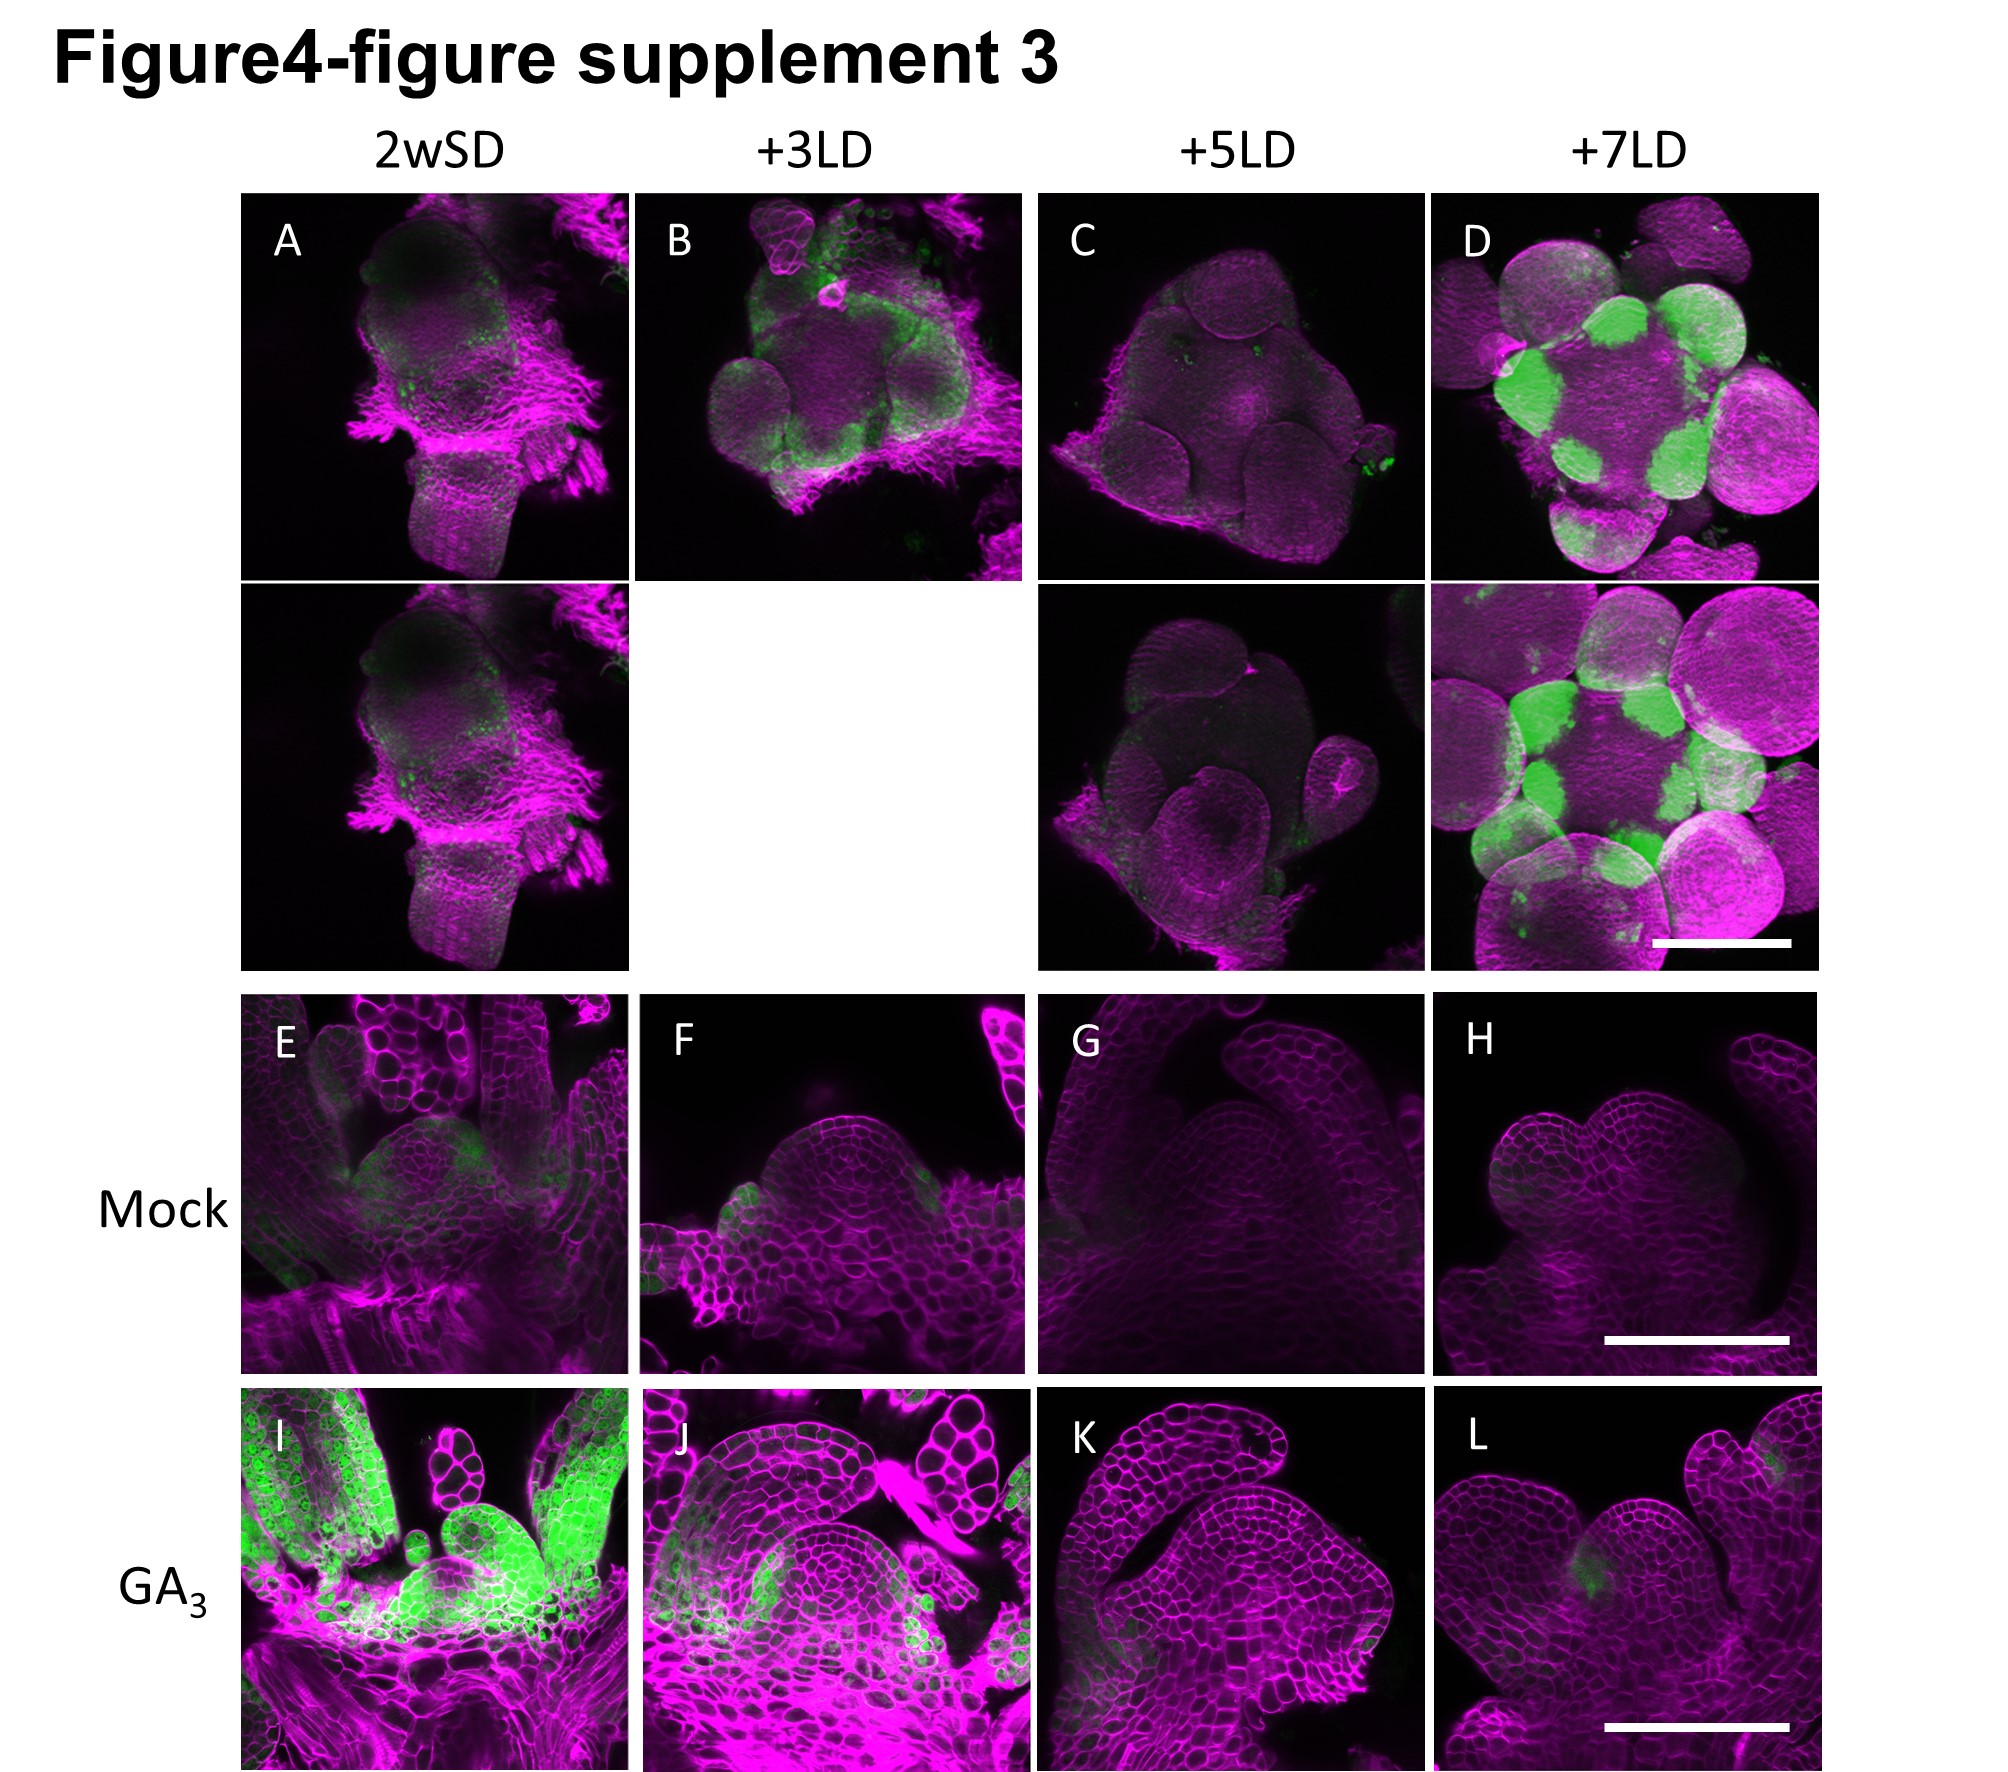

Supplement: supp [file elife-60661-supp-v1.zip › elife_poa_e60661_Figure_4_figure_supplement_3.jpg]

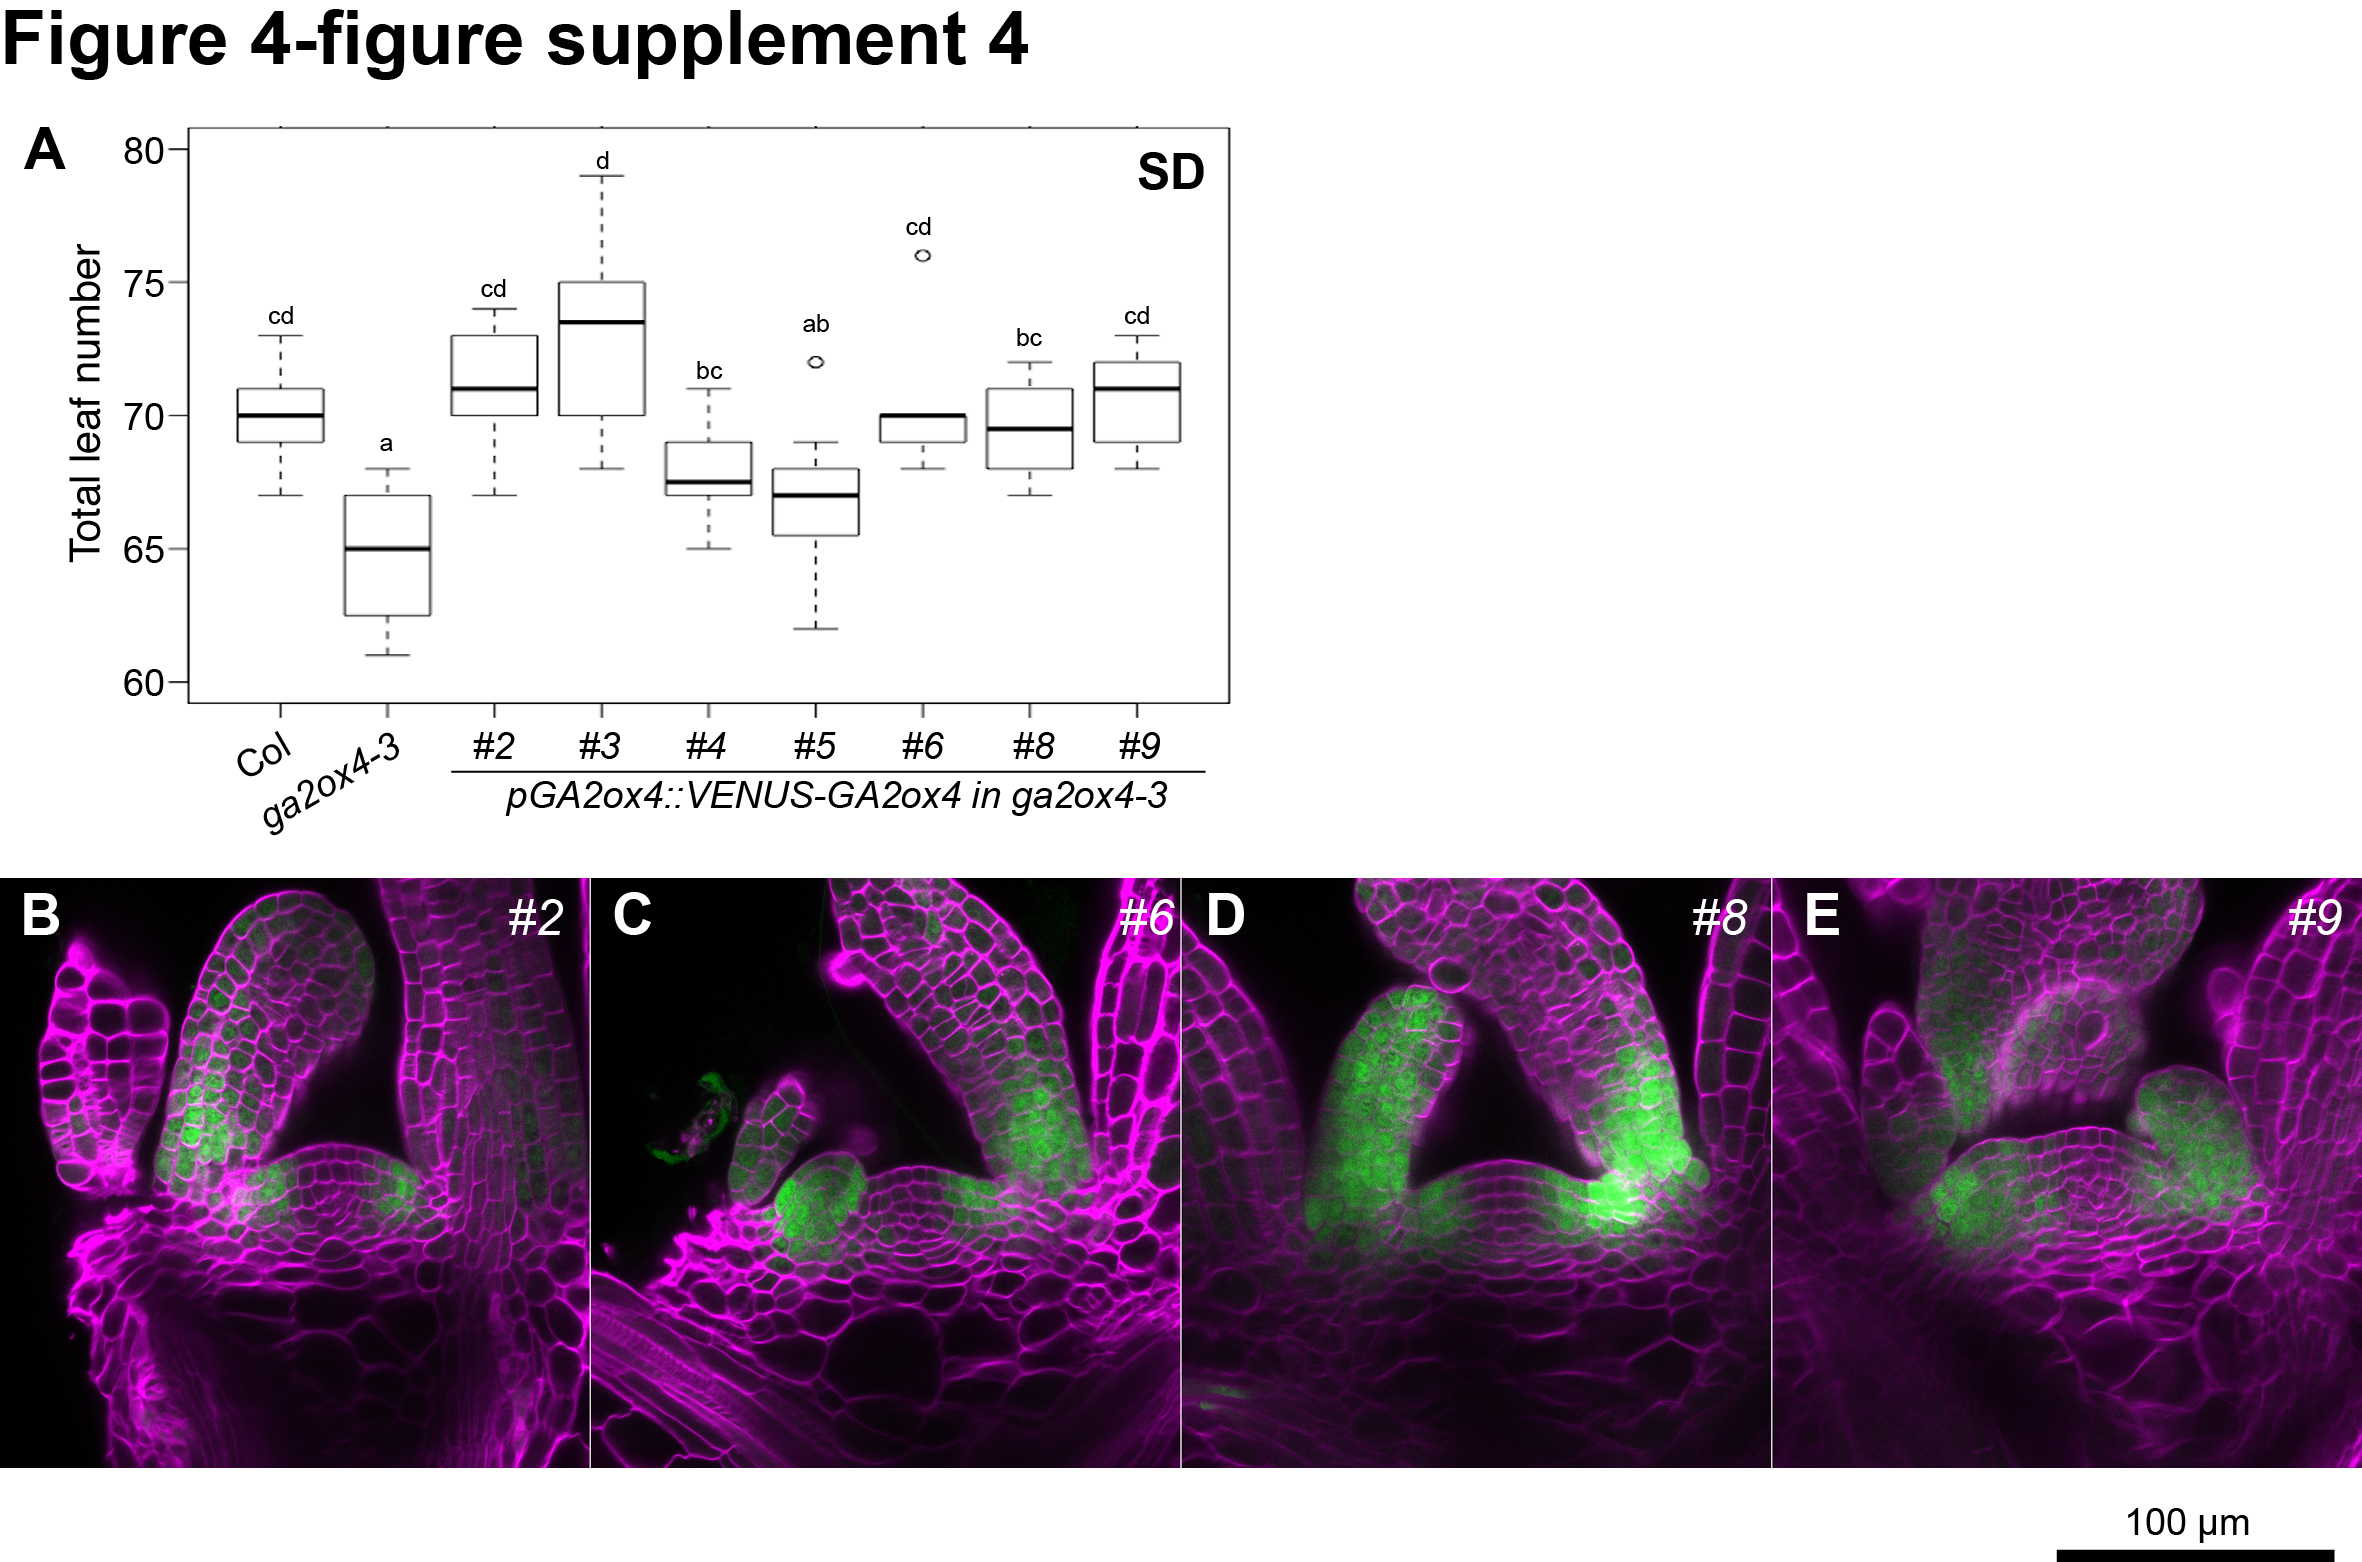

Supplement: supp [file elife-60661-supp-v1.zip › elife_poa_e60661_Figure_4_figure_supplement_4.jpg]

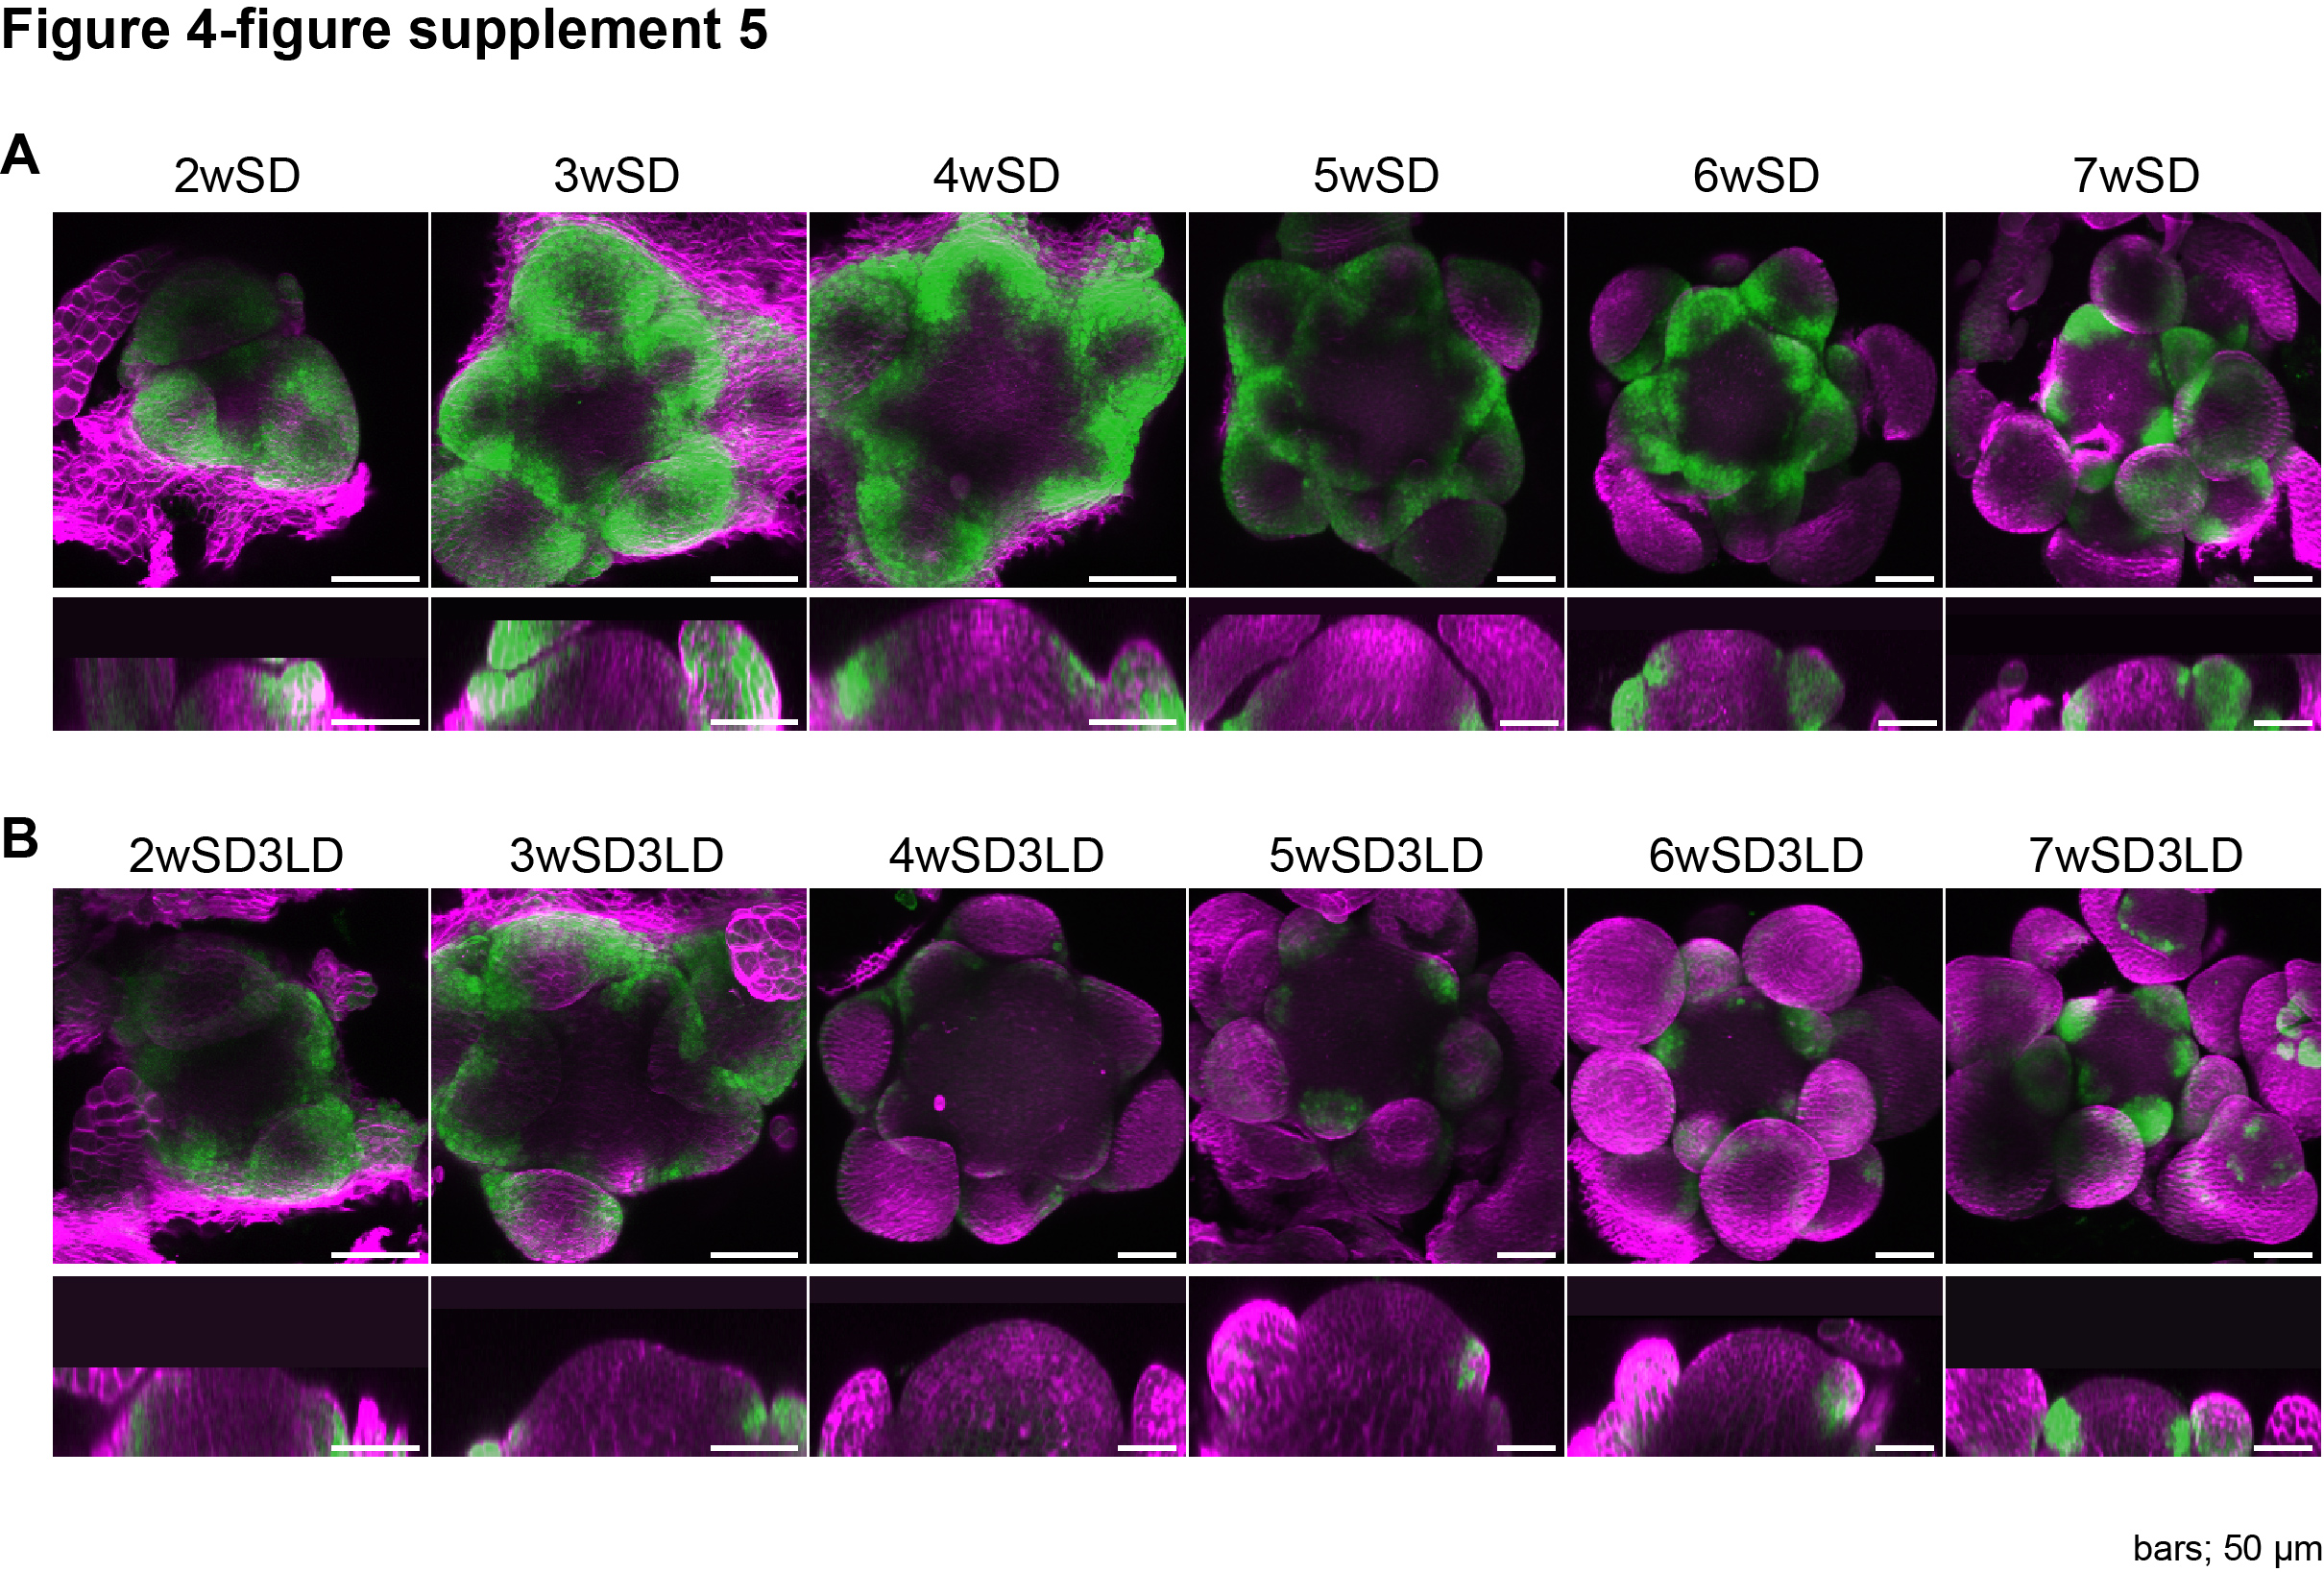

Supplement: supp [file elife-60661-supp-v1.zip › elife_poa_e60661_Figure_4_figure_supplement_5.jpg]

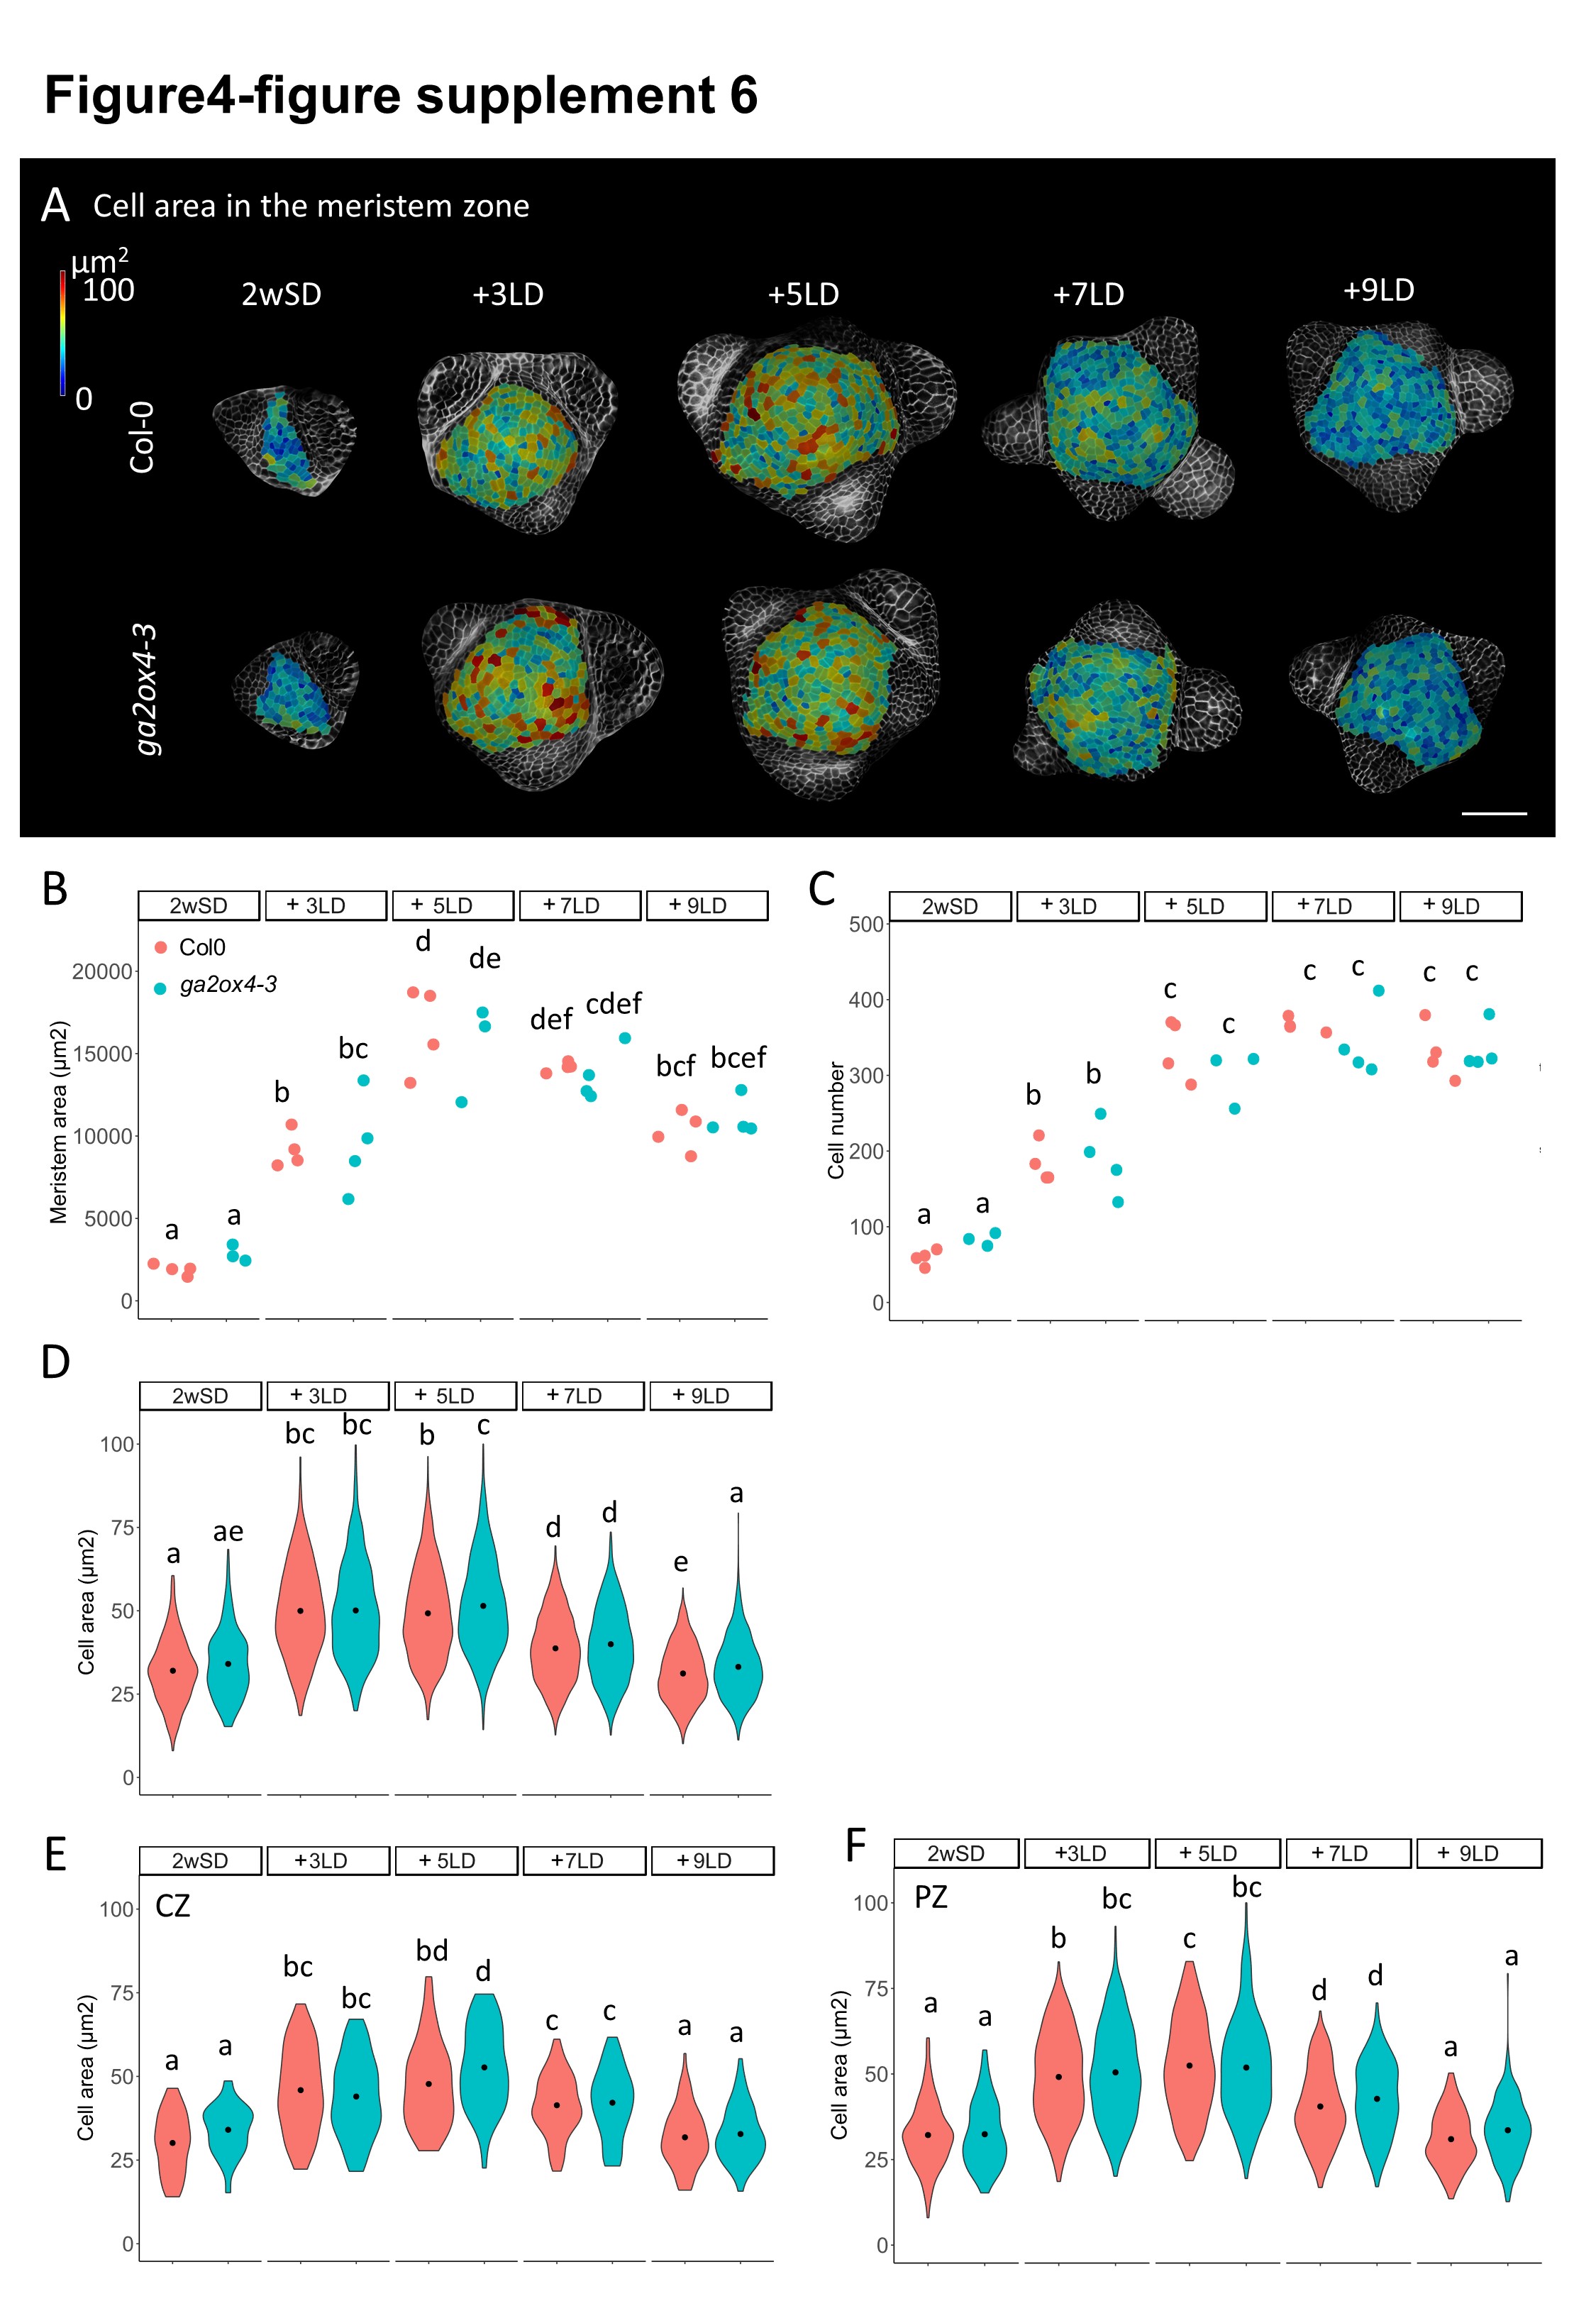

Supplement: supp [file elife-60661-supp-v1.zip › elife_poa_e60661_Figure_4_figure_supplement_6.jpg]

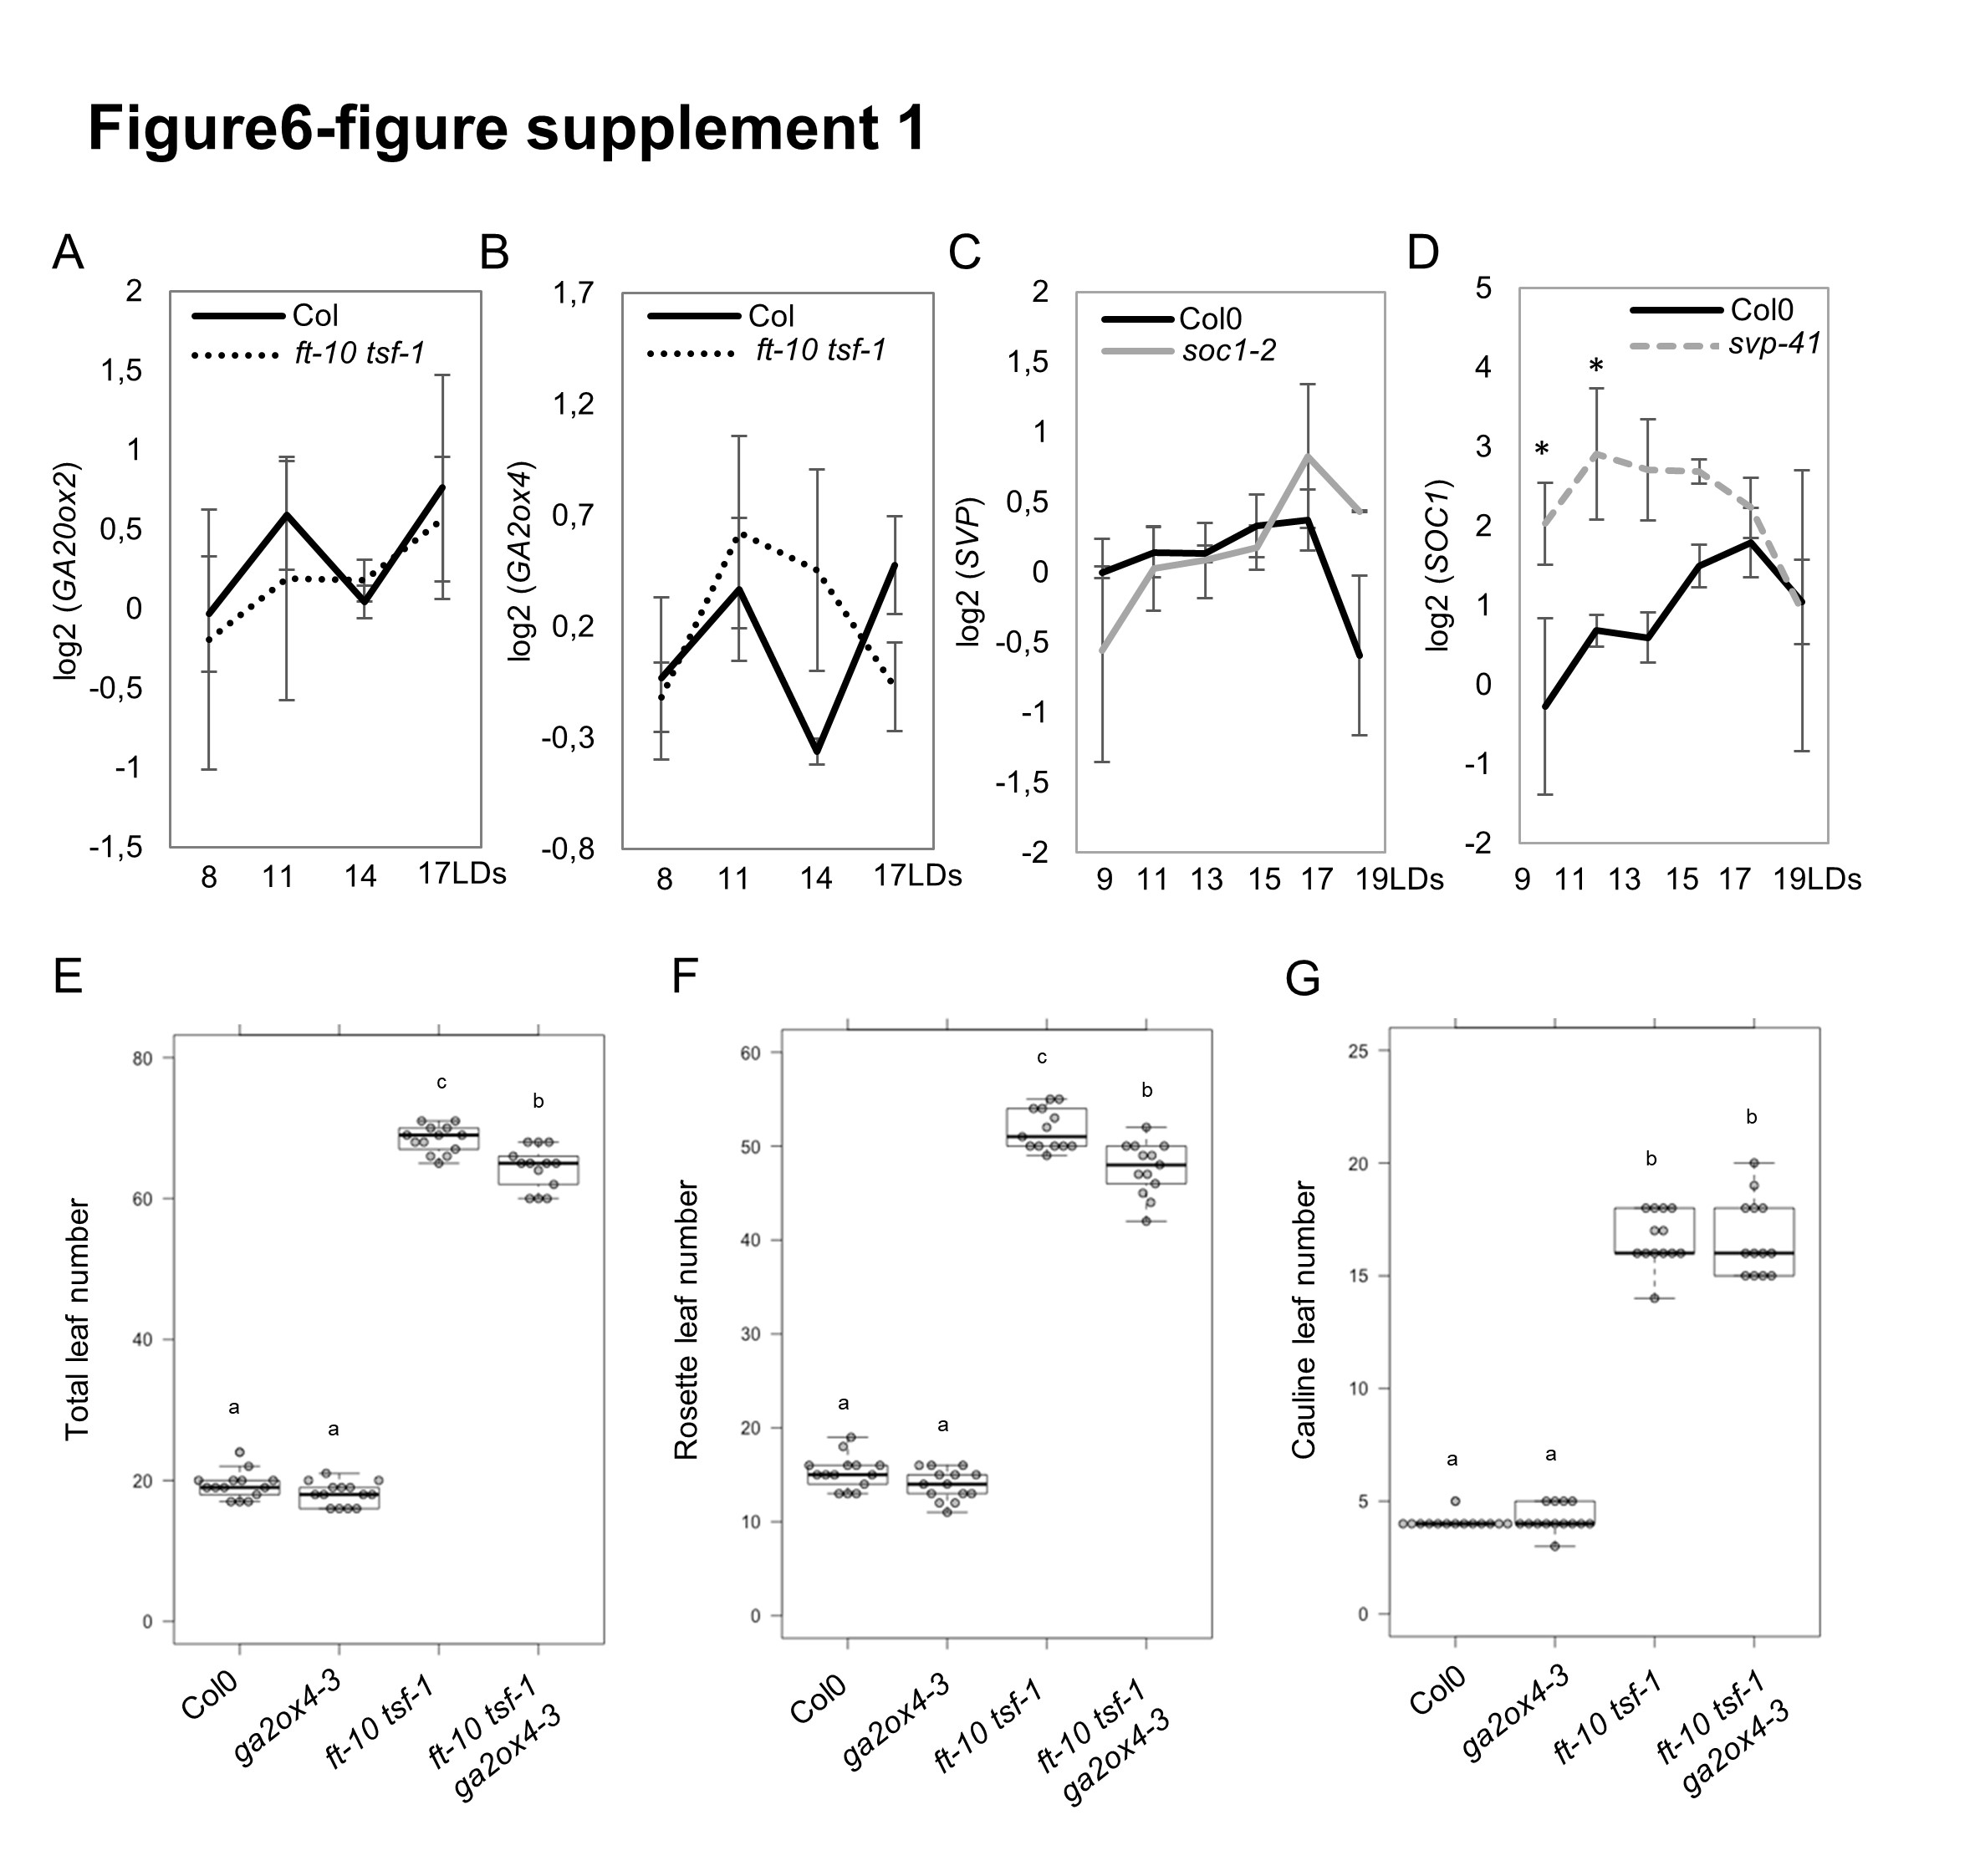

Supplement: supp [file elife-60661-supp-v1.zip › elife_poa_e60661_Figure_6_figure_supplement_1.jpg]

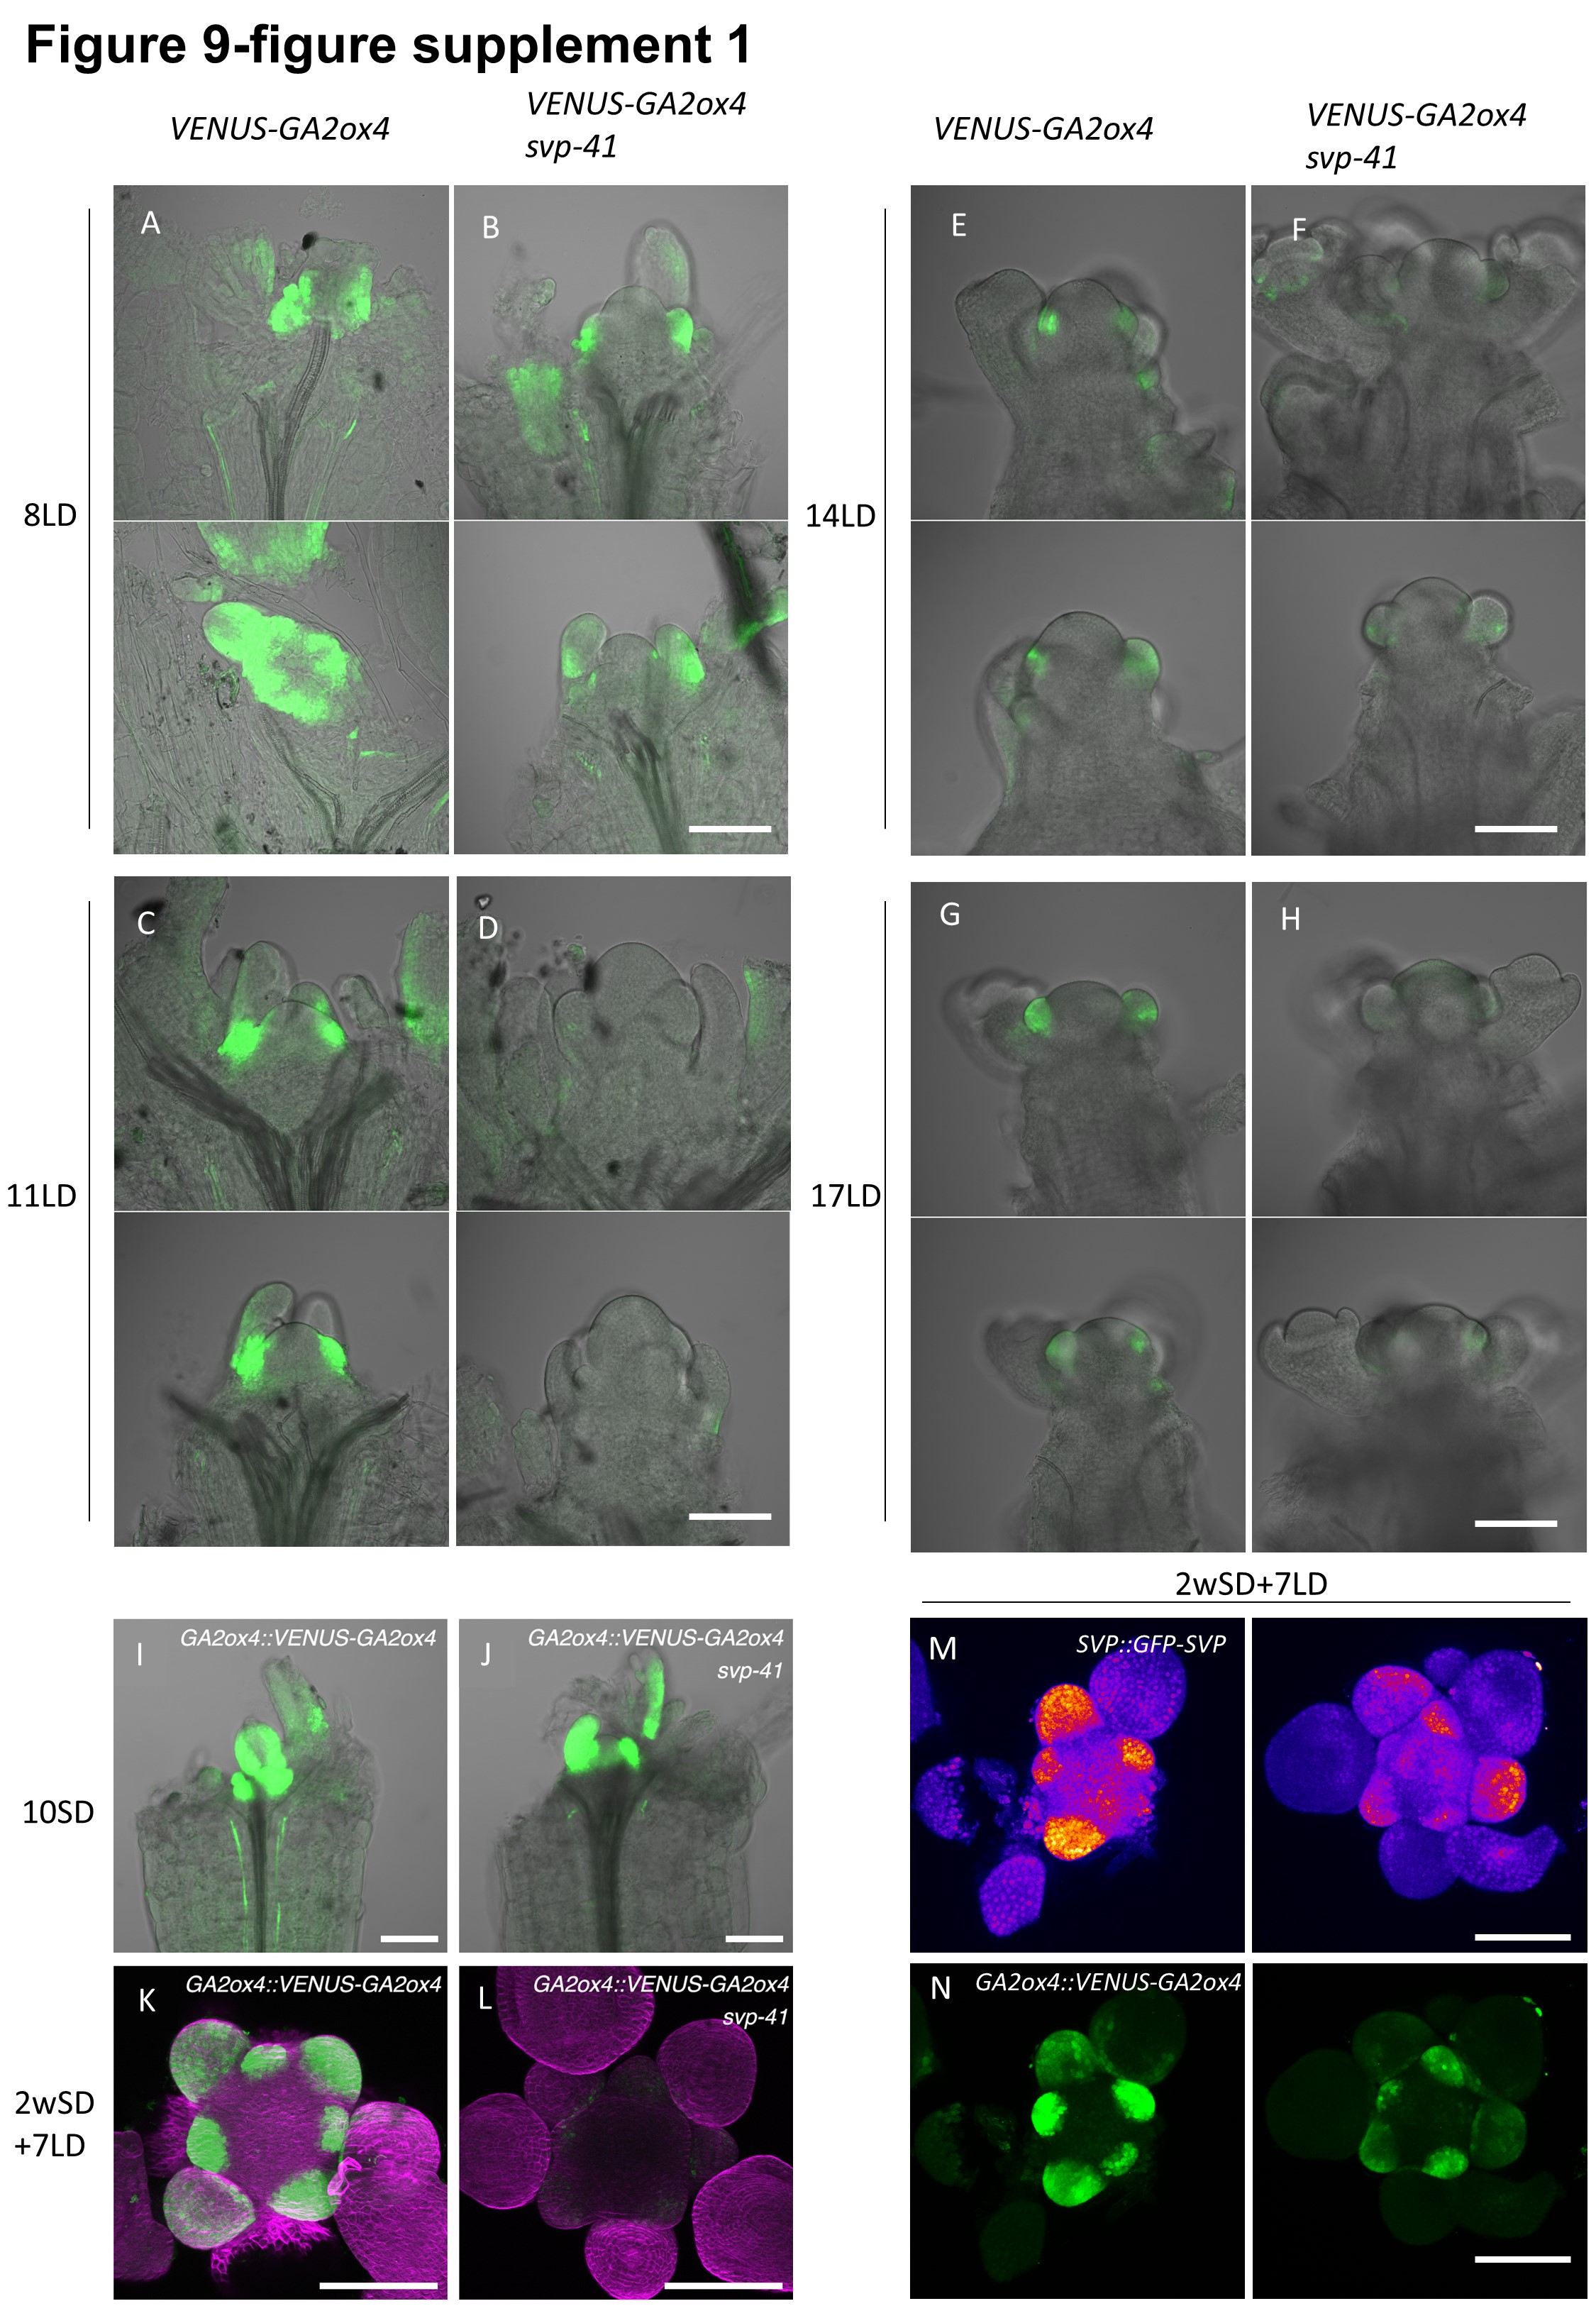

Supplement: supp [file elife-60661-supp-v1.zip › elife_poa_e60661_Figure_9_figure_supplement_1.jpg]

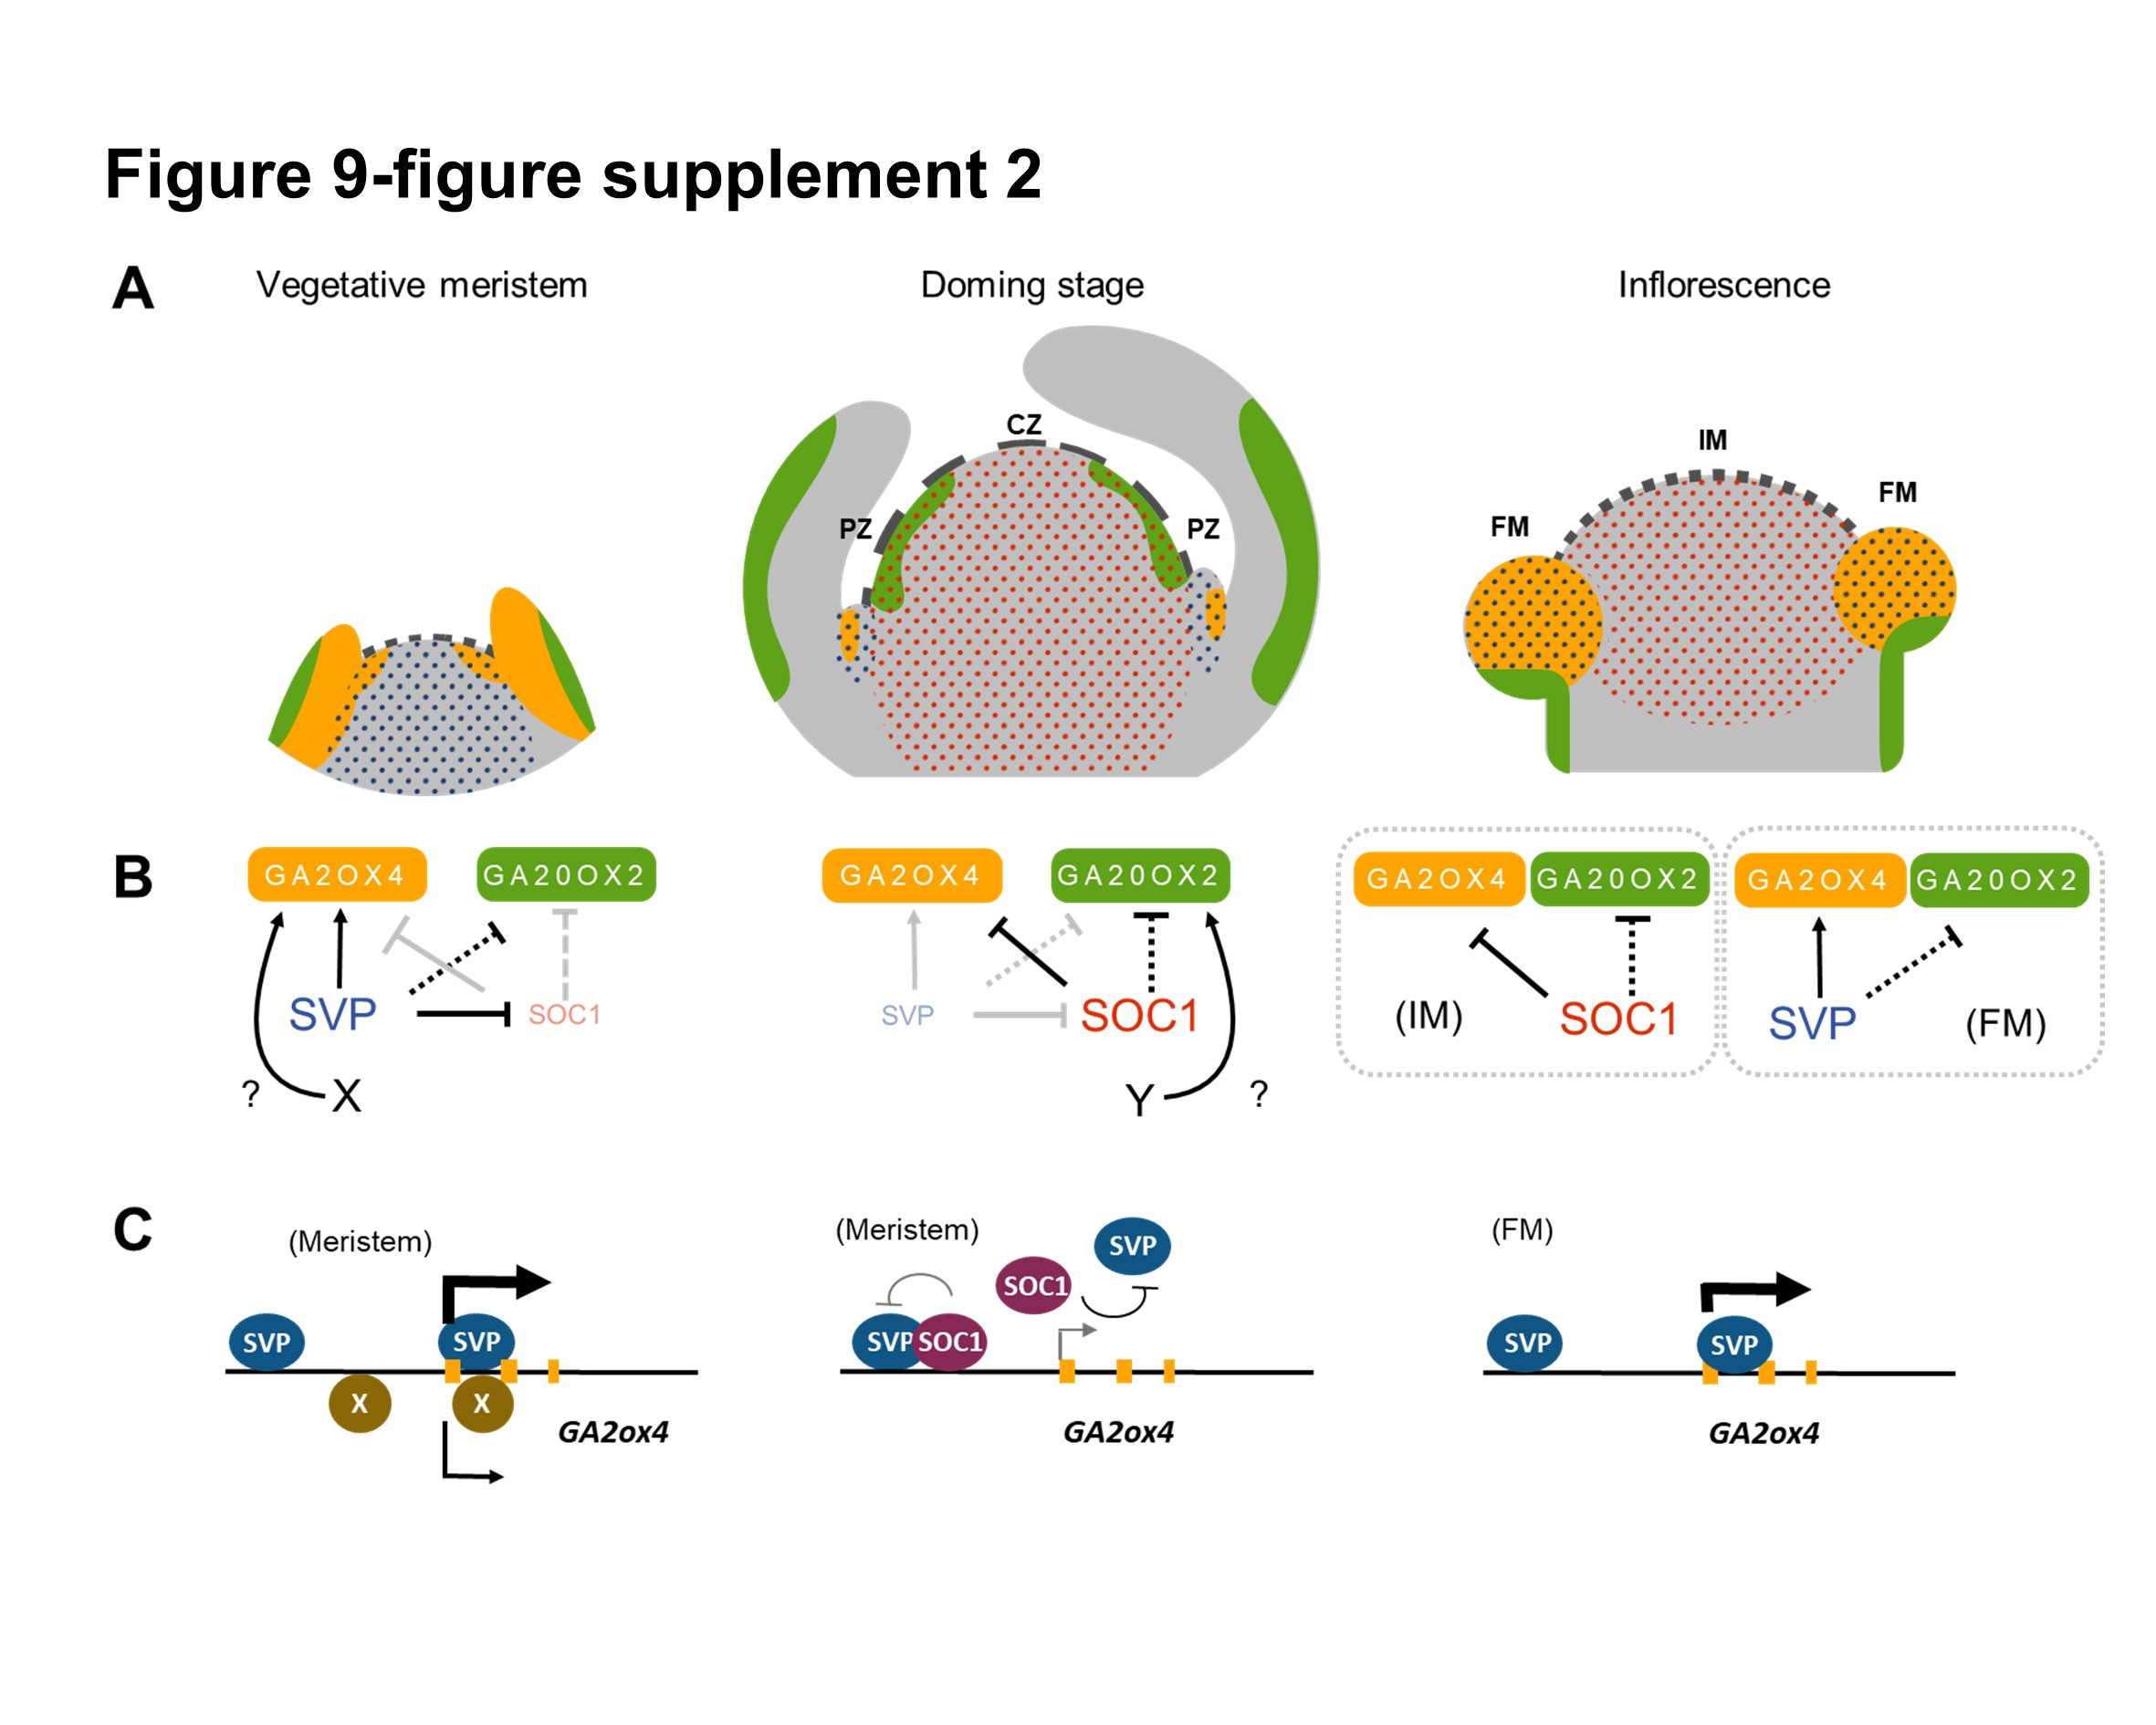

Supplement: supp [file elife-60661-supp-v1.zip › elife_poa_e60661_Figure_9_figure_supplement_2.jpg]
